# Supplementary material for: Scalable Reductive Deuteration of (Hetero)Aryl Chlorides with D2O
Source: Research Square preprint supplement (doi:10.21203/rs.3.rs-7399971/v1), 2025-08-28
Supplement: Supplementary file 1 [file 581a214c135ca0f6244e9e72.pdf]

# *Supporting Information*

## **Scalable Reductive Deuteration of (Hetero)Aryl Chlorides with D<sub>2</sub>O**

Yu-Qiu Guan<sup>a</sup>, Tian-Zhang Wang<sup>a</sup>, Muhammad Bilal<sup>a</sup>, Xin-Ru Tan<sup>a</sup>, Lutz Ackermann<sup>b\*</sup> and Yu-Feng Liang<sup>a\*</sup>

<sup>a</sup>*School of Chemistry and Chemical Engineering, Shandong University, Jinan 250100, China,*

*E-mail: yfliang@sdu.edu.cn*

<sup>b</sup>*Institut für Organische und Biomolekulare Chemie, Georg-August-Universität-Göttingen, Tammannstraße 2,*

*37077 Göttingen, Germany, E-mail: Lutz.Ackermann@chemie.uni-goettingen.de*

### **Table of Contents**

|                                                                      |             |
|----------------------------------------------------------------------|-------------|
| <b>1. General remarks .....</b>                                      | <b>S2</b>   |
| <b>2. Optimization of reaction conditions .....</b>                  | <b>S3</b>   |
| <b>3. General procedure .....</b>                                    | <b>S6</b>   |
| <b>4. Characterization data .....</b>                                | <b>S8</b>   |
| <b>5. General procedure for the synthesis of aryl chlorides.....</b> | <b>S46</b>  |
| <b>6. Mechanistic studies .....</b>                                  | <b>S47</b>  |
| <b>7. NMR Spectra .....</b>                                          | <b>S63</b>  |
| <b>8. References.....</b>                                            | <b>S153</b> |

## 1. General remarks

$^1\text{H}$  NMR,  $^{13}\text{C}$  NMR data were obtained on AVANCE III Bruker 400 or 500 MHz nuclear resonance spectrometers unless otherwise noted. Chemical shifts (in ppm) were referenced to tetramethylsilane (TMS) ( $\delta = 0.00$  ppm) in  $\text{CDCl}_3$  or dimethyl sulfoxide ( $\delta = 2.50$  ppm) in  $\text{DMSO}-d_6$  as an internal standard. The data of  $^1\text{H}$  NMR was reported as follows: chemical shift, multiplicity (s = singlet, d = doublet, t = triplet, m = multiplet and br = broad), coupling constant ( $J$  values) in Hz and integration.  $^{13}\text{C}$  NMR spectra were obtained by the same NMR spectrometers and were calibrated with  $\text{CDCl}_3$  ( $\delta = 77.00$  ppm) or  $\text{DMSO}-d_6$  ( $\delta = 39.50$  ppm). Flash chromatography was performed using 300-400 mesh silica gel with the indicated eluent according to standard techniques. Analytical thin-layer chromatography (TLC) was performed on pre-coated, glass-backed silica gel plates. Analysis of crude reaction mixture was done on an Agilent 7890 GC System with an Agilent 5975 Mass Selective Detector. Visualization of the developed chromatogram was performed by UV absorbance (254 nm) unless otherwise noted. High-resolution mass spectral (HRMS) data were recorded on Bruker APEX IV Fourier transform ion cyclotron resonance mass spectrometer using electrospray ionization (ESI) mode.

## 2. Optimization of reaction conditions

**Table S1 | Optimization of catalysts**

| entry | Cat.                        | yield <sup>a</sup> | D-inc <sup>b</sup> |
|-------|-----------------------------|--------------------|--------------------|
| 1     | NiF <sub>2</sub>            | trace              | -                  |
| 2     | NiCl <sub>2</sub>           | 87%                | 90%                |
| 3     | NiBr <sub>2</sub>           | 80%                | 88%                |
| 4     | NiI <sub>2</sub>            | 76%                | 90%                |
| 5     | <b>NiCl<sub>2</sub>•DME</b> | <b>99%</b>         | <b>&gt;99%</b>     |
| 6     | NiBr <sub>2</sub> •DME      | 91%                | 95%                |
| 7     | Ni(OTf) <sub>2</sub>        | 54%                | 89%                |
| 8     | Ni(acac) <sub>2</sub>       | 68%                | 85%                |
| 9     | Fe(OTf) <sub>3</sub>        | n.d.               | -                  |
| 10    | FeCl <sub>2</sub>           | trace              | -                  |
| 11    | CoCl <sub>2</sub>           | 44%                | 64%                |
| 12    | CrCl <sub>3</sub>           | 23%                | 51%                |
| 13    | none                        | n.d.               | -                  |

Reaction conditions: **1** (0.2 mmol), D<sub>2</sub>O (2.0 mmol), catalyst (5 mol %), 2,9-di-Me-1,10-phen (6 mol %), Zn (3.0 equiv.) and DMA (1.0 mL) at room temperature for 12 h under N<sub>2</sub>. <sup>a</sup>Determined by GC–MS analysis of the crude reaction mixture using benzophenone as an internal standard.

<sup>b</sup>Deuterium incorporation was determined by <sup>1</sup>H NMR analysis.

**Table S2 | Optimization of ligands**

| entry | ligand           | yield <sup>a</sup> | D-inc <sup>b</sup> |
|-------|------------------|--------------------|--------------------|
| 1     | L1               | 99%                | >99%               |
| 2     | L2               | 82%                | 90%                |
| 3     | L3               | 71%                | 57%                |
| 4     | L4               | 79%                | 58%                |
| 5     | L5               | 53%                | 50%                |
| 6     | L6               | 57%                | 52%                |
| 7     | L7               | 41%                | 47%                |
| 8     | L8               | n.d.               | -                  |
| 9     | w/o ligand       | 30%                | 27%                |
| 10    | PCy <sub>3</sub> | n.d.               | -                  |
| 11    | PPh <sub>3</sub> | trace              | -                  |

**L1:** R<sup>1</sup> = H, R<sup>2</sup> = Me  
**L2:** R<sup>1</sup> = R<sup>2</sup> = H  
**L3:** R<sup>1</sup> = Me, R<sup>2</sup> = H  
**L4:** R<sup>1</sup> = Ph, R<sup>2</sup> = H

**L5:** R<sup>1</sup> = R<sup>2</sup> = H  
**L6:** R<sup>1</sup> = H, R<sup>2</sup> = Me  
**L7:** R<sup>1</sup> = R<sup>2</sup> = Me

**L8**

Reaction conditions: **1** (0.2 mmol), D<sub>2</sub>O (2.0 mmol), NiCl<sub>2</sub>·DME (5 mol %), ligand (6 mol %), Zn (3.0 equiv.) and DMA (1.0 mL) at room temperature for 12 h under N<sub>2</sub>. <sup>a</sup>Determined by GC–MS analysis of the crude reaction mixture using benzophenone as an internal standard. <sup>b</sup>Deuterium incorporation was determined by <sup>1</sup>H NMR analysis.

**Table S3 | Optimization of solvents**

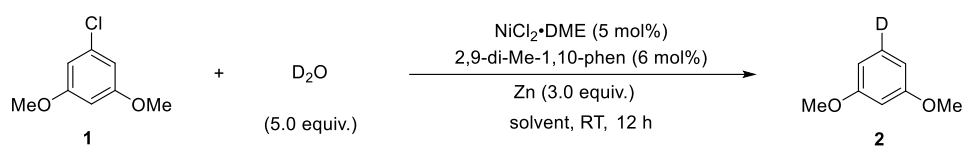

| entry | solvent     | yield <sup>a</sup> | D-inc <sup>b</sup> |
|-------|-------------|--------------------|--------------------|
| 1     | DMF         | 97%                | 94%                |
| 2     | <b>DMA</b>  | <b>99%</b>         | <b>&gt;99%</b>     |
| 3     | DMP         | 96%                | >99%               |
| 4     | DMB         | 90%                | >99%               |
| 5     | DM'B        | 82%                | >99%               |
| 6     | DMSO        | 84%                | 80%                |
| 7     | NMP         | 71%                | 82%                |
| 8     | THF         | 32%                | 27%                |
| 9     | MeCN        | 20%                | 15%                |
| 10    | DCE         | trace              | -                  |
| 11    | 1,4-dioxane | 27%                | 20%                |



Reaction conditions: **1** (0.2 mmol), D<sub>2</sub>O (2.0 mmol), NiCl<sub>2</sub>·DME (5 mol %), 2,9-di-Me-1,10-phen (6 mol %), Zn (3.0 equiv.) and solvent (1.0 mL) at room temperature for 12 h under N<sub>2</sub>. <sup>a</sup>Determined by GC–MS analysis of the crude reaction mixture using benzophenone as an internal standard. <sup>b</sup>Deuterium incorporation was determined by <sup>1</sup>H NMR analysis.

**Table S4 | Optimization of temperature**

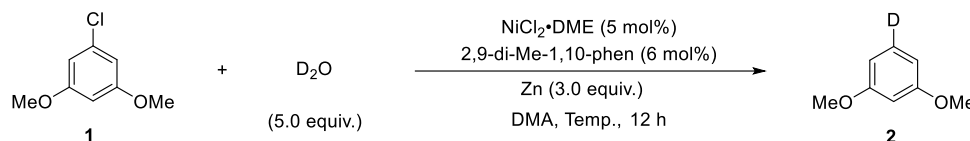

| entry | Temp.             | yield <sup>a</sup> | D-inc <sup>b</sup> |
|-------|-------------------|--------------------|--------------------|
| 1     | 0 °C              | 78%                | 92%                |
| 2     | <b>RT (25 °C)</b> | <b>99%</b>         | <b>&gt;99%</b>     |
| 3     | 50 °C             | 81%                | >99%               |
| 4     | 80 °C             | 65%                | >99%               |
| 5     | 100 °C            | 23%                | 88%                |

Reaction conditions: **1** (0.2 mmol), D<sub>2</sub>O (2.0 mmol), NiCl<sub>2</sub>·DME (5 mol %), 2,9-di-Me-1,10-phen (6 mol %), Zn (3.0 equiv.) and DMA (1.0 mL) at different temperature for 12 h under N<sub>2</sub>. <sup>a</sup>Determined by GC–MS analysis of the crude reaction mixture using benzophenone as an internal standard. <sup>b</sup>Deuterium incorporation was determined by <sup>1</sup>H NMR analysis.

**Table S5 | Optimization of the equivalents of D<sub>2</sub>O**

| entry    | equiv. of D <sub>2</sub> O | yield <sup>a</sup> | D-inc <sup>b</sup> |
|----------|----------------------------|--------------------|--------------------|
| 1        | 1.0 equiv.                 | 43%                | 63%                |
| 2        | 2.0 equiv.                 | 61%                | 80%                |
| 3        | 3.0 equiv.                 | 72%                | 95%                |
| <b>4</b> | <b>5.0 equiv.</b>          | <b>99%</b>         | <b>&gt;99%</b>     |
| 5        | 10.0 equiv.                | 99%                | >99%               |

Reaction conditions: **1** (0.2 mmol), D<sub>2</sub>O (1.0-10.0 equiv.), NiCl<sub>2</sub>·DME (5 mol %), 2,9-di-Me-1,10-phen (6 mol %), Zn (3.0 equiv.) and DMA (1.0 mL) at room temperature for 12 h under N<sub>2</sub>.

<sup>a</sup>Determined by GC–MS analysis of the crude reaction mixture using benzophenone as an internal standard. <sup>b</sup>Deuterium incorporation was determined by <sup>1</sup>H NMR analysis.

### 3. General procedure

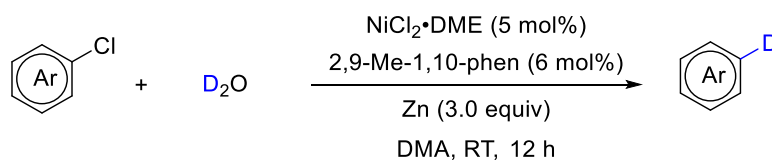

**General procedure for the nickel-catalyzed deuteration:** To a 10 mL Schlenk tube was added sequentially NiCl<sub>2</sub>·DME (2.20 mg, 0.010 mmol), 2,9-dimethyl-1,10-phenanthroline (2.50 mg, 0.012 mmol), Zn powder (40.0 mg, 0.6 mmol). The vessel was evacuated and filled with argon (three times), DMA (0.50 mL) was added *via* syringe and the mixture was stirred at room temperature for 10 min. The deuterated water (20.0 – 40.0 mg, 1.0 – 2.0 mmol) was added, followed by the addition of aryl chloride (0.2 mmol) in one portion. DMA (0.50 mL) was subsequently added *via* syringe. The resulting solution was stirred for 12 h at room temperature. After this time, the crude reaction mixture was diluted with ethyl acetate (10 mL) and washed with water (2.0 mL × 3). The organic layer was dried over Na<sub>2</sub>SO<sub>4</sub>, filtered, and concentrated. The residue was purified by flash chromatography.

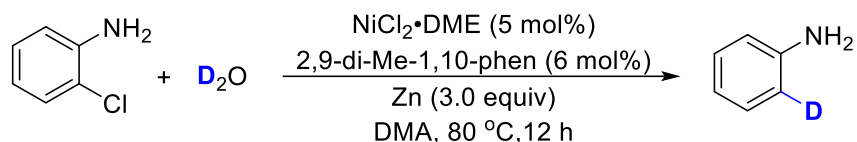

**General procedure for the kilogram synthesis of benzen-2-*d*-amine:** To a 50 L reaction kettle was added sequentially NiCl<sub>2</sub>·DME (164.79 g, 0.75 mol), 2,9-dimethyl-1,10-phenanthroline (187.43 g, 0.90 mol), Zn powder (2.93 kg, 45.0 mol). The vessel was evacuated and filled with argon. DMA (8.0 L) was added and the mixture was stirred at room temperature for 10 min. The deuterated water (3.0 kg, 150 mol) was added, followed by the addition of 2-chloroaniline (1913.55 g, 15.0 mol) in one portion. DMA (4.0 L) was subsequently added. The resulting solution was stirred for 12 h at room temperature. After this time, the crude reaction mixture was diluted with ethyl acetate (5.0 L) and washed with water (5.0 L), the additional zinc powder and solid byproduct was removed by filtrated. The organic layer was dried over Na<sub>2</sub>SO<sub>4</sub>, filtered, and concentrated. The residue was purified by reduced pressure distillation, yielded desired product (1016.7 g, 72%) as a yellow oil. More than 99% Deuterium incorporation was determined by <sup>1</sup>H NMR.

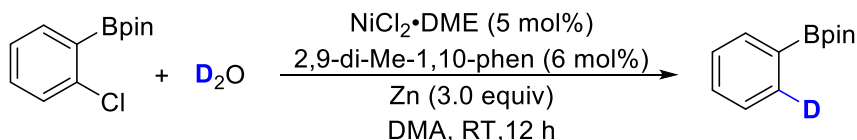

**General procedure for the kilogram synthesis of 4,4,5,5-tetramethyl-2-(phenyl-2-*d*)-1,3,2-dioxaborolane:** To a 50 L reaction kettle was added sequentially NiCl<sub>2</sub>·DME (65.92 g, 0.3 mol), 2,9-dimethyl-1,10-phenanthroline (74.97 g, 0.36 mol), Zn powder (1.18 kg, 18.0 mol). The vessel was evacuated and filled with argon. DMA (4.0 L) was added and the mixture was stirred at room temperature for 10 min. The deuterated water (1.2 kg, 60 mol) was added, followed by the addition of 2-(2-chlorophenyl)-4,4,5,5-tetramethyl-1,3,2-dioxaborolane (1431.12 g, 6.0 mol) in one portion. DMA (1.0 L) was subsequently added. The resulting solution was stirred for 12 h at room temperature. After this time, the crude reaction mixture was diluted with ethyl acetate (5.0 L) and washed with water (5.0 L), the additional zinc powder and solid byproduct was removed

by filtrated. The organic layer was dried over Na<sub>2</sub>SO<sub>4</sub>, filtered, and concentrated. The residue was purified by reduced pressure distillation, yielded desired product (1045.91 g, 85%) as a yellow oil. More than 99% Deuterium incorporation was determined by <sup>1</sup>H NMR.

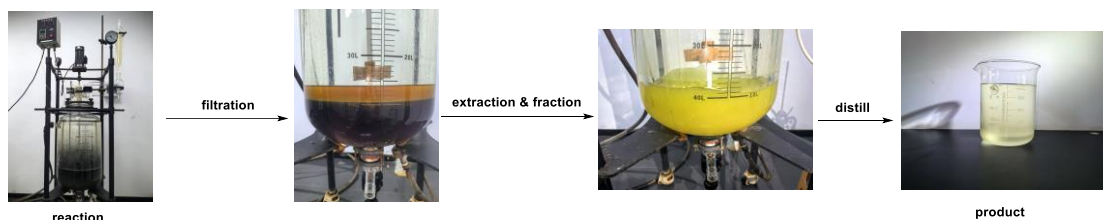

## 4. Characterization data

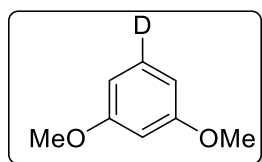

**1,3-Dimethoxybenzene-5-*d* (2)**<sup>1</sup>. The representative procedure was followed using 1-chloro-3,5-dimethoxybenzene (34.52 mg, 0.20 mmol) and D<sub>2</sub>O (18 μL, 1.0 mmol). Isolation by column chromatography (*n*-hexane : EtOAc = 100 : 1) yielded **2** (27.5 mg, 99 %) as a colorless oil. More than 99 % Deuterium incorporation was determined by <sup>1</sup>H NMR. <sup>1</sup>H NMR (500 MHz, CDCl<sub>3</sub>) δ 6.52 – 6.51 (m, 2H), 6.48 – 6.47 (m, 1H), 3.79 (s, 6H); <sup>13</sup>C NMR (125 MHz, CDCl<sub>3</sub>) δ 160.78, 129.58 (t, *J*<sub>C-D</sub> = 27.5 Hz), 105.97, 100.35, 55.22; HRMS (ESI) *m/z* ([M+H]<sup>+</sup>) Calcd. for C<sub>8</sub>H<sub>10</sub>DO<sub>2</sub> 140.0816, found: 140.0809.

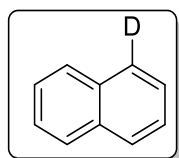

**Naphthalene-1-*d* (3)**<sup>1</sup>. The representative procedure was followed using 1-chloronaphthalene (32.52 mg, 0.20 mmol) and D<sub>2</sub>O (18 μL, 1.0 mmol). Isolation by

column chromatography (*n*-hexane) yielded **3** (23.5 mg, 91 %) as a colorless oil. More than 99 % Deuterium incorporation was determined by  $^1\text{H}$  NMR.  $^1\text{H}$  NMR (500 MHz,  $\text{CDCl}_3$ )  $\delta$  7.85 – 7.83 (m, 3H), 7.48 – 7.46 (m, 4H);  $^{13}\text{C}$  NMR (125 MHz,  $\text{CDCl}_3$ )  $\delta$  133.41, 133.35, 127.85, 127.81, 127.53 (t,  $J_{\text{C-D}} = 24.5$  Hz), 125.79, 125.67; HRMS (ESI)  $m/z$  ( $[\text{M}+\text{H}]^+$ ) Calcd. for  $\text{C}_{10}\text{H}_8\text{D}$  130.0762, found: 130.0768.

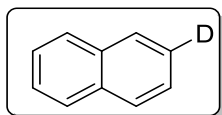

**Naphthalene-2-*d* (4)**<sup>2</sup>. The representative procedure was followed using 2-chloronaphthalene (32.52 mg, 0.20 mmol) and  $\text{D}_2\text{O}$  (18  $\mu\text{L}$ , 1.0 mmol). Isolation by column chromatography (*n*-hexane) yielded **4** (22.7 mg, 88 %) as a colorless oil. 99 % Deuterium incorporation was determined by  $^1\text{H}$  NMR.  $^1\text{H}$  NMR (500 MHz,  $\text{CDCl}_3$ )  $\delta$  7.85 – 7.83 (m, 4H), 7.49 – 7.47 (m, 3H);  $^{13}\text{C}$  NMR (125 MHz,  $\text{CDCl}_3$ )  $\delta$  133.42, 127.86, 127.74, 125.79, 125.69, 125.51 (t,  $J_{\text{C-D}} = 24.5$  Hz); HRMS (ESI)  $m/z$  ( $[\text{M}+\text{H}]^+$ ) Calcd. for  $\text{C}_{10}\text{H}_8\text{D}$  130.0762, found: 130.0766.

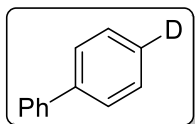

**1,1'-Biphenyl-4-*d* (5)**<sup>2</sup>. The representative procedure was followed using 4-chloro-1,1'-biphenyl (37.73 mg, 0.20 mmol) and  $\text{D}_2\text{O}$  (18  $\mu\text{L}$ , 1.0 mmol). Isolation by column chromatography (*n*-hexane) yielded **5** (27.9 mg, 90 %) as a white solid. 98 % Deuterium incorporation was determined by  $^1\text{H}$  NMR.  $^1\text{H}$  NMR (500 MHz,  $\text{CDCl}_3$ )  $\delta$  7.52 – 7.50 (m, 4H), 7.37 – 7.34 (m, 4H), 7.28 – 7.24 (m, 1H);  $^{13}\text{C}$  NMR (125 MHz,  $\text{CDCl}_3$ )  $\delta$  141.22, 128.72, 128.61, 127.22, 127.14, 126.93 (t,  $J_{\text{C-D}} = 24.5$  Hz); HRMS (ESI)  $m/z$  ( $[\text{M}+\text{H}]^+$ ) Calcd. for  $\text{C}_{12}\text{H}_{10}\text{D}$  156.0918, found: 156.0911.

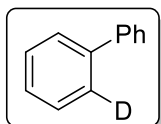

**1,1'-Biphenyl-2-*d* (6)**<sup>2</sup>. The representative procedure was followed using 2-chloro-1,1'-biphenyl (37.73 mg, 0.20 mmol) and D<sub>2</sub>O (18 μL, 1.0 mmol). Isolation by column chromatography (*n*-hexane) yielded **6** (24.8 mg, 80 %) as a white solid. More than 99 % Deuterium incorporation was determined by <sup>1</sup>H NMR. **<sup>1</sup>H NMR (500 MHz, CDCl<sub>3</sub>) δ** 7.52 – 7.50 (m, 3H), 7.37 – 7.34 (m, 4H), 7.28 – 7.24 (m, 2H); **<sup>13</sup>C NMR (125 MHz, CDCl<sub>3</sub>) δ** 141.19, 141.14, 128.73, 128.62, 127.22, 127.14, 126.84 (t, *J*<sub>C-D</sub> = 23.5 Hz); **HRMS (ESI) *m/z* ([M+H]<sup>+</sup>)** Calcd. for C<sub>12</sub>H<sub>10</sub>D 156.0918, found: 156.0914.

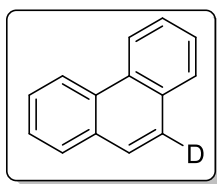

**Phenanthrene-9-*d* (7)**<sup>2</sup>. The representative procedure was followed using 9-chlorophenanthrene (42.54 mg, 0.20 mmol) and D<sub>2</sub>O (18 μL, 1.0 mmol). Isolation by column chromatography (*n*-hexane) yielded **7** (26.9 mg, 75 %) as a white solid. 96 % Deuterium incorporation was determined by <sup>1</sup>H NMR. **<sup>1</sup>H NMR (500 MHz, CDCl<sub>3</sub>) δ** 8.67 (d, *J* = 8.0 Hz, 2H), 7.87 (d, *J* = 8.0 Hz, 2H), 7.72 (s, 1H), 7.63 (t, *J* = 7.0 Hz, 2H), 7.58 (t, *J* = 7.0 Hz, 2H); **<sup>13</sup>C NMR (125 MHz, CDCl<sub>3</sub>) δ** 132.02, 131.96, 130.27, 128.54, 128.48, 126.76, 126.57 (t, *J*<sub>C-D</sub> = 24.0 Hz), 126.52, 122.63; **HRMS (ESI) *m/z* ([M+H]<sup>+</sup>)** Calcd. for C<sub>14</sub>H<sub>10</sub>D 180.0918, found: 180.0916.

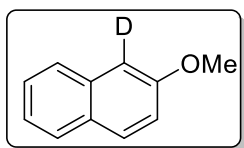

**2-Methoxynaphthalene-1-*d* (8)**<sup>3</sup>. The representative procedure was followed using 1-chloro-2-methoxynaphthalene (38.53 mg, 0.20 mmol) and D<sub>2</sub>O (18 μL, 1.0 mmol). Isolation by column chromatography (*n*-hexane : EtOAc = 100 : 1) yielded **8** (30.6 mg, 96 %) as a white solid. More than 99 % Deuterium incorporation was determined by <sup>1</sup>H NMR. **<sup>1</sup>H NMR (500 MHz, CDCl<sub>3</sub>) δ** 7.68 – 7.63 (m, 3H), 7.36 – 7.32 (m, 1H), 7.26 – 7.22 (m, 1H), 7.07 – 7.05 (m, 1H), 3.81 (s, 3H); **<sup>13</sup>C NMR (125 MHz, CDCl<sub>3</sub>) δ** 157.46, 134.43, 129.33, 128.86, 127.61, 126.63, 126.32, 123.53, 118.69, 105.32 (t,

$J_{C-D} = 24.0$  Hz), 55.22; **HRMS** (ESI)  $m/z$  ( $[M+H]^+$ ) Calcd. for  $C_{11}H_{10}DO$  160.0867, found: 160.0869.

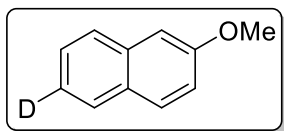

**2-Methoxynaphthalene-6-*d* (9)**<sup>2</sup>. The representative procedure was followed using 2-chloro-6-methoxynaphthalene (38.53 mg, 0.20 mmol) and  $D_2O$  (18  $\mu L$ , 1.0 mmol). Isolation by column chromatography (*n*-hexane : EtOAc = 100 : 1) yielded **9** (28.7 mg, 90 %) as a white solid. 95 % Deuterium incorporation was determined by  $^1H$  NMR.  **$^1H$  NMR (500 MHz,  $CDCl_3$ )**  $\delta$  7.66 – 7.62 (m, 3H), 7.34 (d,  $J = 7.5$  Hz, 1H), 7.25 – 7.22 (m, 0.05H), 7.06 – 7.03 (m, 2H), 3.80 (s, 3H);  **$^{13}C$  NMR (125 MHz,  $CDCl_3$ )**  $\delta$  157.54, 134.54, 129.34, 128.91, 127.49, 126.69, 126.22, 123.54, 123.26 (t,  $J_{C-D} = 24.5$  Hz), 118.67, 105.70, 55.21; **HRMS** (ESI)  $m/z$  ( $[M+H]^+$ ) Calcd. for  $C_{11}H_{10}DO$  160.0867, found: 160.0871.

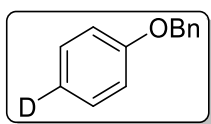

**1-(Benzyloxy)benzene-4-*d* (10)**<sup>1</sup>. The representative procedure was followed using 1-(benzyloxy)-4-chlorobenzene (43.74 mg, 0.20 mmol) and  $D_2O$  (18  $\mu L$ , 1.0 mmol). Isolation by column chromatography (*n*-hexane : EtOAc = 50 : 1) yielded **10** (30.4 mg, 82 %) as a colorless oil. 90 % Deuterium incorporation was determined by  $^1H$  NMR.  **$^1H$  NMR (500 MHz,  $CDCl_3$ )**  $\delta$  7.36 – 7.35 (m, 2H), 7.31 – 7.28 (m, 2H), 7.25 – 7.24 (m, 1H), 7.22 – 7.20 (m, 2H), 6.91 – 6.89 (m, 2H), 4.98 (s, 2H);  **$^{13}C$  NMR (125 MHz,  $CDCl_3$ )**  $\delta$  158.73, 137.02, 129.34, 128.54, 127.90, 127.45, 120.62 (t,  $J_{C-D} = 24.5$  Hz), 114.78, 69.85; **HRMS** (ESI)  $m/z$  ( $[M+H]^+$ ) Calcd. for  $C_{13}H_{12}DO$  186.1024, found: 186.1031.

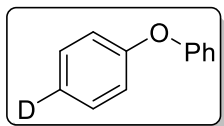

**1-Phenoxybenzene-4-*d* (11)**<sup>1</sup>. The representative procedure was followed using 1-chloro-4-phenoxybenzene (40.93 mg, 0.20 mmol) and D<sub>2</sub>O (18 μL, 1.0 mmol). Isolation by column chromatography (*n*-hexane : EtOAc = 50 : 1) yielded **11** (27.7 mg, 81 %) as a colorless oil. 95 % Deuterium incorporation was determined by <sup>1</sup>H NMR. **<sup>1</sup>H NMR (500 MHz, CDCl<sub>3</sub>)** δ 7.27 – 7.23 (m, 4H), 7.03 – 7.00 (m, 1.05H), 6.94 – 6.92 (m, 4H); **<sup>13</sup>C NMR (125 MHz, CDCl<sub>3</sub>)** δ 157.23, 129.70, 129.59, 123.18, 122.91 (t, *J*<sub>C-D</sub> = 24.5 Hz), 118.86; **HRMS (ESI) *m/z* ([M+H]<sup>+</sup>)** Calcd. for C<sub>12</sub>H<sub>10</sub>DO 172.0867, found: 172.0870.

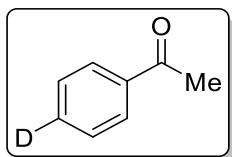

**1-(Phenyl-4-*d*)ethan-1-one (12)**<sup>4</sup>. The representative procedure was followed using 1-(4-chlorophenyl)ethan-1-one (30.92 mg, 0.20 mmol) and D<sub>2</sub>O (18 μL, 1.0 mmol). Isolation by column chromatography (*n*-hexane : EtOAc = 100 : 1) yielded **12** (20.8 mg, 86 %) as a colorless oil. More than 99 % Deuterium incorporation was determined by <sup>1</sup>H NMR. **<sup>1</sup>H NMR (500 MHz, CDCl<sub>3</sub>)** δ 7.97 – 7.96 (m, 2H), 7.48 – 7.46 (m, 2H), 2.61(s, 3H); **<sup>13</sup>C NMR (125 MHz, CDCl<sub>3</sub>)** δ 198.14, 137.07, 132.77 (t, *J*<sub>C-D</sub> = 24.5 Hz), 128.42, 128.27, 26.60; **HRMS (ESI) *m/z* ([M+H]<sup>+</sup>)** Calcd. for C<sub>8</sub>H<sub>8</sub>DO 122.0711, found: 122.0713.

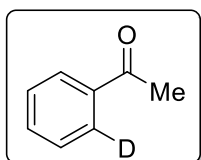

**1-(Phenyl-2-*d*)ethan-1-one (13)**<sup>4</sup>. The representative procedure was followed using 1-(4-chlorophenyl)ethan-1-one (30.92 mg, 0.20 mmol) and D<sub>2</sub>O (18 μL, 1.0 mmol). Isolation by column chromatography (*n*-hexane : EtOAc = 100 : 1) yielded **13** (16.7 mg,

69 %) as a colorless oil. 95 % Deuterium incorporation was determined by  $^1\text{H}$  NMR.  **$^1\text{H}$  NMR (500 MHz,  $\text{CDCl}_3$ )**  $\delta$  7.97 – 7.96 (m, 1.05H), 7.59 – 7.56 (m, 1H), 7.49 – 7.45 (m, 2H), 2.61(s, 2.41H);  **$^{13}\text{C}$  NMR (125 MHz,  $\text{CDCl}_3$ )**  $\delta$  198.13, 137.04, 133.08, 128.55, 128.43, 128.26, 128.01 (t,  $J_{\text{C-D}} = 24.5$  Hz), 26.60; **HRMS (ESI)**  $m/z$  ( $[\text{M}+\text{H}]^+$ ) Calcd. for  $\text{C}_8\text{H}_8\text{DO}$  122.0711, found: 122.07018.

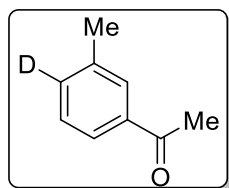

**1-(3-Methylphenyl-4-d)ethan-1-one (14).** The representative procedure was followed using 1-(4-chloro-3-methylphenyl)ethan-1-one (33.72 mg, 0.20 mmol) and  $\text{D}_2\text{O}$  (18  $\mu\text{L}$ , 1.0 mmol). Isolation by column chromatography ( $n$ -hexane : EtOAc = 100 : 1) yielded **14** (25.4 mg, 94 %) as a colorless oil. More than 99 % Deuterium incorporation was determined by  $^1\text{H}$  NMR.  **$^1\text{H}$  NMR (500 MHz,  $\text{CDCl}_3$ )**  $\delta$  7.69 – 7.66 (m, 2H), 7.27 – 7.25 (m, 1H), 2.50 (s, 3H), 2.32 (s, 3H);  **$^{13}\text{C}$  NMR (125 MHz,  $\text{CDCl}_3$ )**  $\delta$  198.33, 138.16, 137.03, 133.45 (t,  $J_{\text{C-D}} = 24.5$  Hz), 128.70, 128.24, 125.49, 26.60, 21.19; **HRMS (ESI)**  $m/z$  ( $[\text{M}+\text{H}]^+$ ) Calcd. for  $\text{C}_9\text{H}_{10}\text{DO}$  136.0867, found: 136.0870.

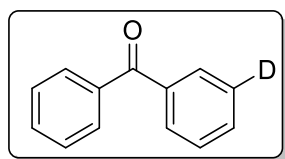

**Phenyl(phenyl-3-d)methanone (15).** The representative procedure was followed using (3-chlorophenyl)(phenyl)methanone (43.33 mg, 0.20 mmol) and  $\text{D}_2\text{O}$  (18  $\mu\text{L}$ , 1.0 mmol). Isolation by column chromatography ( $n$ -hexane : EtOAc = 100 : 1) yielded **15** (27.9 mg, 76 %) as a white solid. 84 % Deuterium incorporation was determined by  $^1\text{H}$  NMR.  **$^1\text{H}$  NMR (500 MHz,  $\text{CDCl}_3$ )**  $\delta$  7.75 – 7.72 (m, 4H), 7.53 – 7.50 (m, 2H), 7.43 – 7.30 (m, 3.16H);  **$^{13}\text{C}$  NMR (125 MHz,  $\text{CDCl}_3$ )**  $\delta$  196.73, 137.57, 132.39, 132.28, 130.03, 129.93, 128.25, 127.96 (t,  $J_{\text{C-D}} = 24.5$  Hz); **HRMS (ESI)**  $m/z$  ( $[\text{M}+\text{H}]^+$ ) Calcd. for  $\text{C}_{13}\text{H}_{10}\text{DO}$  184.0867, found: 184.0873.

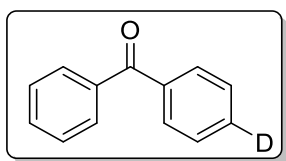

**Phenyl(phenyl-4-*d*)methanone (16)**<sup>5</sup>. The representative procedure was followed using (4-chlorophenyl)(phenyl)methanone (43.33 mg, 0.20 mmol) and D<sub>2</sub>O (18 μL, 1.0 mmol). Isolation by column chromatography (*n*-hexane : EtOAc = 100 : 1) yielded **16** (34.4 mg, 94 %) as a white solid. 96 % Deuterium incorporation was determined by <sup>1</sup>H NMR. <sup>1</sup>H NMR (500 MHz, CDCl<sub>3</sub>) δ 7.74 – 7.73 (m, 4H), 7.54 – 7.50 (m, 1.04H), 7.43 – 7.40 (m, 4H); <sup>13</sup>C NMR (125 MHz, CDCl<sub>3</sub>) δ 196.74, 137.57, 132.39, 132.09 (t, *J*<sub>C-D</sub> = 25.0 Hz), 130.04, 128.25, 128.14; HRMS (ESI) *m/z* ([M+H]<sup>+</sup>) Calcd. for C<sub>13</sub>H<sub>10</sub>DO 184.0867, found: 184.0869.

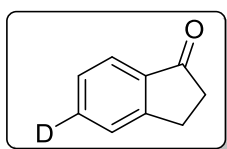

**2,3-Dihydro-1*H*-inden-1-one-5-*d* (17)**. The representative procedure was followed using 5-chloro-2,3-dihydro-1*H*-inden-1-one (33.32 mg, 0.20 mmol) and D<sub>2</sub>O (18 μL, 1.0 mmol). Isolation by column chromatography (*n*-hexane : EtOAc = 30 : 1) yielded **17** (24.5 mg, 92 %) as a white solid. 91 % Deuterium incorporation was determined by <sup>1</sup>H NMR. <sup>1</sup>H NMR (500 MHz, CDCl<sub>3</sub>) δ 7.76 (d, *J* = 7.5 Hz, 1H), 7.59 (t, *J* = 7.5 Hz, 0.09H), 7.48 (s, 1H), 7.37 (d, *J* = 7.5 Hz, 1H), 3.16 – 3.14 (m, 2H), 2.71 – 2.58 (m, 2H); <sup>13</sup>C NMR (125 MHz, CDCl<sub>3</sub>) δ 207.02, 155.12, 137.06, 134.25 (t, *J*<sub>C-D</sub> = 24.0 Hz), 127.13, 126.55, 123.68, 36.19, 25.77; HRMS (ESI) *m/z* ([M+H]<sup>+</sup>) Calcd. for C<sub>9</sub>H<sub>8</sub>DO 134.0711, found: 134.0716.

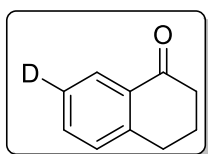

**2,3-Dihydro-1*H*-inden-1-one-5-*d* (18)**. The representative procedure was followed using 5-chloro-2,3-dihydro-1*H*-inden-1-one (36.1 mg, 0.20 mmol) and D<sub>2</sub>O (18 μL, 1.0

mmol). Isolation by column chromatography (*n*-hexane : EtOAc = 30 : 1) yielded **18** (20.9 mg, 71 %) as a white solid. 89 % Deuterium incorporation was determined by  $^1\text{H}$  NMR.  **$^1\text{H}$  NMR (500 MHz,  $\text{CDCl}_3$ )**  $\delta$  7.95 (d,  $J$  = 7.5 Hz, 1H), 7.38 (t,  $J$  = 7.5 Hz, 0.11H), 7.21 (d,  $J$  = 7.5 Hz, 1H), 7.16 (s, 1H), 2.88 (t,  $J$  = 6.0 Hz, 2H), 2.57 (t,  $J$  = 6.0 Hz, 2H), 2.07 – 2.04 (m, 2H);  **$^{13}\text{C}$  NMR (125 MHz,  $\text{CDCl}_3$ )**  $\delta$  198.27, 144.40, 133.30, 132.99 (t,  $J_{\text{C-D}}$  = 24.0 Hz), 132.53, 128.58, 127.06, 126.41, 39.08, 29.62, 23.21, 23.12; **HRMS** (ESI)  $m/z$  ( $[\text{M}+\text{H}]^+$ ) Calcd. for  $\text{C}_{10}\text{H}_{10}\text{DO}$  148.0867, found: 148.0861.

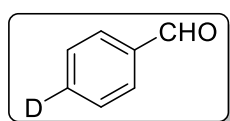

**Benzaldehyde-4-*d* (19)**<sup>6</sup>. The representative procedure was followed using 4-chlorobenzaldehyde (28.11 mg, 0.20 mmol) and  $\text{D}_2\text{O}$  (18  $\mu\text{L}$ , 1.0 mmol). Isolation by column chromatography (*n*-hexane : EtOAc = 20 : 1) yielded **19** (18.6 mg, 87 %) as a colorless oil. 99 % Deuterium incorporation was determined by  $^1\text{H}$  NMR.  **$^1\text{H}$  NMR (500 MHz,  $\text{CDCl}_3$ )**  $\delta$  10.03 (s, 1H), 7.89 (d,  $J$  = 8.0 Hz, 2H), 7.55 (d,  $J$  = 8.0 Hz, 2H);  **$^{13}\text{C}$  NMR (125 MHz,  $\text{CDCl}_3$ )**  $\delta$  192.38, 136.39, 134.45 (t,  $J_{\text{C-D}}$  = 25.0 Hz), 129.73, 128.87; **HRMS** (ESI)  $m/z$  ( $[\text{M}+\text{H}]^+$ ) Calcd. for  $\text{C}_7\text{H}_6\text{DO}$  108.0554, found: 108.0552.

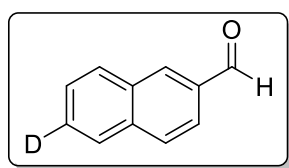

**2-Naphthaldehyde-6-*d* (20)**. The representative procedure was followed using 6-chloro-2-naphthaldehyde (38.13 mg, 0.20 mmol) and  $\text{D}_2\text{O}$  (18  $\mu\text{L}$ , 1.0 mmol). Isolation by column chromatography (*n*-hexane : EtOAc = 20 : 1) yielded **20** (20.4 mg, 65 %) as a white solid. 99 % Deuterium incorporation was determined by  $^1\text{H}$  NMR.  **$^1\text{H}$  NMR (500 MHz,  $\text{CDCl}_3$ )**  $\delta$  10.10 (s, 1H), 8.28 (s, 1H), 7.94 (d,  $J$  = 8.5 Hz, 1H), 7.89 – 7.88 (m, 2H), 7.84 (s, 1H), 7.52 (d,  $J$  = 8.5 Hz, 1H);  **$^{13}\text{C}$  NMR (125 MHz,  $\text{CDCl}_3$ )**  $\delta$  192.22, 136.46, 134.52, 134.13, 132.66, 129.52, 129.10, 127.96, 126.98, 122.78; **HRMS** (ESI)  $m/z$  ( $[\text{M}+\text{H}]^+$ ) Calcd. for  $\text{C}_{11}\text{H}_8\text{DO}$  158.0711, found: 158.0710.

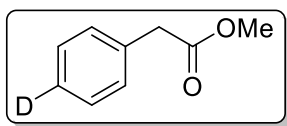

**Methyl 2-(phenyl-4-*d*)acetate (21).** The representative procedure was followed using methyl 2-(4-chlorophenyl)acetate (36.92 mg, 0.20 mmol) and D<sub>2</sub>O (18 μL, 1.0 mmol). Isolation by column chromatography (*n*-hexane : EtOAc = 100 : 1) yielded **21** (25.1 mg, 83 %) as a green-yellow oil. 99 % Deuterium incorporation was determined by <sup>1</sup>H NMR. **<sup>1</sup>H NMR (500 MHz, CDCl<sub>3</sub>)** δ 7.24 (d, *J* = 8.0 Hz, 2H), 7.19 (s, *J* = 8.0 Hz, 2H), 3.60 (s, 3H), 3.55 (s, 2H); **<sup>13</sup>C NMR (125 MHz, CDCl<sub>3</sub>)** δ 171.96, 133.91, 129.18, 128.40, 126.75 (t, *J*<sub>C-D</sub> = 24.5 Hz), 51.97, 41.14; **HRMS (ESI)** *m/z* ([*M*+*H*]<sup>+</sup>) Calcd. for C<sub>9</sub>H<sub>10</sub>DO<sub>2</sub> 152.0816, found: 152.0817.

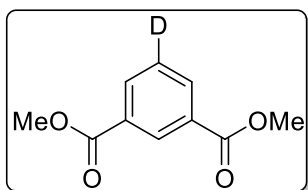

**Dimethyl isophthalate-5-*d* (22)**<sup>7</sup>. The representative procedure was followed using dimethyl 5-chloroisophthalate (45.70 mg, 0.20 mmol) and D<sub>2</sub>O (18 μL, 1.0 mmol). Isolation by column chromatography (*n*-hexane : EtOAc = 50 : 1) yielded **22** (29.3 mg, 75 %) as a colorless oil. 96 % Deuterium incorporation was determined by <sup>1</sup>H NMR. **<sup>1</sup>H NMR (500 MHz, CDCl<sub>3</sub>)** δ 8.61 – 8.60 (m, 1H), 8.15 – 8.14 (m, 2H), 7.45 (t, *J* = 7.5 Hz, 0.04 H), 3.87 (s, 6H); **<sup>13</sup>C NMR (125 MHz, CDCl<sub>3</sub>)** δ 166.16, 133.63, 130.62, 130.46, 128.28 (t, *J*<sub>C-D</sub> = 27.0 Hz), 52.32; **HRMS (ESI)** *m/z* ([*M*+*H*]<sup>+</sup>) Calcd. for C<sub>10</sub>H<sub>10</sub>DO<sub>4</sub> 196.0715, found: 196.0719.

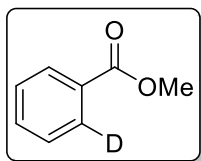

**Methyl benzoate-2-*d* (23)**<sup>8</sup>. The representative procedure was followed using methyl

2-chlorobenzoate (34.12 mg, 0.20 mmol) and D<sub>2</sub>O (18 μL, 1.0 mmol). Isolation by column chromatography (*n*-hexane : EtOAc = 100 : 1) yielded **23** (23.3 mg, 85 %) as a colorless oil. 98 % Deuterium incorporation was determined by <sup>1</sup>H NMR. **<sup>1</sup>H NMR (500 MHz, CDCl<sub>3</sub>)** δ 7.99 – 7.96 (m, 1H), 7.50 – 7.46 (m, 1H), 7.38 – 7.35 (m, 2H), 3.84 (s, 3H); **<sup>13</sup>C NMR (125 MHz, CDCl<sub>3</sub>)** δ 167.06, 132.87, 130.01, 129.51, 129.24 (t, *J*<sub>C-D</sub> = 24.5 Hz), 128.31, 128.19, 52.06; **HRMS (ESI)** *m/z* ([*M*+*H*]<sup>+</sup>) Calcd. for C<sub>8</sub>H<sub>8</sub>DO<sub>2</sub> 138.0660, found: 138.0668.

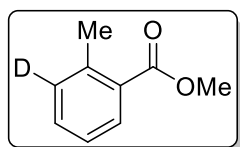

**Methyl 2-methylbenzoate-3-*d* (24)**. The representative procedure was followed using methyl 3-chloro-2-methylbenzoate (36.8 mg, 0.20 mmol) and D<sub>2</sub>O (18 μL, 1.0 mmol). Isolation by column chromatography (*n*-hexane : EtOAc = 100 : 1) yielded **24** (27.2 mg, 90 %) as a colorless oil. More than 99 % Deuterium incorporation was determined by <sup>1</sup>H NMR. **<sup>1</sup>H NMR (500 MHz, CDCl<sub>3</sub>)** δ 7.82 (d, *J* = 7.5 Hz, 1H), 7.30 (d, *J* = 7.5 Hz, 1H), 7.15 (t, *J* = 7.5 Hz, 1H), 3.80 (s, 3H), 2.51 (s, 3H); **<sup>13</sup>C NMR (125 MHz, CDCl<sub>3</sub>)** δ 167.00, 140.03, 131.77, 131.29 (t, *J*<sub>C-D</sub> = 24.5 Hz), 130.50, 129.50, 125.61, 51.71, 21.58; **HRMS (ESI)** *m/z* ([*M*+*H*]<sup>+</sup>) Calcd. for C<sub>9</sub>H<sub>10</sub>DO<sub>2</sub> 152.0816, found: 152.0824.

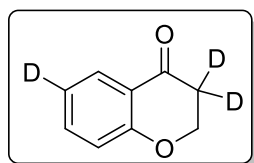

**Chroman-4-one-3,3,6-*d*<sub>3</sub> (25)**. The representative procedure was followed using 6-chlorochroman-4-one (36.52 mg, 0.20 mmol) and D<sub>2</sub>O (18 μL, 1.0 mmol). Isolation by column chromatography (*n*-hexane : EtOAc = 50 : 1) yielded **25** (22.9 mg, 77 %) as a colorless oil. 95 % Deuterium incorporation was determined by <sup>1</sup>H NMR. **<sup>1</sup>H NMR (500 MHz, CDCl<sub>3</sub>)** δ 7.81 (s, 1H), 7.39 (d, *J* = 7.5 Hz, 1H), 6.94 (t, *J* = 7.5 Hz, 0.05H), 6.89 (d, *J* = 8.5 Hz, 1H), 4.45 (s, 2H), 2.74 – 2.71 (m, 0.32H); **<sup>13</sup>C NMR (125 MHz, CDCl<sub>3</sub>)** δ 191.83, 161.81, 135.81, 126.94, 121.28, 121.02 (t, *J*<sub>C-D</sub> = 24.5 Hz), 117.81,

66.85, 37.30 (hexet,  $J_{C-D} = 20.0$  Hz); **HRMS** (ESI)  $m/z$  ( $[M+H]^+$ ) Calcd. for  $C_9H_6D_3O_2$  152.0785, found: 152.0779.

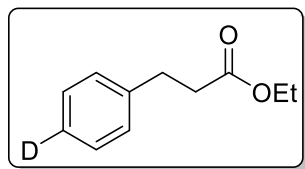

**Ethyl 3-(phenyl-4-*d*)propanoate (26).** The representative procedure was followed using ethyl 3-(4-chlorophenyl)propanoate (42.5 mg, 0.20 mmol) and  $D_2O$  (18  $\mu L$ , 1.0 mmol). Isolation by column chromatography (*n*-hexane : EtOAc = 50 : 1) yielded **26** (29.4 mg, 82 %) as a colorless oil. More than 99 % Deuterium incorporation was determined by  $^1H$  NMR.  **$^1H$  NMR (500 MHz,  $CDCl_3$ )**  $\delta$  7.20 (d,  $J = 7.5$  Hz, 2H), 7.12 (d,  $J = 7.5$  Hz, 2H), 4.04 (q,  $J = 7.0$  Hz, 2H), 2.87 (t,  $J = 7.5$  Hz, 2H), 2.54 (t,  $J = 7.5$  Hz, 2H), 1.15 (t,  $J = 7.5$  Hz, 3H);  **$^{13}C$  NMR (125 MHz,  $CDCl_3$ )**  $\delta$  172.83, 140.51, 128.29, 128.22, 125.86 (t,  $J_{C-D} = 24.5$  Hz), 60.33, 35.89, 30.92, 14.14; **HRMS** (ESI)  $m/z$  ( $[M+H]^+$ ) Calcd. for  $C_{11}H_{14}DO_2$  180.1129, found: 180.1130.

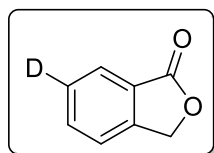

**Isobenzofuran-1(3*H*)-one-6-*d* (27).** The representative procedure was followed using 6-chloroisobenzofuran-1(3*H*)-one (33.7 mg, 0.20 mmol) and  $D_2O$  (18  $\mu L$ , 1.0 mmol). Isolation by column chromatography (*n*-hexane : EtOAc = 50 : 1) yielded **27** (21.8 mg, 81 %) as a colorless oil. More than 99 % Deuterium incorporation was determined by  $^1H$  NMR.  **$^1H$  NMR (500 MHz,  $CDCl_3$ )**  $\delta$  7.85 (s, 1H), 7.62 (d,  $J = 7.5$  Hz, 1H), 7.44 (d,  $J = 7.5$  Hz, 1H), 5.25 (s, 2H);  **$^{13}C$  NMR (125 MHz,  $CDCl_3$ )**  $\delta$  171.03, 146.47, 133.85, 128.68 (t,  $J_{C-D} = 24.5$  Hz), 125.56, 122.05, 69.60; **HRMS** (ESI)  $m/z$  ( $[M+H]^+$ ) Calcd. for  $C_8H_6DO_2$  136.0503, found: 136.0504.

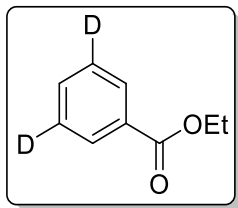

**Ethyl benzoate-3,5-*d*<sub>2</sub> (28).** The representative procedure was followed using methyl ethyl 3,5-dichlorobenzoate (43.80 mg, 0.20 mmol) and D<sub>2</sub>O (36 μL, 2.0 mmol). Isolation by column chromatography (*n*-hexane : EtOAc = 100 : 1) yielded **28** (24.4 mg, 80 %) as a yellow oil. 99 % Deuterium incorporation was determined by <sup>1</sup>H NMR. **<sup>1</sup>H NMR (500 MHz, CDCl<sub>3</sub>)** δ 8.51 (s, 2H), 7.55 (s, 1H), 4.38 (q, *J* = 7.0 Hz, 2H), 1.40 (t, *J* = 7.0 Hz, 3H); **<sup>13</sup>C NMR (125 MHz, CDCl<sub>3</sub>)** δ 166.60, 132.54, 130.46, 129.38, 127.97 (t, *J*<sub>C-D</sub> = 24.0Hz), 60.91, 14.30; **HRMS (ESI)** *m/z* ([*M*+*H*]<sup>+</sup>) Calcd. for C<sub>9</sub>H<sub>9</sub>D<sub>2</sub>O<sub>2</sub> 153.0879, found: 153.0886.

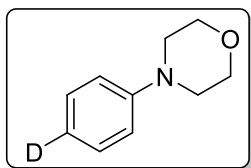

**4-(Phenyl-4-*d*)morpholine (29)**<sup>9</sup>. The representative procedure was followed using 4-(4-chlorophenyl)morpholine (46.34 mg, 0.20 mmol) and D<sub>2</sub>O (18 μL, 1.0 mmol). Isolation by column chromatography (*n*-hexane : EtOAc = 10 : 1) yielded **29** (29.6 mg, 90 %) as a colorless oil. 99 % Deuterium incorporation was determined by <sup>1</sup>H NMR. **<sup>1</sup>H NMR (500 MHz, CDCl<sub>3</sub>)** δ 7.29 (d, *J* = 8.5 Hz, 2H), 6.92 (d, *J* = 8.5 Hz, 2H), 3.87 – 3.85 (m, 4H), 3.16 – 3.15 (m, 4H); **<sup>13</sup>C NMR (125 MHz, CDCl<sub>3</sub>)** δ 151.23, 129.04, 119.75 (t, *J*<sub>C-D</sub> = 24.5 Hz), 115.67, 66.91, 49.34; **HRMS (ESI)** *m/z* ([*M*+*H*]<sup>+</sup>) Calcd. for C<sub>10</sub>H<sub>13</sub>DNO 165.1133, found: 165.1130.

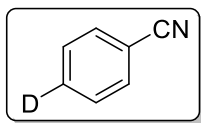

**Benzonitrile-4-*d* (30)**<sup>10</sup>. The representative procedure was followed using 4-chlorobenzonitrile (27.51 mg, 0.20 mmol) and D<sub>2</sub>O (18 μL, 1.0 mmol). Isolation by

column chromatography (*n*-hexane : EtOAc = 20 : 1) yielded **30** (16.9 mg, 81 %) as a colorless oil. 90 % Deuterium incorporation was determined by  $^1\text{H}$  NMR.  $^1\text{H}$  NMR (500 MHz,  $\text{CDCl}_3$ )  $\delta$  7.67 (d,  $J$  = 8.0 Hz, 2H), 7.61 (d,  $J$  = 8.0 Hz, 0.1H), 7.48 (d,  $J$  = 8.0 Hz, 2H);  $^{13}\text{C}$  NMR (125 MHz,  $\text{CDCl}_3$ )  $\delta$  132.64 (t,  $J_{\text{C-D}}$  = 24.5 Hz), 132.13, 128.98, 118.83, 112.43; HRMS (ESI)  $m/z$  ( $[\text{M}+\text{H}]^+$ ) Calcd. for  $\text{C}_7\text{H}_5\text{DN}$  105.0558, found: 105.0564.

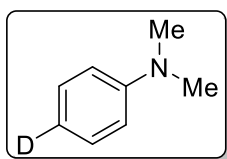

***N,N*-dimethylaniline-4-*d* (31)**<sup>11</sup>. The representative procedure was followed using 4-chloro-*N,N*-dimethylaniline (31.13 mg, 0.20 mmol) and  $\text{D}_2\text{O}$  (18  $\mu\text{L}$ , 1.0 mmol). Isolation by column chromatography (*n*-hexane : EtOAc = 50 : 1) yielded **31** (21.7 mg, 89 %) as a colorless oil. 99 % Deuterium incorporation was determined by  $^1\text{H}$  NMR.  $^1\text{H}$  NMR (500 MHz,  $\text{CDCl}_3$ )  $\delta$  7.24 (m, 2H), 6.75 (m, 2H), 2.94 (s, 6H);  $^{13}\text{C}$  NMR (125 MHz,  $\text{CDCl}_3$ )  $\delta$  150.58, 128.92, 116.63, 112.64, 40.62; HRMS (ESI)  $m/z$  ( $[\text{M}+\text{H}]^+$ ) Calcd. for  $\text{C}_8\text{H}_{11}\text{DN}$  123.1027, found: 123.1020.

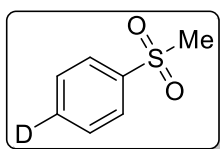

**1-(Methylsulfonyl)benzene-4-*d* (32)**<sup>10</sup>. The representative procedure was followed using 1-chloro-4-(methylsulfonyl)benzene (38.13 mg, 0.20 mmol) and  $\text{D}_2\text{O}$  (18  $\mu\text{L}$ , 1.0 mmol). Isolation by column chromatography (*n*-hexane : EtOAc = 50 : 1) yielded **32** (27.4 mg, 87 %) as an orange oil. 96 % Deuterium incorporation was determined by  $^1\text{H}$  NMR.  $^1\text{H}$  NMR (500 MHz,  $\text{CDCl}_3$ )  $\delta$  7.88 (d,  $J$  = 7.5 Hz, 2H), 7.51 (d,  $J$  = 7.5 Hz, 2H), 3.00 (s, 3H);  $^{13}\text{C}$  NMR (125 MHz,  $\text{CDCl}_3$ )  $\delta$  140.38, 133.37 (t,  $J_{\text{C-D}}$  = 24.5 Hz), 129.20, 127.26, 44.42; HRMS (ESI)  $m/z$  ( $[\text{M}+\text{H}]^+$ ) Calcd. for  $\text{C}_7\text{H}_8\text{DO}_2\text{S}$  158.0381, found: 158.0384.

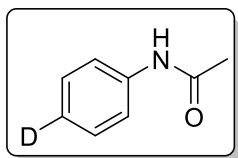

***N*-(Phenyl-4-*d*)acetamide (33)**<sup>11</sup>. The representative procedure was followed using *N*-(4-chlorophenyl)acetamide (33.92 mg, 0.20 mmol) and D<sub>2</sub>O (18 μL, 1.0 mmol). Isolation by column chromatography (*n*-hexane : EtOAc = 5 : 1) yielded **33** (22.3 mg, 82 %) as a white solid. 99 % Deuterium incorporation was determined by <sup>1</sup>H NMR. **<sup>1</sup>H NMR (500 MHz, CDCl<sub>3</sub>)** δ 7.51 (br, 0.89H), 7.42 (d, *J* = 7.5 Hz, 2H), 7.23 (t, *J* = 7.5 Hz, 2H), 2.09 (s, 3H); **<sup>13</sup>C NMR (125 MHz, CDCl<sub>3</sub>)** δ 168.49, 137.89, 128.80, 123.98 (t, *J*<sub>C-D</sub> = 24.0 Hz), 119.92, 24.50; **HRMS (ESI)** *m/z* ([*M*+*H*]<sup>+</sup>) Calcd. for C<sub>8</sub>H<sub>9</sub>DNO 137.0820, found: 137.0816.

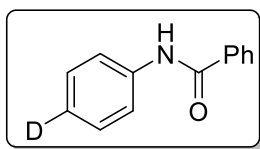

***N*-(Phenyl-4-*d*)benzamide (34)**<sup>11</sup>. The representative procedure was followed using *N*-(4-chlorophenyl)benzamide (46.34 mg, 0.20 mmol) and D<sub>2</sub>O (18 μL, 1.0 mmol). Isolation by column chromatography (*n*-hexane : EtOAc = 5 : 1) yielded **34** (33.7 mg, 85 %) as a white solid. 90 % Deuterium incorporation was determined by <sup>1</sup>H NMR. **<sup>1</sup>H NMR (500 MHz, DMSO-*d*<sub>6</sub>)** δ 10.26 (s, 1H), 7.97 (m, 2H), 7.79 (d, *J* = 8.0 Hz, 2H), 7.58 (t, *J* = 8.0 Hz, 1H), 7.52 (t, *J* = 8.0 Hz, 2H), 7.35 (d, *J* = 8.0 Hz, 2H), 7.10 (t, *J* = 8.0 Hz, 0.1H); **<sup>13</sup>C NMR (125 MHz, DMSO-*d*<sub>6</sub>)** δ 166.06, 139.67, 135.50, 132.03, 129.02 (t, *J*<sub>C-D</sub> = 25.0 Hz), 128.99, 128.87, 128.15, 120.85; **HRMS (ESI)** *m/z* ([*M*+*H*]<sup>+</sup>) Calcd. for C<sub>13</sub>H<sub>11</sub>DNO 199.0976, found: 199.0970.

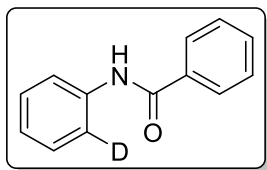

***N*-(Phenyl-2-*d*)benzamide (35)**. The representative procedure was followed using *N*-(2-chlorophenyl)benzamide (46.34 mg, 0.20 mmol) and D<sub>2</sub>O (18 μL, 1.0 mmol).

Isolation by column chromatography (*n*-hexane : EtOAc = 5 : 1) yielded **35** (31.7 mg, 80 %) as a white solid. 99 % Deuterium incorporation was determined by  $^1\text{H}$  NMR.  $^1\text{H}$  NMR (500 MHz, DMSO- $d_6$ )  $\delta$  10.25 (s, 1H), 7.98 – 7.96 (m, 2H), 7.71 – 7.79 (m, 1H), 7.61 – 7.58 (m, 1H), 7.55 – 7.52 (m, 2H), 7.38 – 7.35 (m, 2H), 7.12 – 7.09 (m, 1H);  $^{13}\text{C}$  NMR (125 MHz, DMSO- $d_6$ )  $\delta$  166.02, 139.58, 135.47, 131.97, 129.04, 128.94, 128.82, 128.11, 124.09, 120.81, 120.55 (t,  $J_{\text{C-D}}$  = 25.0 Hz); HRMS (ESI)  $m/z$  ( $[\text{M}+\text{H}]^+$ ) Calcd. for  $\text{C}_{13}\text{H}_{11}\text{DNO}$  199.0976, found: 199.0979.

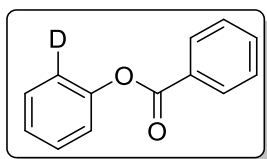

**Phenyl-2-*d* benzoate (36).** The representative procedure was followed using 2-chlorophenyl benzoate (46.53 mg, 0.20 mmol) and  $\text{D}_2\text{O}$  (18  $\mu\text{L}$ , 1.0 mmol). Isolation by column chromatography (*n*-hexane : EtOAc = 5 : 1) yielded **36** (35.5 mg, 89 %) as a white solid. More than 99% Deuterium incorporation was determined by  $^1\text{H}$  NMR.  $^1\text{H}$  NMR (500 MHz,  $\text{CDCl}_3$ )  $\delta$  8.21 – 8.19 (m, 2H), 7.62 – 7.59 (m, 1H), 7.50 – 7.47 (m, 2H), 7.43 – 7.39 (m, 2H), 7.27 – 7.23 (m, 1H), 7.22 – 7.20 (m, 1H);  $^{13}\text{C}$  NMR (125 MHz,  $\text{CDCl}_3$ )  $\delta$  165.07, 150.88, 133.48, 130.08, 129.54, 129.40, 129.30, 128.49, 125.79, 121.63, 121.37 (t,  $J_{\text{C-D}}$  = 25.0 Hz); HRMS (ESI)  $m/z$  ( $[\text{M}+\text{H}]^+$ ) Calcd. for  $\text{C}_{13}\text{H}_{10}\text{DO}_2$  200.0816, found: 200.0821.

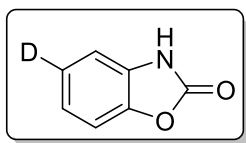

**Benzo[*d*]oxazol-2(3*H*)-one-5-*d* (37).** The representative procedure was followed using 5-chlorobenzo[*d*]oxazol-2(3*H*)-one (33.91 mg, 0.20 mmol) and  $\text{D}_2\text{O}$  (18  $\mu\text{L}$ , 1.0 mmol). Isolation by column chromatography (*n*-hexane : EtOAc = 5 : 1) yielded **37** (18.7 mg, 69 %) as a white solid. 99 % Deuterium incorporation was determined by  $^1\text{H}$  NMR.  $^1\text{H}$  NMR (500 MHz, DMSO- $d_6$ )  $\delta$  11.84 (s, 1H), 7.32 – 7.27 (m, 1H), 7.16 – 7.09 (m, 2H);  $^{13}\text{C}$  NMR (125 MHz, DMSO- $d_6$ )  $\delta$  154.70, 142.57, 132.15, 128.21, 121.97, 111.26,

110.10 (t,  $J_{C-D} = 22.0$  Hz); **HRMS** (ESI)  $m/z$  ( $[M+H]^+$ ) Calcd. for  $C_7H_5DNO_2$  137.0456, found: 137.0454.

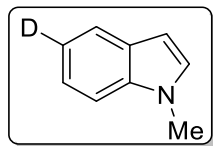

**1-Methyl-1H-indole-5-d (38)**<sup>12</sup>. The representative procedure was followed using 5-chloro-1-methyl-1H-indole (33.12 mg, 0.20 mmol) and  $D_2O$  (18  $\mu$ L, 1.0 mmol). Isolation by column chromatography (*n*-hexane : EtOAc = 30 : 1) yielded **38** (23.8 mg, 90 %) as a green-yellow liquid. More than 99 % Deuterium incorporation was determined by  $^1H$  NMR.  **$^1H$  NMR (500 MHz,  $CDCl_3$ )**  $\delta$  7.56 – 7.54 (m, 1H), 7.25 – 7.23 (m, 1H), 7.15 – 7.13 (m, 1H), 6.96 (d,  $J = 7.0$  Hz, 1H), 6.41 (d,  $J = 7.0$  Hz, 1H), 3.70 (s, 3H);  **$^{13}C$  NMR (125 MHz,  $CDCl_3$ )**  $\delta$  136.65, 128.72, 128.42, 121.33, 120.70, 118.94 (t,  $J_{C-D} = 24.5$ Hz), 109.12, 100.84, 32.76; **HRMS** (ESI)  $m/z$  ( $[M+H]^+$ ) Calcd. for  $C_9H_9DN$  133.0871, found: 133.0877.

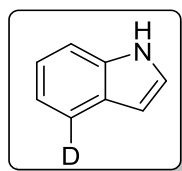

**1H-Indole-4-d (39)**<sup>12</sup>. The representative procedure was followed using 4-chloro-1H-indole (30.32 mg, 0.20 mmol) and  $D_2O$  (18  $\mu$ L, 1.0 mmol). Isolation by column chromatography (*n*-hexane : EtOAc = 20 : 1) yielded **39** (16.5 mg, 70 %) as a yellow oil. 85 % Deuterium incorporation was determined by  $^1H$  NMR.  **$^1H$  NMR (500 MHz,  $CDCl_3$ )**  $\delta$  7.81 (br, 0.92H), 7.56 (d,  $J = 8.0$  Hz, 0.15H), 7.22 (d,  $J = 8.0$  Hz, 1H), 7.12 – 7.09 (m, 1H), 7.04 – 7.03 (m, 1H), 7.01 – 6.99 (m, 1H), 6.45 – 6.44 (m, 1H);  **$^{13}C$  NMR (125 MHz,  $CDCl_3$ )**  $\delta$  135.68, 127.66, 124.11, 121.90, 120.66, 120.37 (t,  $J_{C-D} = 25.5$  Hz), 119.74, 119.62; **HRMS** (ESI)  $m/z$  ( $[M+H]^+$ ) Calcd. for  $C_8H_7DN$  119.0714, found: 119.0723.

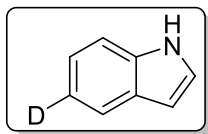

**1H-Indole-5-d (40)**<sup>12</sup>. The representative procedure was followed using 5-chloro-1H-indole (30.32 mg, 0.20 mmol) and D<sub>2</sub>O (18  $\mu$ L, 1.0 mmol). Isolation by column chromatography (*n*-hexane : EtOAc = 20 : 1) yielded **40** (17.0 mg, 72 %) as a yellow oil. 87 % Deuterium incorporation was determined by <sup>1</sup>H NMR. **<sup>1</sup>H NMR (500 MHz, CDCl<sub>3</sub>)**  $\delta$  7.83 (br, 0.93H), 7.56 (s, 1H) 7.23 (d, *J* = 8.0 Hz, 1H), 7.10 (d, *J* = 8.0 Hz, 1H), 7.05 – 7.04 (m, 0.13H), 7.02 – 7.00 (m, 1H), 6.55 – 6.54 (m, 1H); **<sup>13</sup>C NMR (125 MHz, CDCl<sub>3</sub>)**  $\delta$  135.69, 127.64, 124.10, 121.64 (t, *J*<sub>C-D</sub> = 25.0 Hz), 120.67, 119.04, 110.88, 102.52; **HRMS (ESI)** *m/z* ([M+H]<sup>+</sup>) Calcd. for C<sub>8</sub>H<sub>7</sub>DN 119.0714, found: 119.0721.

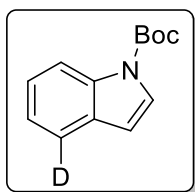

**tert-Butyl 1H-indole-1-carboxylate-4-d (41)**<sup>12</sup>. The representative procedure was followed using *tert*-butyl 4-chloro-1H-indole-1-carboxylate (50.34 mg, 0.20 mmol) and D<sub>2</sub>O (18  $\mu$ L, 1.0 mmol). Isolation by column chromatography (*n*-hexane : EtOAc = 20 : 1) yielded **41** (31.4 mg, 72 %) as a yellow oil. More than 99 % Deuterium incorporation was determined by <sup>1</sup>H NMR. **<sup>1</sup>H NMR (500 MHz, CDCl<sub>3</sub>)**  $\delta$  8.08 – 8.06 (m, 1H), 7.52 (d, *J* = 4.0 Hz, 1H) 7.24 (t, *J* = 8.0 Hz, 1H), 7.15 (d, *J* = 8.0 Hz, 1H), 6.50 (d, *J* = 4.0 Hz, 1H), 1.60 (s, 9H); **<sup>13</sup>C NMR (125 MHz, CDCl<sub>3</sub>)**  $\delta$  149.81, 135.17, 130.46, 125.87, 124.15, 122.48, 120.61 (t, *J*<sub>C-D</sub> = 24.0 Hz), 115.13, 107.21, 83.61, 28.21; **HRMS (ESI)** *m/z* ([M+H]<sup>+</sup>) Calcd. for C<sub>13</sub>H<sub>15</sub>DNO<sub>2</sub> 219.1238, found: 219.1239.

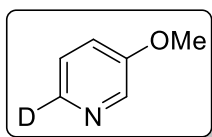

**3-Methoxypyridine-6-d (42)**<sup>12</sup>. The representative procedure was followed using 2-

chloro-5-methoxypyridine (28.71 mg, 0.20 mmol) and D<sub>2</sub>O (18  $\mu$ L, 1.0 mmol). Isolation by column chromatography (*n*-hexane : EtOAc = 20 : 1) yielded **42** (14.7 mg, 67 %) as a yellow oil. 99 % Deuterium incorporation was determined by <sup>1</sup>H NMR. **<sup>1</sup>H NMR (500 MHz, CDCl<sub>3</sub>)**  $\delta$  8.35 (s, 1H), 7.27 – 7.20 (m, 2H), 3.87 (s, 3H); **<sup>13</sup>C NMR (125 MHz, CDCl<sub>3</sub>)**  $\delta$  155.67, 141.77 (t,  $J_{C-D}$  = 27.5 Hz), 137.56, 123.63, 120.42, 55.47; **HRMS (ESI) m/z ([M+H]<sup>+</sup>)** Calcd. for C<sub>6</sub>H<sub>7</sub>DNO 111.0663, found: 111.0667.

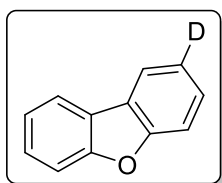

**Dibenzo[*b,d*]furan-2-*d* (43)**<sup>13</sup>. The representative procedure was followed using 2-chlorodibenzo[*b,d*]furan (40.53 mg, 0.20 mmol) and D<sub>2</sub>O (18  $\mu$ L, 1.0 mmol). Isolation by column chromatography (*n*-hexane : EtOAc = 100 : 1) yielded **43** (31.1 mg, 92 %) as a white solid. 97 % Deuterium incorporation was determined by <sup>1</sup>H NMR. **<sup>1</sup>H NMR (500 MHz, CDCl<sub>3</sub>)**  $\delta$  7.94 – 7.92 (m, 2H), 7.56 (d,  $J$  = 8.5 Hz, 2H), 7.45 – 7.42 (m, 2H), 7.32 (t,  $J$  = 8.5 Hz, 1H); **<sup>13</sup>C NMR (125 MHz, CDCl<sub>3</sub>)**  $\delta$  156.14, 127.08, 126.97, 124.19, 122.64, 122.36 (t,  $J_{C-D}$  = 24.5 Hz), 120.60, 120.49, 111.62; **HRMS (ESI) m/z ([M+H]<sup>+</sup>)** Calcd. for C<sub>12</sub>H<sub>8</sub>DO 170.0711, found: 170.0710.

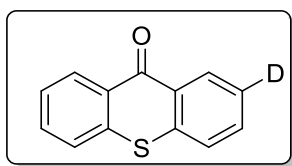

**9H-Thioxanthen-9-one-2-*d* (44)**. The representative procedure was followed using 2-chloro-9H-thioxanthen-9-one (49.34 mg, 0.20 mmol) and D<sub>2</sub>O (18  $\mu$ L, 1.0 mmol). Isolation by column chromatography (*n*-hexane : DCM = 1:1) yielded **44** (38.4 mg, 90 %) as a white solid. 90 % Deuterium incorporation was determined by <sup>1</sup>H NMR. **<sup>1</sup>H NMR (500 MHz, CDCl<sub>3</sub>)**  $\delta$  8.63 – 8.61 (m, 2H), 7.63 – 7.56 (m, 4H), 7.50 – 7.46 (m, 1.1H); **<sup>13</sup>C NMR (125 MHz, CDCl<sub>3</sub>)**  $\delta$  179.92, 137.23, 132.22, 132.12, 129.82, 129.71, 129.18, 126.26, 125.98 (t,  $J_{C-D}$  = 25.5 Hz), 125.94; **HRMS (ESI) m/z ([M+H]<sup>+</sup>)** Calcd. for C<sub>13</sub>H<sub>8</sub>DOS 214.0431, found: 214.0427.

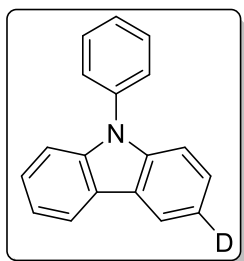

**9-Phenyl-9H-carbazole-3-*d* (45)**<sup>14</sup>. The representative procedure was followed using 3-chloro-9-phenyl-9H-carbazole (55.55 mg, 0.20 mmol) and D<sub>2</sub>O (18 μL, 1.0 mmol). Isolation by column chromatography (*n*-hexane : EtOAc = 200 : 1) yielded **45** (23.3 mg, 90 %) as a white solid. More than 99% Deuterium incorporation was determined by <sup>1</sup>H NMR. **<sup>1</sup>H NMR (500 MHz, CDCl<sub>3</sub>)** δ 8.11 – 8.10 (m, 2H), 7.51 – 7.50 (m, 4H), 7.36 – 7.35 (m, 5H), 7.25 – 7.22 (m, 1H); **<sup>13</sup>C NMR (125 MHz, CDCl<sub>3</sub>)** δ 140.86, 137.67, 129.77, 127.34, 127.06, 125.87, 125.76, 123.32, 120.24, 120.13, 119.86, 119.59 (t, *J*<sub>C-D</sub> = 24.0 Hz), 109.70; **HRMS (ESI)** *m/z* ([*M*+*H*]<sup>+</sup>) Calcd. for C<sub>18</sub>H<sub>13</sub>DN 245.1184, found: 245.1180.

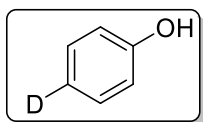

**Phen-4-*d*-ol (46)**<sup>6</sup>. The representative procedure was followed using 4-iodophenol (43.99 mg, 0.20 mmol) and D<sub>2</sub>O (36 μL, 2.0 mmol). Isolation by column chromatography (*n*-hexane : EtOAc = 50 : 1) yielded **46** (17.5 mg, 92 %) as a white solid. 85 % Deuterium incorporation was determined by <sup>1</sup>H NMR. **<sup>1</sup>H NMR (500 MHz, CDCl<sub>3</sub>)** δ 7.22 (d, *J* = 8.0 Hz, 2H), 6.92 (t, *J* = 8.0 Hz, 0.15H), 6.83 (d, *J* = 8.0 Hz, 2H), 5.76 – 5.71 (br, 1H); **<sup>13</sup>C NMR (125 MHz, CDCl<sub>3</sub>)** δ 155.29, 129.54, 120.79, 120.52 (t, *J*<sub>C-D</sub> = 25.5 Hz), 115.32; **HRMS (ESI)** *m/z* ([*M*+*H*]<sup>+</sup>) Calcd. for C<sub>6</sub>H<sub>6</sub>DO 96.0554, found: 96.0559.

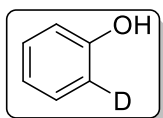

**Phen-2-*d*-ol (47).** The representative procedure was followed using 2-iodophenol (43.99 mg, 0.20 mmol) and D<sub>2</sub>O (36 μL, 2.0 mmol). Isolation by column chromatography (*n*-hexane : EtOAc = 50 : 1) yielded **47** (17.7 mg, 93 %) as a white solid. More than 99 % Deuterium incorporation was determined by <sup>1</sup>H NMR. **<sup>1</sup>H NMR (500 MHz, CDCl<sub>3</sub>)** δ 7.24 – 7.21 (m, 2H), 6.94 – 6.90 (m, 1H), 6.84 – 6.82 (m, 1H), 5.67 (br, 1H); **<sup>13</sup>C NMR (125 MHz, CDCl<sub>3</sub>)** δ 155.32, 129.63, 129.54, 120.75, 115.33, 115.06 (t, *J*<sub>C-D</sub> = 24.0 Hz); **HRMS (ESI) *m/z* ([M+H]<sup>+</sup>)** Calcd. for C<sub>6</sub>H<sub>6</sub>DO 96.0554, found: 96.0552.

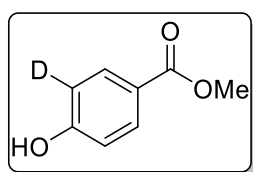

**Methyl 4-hydroxybenzoate-3-*d* (48).** The representative procedure was followed using methyl 4-hydroxy-3-iodobenzoate (55.61 mg, 0.20 mmol) and D<sub>2</sub>O (36 μL, 2.0 mmol). Isolation by column chromatography (*n*-hexane : EtOAc = 5 : 1) yielded **48** (26.6 mg, 87 %) as a colorless liquid. More than 99% Deuterium incorporation was determined by <sup>1</sup>H NMR. **<sup>1</sup>H NMR (500 MHz, CDCl<sub>3</sub>)** δ 7.88 – 7.86 (m, 2H), 6.83 – 6.81 (m, 1H), 6.73 (s, 1H), 3.82 (s, 3H); **<sup>13</sup>C NMR (125 MHz, CDCl<sub>3</sub>)** δ 167.58, 160.40, 131.93, 131.84, 122.09, 115.31, 115.05 (t, *J*<sub>C-D</sub> = 24.5 Hz), 52.09; **HRMS (ESI) *m/z* ([M+H]<sup>+</sup>)** Calcd. for C<sub>8</sub>H<sub>8</sub>DO<sub>3</sub> 154.0609, found: 154.0616.

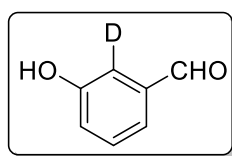

**3-Hydroxybenzaldehyde-2-*d* (49).** The representative procedure was followed using 2-bromo-3-hydroxybenzaldehyde (40.00 mg, 0.20 mmol) and D<sub>2</sub>O (36 μL, 2.0 mmol). Isolation by column chromatography (*n*-hexane : EtOAc = 20 : 1) yielded **49** (20.9 mg, 85 %) as a colorless oil. 99 % Deuterium incorporation was determined by <sup>1</sup>H NMR. **<sup>1</sup>H NMR (500 MHz, CDCl<sub>3</sub>)** δ 9.96 (s, 1H), 7.46 – 7.41 (m, 2H), 7.13 (m, 1H), 5.79 (s, 1H); **<sup>13</sup>C NMR (125 MHz, CDCl<sub>3</sub>)** δ 192.27, 156.38, 137.81, 130.35, 123.35,

122.01, 114.77; **HRMS** (ESI)  $m/z$  ( $[M+H]^+$ ) Calcd. for  $C_7H_6DO_2$  124.0503, found: 124.0500.

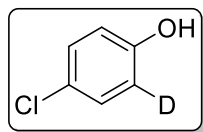

**4-Chlorophen-2-*d*-ol (50).** The representative procedure was followed using 4-chloro-2-iodophenol (50.69 mg, 0.20 mmol) and  $D_2O$  (36  $\mu L$ , 2.0 mmol). Isolation by column chromatography (*n*-hexane : EtOAc = 5 : 1) yielded **50** (23.3 mg, 90 %) as a yellow liquid. More than 99% Deuterium incorporation was determined by  $^1H$  NMR.  **$^1H$  NMR (500 MHz,  $CDCl_3$ )**  $\delta$  7.19 – 7.18 (m, 2H), 6.78 – 6.76 (m, 1H), 5.14 (br, 1H);  **$^{13}C$  NMR (125 MHz,  $CDCl_3$ )**  $\delta$  154.28, 129.48, 129.40, 125.48, 116.72, 116.45 (t,  $J_{C-D}$  = 24.5 Hz); **HRMS** (ESI)  $m/z$  ( $[M+H]^+$ ) Calcd. for  $C_6H_5DClO$  130.0164, found: 130.0170.

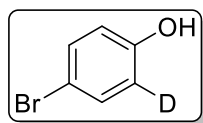

**4-Bromophen-2-*d*-ol (51).** The representative procedure was followed using 4-bromo-2-iodophenol (59.78 mg, 0.20 mmol) and  $D_2O$  (36  $\mu L$ , 2.0 mmol). Isolation by column chromatography (*n*-hexane : EtOAc = 5 : 1) yielded **51** (21.9 mg, 63 %) as a pink liquid. More than 99% Deuterium incorporation was determined by  $^1H$  NMR.  **$^1H$  NMR (500 MHz,  $CDCl_3$ )**  $\delta$  7.27 – 7.24 (m, 2H), 6.66 – 6.64 (m, 1H), 5.01 (br, 1H);  **$^{13}C$  NMR (125 MHz,  $CDCl_3$ )**  $\delta$  154.57, 132.44, 132.36, 117.19, 116.92 (t,  $J_{C-D}$  = 24.0 Hz), 112.84; **HRMS** (ESI)  $m/z$  ( $[M+H]^+$ ) Calcd. for  $C_6H_5DBrO$  173.9659, found: 173.9663.

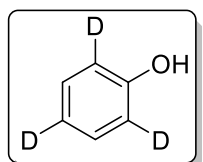

**Phen-2,4,6-*d*<sub>3</sub>-ol (52)**<sup>15</sup>. The representative procedure was followed using 2,4,6-triiodophenol (94.36 mg, 0.20 mmol) and  $D_2O$  (108  $\mu L$ , 6.0 mmol). Isolation by column chromatography (*n*-hexane : EtOAc = 5 : 1) yielded **52** (13.6 mg, 70 %) as yellow liquid.

Series of deuterium incorporation was determined by  $^1\text{H}$  NMR.  **$^1\text{H}$  NMR (500 MHz,  $\text{CDCl}_3$ )**  $\delta$  7.16 (s, 2H), 6.85 (t,  $J = 7.5$  Hz, 0.11H), 6.76 (d,  $J = 7.5$  Hz, 0.15H) 5.18 (br, 1H);  **$^{13}\text{C}$  NMR (125 MHz,  $\text{CDCl}_3$ )**  $\delta$  155.35, 129.42, 120.71, 120.45 (t,  $J_{\text{C-D}} = 25.0$  Hz), 115.28, 115.00 (t,  $J_{\text{C-D}} = 25.0$  Hz); **HRMS** (ESI)  $m/z$  ( $[\text{M}+\text{H}]^+$ ) Calcd. for  $\text{C}_6\text{H}_4\text{D}_3\text{O}$  98.0680, found: 98.0693.

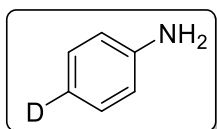

**Benzen-4-*d*-amine (53)**<sup>6</sup>. The representative procedure was followed using 4-chloroaniline (25.52 mg, 0.20 mmol) and  $\text{D}_2\text{O}$  (36  $\mu\text{L}$ , 2.0 mmol). Isolation by column chromatography (*n*-hexane : EtOAc = 5 : 1) yielded **53** (16.3 mg, 87 %) as a white solid. 80 % Deuterium incorporation was determined by  $^1\text{H}$  NMR.  **$^1\text{H}$  NMR (500 MHz,  $\text{CDCl}_3$ )**  $\delta$  7.17 – 7.14 (m, 2H), 6.76 (t,  $J = 7.0$  Hz, 0.2H), 6.70 – 6.68 (m, 2H), 3.61 (s, 2H);  **$^{13}\text{C}$  NMR (125 MHz,  $\text{CDCl}_3$ )**  $\delta$  146.27, 129.26, 129.14, 118.29 (t,  $J_{\text{C-D}} = 24.5$  Hz), 115.08; **HRMS** (ESI)  $m/z$  ( $[\text{M}+\text{H}]^+$ ) Calcd. for  $\text{C}_6\text{H}_7\text{DN}$  95.0714, found: 95.0711.

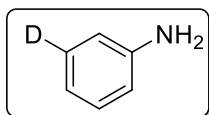

**Benzen-3-*d*-amine (54)**. The representative procedure was followed using 3-chloroaniline (25.52 mg, 0.20 mmol) and  $\text{D}_2\text{O}$  (36  $\mu\text{L}$ , 2.0 mmol). Isolation by column chromatography (*n*-hexane : EtOAc = 5 : 1) yielded **54** (15.4 mg, 82 %) as a white solid. 74 % Deuterium incorporation was determined by  $^1\text{H}$  NMR.  **$^1\text{H}$  NMR (500 MHz,  $\text{CDCl}_3$ )**  $\delta$  7.15 (t,  $J = 7.5$  Hz, 1.26H), 6.75 (d,  $J = 7.5$  Hz, 1H), 6.69 – 6.67 (m, 2H), 3.44 (s, 2H);  **$^{13}\text{C}$  NMR (125 MHz,  $\text{CDCl}_3$ )**  $\delta$  146.30, 129.23, 128.95 (t,  $J_{\text{C-D}} = 23.5$  Hz), 118.40, 115.07, 114.97; **HRMS** (ESI)  $m/z$  ( $[\text{M}+\text{H}]^+$ ) Calcd. for  $\text{C}_6\text{H}_7\text{DN}$  95.0714, found: 95.0720.

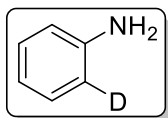

**Benzen-2-*d*-amine (55)**<sup>6</sup>. The representative procedure was followed using 2-chloroaniline (25.52 mg, 0.20 mmol) and D<sub>2</sub>O (36  $\mu$ L, 2.0 mmol). Isolation by column chromatography (*n*-hexane : EtOAc = 5 : 1) yielded **55** (16.5 mg, 88 %) as a white solid. More than 99 % Deuterium incorporation was determined by <sup>1</sup>H NMR. **<sup>1</sup>H NMR (500 MHz, CDCl<sub>3</sub>)**  $\delta$  7.10 – 7.06 (m, 2H), 6.68 (t, *J* = 7.0 Hz, 1H), 6.66 – 6.60 (m, 1H), 3.37 (s, 2H); **<sup>13</sup>C NMR (125 MHz, CDCl<sub>3</sub>)**  $\delta$  146.26, 129.24, 129.14, 118.53, 115.09, 114.80 (t, *J*<sub>C-D</sub> = 24.0 Hz); **HRMS (ESI)** *m/z* ([*M*+*H*]<sup>+</sup>) Calcd. for C<sub>6</sub>H<sub>7</sub>DN 95.0714, found: 95.0715.

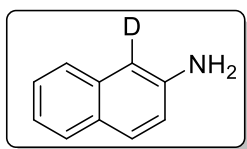

**Naphthalen-1-*d*-2-amine (56)**. The representative procedure was followed using 1-chloronaphthalen-2-amine (35.41 mg, 0.20 mmol) and D<sub>2</sub>O (36  $\mu$ L, 2.0 mmol). Isolation by column chromatography (*n*-hexane : EtOAc = 5 : 1) yielded **56** (20.4 mg, 71 %) as a white solid. 75 % Deuterium incorporation was determined by <sup>1</sup>H NMR. **<sup>1</sup>H NMR (500 MHz, CDCl<sub>3</sub>)**  $\delta$  7.67 (d, *J* = 8.0 Hz, 1H), 7.64 (d, *J* = 8.0 Hz, 1H), 7.58 (d, *J* = 8.0 Hz, 1H), 7.37 – 7.33 (m, 1H), 7.23 – 7.19 (m, 1H), 6.96 – 6.95 (m, 0.25H), 6.91 (d, *J* = 8.0 Hz, 1H), 3.76 (br, 2H); **<sup>13</sup>C NMR (125 MHz, CDCl<sub>3</sub>)**  $\delta$  144.05, 134.89, 129.14, 127.95, 127.67, 126.29, 125.76, 122.42, 118.19, 108.56, 108.25 (t, *J*<sub>C-D</sub> = 24.0 Hz); **HRMS (ESI)** *m/z* ([*M*+*H*]<sup>+</sup>) Calcd. for C<sub>10</sub>H<sub>9</sub>DN 145.0871, found: 145.0879.

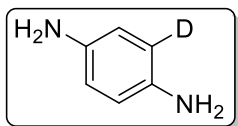

**Benzene-2-*d*-1,4-diamine (57)**. The representative procedure was followed using 2-chlorobenzene-1,4-diamine (28.41 mg, 0.20 mmol) and D<sub>2</sub>O (36  $\mu$ L, 2.0 mmol). Isolation by column chromatography (*n*-hexane : EtOAc = 1 : 1) yielded **57** (19.4 mg,

89 %) as a white solid. 54 % Deuterium incorporation was determined by  $^1\text{H}$  NMR.  **$^1\text{H}$  NMR (500 MHz,  $\text{CDCl}_3$ )**  $\delta$  6.92 (t,  $J$  = 8.0 Hz, 1H), 6.12 – 6.10 (m, 2H), 6.01 (t,  $J$  = 8.0 Hz, 0.46H), 3.45 (br, 4H);  **$^{13}\text{C}$  NMR (125 MHz,  $\text{CDCl}_3$ )**  $\delta$  147.45, 130.11, 105.92, 101.90; **HRMS** (ESI)  $m/z$  ( $[\text{M}+\text{H}]^+$ ) Calcd. for  $\text{C}_6\text{H}_8\text{DN}_2$  110.0823, found: 110.0830.

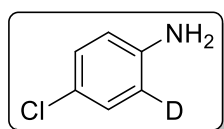

**4-Chlorobenzen-2-*d*-amine (58).** The representative procedure was followed using 4-chloro-2-iodoaniline (50.69 mg, 0.20 mmol) and  $\text{D}_2\text{O}$  (36  $\mu\text{L}$ , 2.0 mmol). Isolation by column chromatography (*n*-hexane : EtOAc = 5 : 1) yielded **58** (18.2 mg, 71 %) as a yellow liquid. More than 99% Deuterium incorporation was determined by  $^1\text{H}$  NMR.  **$^1\text{H}$  NMR (500 MHz,  $\text{CDCl}_3$ )**  $\delta$  7.03 – 7.00 (m, 2H), 6.53 – 6.51 (m, 1H), 3.48 (br, 2H);  **$^{13}\text{C}$  NMR (125 MHz,  $\text{CDCl}_3$ )**  $\delta$  144.85, 129.06, 128.97, 123.11, 116.20, 115.91 (t,  $J_{\text{C-D}}$  = 24.0 Hz); **HRMS** (ESI)  $m/z$  ( $[\text{M}+\text{H}]^+$ ) Calcd. for  $\text{C}_6\text{H}_6\text{DCIN}$  129.0324, found: 129.0321.

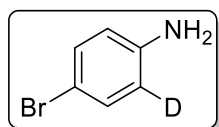

**4-Bromobenzen-2-*d*-amine (59).** The representative procedure was followed using 4-bromo-2-iodoaniline (59.58 mg, 0.20 mmol) and  $\text{D}_2\text{O}$  (36  $\mu\text{L}$ , 2.0 mmol). Isolation by column chromatography (*n*-hexane : EtOAc = 5 : 1) yielded **59** (25.6 mg, 74 %) as a colorless liquid. More than 99% Deuterium incorporation was determined by  $^1\text{H}$  NMR.  **$^1\text{H}$  NMR (500 MHz,  $\text{CDCl}_3$ )**  $\delta$  7.16 – 7.14 (m, 2H), 6.48 – 6.46 (m, 1H), 3.48 (br, 2H);  **$^{13}\text{C}$  NMR (125 MHz,  $\text{CDCl}_3$ )**  $\delta$  145.31, 131.94, 131.85, 116.66, 116.38 (t,  $J_{\text{C-D}}$  = 24.0 Hz), 110.12; **HRMS** (ESI)  $m/z$  ( $[\text{M}+\text{H}]^+$ ) Calcd. for  $\text{C}_6\text{H}_6\text{DBrN}$  172.9819, found: 172.9826.

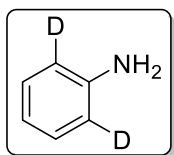

**Benzen-2,6-*d*<sub>2</sub>-amine (60)**<sup>16</sup>. The representative procedure was followed using 2,6-dichloroaniline (32.41 mg, 0.20 mmol) and D<sub>2</sub>O (72 μL, 4.0 mmol). Isolation by column chromatography (*n*-hexane : EtOAc = 5 : 1) yielded **60** (13.9 mg, 73 %) as an orange liquid. 93% Deuterium incorporation was determined by <sup>1</sup>H NMR. **<sup>1</sup>H NMR (500 MHz, CDCl<sub>3</sub>)** δ 7.08 (d, *J* = 7.5 Hz, 2H), 6.68 (t, *J* = 7.5 Hz, 1H), 6.61 (d, *J* = 7.5 Hz, 0.15H), 3.54 (br, 2H); **<sup>13</sup>C NMR (125 MHz, CDCl<sub>3</sub>)** δ 146.19, 129.13, 118.51, 115.07, 114.79 (t, *J*<sub>C-D</sub> = 24.0 Hz); **HRMS (ESI)** *m/z* ([*M*+*H*]<sup>+</sup>) Calcd. for C<sub>6</sub>H<sub>6</sub>D<sub>2</sub>N 96.0777, found: 96.0785.

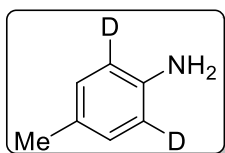

**2,6-*d*<sub>2</sub>-4-Methylaniline (61)**<sup>17</sup>. The representative procedure was followed using 2,6-dichloro-4-methylaniline (35.21 mg, 0.20 mmol) and D<sub>2</sub>O (72 μL, 4.0 mmol). Isolation by column chromatography (*n*-hexane : EtOAc = 5 : 1) yielded **61** (16.4 mg, 75 %) as an orange liquid. 96% Deuterium incorporation was determined by <sup>1</sup>H NMR. **<sup>1</sup>H NMR (500 MHz, CDCl<sub>3</sub>)** δ 6.88 (s, 2H), 6.52 (d, *J* = 8.5 Hz, 0.08H), 3.36 (br, 2H), 2.16 (s, 3H); **<sup>13</sup>C NMR (125 MHz, CDCl<sub>3</sub>)** δ 143.63, 129.58, 127.71, 115.21, 114.93 (t, *J*<sub>C-D</sub> = 23.5 Hz), 20.41; **HRMS (ESI)** *m/z* ([*M*+*H*]<sup>+</sup>) Calcd. for C<sub>7</sub>H<sub>8</sub>D<sub>2</sub>N 110.0933, found: 110.0932.

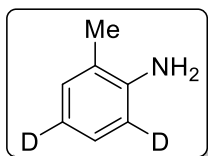

**4,6-*d*<sub>2</sub>-2-Methylaniline (62)**. The representative procedure was followed using 2,4-dichloro-6-methylaniline (35.21 mg, 0.20 mmol) and D<sub>2</sub>O (72 μL, 4.0 mmol). Isolation by column chromatography (*n*-hexane : EtOAc = 5 : 1) yielded **62** (14.8 mg, 68 %) as an orange liquid. 92% Deuterium incorporation was determined by <sup>1</sup>H NMR. **<sup>1</sup>H NMR**

(**500 MHz, CDCl<sub>3</sub>**)  $\delta$  6.97 – 6.98 (m, 2H), 6.65 – 6.59 (m, 0.13H), 3.50 (br, 2H), 2.09 (s, 3H); **<sup>13</sup>C NMR (125 MHz, CDCl<sub>3</sub>)**  $\delta$  144.43, 130.27, 126.68, 122.26, 118.56, 118.30 (t,  $J = 24.5$  Hz), 114.86, 114.58 (t,  $J_{C-D} = 24.5$  Hz), 17.29; **HRMS (ESI)**  $m/z$  ( $[M+H]^+$ ) Calcd. for C<sub>7</sub>H<sub>8</sub>D<sub>2</sub>N 110.0933, found: 110.0943.

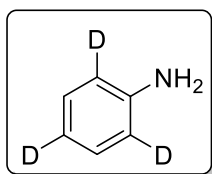

**Benzen-2,4,6-*d*<sub>3</sub>-amine (63)**<sup>15</sup>. The representative procedure was followed using 2,4,6-trichloroaniline (39.29 mg, 0.20 mmol) and D<sub>2</sub>O (108  $\mu$ L, 6.0 mmol). Isolation by column chromatography (*n*-hexane : EtOAc = 5 : 1) yielded **63** (15.5 mg, 87 %) as yellow liquid. Series of deuterium incorporation was determined by <sup>1</sup>H NMR. **<sup>1</sup>H NMR (500 MHz, CDCl<sub>3</sub>)**  $\delta$  7.14 (s, 2H), 6.75 (t,  $J = 7.5$  Hz, 0.13H), 6.67 (d,  $J = 7.5$  Hz, 0.21H) 3.62 (br, 2H); **<sup>13</sup>C NMR (125 MHz, CDCl<sub>3</sub>)**  $\delta$  146.20, 129.00, 118.47, 118.20 (t,  $J_{C-D} = 25.0$  Hz), 115.04, 114.76 (t,  $J_{C-D} = 24.0$  Hz); **HRMS (ESI)**  $m/z$  ( $[M+H]^+$ ) Calcd. for C<sub>6</sub>H<sub>5</sub>D<sub>3</sub>N 97.0840, found: 97.0847.

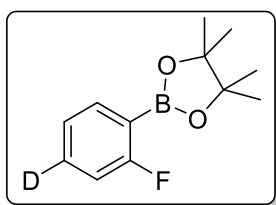

**2-(2-Fluorophenyl-4-*d*)-4,4,5,5-tetramethyl-1,3,2-dioxaborolane (64)**. The representative procedure was followed using 2-(4-chloro-2-fluorophenyl)-4,4,5,5-tetramethyl-1,3,2-dioxaborolane (51.32 mg, 0.20 mmol) and D<sub>2</sub>O (36  $\mu$ L, 2.0 mmol). Isolation by column chromatography (*n*-hexane : EtOAc = 50 : 1) yielded **64** (37.0 mg, 83 %) as colorless liquid. 99% Deuterium incorporation was determined by <sup>1</sup>H NMR. **<sup>1</sup>H NMR (400 MHz, CDCl<sub>3</sub>)**  $\delta$  7.65 (t,  $J = 7.0$  Hz, 1H), 7.06 (d,  $J = 7.0$  Hz, 1H), 6.95 (d,  $J = 7.0$  Hz, 1H), 1.29 (s, 12H); **<sup>13</sup>C NMR (100 MHz, CDCl<sub>3</sub>)**  $\delta$  167.17 (d,  $J = 249.0$  Hz), 136.80 (d,  $J = 8.0$  Hz), 132.91 (t,  $J_{C-D} = 28.0$  Hz), 123.44 (d,  $J = 3.0$  Hz), 115.12

(d,  $J = 24.0$  Hz), 83.86, 24.79;  **$^{19}\text{F}$  NMR (301 MHz,  $\text{CDCl}_3$ )  $\delta$  -102.626; HRMS (ESI)  $m/z$  ( $[\text{M}+\text{H}]^+$ )** Calcd. for  $\text{C}_{12}\text{H}_{16}\text{DBFO}_2$  224.1363, found: 224.1359.

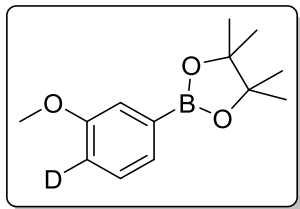

**2-(3-Methoxyphenyl-4-d)-4,4,5,5-tetramethyl-1,3,2-dioxaborolane (65).** The representative procedure was followed using 2-(4-chloro-3-methoxyphenyl)-4,4,5,5-tetramethyl-1,3,2-dioxaborolane (53.71 mg, 0.20 mmol) and  $\text{D}_2\text{O}$  (36  $\mu\text{L}$ , 2.0 mmol). Isolation by column chromatography ( $n$ -hexane : EtOAc = 20 : 1) yielded **65** (41.8 mg, 89 %) as orange liquid. 87% Deuterium incorporation was determined by  $^1\text{H}$  NMR.  **$^1\text{H}$  NMR (400 MHz,  $\text{CDCl}_3$ )  $\delta$  7.34 – 7.32 (m, 1H), 7.25 – 7.20 (m, 2H), 6.94 – 6.91 (m, 0.13H), 3.75 (s, 3H), 1.29 (s, 12H);  $^{13}\text{C}$  NMR (125 MHz,  $\text{CDCl}_3$ )  $\delta$  158.96, 128.78, 127.12, 118.72, 117.51 (t,  $J_{\text{C-D}} = 23.0$  Hz), 83.76, 55.16, 24.81; HRMS (ESI)  $m/z$  ( $[\text{M}+\text{H}]^+$ )** Calcd. for  $\text{C}_{13}\text{H}_{19}\text{DBO}_3$  236.1563, found: 236.1561.

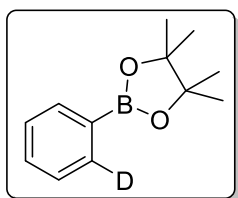

**4,4,5,5-Tetramethyl-2-(phenyl-2-d)-1,3,2-dioxaborolane (66)**<sup>18</sup>. The representative procedure was followed using 2-(2-chlorophenyl)-4,4,5,5-tetramethyl-1,3,2-dioxaborolane (47.70 mg, 0.20 mmol) and  $\text{D}_2\text{O}$  (36  $\mu\text{L}$ , 2.0 mmol). Isolation by column chromatography ( $n$ -hexane : EtOAc = 50 : 1) yielded **66** (36.9 mg, 90 %) as yellow liquid. More than 99% Deuterium incorporation was determined by  $^1\text{H}$  NMR.  **$^1\text{H}$  NMR (400 MHz,  $\text{CDCl}_3$ )  $\delta$  7.73 (d,  $J = 7.5$  Hz, 1H), 7.37 (t,  $J = 7.5$  Hz, 1H), 7.30 – 7.27 (m, 2H), 1.27 (s, 12H);  $^{13}\text{C}$  NMR (100 MHz,  $\text{CDCl}_3$ )  $\delta$  134.70, 134.41 (t,  $J_{\text{C-D}} = 24.0$  Hz), 131.22, 127.68, 127.56, 83.73, 24.84; HRMS (ESI)  $m/z$  ( $[\text{M}+\text{H}]^+$ )** Calcd. for  $\text{C}_{12}\text{H}_{17}\text{DBO}_2$  206.1457, found: 206.1451.

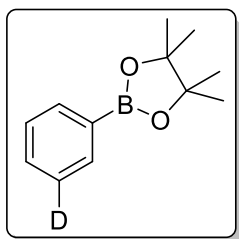

**4,4,5,5-Tetramethyl-2-(phenyl-3-*d*)-1,3,2-dioxaborolane (67)**<sup>18</sup>. The representative procedure was followed using 2-(3-chlorophenyl)-4,4,5,5-tetramethyl-1,3,2-dioxaborolane (47.70 mg, 0.20 mmol) and D<sub>2</sub>O (36 μL, 2.0 mmol). Isolation by column chromatography (*n*-hexane : EtOAc = 50 : 1) yielded **67** (35.7 mg, 87 %) as yellow liquid. 89% Deuterium incorporation was determined by <sup>1</sup>H NMR. **<sup>1</sup>H NMR (400 MHz, CDCl<sub>3</sub>)** δ 7.75 – 7.73 (m, 2H), 7.39 – 7.37 (m, 1H), 7.29 (t, *J* = 7.5 Hz, 1.11H), 1.27 (s, 12H); **<sup>13</sup>C NMR (100 MHz, CDCl<sub>3</sub>)** δ 134.72, 134.60, 131.22, 131.12, 127.68, 127.38 (t, *J*<sub>C-D</sub> = 24.0 Hz), 83.73, 24.85; **HRMS (ESI)** *m/z* ([*M*+*H*]<sup>+</sup>) Calcd. for C<sub>12</sub>H<sub>17</sub>DBO<sub>2</sub> 206.1457, found: 206.1462.

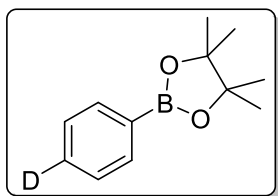

**4,4,5,5-Tetramethyl-2-(phenyl-4-*d*)-1,3,2-dioxaborolane (68)**<sup>18</sup>. The representative procedure was followed using 2-(4-chlorophenyl)-4,4,5,5-tetramethyl-1,3,2-dioxaborolane (47.70 mg, 0.20 mmol) and D<sub>2</sub>O (36 μL, 2.0 mmol). Isolation by column chromatography (*n*-hexane : EtOAc = 20 : 1) yielded **68** (37.7 mg, 92 %) as a colorless liquid. More than 99 % Deuterium incorporation was determined by <sup>1</sup>H NMR. **<sup>1</sup>H NMR (500 MHz, CDCl<sub>3</sub>)** δ 7.74 (d, *J* = 8.0 Hz, 2H), 7.30 (d, *J* = 8.0 Hz, 2H), 1.27 (s, 12H); **<sup>13</sup>C NMR (125 MHz, CDCl<sub>3</sub>)** δ 134.69, 130.94 (t, *J*<sub>C-D</sub> = 30.0 Hz), 127.57, 83.73, 24.84; **HRMS (ESI)** *m/z* ([*M*+*H*]<sup>+</sup>) Calcd. for C<sub>12</sub>H<sub>17</sub>DBO<sub>2</sub> 206.1457, found: 206.1454.

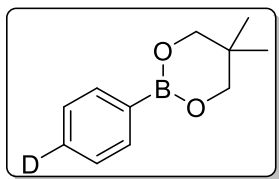

**5,5-Dimethyl-2-(phenyl-4-*d*)-1,3,2-dioxaborinane (69).** The representative procedure was followed using 2-(4-chlorophenyl)-5,5-dimethyl-1,3,2-dioxaborinane (44.90 mg, 0.20 mmol) and D<sub>2</sub>O (36  $\mu$ L, 2.0 mmol). Isolation by column chromatography (*n*-hexane : EtOAc = 50 : 1) yielded **69** (31.0 mg, 81 %) as yellow liquid. More than 99% Deuterium incorporation was determined by <sup>1</sup>H NMR. **<sup>1</sup>H NMR (400 MHz, CDCl<sub>3</sub>)  $\delta$**  7.72 (d, *J* = 8.0 Hz, 2H), 7.27 (d, *J* = 8.0 Hz, 1H), 3.69 (s, 4H), 0.95 (s, 6H); **<sup>13</sup>C NMR (100 MHz, CDCl<sub>3</sub>)  $\delta$**  133.79, 130.34 (t, *J*<sub>C-D</sub> = 24.0 Hz), 127.55, 127.44, 72.28, 31.86, 21.88; **HRMS (ESI) *m/z* ([M+H]<sup>+</sup>)** Calcd. for C<sub>11</sub>H<sub>15</sub>DBO<sub>2</sub> 192.1301, found: 192.1307.

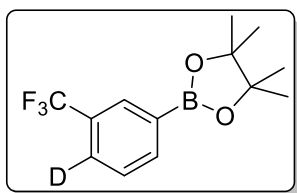

**4,4,5,5-Tetramethyl-2-(3-(trifluoromethyl)phenyl-4-*d*)-1,3,2-dioxaborolane (70).** The representative procedure was followed using 2-(4-chloro-3-(trifluoromethyl)phenyl)-4,4,5,5-tetramethyl-1,3,2-dioxaborolane (61.30 mg, 0.20 mmol) and D<sub>2</sub>O (36  $\mu$ L, 2.0 mmol). Isolation by column chromatography (*n*-hexane : EtOAc = 50 : 1) yielded **70** (33.3 mg, 61 %) as colorless liquid. More than 99% Deuterium incorporation was determined by <sup>1</sup>H NMR. **<sup>1</sup>H NMR (400 MHz, CDCl<sub>3</sub>)  $\delta$**  7.99 (s, 1H), 7.90 (d, *J* = 7.5 Hz, 1H), 7.41 (d, *J* = 7.5 Hz, 1H), 1.29 (s, 12H); **<sup>13</sup>C NMR (100 MHz, CDCl<sub>3</sub>)  $\delta$**  137.97, 131.33 (q, *J* = 3.5 Hz), 129.90 (q, *J* = 40.0 Hz), 127.89, 124.27 (q, *J* = 240.0 Hz), 84.26, 24.85; **<sup>19</sup>F NMR (301 MHz, CDCl<sub>3</sub>)  $\delta$**  -62.607; **HRMS (ESI) *m/z* ([M+H]<sup>+</sup>)** Calcd. for C<sub>13</sub>H<sub>16</sub>DBF<sub>3</sub>O<sub>2</sub> 274.1331, found: 274.1340.

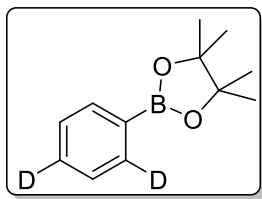

**4,4,5,5-Tetramethyl-2-(phenyl-2,4-*d*<sub>2</sub>)-1,3,2-dioxaborolane (71).** The representative procedure was followed using 2-(2,4-dichlorophenyl)-4,4,5,5-tetramethyl-1,3,2-dioxaborolane (54.59 mg, 0.20 mmol) and D<sub>2</sub>O (72 μL, 4.0 mmol). Isolation by column chromatography (*n*-hexane : EtOAc = 50 : 1) yielded **71** (35.9 mg, 87 %) as colorless liquid. More than 99% Deuterium incorporation was determined by <sup>1</sup>H NMR. **<sup>1</sup>H NMR (400 MHz, CDCl<sub>3</sub>)** δ 7.73 (t, *J* = 7.5 Hz, 1H), 7.30 – 7.28 (m, 2H), 1.27 (s, 12H); **<sup>13</sup>C NMR (100 MHz, CDCl<sub>3</sub>)** δ 134.70, 134.41 (t, *J*<sub>C-D</sub> = 24.0 Hz), 130.90 (t, *J*<sub>C-D</sub> = 24.0 Hz), 127.57, 127.45, 83.74, 24.85; **HRMS** (ESI) *m/z* ([*M*+*H*]<sup>+</sup>) Calcd. for C<sub>12</sub>H<sub>16</sub>D<sub>2</sub>BO<sub>2</sub> 207.1520, found: 207.1521.

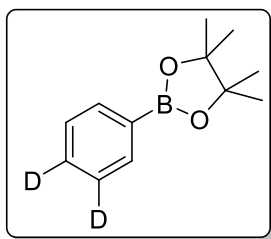

**4,4,5,5-Tetramethyl-2-(phenyl-3,4-*d*<sub>2</sub>)-1,3,2-dioxaborolane (72).** The representative procedure was followed using 2-(3,4-dichlorophenyl)-4,4,5,5-tetramethyl-1,3,2-dioxaborolane (54.59 mg, 0.20 mmol) and D<sub>2</sub>O (72 μL, 4.0 mmol). Isolation by column chromatography (*n*-hexane : EtOAc = 50 : 1) yielded **72** (31.7 mg, 77 %) as colorless liquid. 98% Deuterium incorporation was determined by <sup>1</sup>H NMR. **<sup>1</sup>H NMR (400 MHz, CDCl<sub>3</sub>)** δ 7.75 – 7.73 (m, 2H), 7.28 (d, *J* = 7.5 Hz, 1.06H), 1.27 (s, 12H); **<sup>13</sup>C NMR (100 MHz, CDCl<sub>3</sub>)** δ 134.72, 134.60, 130.81 (t, *J*<sub>C-D</sub> = 24.0 Hz), 127.56, 127.28 (t, *J*<sub>C-D</sub> = 24.0 Hz), 83.73, 24.85; **HRMS** (ESI) *m/z* ([*M*+*H*]<sup>+</sup>) Calcd. for C<sub>12</sub>H<sub>16</sub>D<sub>2</sub>BO<sub>2</sub> 207.1520, found: 207.1525.

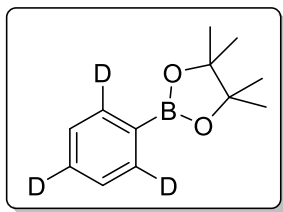

**4,4,5,5-Tetramethyl-2-(phenyl-2,4,6-*d*<sub>3</sub>)-1,3,2-dioxaborolane (73).** The representative procedure was followed using 4,4,5,5-tetramethyl-2-(2,4,6-trichlorophenyl)-1,3,2-dioxaborolane (61.48 mg, 0.20 mmol) and D<sub>2</sub>O (108 μL, 6.0 mmol). Isolation by column chromatography (*n*-hexane : EtOAc = 50 : 1) yielded **73** (29.4 mg, 71 %) as colorless liquid. Series of deuterium incorporation was determined by <sup>1</sup>H NMR. **<sup>1</sup>H NMR (400 MHz, CDCl<sub>3</sub>)** δ 7.29 (s, 2H), 1.27 (s, 12H); **<sup>13</sup>C NMR (100 MHz, CDCl<sub>3</sub>)** δ 127.46, 121.22, 83.74, 24.85; **HRMS** (ESI) *m/z* ([M+H]<sup>+</sup>) Calcd. for C<sub>12</sub>H<sub>15</sub>D<sub>3</sub>BO<sub>2</sub> 208.1583, found: 208.1580.

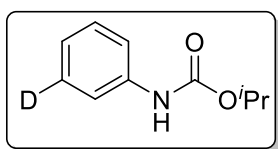

**Isopropyl (phenyl-3-*d*)carbamate (74).** The representative procedure was followed using isopropyl (3-chlorophenyl)carbamate (42.73 mg, 0.20 mmol) and D<sub>2</sub>O (36 μL, 2.0 mmol). Isolation by column chromatography (*n*-hexane : EtOAc = 20 : 1) yielded **74** (30.6 mg, 85 %) as a white solid. 80 % Deuterium incorporation was determined by <sup>1</sup>H NMR. **<sup>1</sup>H NMR (500 MHz, CDCl<sub>3</sub>)** δ 7.39 – 7.38 (m, 2H), 7.30 – 7.27 (m, 1.20H), 7.05 – 7.03 (m, 1H), 6.68 (s, 1H), 1.29 (s, 6H); **<sup>13</sup>C NMR (125 MHz, CDCl<sub>3</sub>)** δ 153.21, 138.06, 128.94, 128.66 (t, *J*<sub>C-D</sub> = 24.5 Hz), 123.14, 123.03, 118.51, 68.63, 22.04; **HRMS** (ESI) *m/z* ([M+H]<sup>+</sup>) Calcd. for C<sub>10</sub>H<sub>13</sub>DNO<sub>2</sub> 181.1082, found: 181.1089.

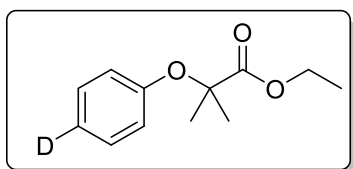

**Ethyl 2-methyl-2-(phenoxy-4-*d*)propanoate (75)**<sup>19</sup>. The representative procedure was followed using ethyl 2-(4-chlorophenoxy)-2-methylpropanoate (48.54 mg, 0.20 mmol)

and D<sub>2</sub>O (36  $\mu$ L, 2.0 mmol). Isolation by column chromatography (*n*-hexane : EtOAc = 50 : 1) yielded **75** (31.4 mg, 75 %) as a colorless oil. 99 % Deuterium incorporation was determined by <sup>1</sup>H NMR. **<sup>1</sup>H NMR (500 MHz, CDCl<sub>3</sub>)**  $\delta$  7.24 (d, *J* = 8.5 Hz, 2H), 6.85 (d, *J* = 8.5 Hz, 2H), 4.24 (q, *J* = 7.5 Hz, 2H), 1.60 (s, 6H), 1.24 (t, *J* = 7.5 Hz, 3H); **<sup>13</sup>C NMR (125 MHz, CDCl<sub>3</sub>)**  $\delta$  174.32, 155.38, 128.99, 121.77 (t, *J*<sub>C-D</sub> = 24.5 Hz), 119.05, 78.99, 61.37, 25.35, 14.04; **HRMS (ESI)** *m/z* ([*M*+*H*]<sup>+</sup>) Calcd. for C<sub>12</sub>H<sub>16</sub>DO<sub>3</sub> 210.1235, found: 210.1234.

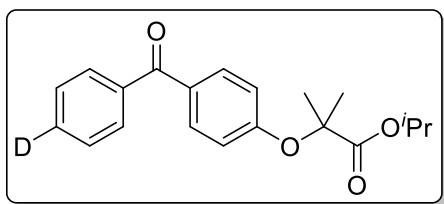

**Isopropyl 2-(4-(benzoyl-4-*d*)phenoxy)-2-methylpropanoate (76)**<sup>1</sup>. The representative procedure was followed using isopropyl 2-(4-(4-chlorobenzoyl)phenoxy)-2-methylpropanoate (72.17 mg, 0.20 mmol) and D<sub>2</sub>O (36  $\mu$ L, 2.0 mmol). Isolation by column chromatography (*n*-hexane : EtOAc = 20 : 1) yielded **76** (45.2 mg, 69 %) as a white solid. More than 99 % Deuterium incorporation was determined by <sup>1</sup>H NMR. **<sup>1</sup>H NMR (500 MHz, CDCl<sub>3</sub>)**  $\delta$  7.76 (t, *J* = 9.0 Hz, 4H), 7.47 (d, *J* = 9.0 Hz, 2H), 6.87 (d, *J* = 9.0 Hz, 2H), 5.09 (sept, *J* = 8.0 Hz, 1H), 1.66 (s, 6H), 1.21 (d, *J* = 8.0 Hz, 6H); **<sup>13</sup>C NMR (125 MHz, CDCl<sub>3</sub>)**  $\delta$  195.48, 173.11, 159.49, 138.10, 132.00, 131.60 (t, *J*<sub>C-D</sub> = 24.0 Hz), 130.55, 129.68, 128.03, 117.11, 79.32, 69.26, 25.33, 21.48; **HRMS (ESI)** *m/z* ([*M*+*H*]<sup>+</sup>) Calcd. for C<sub>20</sub>H<sub>22</sub>DO<sub>4</sub> 328.1654, found: 328.1659.

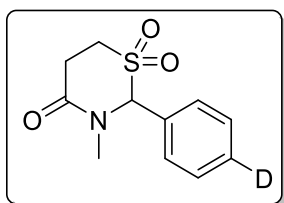

**3-Methyl-2-(phenyl-4-*d*)-1,3-thiazinan-4-one 1,1-dioxide (77)**. The representative procedure was followed using 2-(4-chlorophenyl)-3-methyl-1,3-thiazinan-4-one 1,1-

dioxide (54.75 mg, 0.20 mmol) and D<sub>2</sub>O (36  $\mu$ L, 2.0 mmol). Isolation by column chromatography (*n*-hexane : EtOAc = 1 : 1) yielded **77** (37.5 mg, 78 %) as a white solid. 99 % Deuterium incorporation was determined by <sup>1</sup>H NMR. **<sup>1</sup>H NMR (500 MHz, CDCl<sub>3</sub>)**  $\delta$  7.42 (d, *J* = 8.0 Hz, 2H), 7.32 (d, *J* = 8.0 Hz, 2H), 5.22 (s, 1H), 3.29 – 3.25 (m, 1H), 3.12 – 3.04 (m, 3H), 2.90 (s, 3H); **<sup>13</sup>C NMR (125 MHz, CDCl<sub>3</sub>)**  $\delta$  166.11, 130.12 (t, *J*<sub>C-D</sub> = 24.5 Hz), 130.08, 129.15, 128.04, 80.57, 43.24, 36.20, 30.52; **HRMS** (ESI) *m/z* ([M+H]<sup>+</sup>) Calcd. for C<sub>11</sub>H<sub>13</sub>DNO<sub>3</sub>S 241.0752, found: 241.0757.

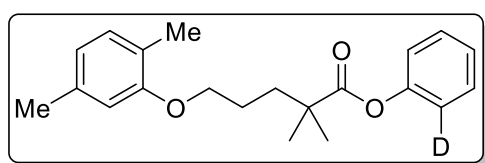

**Phenyl-2-*d* 5-(2,5-dimethylphenoxy)-2,2-dimethylpentanoate (78).** The representative procedure was followed using 2-chlorophenyl 5-(2,5-dimethylphenoxy)-2,2-dimethylpentanoate (72.18 mg, 0.20 mmol) and D<sub>2</sub>O (36  $\mu$ L, 2.0 mmol). Isolation by column chromatography (*n*-hexane : EtOAc = 5 : 1) yielded **78** (40.6 mg, 62 %) as a white solid. 99% Deuterium incorporation was determined by <sup>1</sup>H NMR. **<sup>1</sup>H NMR (500 MHz, CDCl<sub>3</sub>)**  $\delta$  7.25 – 7.22 (m, 2H), 7.10 – 7.07 (m, 1H), 6.93 – 6.88 (m, 2H), 6.56 – 6.52 (m, 2H), 3.87 – 3.85 (m, 2H), 2.20 (s, 3H), 2.08 (s, 3H), 1.78 – 1.77 (m, 4H), 1.26 (s, 6H); **<sup>13</sup>C NMR (125 MHz, CDCl<sub>3</sub>)**  $\delta$  176.16, 156.80, 150.91, 136.33, 130.27, 129.24, 129.14, 125.52, 123.51, 121.42, 121.16 (t, *J*<sub>C-D</sub> = 25.0 Hz), 120.69, 111.88, 67.69, 42.31, 37.08, 25.20, 25.06, 21.31, 15.71; **HRMS** (ESI) *m/z* ([M+H]<sup>+</sup>) Calcd. for C<sub>21</sub>H<sub>26</sub>DO<sub>3</sub> 328.2017, found: 328.2020.

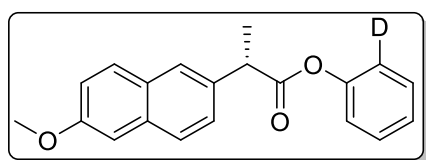

**Phenyl-2-*d* (S)-2-(6-methoxynaphthalen-2-yl)propanoate (79).** The representative procedure was followed using 2-chlorophenyl (S)-2-(6-methoxynaphthalen-2-yl)propanoate (68.16 mg, 0.20 mmol) and D<sub>2</sub>O (36  $\mu$ L, 2.0 mmol). Isolation by column chromatography (*n*-hexane : EtOAc = 5 : 1) yielded **79** (43.0 mg, 70 %) as a white solid.

99% Deuterium incorporation was determined by  $^1\text{H}$  NMR.  $^1\text{H}$  NMR (500 MHz,  $\text{CDCl}_3$ )  $\delta$  7.89 – 7.82 (m, 3H), 7.63 – 7.61 (m, 1H), 7.42 – 7.39 (m, 2H), 7.29 – 7.23 (m, 3H), 7.12 – 7.10 (m, 1H), 4.20 (q,  $J$  = 7.0 Hz, 1H), 3.97 (s, 3H), 1.81 (d,  $J$  = 7.0 Hz, 3H);  $^{13}\text{C}$  NMR (125 MHz,  $\text{CDCl}_3$ )  $\delta$  173.01, 157.66, 150.72, 135.06, 133.74, 129.21, 129.18, 129.08, 128.90, 127.27, 126.03, 126.00, 125.60, 121.28, 121.00 (t,  $J_{\text{C-D}}$  = 25.0 Hz), 118.99, 105.55, 55.12, 45.46, 18.41; HRMS (ESI)  $m/z$  ( $[\text{M}+\text{H}]^+$ ) Calcd. for  $\text{C}_{20}\text{H}_{18}\text{DO}_3$  308.1391, found: 308.1400.

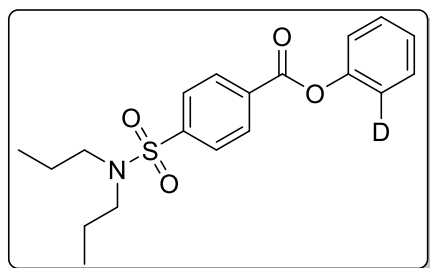

**Phenyl-2-*d* 4-(*N,N*-dipropylsulfamoyl)benzoate (80).** The representative procedure was followed using 2-chlorophenyl 4-(*N,N*-dipropylsulfamoyl)benzoate (79.18 mg, 0.20 mmol) and  $\text{D}_2\text{O}$  (36  $\mu\text{L}$ , 2.0 mmol). Isolation by column chromatography (*n*-hexane : EtOAc = 5 : 1) yielded **80** (47.8 mg, 66 %) as a white solid. 99% Deuterium incorporation was determined by  $^1\text{H}$  NMR.  $^1\text{H}$  NMR (500 MHz,  $\text{CDCl}_3$ )  $\delta$  8.22 – 8.20 (m, 2H), 7.85 – 7.84 (m, 2H), 7.35 – 7.32 (m, 2H), 7.20 – 7.17 (m, 1H), 7.13 – 7.11 (m, 1H), 3.05 – 3.02 (m, 4H), 1.49 – 1.44 (m, 4H), 0.80 – 0.77 (m, 6H);  $^{13}\text{C}$  NMR (125 MHz,  $\text{CDCl}_3$ )  $\delta$  163.64, 150.45, 144.74, 132.70, 130.60, 129.41, 129.31, 126.99, 126.03, 121.31, 121.05 (t,  $J_{\text{C-D}}$  = 25.0 Hz), 49.80, 21.78, 11.00; HRMS (ESI)  $m/z$  ( $[\text{M}+\text{H}]^+$ ) Calcd. for  $\text{C}_{19}\text{H}_{23}\text{DNO}_4\text{S}$  363.1483, found: 363.1488.

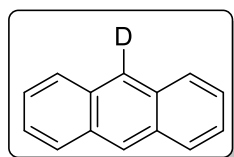

**Anthracene-9-*d* (81)**<sup>2</sup>. The representative procedure was followed using 9-chloroanthracene (42.54 mg, 0.20 mmol) and  $\text{D}_2\text{O}$  (18  $\mu\text{L}$ , 1.0 mmol). Isolation by column chromatography (*n*-hexane) yielded **81** (30.8 mg, 86 %) as a colorless oil. 99%

Deuterium incorporation was determined by  $^1\text{H}$  NMR.  **$^1\text{H}$  NMR (500 MHz,  $\text{CDCl}_3$ )**  $\delta$  8.33 (s, 1H), 7.91 (q,  $J = 3.5$  Hz, 4H), 7.37 (q,  $J = 3.5$  Hz, 4H);  **$^{13}\text{C}$  NMR (125 MHz,  $\text{CDCl}_3$ )**  $\delta$  131.65, 131.58, 128.14, 128.09, 126.17, 125.83 (t,  $J_{\text{C-D}} = 24.0$  Hz), 125.31; **HRMS** (ESI)  $m/z$  ( $[\text{M}+\text{H}]^+$ ) Calcd. for  $\text{C}_{14}\text{H}_{10}\text{D}$  180.0918, found: 180.0921.

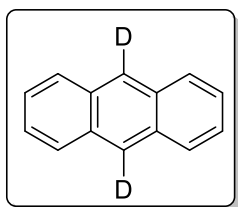

**Anthracene-9,10- $d_2$  (82).** The representative procedure was followed using 9,10-dichloroanthracene (49.2 mg, 0.20 mmol) and  $\text{D}_2\text{O}$  (36  $\mu\text{L}$ , 2.0 mmol). Isolation by column chromatography (*n*-hexane) yielded **82** (29.2 mg, 81 %) as a colorless oil. 86% Deuterium incorporation was determined by  $^1\text{H}$  NMR.  **$^1\text{H}$  NMR (500 MHz,  $\text{CDCl}_3$ )**  $\delta$  8.33 (s, 0.28H), 7.91 (q,  $J = 3.5$  Hz, 4H), 7.37 (q,  $J = 3.5$  Hz, 4H);  **$^{13}\text{C}$  NMR (125 MHz,  $\text{CDCl}_3$ )**  $\delta$  131.65, 131.57, 128.14, 128.09, 126.17, 125.81 (t,  $J_{\text{C-D}} = 24.0$  Hz), 125.30; **HRMS** (ESI)  $m/z$  ( $[\text{M}+\text{H}]^+$ ) Calcd. for  $\text{C}_{14}\text{H}_9\text{D}_2$  181.0981, found: 181.0990.

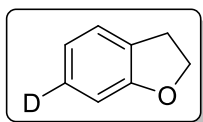

**2,3-Dihydrobenzofuran-6- $d$  (83).** The representative procedure was followed using 6-chloro-2,3-dihydrobenzofuran (30.92 mg, 0.20 mmol) and  $\text{D}_2\text{O}$  (18  $\mu\text{L}$ , 1.0 mmol). Isolation by column chromatography (*n*-hexane : EtOAc = 50 : 1) yielded **83** (18.9 mg, 78 %) as a colorless oil. 99 % Deuterium incorporation was determined by  $^1\text{H}$  NMR.  **$^1\text{H}$  NMR (500 MHz,  $\text{CDCl}_3$ )**  $\delta$  7.21 – 7.20 (m, 1H), 7.12 (d,  $J = 8.5$  Hz, 1H), 6.58 (d,  $J = 8.5$  Hz, 1H), 4.49 (t,  $J = 9.0$  Hz, 2H), 3.12 (t,  $J = 9.0$  Hz, 2H);  **$^{13}\text{C}$  NMR (125 MHz,  $\text{CDCl}_3$ )**  $\delta$  159.23, 130.65, 129.42, 127.83, 112.01, 110.81, 71.52, 29.63; **HRMS** (ESI)  $m/z$  ( $[\text{M}+\text{H}]^+$ ) Calcd. for  $\text{C}_8\text{H}_8\text{DO}$  122.0711, found: 122.0715.

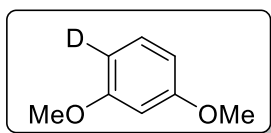

**1,3-Dimethoxybenzene-4-*d* (84)**<sup>4</sup>. The representative procedure was followed using 1-chloro-2,4-dimethoxybenzene (34.52 mg, 0.20 mmol) and D<sub>2</sub>O (18 μL, 1.0 mmol). Isolation by column chromatography (*n*-hexane : EtOAc = 50 : 1) yielded **84** (17.8 mg, 64 %) as a colorless oil. 99 % Deuterium incorporation was determined by <sup>1</sup>H NMR. **<sup>1</sup>H NMR (500 MHz, CDCl<sub>3</sub>)** δ 7.33 (d, *J* = 9.0 Hz, 1H), 6.41 (d, *J* = 2.5 Hz, 1H), 6.32 (dd, *J* = 2.5 Hz, 2.5 Hz, 1H), 3.79 (s, 3H), 3.72 (s, 3H); **<sup>13</sup>C NMR (125 MHz, CDCl<sub>3</sub>)** δ 160.21, 156.52, 133.12, 105.87, 102.43, 99.97, 56.12, 55.54; **HRMS (ESI)** *m/z* ([*M*+*H*]<sup>+</sup>) Calcd. for C<sub>8</sub>H<sub>10</sub>DO<sub>2</sub> 140.0816, found: 140.0821.

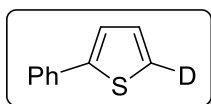

**2-Phenylthiophene-5-*d* (85)**. The representative procedure was followed using 2-chloro-5-phenylthiophene (38.94 mg, 0.20 mmol) and D<sub>2</sub>O (18 μL, 1.0 mmol). Isolation by column chromatography (*n*-hexane : EtOAc = 50 : 1) yielded **85** (26.1 mg, 81 %) as a colorless oil. 95 % Deuterium incorporation was determined by <sup>1</sup>H NMR. **<sup>1</sup>H NMR (500 MHz, CDCl<sub>3</sub>)** δ 7.54 – 7.52 (m, 2H), 7.29 (t, *J* = 7.5 Hz, 2H), 7.22 (d, *J* = 3.5 Hz, 1H), 7.19 (t, *J* = 7.5 Hz, 1.05H), 6.99 (d, *J* = 3.5 Hz, 1H); **<sup>13</sup>C NMR (125 MHz, CDCl<sub>3</sub>)** δ 144.31, 134.39, 128.85, 127.81, 127.42, 125.93, 124.80, 124.57 (t, *J*<sub>C-D</sub> = 24.5 Hz), 123.04; **HRMS (ESI)** *m/z* ([*M*+*H*]<sup>+</sup>) Calcd. for C<sub>10</sub>H<sub>8</sub>DS 162.0482, found: 162.0485.

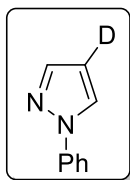

**1-Phenyl-1*H*-pyrazole-4-*d* (86)**. The representative procedure was followed using 4-chloro-1-phenyl-1*H*-pyrazole (35.72 mg, 0.20 mmol) and D<sub>2</sub>O (18 μL, 1.0 mmol). Isolation by column chromatography (*n*-hexane : EtOAc = 50 : 1) yielded **86** (23.8 mg, 82 %) as a colorless oil. More than 99 % Deuterium incorporation was determined by

$^1\text{H}$  NMR.  $^1\text{H}$  NMR (500 MHz,  $\text{CDCl}_3$ )  $\delta$  7.84 (s, 1H), 7.65 – 7.61 (m, 3H), 7.37 (t,  $J$  = 7.5 Hz, 2H), 7.20 (t,  $J$  = 7.5 Hz, 1H);  $^{13}\text{C}$  NMR (125 MHz,  $\text{CDCl}_3$ )  $\delta$  140.94, 140.18, 129.37, 126.61, 126.39, 119.17, 107.37 (t,  $J_{\text{C-D}}$  = 21.0 Hz); HRMS (ESI)  $m/z$  ( $[\text{M}+\text{H}]^+$ ) Calcd. for  $\text{C}_9\text{H}_8\text{DN}_2$  146.0823, found: 146.0821.

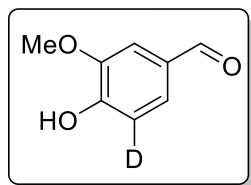

**4-Hydroxy-3-methoxybenzaldehyde-5-*d*** (**87**). The representative procedure was followed using 3-chloro-4-hydroxy-5-methoxybenzaldehyde (37.32 mg, 0.20 mmol) and  $\text{D}_2\text{O}$  (18  $\mu\text{L}$ , 1.0 mmol). Isolation by column chromatography (*n*-hexane : EtOAc = 10 : 1) yielded **87** (24.2 mg, 79 %) as a white solid. 88 % Deuterium incorporation was determined by  $^1\text{H}$  NMR.  $^1\text{H}$  NMR (500 MHz,  $\text{CDCl}_3$ )  $\delta$  9.76 (s, 0.72H), 7.36 (s, 2H), 6.98 – 6.96 (m, 0.12H), 6.15 (s, 1H), 3.90 (s, 3H);  $^{13}\text{C}$  NMR (125 MHz,  $\text{CDCl}_3$ )  $\delta$  190.85, 151.61, 147.12, 129.88, 127.40, 114.35, 114.10 (t,  $J_{\text{C-D}}$  = 25.0 Hz), 108.74, 56.12; HRMS (ESI)  $m/z$  ( $[\text{M}+\text{H}]^+$ ) Calcd. for  $\text{C}_8\text{H}_8\text{DO}_3$  154.0609, found: 154.0611.

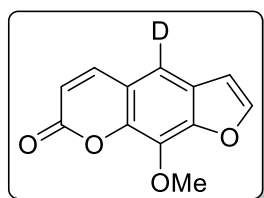

**9-Methoxy-7H-furo[3,2-*g*]chromen-7-one-4-*d*** (**88**). The representative procedure was followed using 4-chloro-9-methoxy-7H-furo[3,2-*g*]chromen-7-one (50.13 mg, 0.20 mmol) and  $\text{D}_2\text{O}$  (18  $\mu\text{L}$ , 1.0 mmol). Isolation by column chromatography (*n*-hexane : EtOAc = 100 : 1) yielded **88** (29.5 mg, 68 %) as a white solid. 90 % Deuterium incorporation was determined by  $^1\text{H}$  NMR.  $^1\text{H}$  NMR (500 MHz,  $\text{CDCl}_3$ )  $\delta$  7.77 (d,  $J$  = 4.7 Hz, 1H), 7.69 (d,  $J$  = 1.3 Hz, 1H), 7.35 (s, 0.1H), 6.82 (d,  $J$  = 1.3 Hz, 1H), 6.37 (d,  $J$  = 4.7 Hz, 1H), 4.30 (s, 3H);  $^{13}\text{C}$  NMR (125 MHz,  $\text{CDCl}_3$ )  $\delta$  160.39, 147.70, 146.60, 144.24, 142.99, 132.77, 126.00, 116.39, 114.71, 112.88, 112.59 (t,  $J_{\text{C-D}}$  = 25.5 Hz), 106.66, 61.29; HRMS (ESI)  $m/z$  ( $[\text{M}+\text{H}]^+$ ) Calcd. for  $\text{C}_{12}\text{H}_8\text{DO}_4$  218.0558, found:

218.0563.

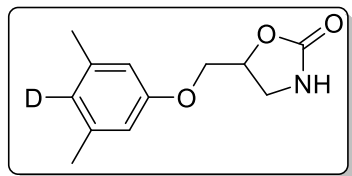

**5-((3,5-Dimethylphenoxy-4-*d*)methyl)oxazolidin-2-one (89).** The representative procedure was followed using 5-((4-chloro-3,5-dimethylphenoxy)methyl)oxazolidin-2-one (51.14 mg, 0.20 mmol) and D<sub>2</sub>O (18  $\mu$ L, 1.0 mmol). Isolation by column chromatography (*n*-hexane : EtOAc = 1 : 1) yielded **89** (27.6 mg, 62 %) as a white solid. 99 % Deuterium incorporation was determined by <sup>1</sup>H NMR. **<sup>1</sup>H NMR (500 MHz, CDCl<sub>3</sub>)**  $\delta$  6.65 (s, 2H), 6.11 (s, 1H), 4.97 – 4.92 (m, 1H), 4.10 – 4.09 (m, 2H), 3.76 (t, *J* = 8.5 Hz, 1H), 3.61 – 3.58 (m, 1H), 2.34 (s, 6H); **<sup>13</sup>C NMR (125 MHz, CDCl<sub>3</sub>)**  $\delta$  159.49, 155.89, 137.32, 127.16, 114.63, 74.13, 68.22, 42.65, 20.88; **HRMS (ESI) *m/z* ([M+H]<sup>+</sup>)** Calcd. for C<sub>12</sub>H<sub>15</sub>DNO<sub>3</sub> 223.1187, found: 223.1190.

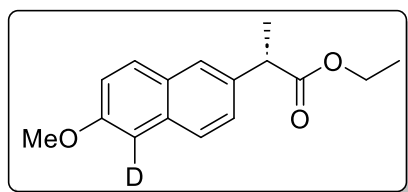

**Ethyl (*S*)-2-(6-methoxynaphthalen-2-yl-5-*d*)propanoate (90).** The representative procedure was followed using ethyl (*S*)-2-(5-chloro-6-methoxynaphthalen-2-yl)propanoate (58.55 mg, 0.20 mmol) and D<sub>2</sub>O (18  $\mu$ L, 1.0 mmol). Isolation by column chromatography (*n*-hexane : EtOAc = 1 : 1) yielded **90** (37.9 mg, 73 %) as a white solid. 99 % Deuterium incorporation was determined by <sup>1</sup>H NMR. **<sup>1</sup>H NMR (500 MHz, CDCl<sub>3</sub>)**  $\delta$  7.60 (t, *J* = 9.0 Hz, 3H), 7.32 (d, *J* = 6.5 Hz, 1H), 7.04 (d, *J* = 9.0 Hz, 1H), 4.08 – 4.00 (m, 2H), 3.80 (s, 3H), 3.74 (q, *J* = 7.0 Hz, 1H), 1.48 (d, *J* = 7.5 Hz, 3H), 1.11 (t, *J* = 7.0 Hz, 3H); **<sup>13</sup>C NMR (125 MHz, CDCl<sub>3</sub>)**  $\delta$  174.62, 157.52, 135.80, 133.55, 129.20, 128.88, 126.99, 126.19, 125.85, 118.88, 105.24 (t, *J*<sub>C-D</sub> = 24.0 Hz), 60.68, 55.24, 45.45, 18.57, 14.09; **HRMS (ESI) *m/z* ([M+H]<sup>+</sup>)** Calcd. for C<sub>16</sub>H<sub>18</sub>DO<sub>3</sub> 260.1391, found: 260.1394.

## 5. General procedure for the synthesis of aryl chlorides

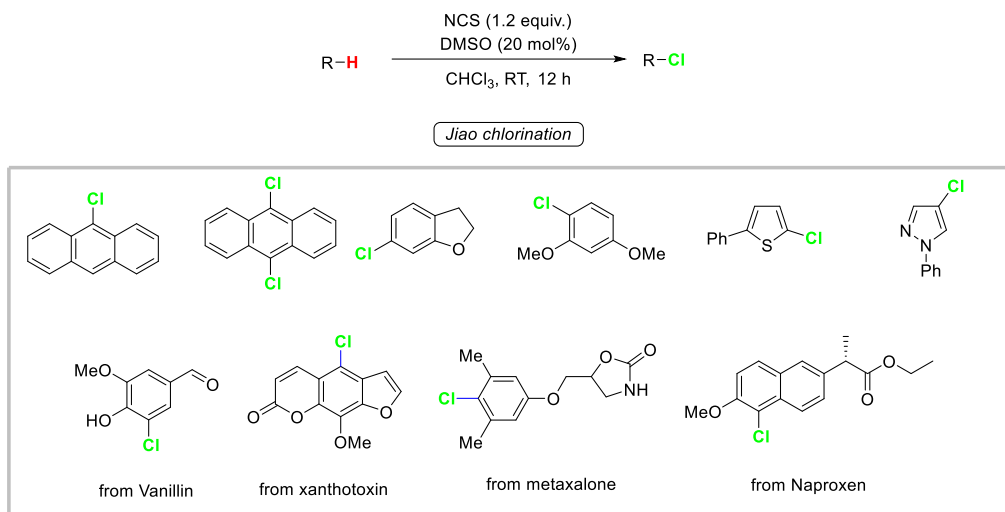

**Synthesis of aryl chlorides via Jiao chlorination:**<sup>20</sup> Aromatic compound (0.5 mmol) and NCS (79.8 mg, 0.6 mmol) were dissolved in  $\text{CHCl}_3$  (2 mL). DMSO (7  $\mu\text{L}$ , 0.1 mmol) was added to the solution under air at 25 °C and the mixture were stirred for the required time. After concentrating in vacuum, the residue was purified by chromatography on silica gel to afford the chlorinated product.

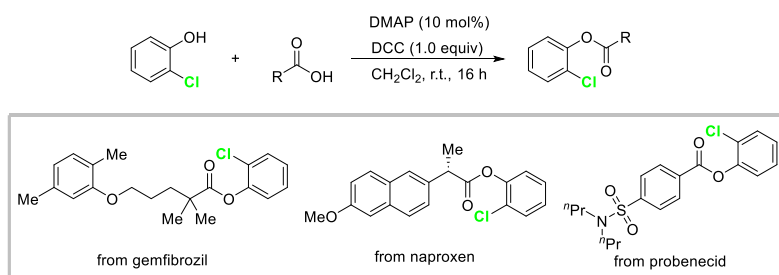

**Synthesis of chloro-substituted esters:**<sup>21</sup> In a 50 mL round-bottomed flask fitted with a magnetic stir bar, a mixture of 2-chlorophenol (0.5 mmol), corresponding acid (0.5 mmol), and DMAP (10 mol%) was dissolved in  $\text{CH}_2\text{Cl}_2$ . The mixture was placed in an ice bath and stirred for 10 min before DCC (0.5 mmol) was added. The mixture was allowed to stir at room temperature for 16 h. The solid precipitate was filtered and washed twice with  $\text{CH}_2\text{Cl}_2$ . The combined organic layers were washed with water, dried over anhydrous  $\text{Na}_2\text{SO}_4$ , filtered, and concentrated under reduced pressure. The residue was purified by flash chromatography on silica gel to afford the corresponding products.

## 6. Mechanistic studies

### 1. Kinetic analysis experiment<sup>22</sup>:

#### 1.1 Ordered in catalyst

To a 10 mL Schlenk tube was added sequentially NiCl<sub>2</sub>·DME (4.0, 5.0, 6.0, 7.5 mol%), 2,9-dimethyl-1,10-phenanthroline (7.5 mol%), Zn powder (40.0 mg, 0.60 mmol). The vessel was evacuated and filled with argon (three times), DMA (0.50 mL) was added *via* syringe and the mixture was stirred at room temperature for 10 min. The deuterated water (1.0 mmol) was added, followed by the addition of chloride **1** (0.20 mmol) in one portion. DMA (0.50 mL) was subsequently added *via* syringe. The resulting solution was stirred for 5 h at room temperature. Over the course of the reaction a GC-MS analysis was acquired every half-an-hour. The 1,3,5-trimethoxybenzene as an internal standard to afford GC-MS yield.

**Supplementary Table 1. Order with respect to NiCl<sub>2</sub>·DME**

| (NiCl <sub>2</sub> ·DME) / mol% | $\Delta[2a] \Delta t^{-1} / 10^{-4} \text{ s}^{-1}$ | $\ln(\Delta[2a] \Delta t^{-1} / 10^{-4} \text{ s}^{-1})$ |
|---------------------------------|-----------------------------------------------------|----------------------------------------------------------|
| 4.0                             | 0.4433                                              | -0.8135                                                  |
| 5.0                             | 0.4478                                              | -0.8034                                                  |
| 6.0                             | 0.4528                                              | -0.7923                                                  |
| 7.5                             | 0.4539                                              | -0.7899                                                  |

#### 1.2 Ordered in **1**

To a 10 mL Schlenk tube was added sequentially NiCl<sub>2</sub>·DME (5.0 mol%), 2,9-dimethyl-1,10-phenanthroline (6.0 mol%), Zn powder (40.0 mg, 0.60 mmol). The vessel was evacuated and filled with argon (three times), DMA (0.50 mL) was added *via* syringe and the mixture was stirred at room temperature for 10 min. The deuterated water (1.0 mmol) was added, followed by the addition of chloride **1** (0.10, 0.15, 0.20, 0.30 mmol) in one portion. DMA (0.50 mL) was subsequently added *via* syringe. The

resulting solution was stirred for 5 h at room temperature. Over the course of the reaction a GC-MS analysis was acquired every half-an-hour. The 1,3,5-trimethoxybenzene as an internal standard to afford GC-MS yield.

**Supplementary Table 2. Order with respect to 1a**

| <b>1 / mmol</b> | <b><math>\Delta[2a] \Delta t^{-1} / 10^{-4} \text{ s}^{-1}</math></b> | <b><math>\ln(\Delta[2a] \Delta t^{-1} / 10^{-4} \text{ s}^{-1})</math></b> |
|-----------------|-----------------------------------------------------------------------|----------------------------------------------------------------------------|
| 0.1             | 0.4712                                                                | -0.7525                                                                    |
| 0.15            | 0.4854                                                                | -0.7228                                                                    |
| 0.2             | 0.4757                                                                | -0.7430                                                                    |
| 0.3             | 0.4779                                                                | -0.7384                                                                    |

### 1.3 Ordered in D<sub>2</sub>O

To a 10 mL Schlenk tube was added sequentially NiCl<sub>2</sub>DME (5.0 mol%), 2,9-dimethyl-1,10-phenanthroline (6.0 mol%), Zn powder (40.0 mg, 0.60 mmol). The vessel was evacuated and filled with argon (three times), DMA (0.50 mL) was added *via* syringe and the mixture was stirred at room temperature for 10 min. The deuterated water (0.6, 1.0, 1.6, 2.0 mmol) was added, followed by the addition of chloride **1** (0.20 mmol) in one portion. DMA (0.50 mL) was subsequently added *via* syringe. The resulting solution was stirred for 5 h at room temperature. Over the course of the reaction a GC-MS analysis was acquired every half-an-hour. The 1,3,5-trimethoxybenzene as an internal standard to afford GC-MS yield.

**Supplementary Table 3. Order with respect to D<sub>2</sub>O**

| <b>D<sub>2</sub>O / mmol</b> | <b><math>\Delta[2a] \Delta t^{-1} / 10^{-4} \text{ s}^{-1}</math></b> | <b><math>\ln(\Delta[2a] \Delta t^{-1} / 10^{-4} \text{ s}^{-1})</math></b> |
|------------------------------|-----------------------------------------------------------------------|----------------------------------------------------------------------------|
| 0.6                          | 0.3617                                                                | -1.0169                                                                    |
| 1.0                          | 0.4557                                                                | -0.7859                                                                    |
| 1.6                          | 0.4307                                                                | -0.8423                                                                    |
| 2.0                          | 0.4266                                                                | -0.8519                                                                    |

## 1.4 Reaction profile

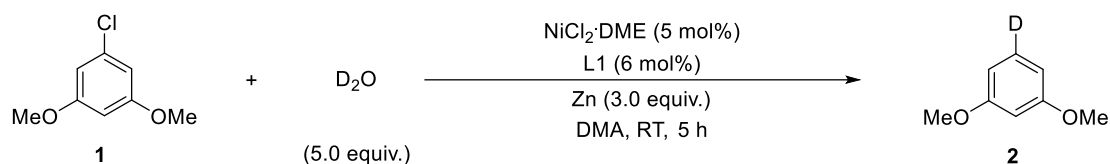

To a 10 mL Schlenk tube was added sequentially  $\text{NiCl}_2\cdot\text{DME}$  (5.0 mol%), 2,9-dimethyl-1,10-phenanthroline (6.0 mol%), Zn powder (40.0 mg, 0.60 mmol). The vessel was evacuated and filled with argon (three times), DMA (0.50 mL) was added *via* syringe and the mixture was stirred at room temperature for 10 min. The deuterated water (20.0 mg, 1.0 mmol) was added, followed by the addition of chloride **1** (0.20 mmol) in one portion. DMA (0.50 mL) was subsequently added *via* syringe. The resulting solution was stirred for 5 h at room temperature. Over the course of the reaction a GC-MS analysis was acquired every half-an-hour. The 1,3,5-trimethoxybenzene as an internal standard to afford GC-MS yield.

**Supplementary Table 3. Reaction profile**

| Time / min | GC-MS yield of <b>1</b> / % | GC-MS yield of <b>2</b> / % |
|------------|-----------------------------|-----------------------------|
| 30         | 96                          | 4                           |
| 60         | 83                          | 17                          |
| 90         | 71                          | 28                          |
| 120        | 56                          | 44                          |
| 150        | 29                          | 71                          |
| 180        | 18                          | 81                          |
| 210        | 1                           | 99                          |
| 240        | 0                           | 99                          |

## 2. Radical experiments:

### 2.1 Synthesis of 1-chloro-2-(4-methylpent-3-en-1-yl)benzene:

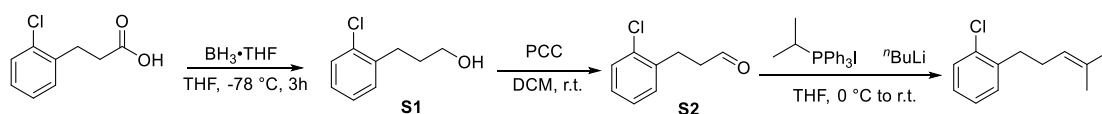

According to the reference<sup>23</sup>, to a solution of acid (1.0 equiv.) in anhydrous THF (0.5 M) at  $-78\text{ }^{\circ}\text{C}$  was added a 1 M solution of  $\text{BH}_3\cdot\text{THF}$  in THF (1.2 equiv.) dropwise.

After stirring at  $-78\text{ }^{\circ}\text{C}$  for 1 h, the reaction temperature was raised to  $0\text{ }^{\circ}\text{C}$  and the reaction was monitored by TLC. Upon completion, the reaction was quenched with excess MeOH. All volatiles were removed under reduced pressure and the residue was purified by flash column chromatography to afford **S1** as colorless oil.

According to the reference<sup>24</sup>, to a mixture of pyridinium chlorochromate (PCC) (2.55 g, 11.8 mmol) and dichloromethane (50 mL), the corresponding alcohol **S1** was added. The resulting mixture was stirred for 1 h under room temperature, when TLC analysis indicated the disappearance of the starting material. The mixture was filtered over silica gel under vacuum, washing with dichloromethane. The solvent was totally removed under reduced pressure, resulting in a yellow oil, which was purified by column chromatography on silica-gel column to obtain the aldehyde **S2** as colorless oil.

According to the reference<sup>25</sup>, a Wittig reaction was conducted to give the final substrates. The phosphonium salt (4.8 mmol, 1.6 equiv) was suspended in THF (9.0 mL) under  $\text{N}_2$  and cooled in an ice bath. A solution of  $n\text{-BuLi}$  (3.0 mmol, 1.0 equiv) was added, and the reaction was stirred at  $0\text{ }^{\circ}\text{C}$  for 30 min. Then, the aldehyde **S2** was added to the flask, and the reaction was stirred at room temperature for 1 h. After this time, 15 mL of  $\text{H}_2\text{O}$  was added, and the reaction mixture was extracted with EtOAc (3 x 15 mL). The organic phase was then washed with brine and dried with  $\text{Na}_2\text{SO}_4$ , and the EtOAc was evaporated under reduced pressure. Purification to remove triphenylphosphine oxide by flash column chromatography yielded the final aryl halide containing the pendant alkene.

## 2.2 Radical trapping experiment:

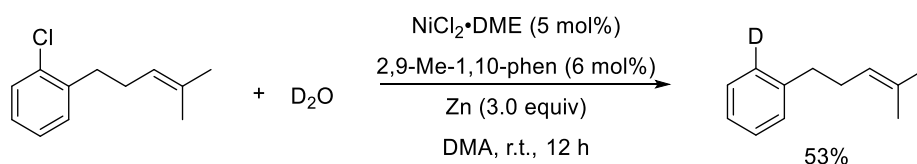

To a 10 mL Schlenk tube was added sequentially  $\text{NiCl}_2\cdot\text{DME}$  (4.41 mg, 0.02 mmol), 2,9-dimethyl-1,10-phenanthroline (5.50 mg, 0.02 mmol), Zn powder (40.0 mg, 0.6 mmol). The vessel was evacuated and filled with argon (three times), DMA (0.50 mL)

was added *via* syringe and the mixture was stirred at room temperature for 10 min. The deuterated water (1.0 – 2.0 mmol) was added, followed by the addition of aryl chloride (0.2 mmol) in one portion. DMA (0.50 mL) was subsequently added *via* syringe. The resulting solution was stirred for 12 h at room temperature. After this time, the crude reaction mixture was diluted with ethyl acetate (10 mL) and washed with water (2.0 mL  $\times$  3). The organic layer was dried over Na<sub>2</sub>SO<sub>4</sub>, filtered, and concentrated. The residue was purified by flash chromatography to get the mixture of aryl chloride and deuterated product. NMR test shown that, there is no cyclization product can be detected in the reaction. The peak in <sup>1</sup>H-NMR 5.10 (q, *J* = 2.0 Hz, 1.91 H) showed no cyclization product can be detected. Suggested that no aryl radical generated in this condition.

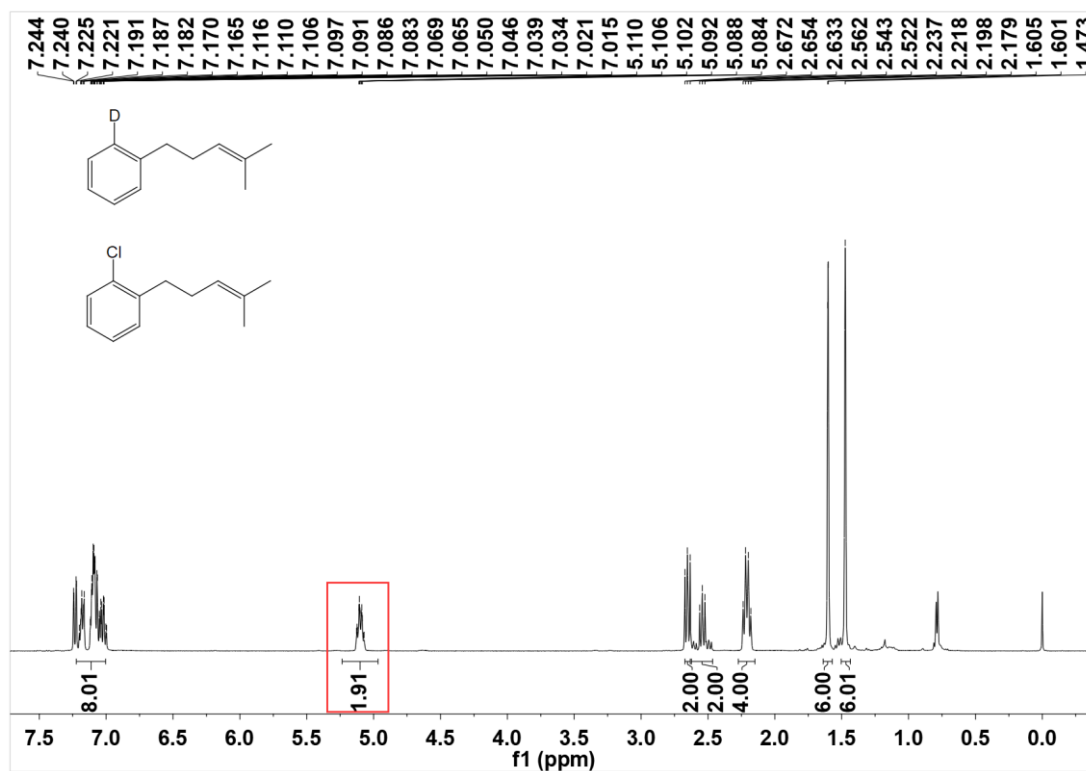

### 3. Reactions with various reductants:

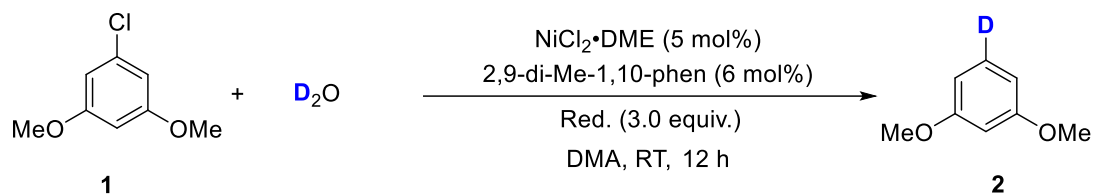

| entry | Red.                                                             | yield (D inc-) |
|-------|------------------------------------------------------------------|----------------|
| 1     | Zn                                                               | 99% (>99%)     |
| 2     | Mn                                                               | 70% (80%)      |
| 3     | Fe                                                               | 8%             |
| 4     | B <sub>2</sub> Pin <sub>2</sub> + K <sub>3</sub> PO <sub>4</sub> | 4%             |
| 5     | TDAE                                                             | 5%             |
| 6     | none                                                             | n.d.           |

To a 10 mL Schlenk tube was added sequentially NiCl<sub>2</sub>·DME (2.20 mg, 0.010 mmol), 2,9-dimethyl-1,10-phenanthroline (2.50 mg, 0.012 mmol), reductant (3.0 equiv., 0.6 mmol). The vessel was evacuated and filled with argon (three times), DMA (0.50 mL) was added *via* syringe and the mixture was stirred at room temperature for 10 min. The deuterated water (20.0 mg, 1.0 mmol, 5.0 equiv.) was added, followed by the addition of 1-chloro-3,5-dimethoxybenzene (34.52 mg, 0.20 mmol) in one portion. DMA (0.50 mL) was subsequently added *via* syringe. The resulting solution was stirred for 12 h at room temperature. After this time, the crude reaction mixture was diluted with ethyl acetate (10 mL) and washed with water (2.0 mL × 3). A 0.2 mL of solution was collected, diluted with ethyl acetate (1.0 mL), and analyzed by GC. The yield was determined versus the internal standard (1,3,5-trimethoxybenzene), the D-incorporation was determined by GC-MS fragment peak.

#### 4. Organozinc intermediate experiment:

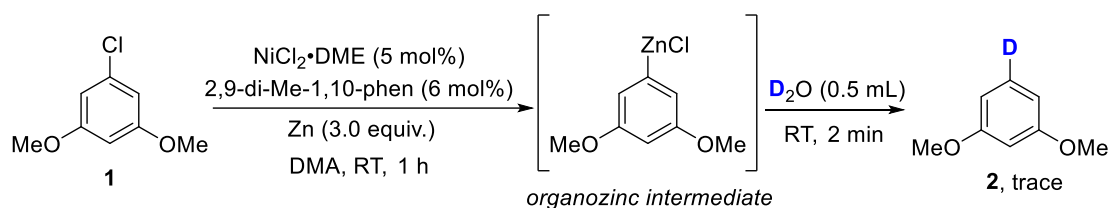

To a 10 mL Schlenk tube was added sequentially  $\text{NiCl}_2\cdot\text{DME}$  (2.20 mg, 0.010 mmol), 2,9-dimethyl-1,10-phenanthroline (2.50 mg, 0.012 mmol), zinc powder (40.0 mg, 0.6 mmol). The vessel was evacuated and filled with argon (three times), DMA (0.50 mL) was added *via* syringe and the mixture was stirred at room temperature for 10 min. The 1-chloro-3,5-dimethoxybenzene (34.52 mg, 0.20 mmol) in one portion. DMA (0.50 mL) was subsequently added *via* syringe. The resulting solution was stirred for 1 h at room temperature. After this time, deuterated water (20.0 mg, 1.0 mmol, 5.0 equiv.) was added under argon protect condition, and then stirred for 2 min. The crude reaction mixture was diluted with ethyl acetate (10 mL) and washed with water (2.0 mL  $\times$  3). A 0.2 mL of solution was collected, diluted with ethyl acetate (1.0 mL), and analyzed by GC. The yield was determined versus the internal standard (1,3,5-trimethoxybenzene). The result showed that trace target substrate **2** was detected, suggesting that no organozinc intermediate was involved in this reaction.

#### 5. Sequential Negishi experiment<sup>26</sup>:

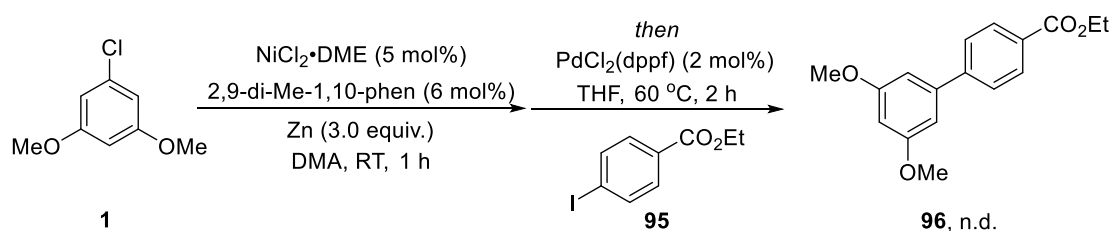

To a 10 mL Schlenk tube was added sequentially  $\text{NiCl}_2\cdot\text{DME}$  (2.20 mg, 0.01 mmol), 2,9-dimethyl-1,10-phenanthroline (2.80 mg, 0.01 mmol), Zn powder (40.0 mg, 0.6 mmol). The vessel was evacuated and filled with argon (three times), DMA (0.50 mL) was added *via* syringe and the mixture was stirred at room temperature for 10 min. The deuterated water (20.0 mg, 1.0 mmol) was added, followed by the addition of 1-chloro-3,5-dimethoxybenzene (34.52 mg, 0.20 mmol) in one portion. DMA (0.50 mL) was

subsequently added *via* syringe. The resulting solution was stirred for 12 h at room temperature. After this time, the mixture was filtered, and the liquid was collected. To a reaction tube equipped with a stir bar was added PdCl<sub>2</sub>(dppf) (4.4 mg, 0.02 mmol) and aryl iodide **96** (27.0 mg, 0.1 mmol). The vessel was evacuated and filled with argon (three times), THF (0.5 mL) and above obtained liquid was added, the mixture was stirred at 60 °C for 2 h, diluted with ethyl acetate (10 mL), washed with H<sub>2</sub>O and brine, and dried over anhydrous Na<sub>2</sub>SO<sub>4</sub>. A 0.2 mL of solution was collected, diluted with ethyl acetate (1.0 mL), and analyzed by GC-MS. The result showed that no target substrate **96** detected, further suggesting that no organic-zinc intermediate was involved in this reaction.

## 6. Hydrogen reduction experiment<sup>27</sup>:

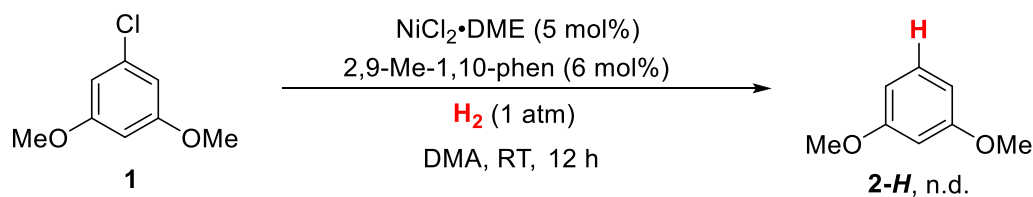

To a 10 mL Schlenk tube was added sequentially NiCl<sub>2</sub>DME (2.20 mg, 0.010 mmol), 2,9-dimethyl-1,10-phenanthroline (2.50 mg, 0.012 mmol), zinc powder (40.0 mg, 0.6 mmol). The vessel was evacuated and filled with H<sub>2</sub> (three times). DMA (0.50 mL) was added *via* syringe and the mixture was stirred at room temperature for 10 min. The 1-chloro-3,5-dimethoxybenzene (34.52 mg, 0.20 mmol) in one portion. DMA (0.50 mL) was subsequently added *via* syringe. The resulting solution was stirred for 12 h at room temperature. After this time, the crude reaction mixture was diluted with ethyl acetate (10 mL) and washed with water (2.0 mL × 3). A 0.2 mL of solution was collected, diluted with ethyl acetate (1.0 mL), and analyzed by GC-MS. The result showed that no target product **2** was formed.

## 7. Kinetic isotope effect experiments:

### 7.1 Competitive kinetic isotope effect experiments<sup>28</sup>:

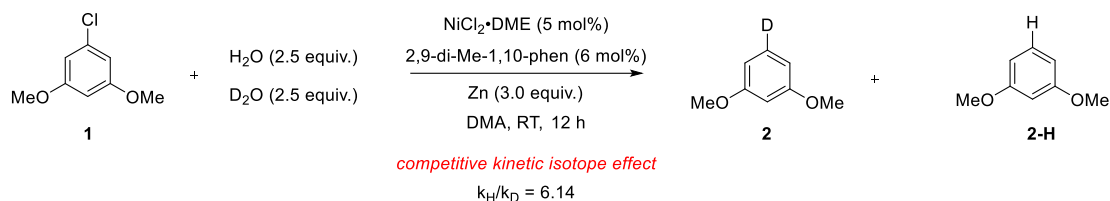

To a 10 mL Schlenk tube was added sequentially NiCl<sub>2</sub>·DME (2.20 mg, 0.01 mmol), 2,9-dimethyl-1,10-phenanthroline (2.80 mg, 0.01 mmol), Zn powder (40.0 mg, 0.6 mmol). The vessel was evacuated and filled with argon (three times), DMA (0.50 mL) was added *via* syringe and the mixture was stirred at room temperature for 10 min. The deuterated water (10.0 mg, 0.5 mmol) and water (9.0 mg, 0.5 mmol) was added, followed by the addition of 1-chloro-3,5-dimethoxybenzene (34.52 mg, 0.20 mmol) in one portion. DMA (0.50 mL) was subsequently added *via* syringe. The resulting solution was stirred for 12 h at room temperature. After this time, the crude reaction mixture was diluted with ethyl acetate (10 mL) and washed with water (2.0 mL × 3). The organic layer was dried over Na<sub>2</sub>SO<sub>4</sub>, filtered, and concentrated. The residue was purified by flash chromatography. The KIE value was calculated according to the analysis of purified crude <sup>1</sup>H NMR: 14% deuterium incorporation was detected in **2**, indicated the KIE value is 0.86/0.14=6.14.

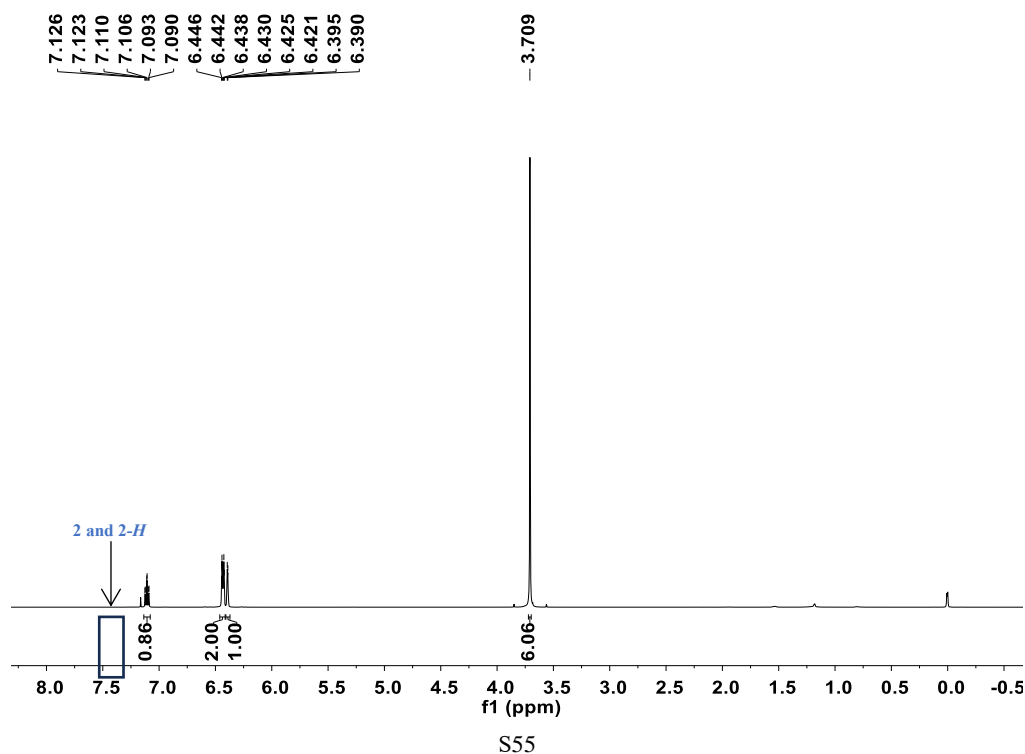

## 7.2 parallel kinetic isotope effect experiments<sup>29</sup>:

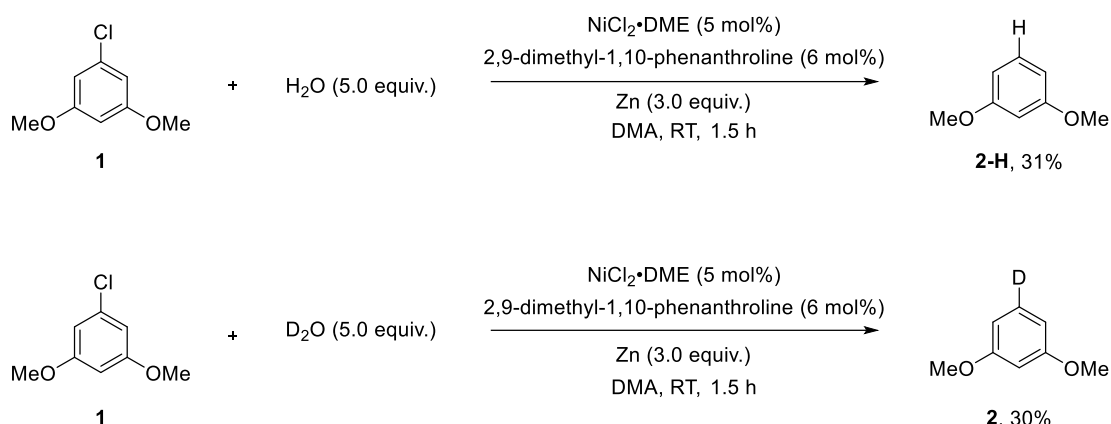

*parallel kinetic isotope effect*

$$k_{\text{H}}/k_{\text{D}} = 1.03$$

To a 10 mL Schlenk tube was added sequentially NiCl<sub>2</sub>·DME (2.20 mg, 0.01 mmol), 2,9-dimethyl-1,10-phenanthroline (2.80 mg, 0.01 mmol), Zn powder (40.0 mg, 0.6 mmol). The vessel was evacuated and filled with argon (three times), DMA (0.50 mL) was added *via* syringe and the mixture was stirred at room temperature for 10 min. The deuterated water (20.0 mg, 1.0 mmol) or water (18.0 mg, 1.0 mmol) was added, followed by the addition of 1-chloro-3,5-dimethoxybenzene (34.52 mg, 0.20 mmol) in one portion. DMA (0.50 mL) was subsequently added *via* syringe. The resulting solution was stirred for 1.5 h at room temperature. After this time, the crude reaction mixture was diluted with ethyl acetate (10 mL) and washed with water (2.0 mL × 3). 1,3,5-Trimethoxybenzene (33.6 mg, 0.2 mmol) was added as internal standard to afford GC-MS yield. The GC-MS yield of **2-H** is 31%. The GC-MS yield of **2** is 30%. The KIE value is 1.03, revealing that C–D bond formation is not the rate-determining step.

## 8. Competitive experiments:

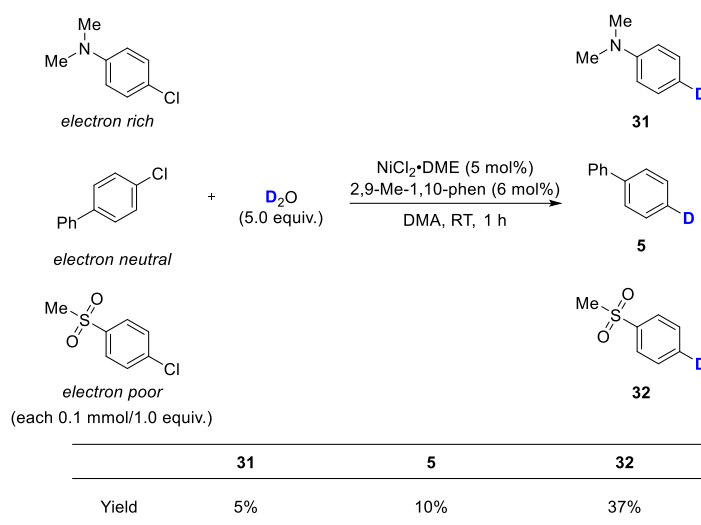

To a 10 mL Schlenk tube was added sequentially  $NiCl_2 \cdot DME$  (3.30 mg, 0.015 mmol), 2,9-dimethyl-1,10-phenanthroline (3.75 mg, 0.018 mmol), zinc powder (58.5 mg, 0.9 mmol). The vessel was evacuated and filled with argon (three times). DMA (0.50 mL) was added *via* syringe and the mixture was stirred at room temperature for 10 min. The deuterated water (30.0 mg, 1.5 mmol, 5.0 equiv.) was added, followed by the addition of three aryl chlorides (each of 0.1 mmol, 1.0 equiv.) in one portion. DMA (0.50 mL) was subsequently added *via* syringe. The resulting solution was stirred for 1 h at room temperature. After this time, the crude reaction mixture was diluted with ethyl acetate (10 mL) and washed with water (2.0 mL  $\times$  3). A 0.2 mL of solution was collected, diluted with ethyl acetate (1.0 mL), and analyzed by GC-MS. The yields were determined versus the internal standard (1,3,5-trimethoxybenzene).

## 9. Experiments with deuterated solvents:

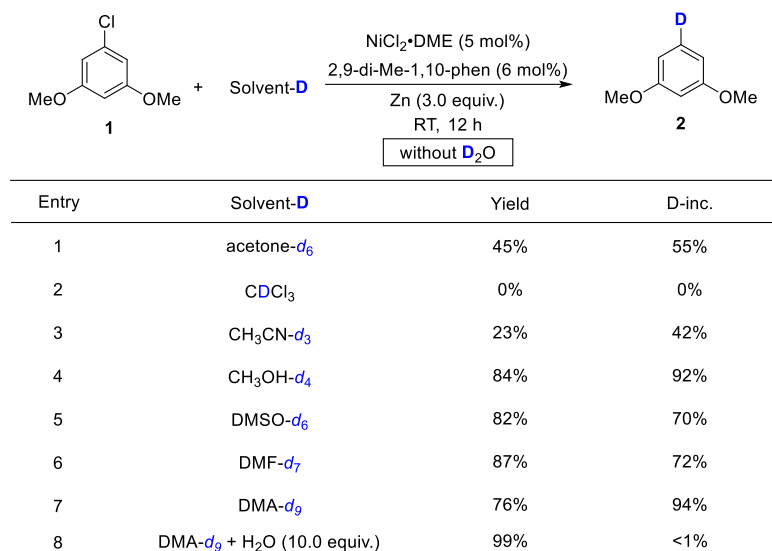

To a 10 mL Schlenk tube was added sequentially NiCl<sub>2</sub>·DME (2.20 mg, 0.010 mmol), 2,9-dimethyl-1,10-phenanthroline (2.50 mg, 0.012 mmol), zinc powder (40.0 mg, 0.6 mmol). The vessel was evacuated and filled with argon (three times), Solvent-D (0.5 mL) was added *via* syringe and the mixture was stirred at room temperature for 10 min, followed by the addition of 1-chloro-3,5-dimethoxybenzene (34.52 mg, 0.20 mmol) in one portion. The resulting solution was stirred for 12 h at room temperature. After this time, the crude reaction mixture was diluted with ethyl acetate (10 mL) and washed with water (2.0 mL × 3). A 0.2 mL of solution was collected, diluted with ethyl acetate (1.0 mL), and analyzed by GC-MS. The yield was determined versus the internal standard (1,3,5-trimethoxybenzene), the D-incorporation was determined by <sup>1</sup>H NMR.

## 10. Experiments for Ni(I) and Ni(0) catalysis:

### 10.1 Preparation of Ni(phen)<sub>2</sub>:

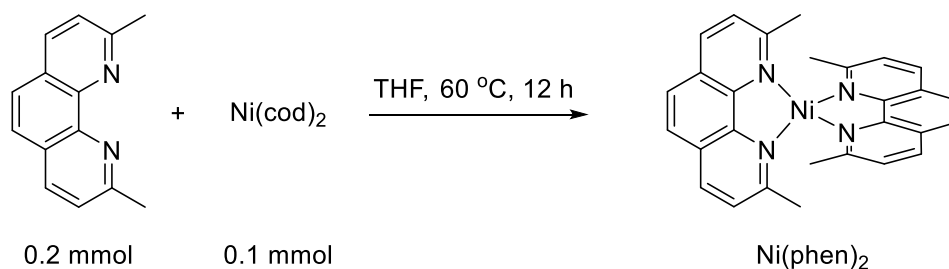

This compound was prepared according to the literature procedure.<sup>30</sup> In an argon-filled glove box, to a 50 mL round bottom flask equipped with a magnetic stir bar was

added Ni(cod)<sub>2</sub> (27.5 mg, 0.1 mmol), 2,9-dimethyl-1,10-phenanthroline (41.7 mg, 0.2 mmol), and dry THF (5 mL). It was sealed and removed from the glove box. The reaction mixture was stirred at 60 °C for 12 h. The reaction mixture turned from a pale-yellow suspension to an inky purple solution. The reaction mixture was filtered through celite, and the celite was washed with THF in glove box. The filtrate was concentrated in vacuum to afford Ni(phen)<sub>2</sub> as an air-sensitive dark solid (33.3 mg, 70% yield).

**Note:** The complex is sensitive to air and moisture in the solid state and is unstable in solution at ambient temperature.

## 10.2 Preparation of Ni(phen)<sub>2</sub>Cl:

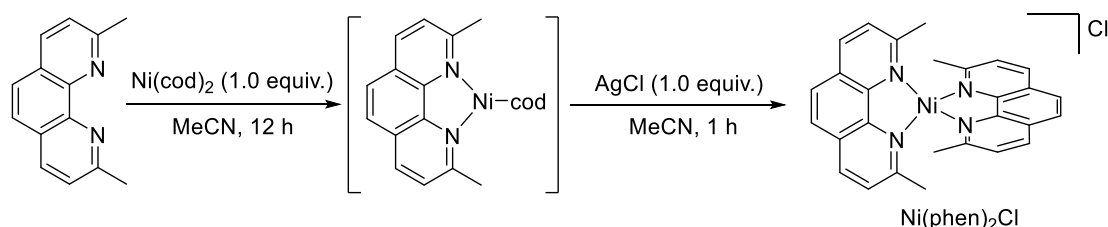

This compound was prepared according to the literature procedure.<sup>30</sup> In an argon-filled glove box, to a 50 mL round bottom flask equipped with a magnetic stir bar was added Ni(cod)<sub>2</sub> (54.8 mg, 0.2 mmol), 2,9-dimethyl-1,10-phenanthroline (72.0 mg, 0.2 mmol), and dry CH<sub>3</sub>CN (10 mL). The reaction mixture was stirred for 12 h, and it was changed from a pale-yellow suspension to an inky purple solution. AgCl (28.6 mg, 1.0 equiv) was added. The reaction solution immediately turned from dark purple to deep blue. The reaction mixture was stirred for 1 h before being filtered through celite. The celite was washed with THF glove box, and the filtrate was concentrated in vacuum to afford a gray solid. It was treated with dry THF, and the insoluble powder was removed by filtration. The solvent was removed in vacuum to afford Ni(phen)<sub>2</sub>Cl as an air sensitive gray solid (56.1 mg, 55% yield).

**Note:** The complex is sensitive to air and moisture in the solid state and is unstable in solution at ambient temperature.

### 10.3 Stoichiometric reactions of **1** and deuterium water with Ni(phen)<sub>2</sub> or Ni(phen)<sub>2</sub>Cl

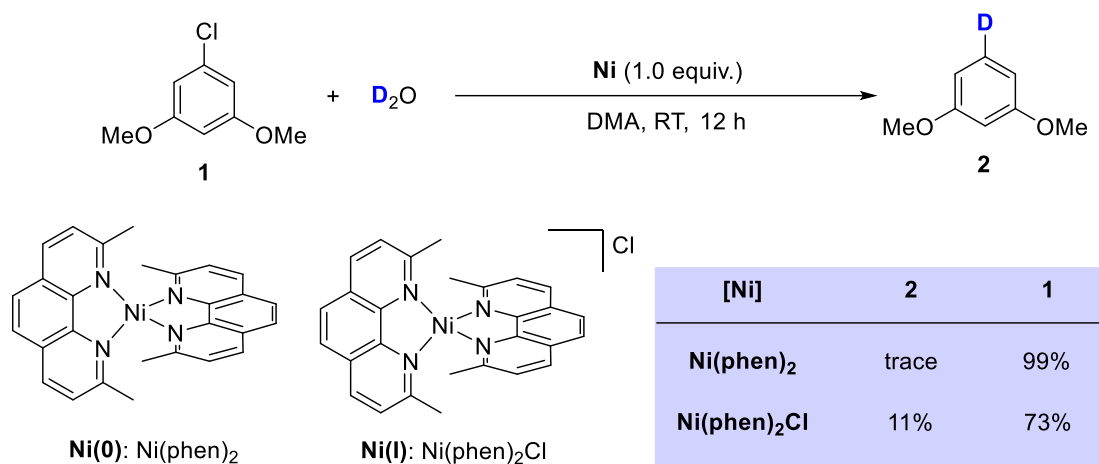

The reaction was conducted in an Ar-filled glovebox. To a reaction tube equipped with a stir bar was added Ni(phen)<sub>2</sub> (47.4 mg, 0.1 mmol) or Ni(phen)<sub>2</sub>Cl (50.9 mg, 0.1 mmol). A solution of 1-chloro-3,5-dimethoxybenzene **1** (17.2 mg, 0.1 mmol) and deuterium water (9 μL, 0.5 mmol) in DMA (1.0 mL) was added. The reaction tube was sealed and removed from the glove box, and the reaction mixture was stirred at room temperature for 12 h. Diluted with ethyl acetate (10 mL), washed with H<sub>2</sub>O and brine, and dried over anhydrous Na<sub>2</sub>SO<sub>4</sub>. A 0.2 mL of solution was collected, diluted with ethyl acetate (1.0 mL), and analyzed by GC-MS. The yield was determined versus the internal standard (1,3,5-trimethoxybenzene).

### 11. Transformation of Ni<sup>0</sup> species

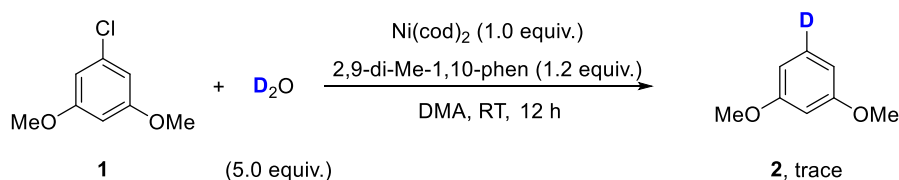

To a 10 mL Schlenk tube was added sequentially Ni(cod)<sub>2</sub> (55.0 mg, 0.20 mmol), 2,9-dimethyl-1,10-phenanthroline (50.0 mg, 0.24 mmol). The vessel was evacuated and filled with argon (three times), DMA (0.50 mL) was added *via* syringe and the mixture was stirred at room temperature for 10 min. The deuterated water (20.0 mg, 1.0 mmol) was added, followed by the addition of 1-chloro-3,5-dimethoxybenzene **1** (34.4 mg, 0.2

mmol) in one portion. DMA (0.50 mL) was subsequently added *via* syringe. The resulting solution was stirred for 12 h at room temperature. After this time, the crude reaction mixture was diluted with ethyl acetate (10 mL) and washed with water (2.0 mL  $\times$  3). A 0.2 mL of solution was collected, diluted with ethyl acetate (1.0 mL), and analyzed by GC-MS. The result showed that trace target product **2** was detected.

## 12. Catalytic reactions with Ni<sup>II</sup> complex

### 12.1 Preparation of Ar–Ni<sup>II</sup>(2,9-di-Me-1,10-phen)Cl:

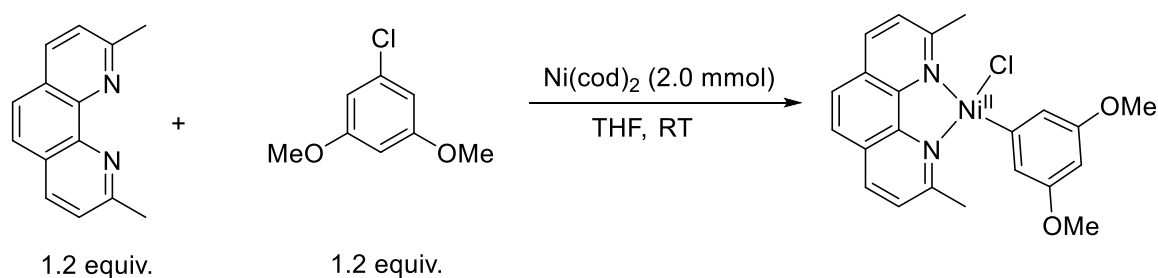

This compound was prepared according to the literature procedure.<sup>31</sup> In a nitrogen-filled glove box, Ni(cod)<sub>2</sub> (550 mg, 2 mmol), 2,9-dimethyl-1,10-phenanthroline (499.8 mg, 2.4 mmol), and THF (40 mL) were added to a dry round bottom flask. The resulting mixture was then stirred at RT for 20 h. After this time, 1-chloro-3,5-dimethoxybenzene (414 mg, 2.4 mmol) was added, and reaction was stirred in the glovebox at RT for 2 h. The resulting solution was concentrated in vacuo, and the resulting dark blue solid was triturated with pentanes to remove residual cyclooctadiene and aryl halide to afford complex in 35% yield.

**Note:** The complex is sensitive to air and moisture in the solid state and is unstable in solution at ambient temperature.

## 12.2 Stoichiometric reactions of **1** and deuterium water with Ar–Ni<sup>II</sup>(2,9-di-Me-1,10-phen)Cl

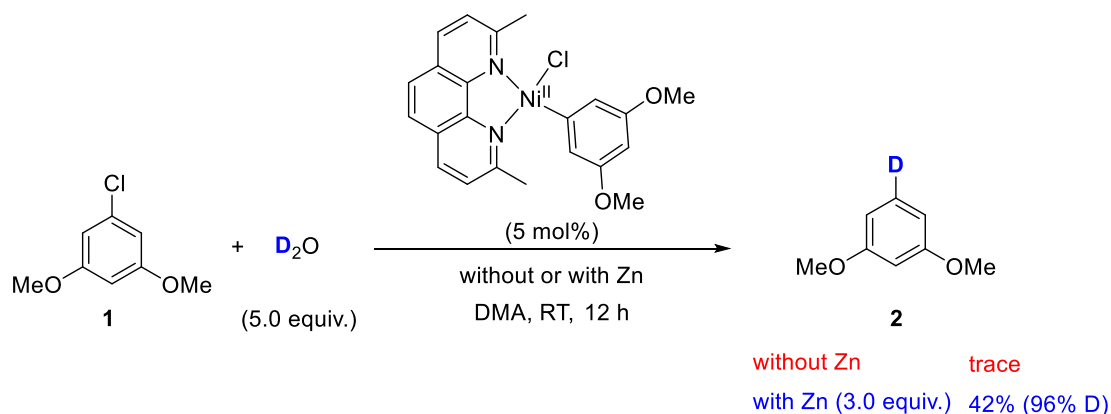

In an argon-filled glove box, prepare two 10 mL Schlenk tube, both of them added Ar–Ni<sup>II</sup>(2,9-di-Me-1,10-phen)Cl (4.4 mg, 0.01 mmol), and one of tube added the additional of zinc powder (20.0 mg, 6.0 mmol). DMA (0.50 mL) was added in two tubes *via* syringe and the mixture was stirred at room temperature for 10 min. The deuterated water (20.0 mg, 1.0 mmol) and 1-chloro-3,5-dimethoxybenzene **1** (34.4 mg, 0.2 mmol) was added in two tubes. DMA (0.50 mL) was subsequently added *via* syringe. The resulting solution was stirred for 12 h at room temperature. After this time, the crude reaction mixture was diluted with ethyl acetate (10 mL) and washed with water (2.0 mL  $\times$  3). A 0.2 mL of solution was collected, diluted with ethyl acetate (1.0 mL), and analyzed by GC-MS. The yield was determined versus the internal standard (1,3,5-trimethoxybenzene), the D-incorporation was determined by <sup>1</sup>H NMR.

## 7. NMR Spectra

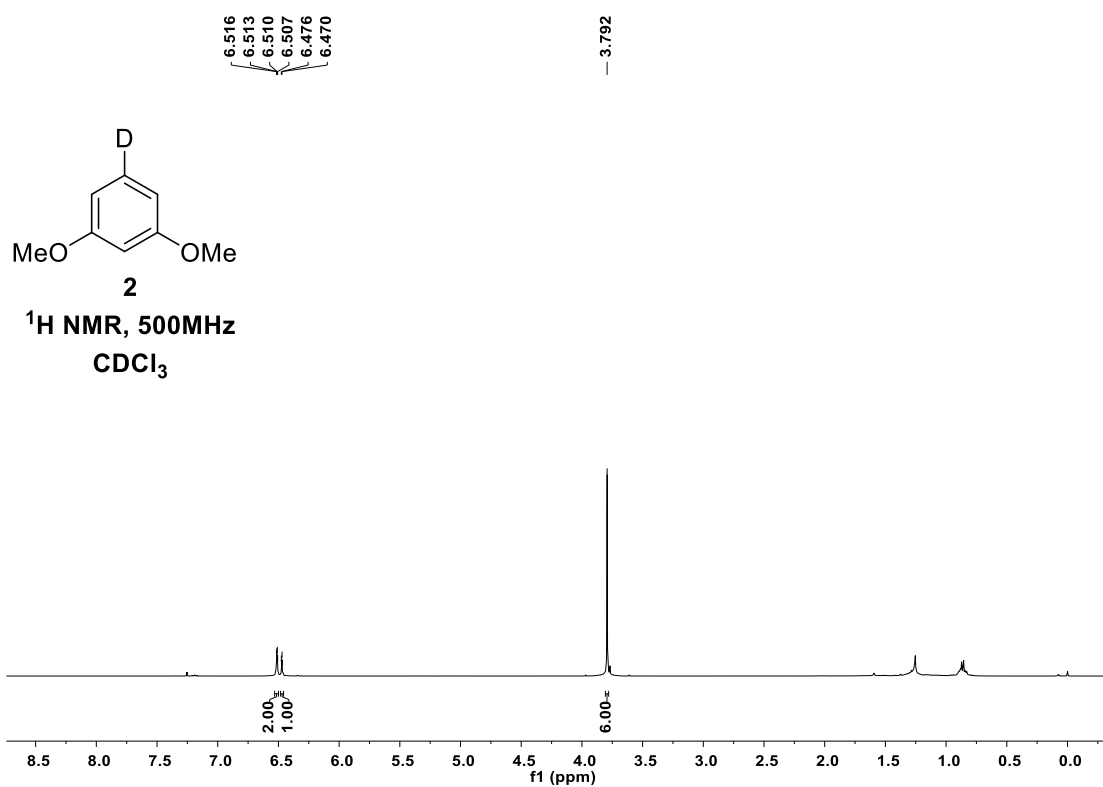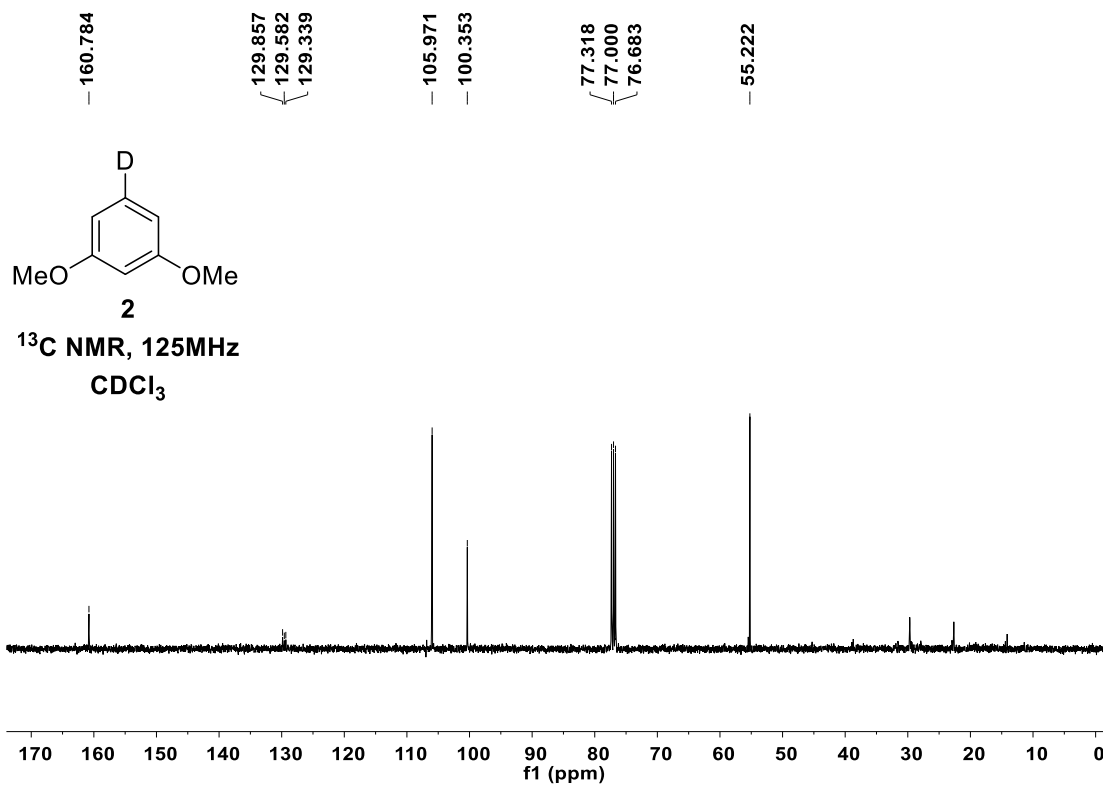

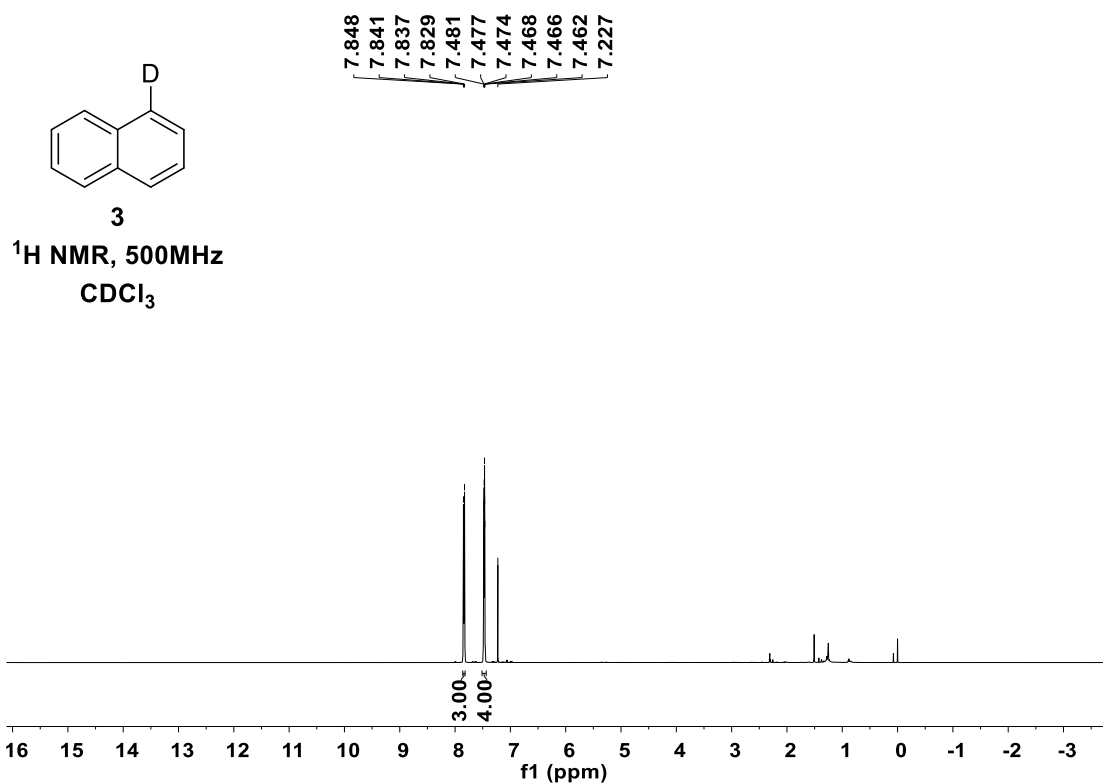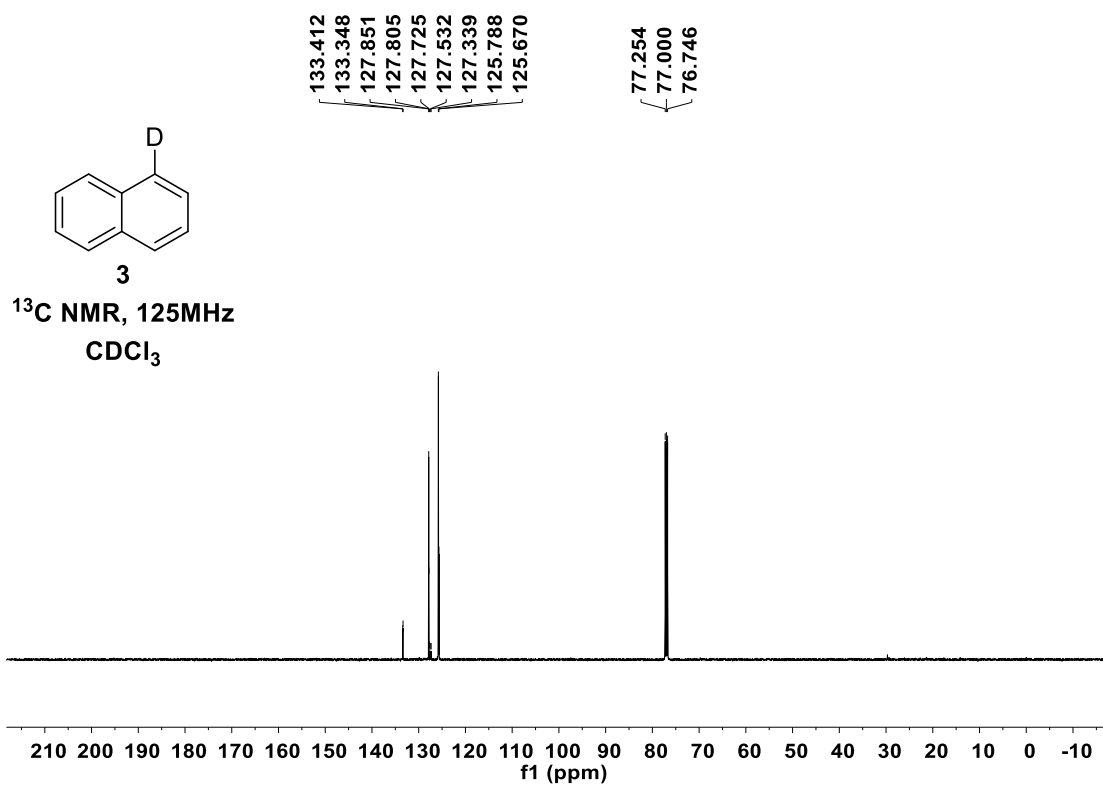

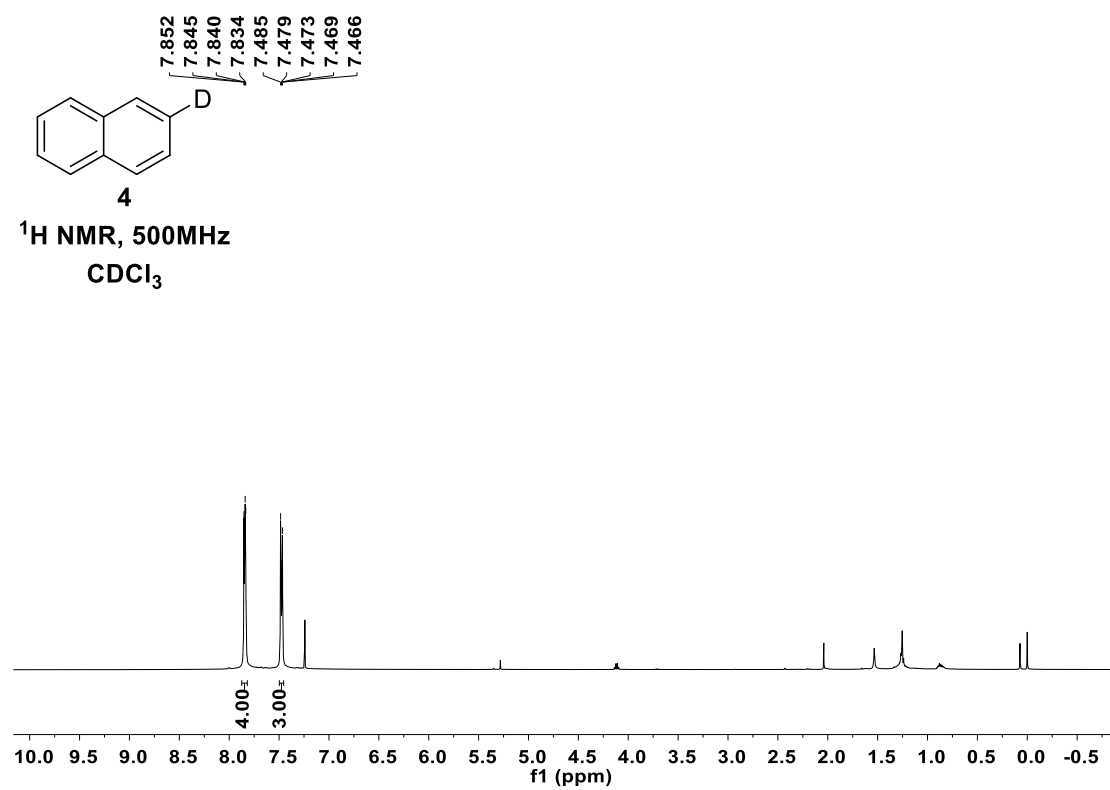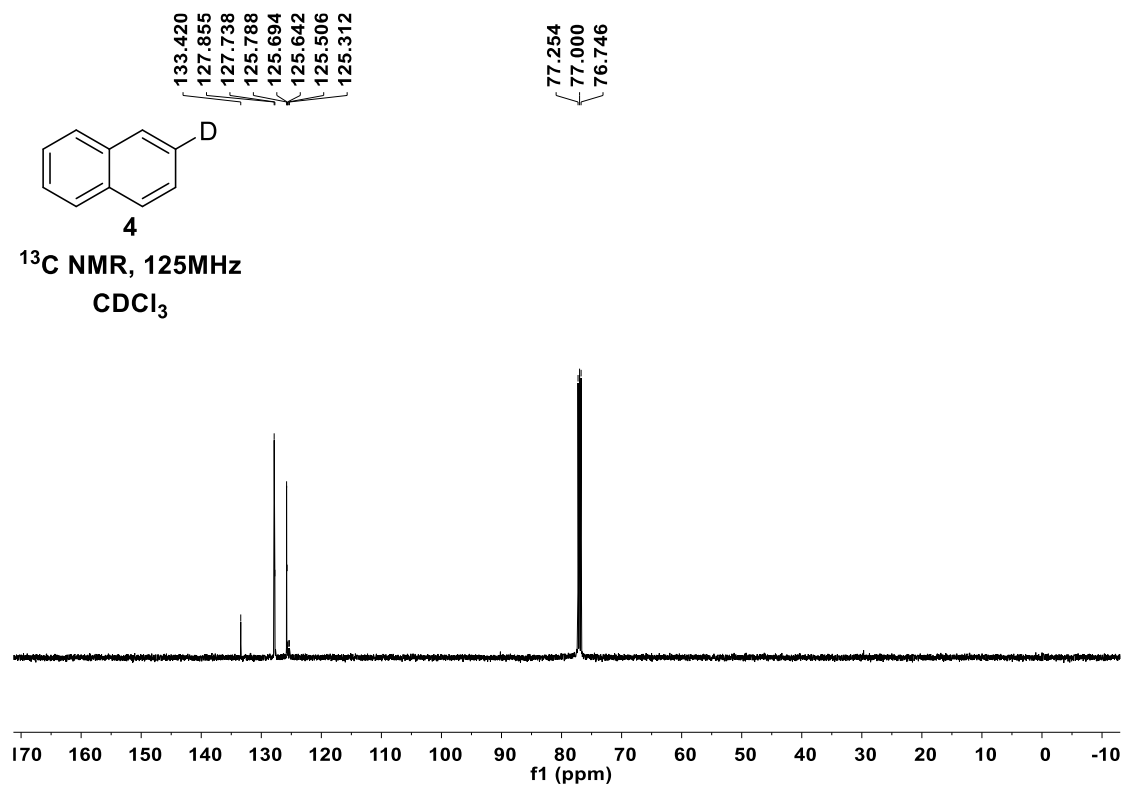

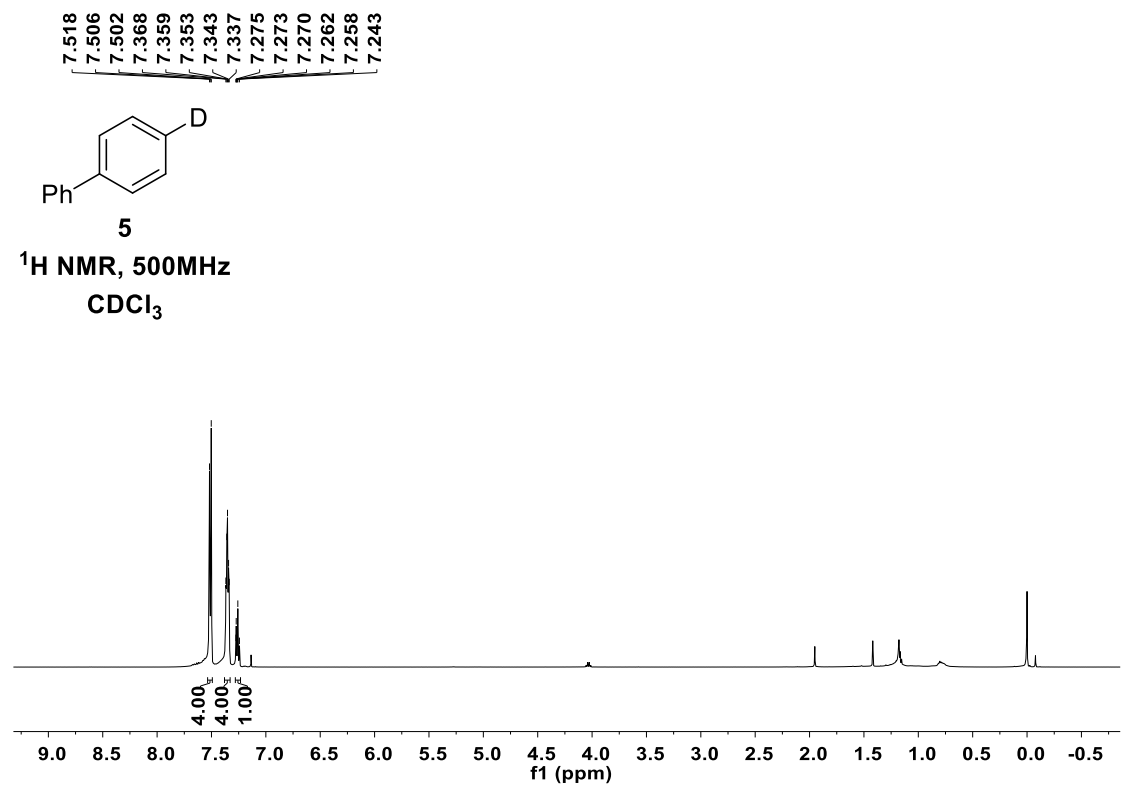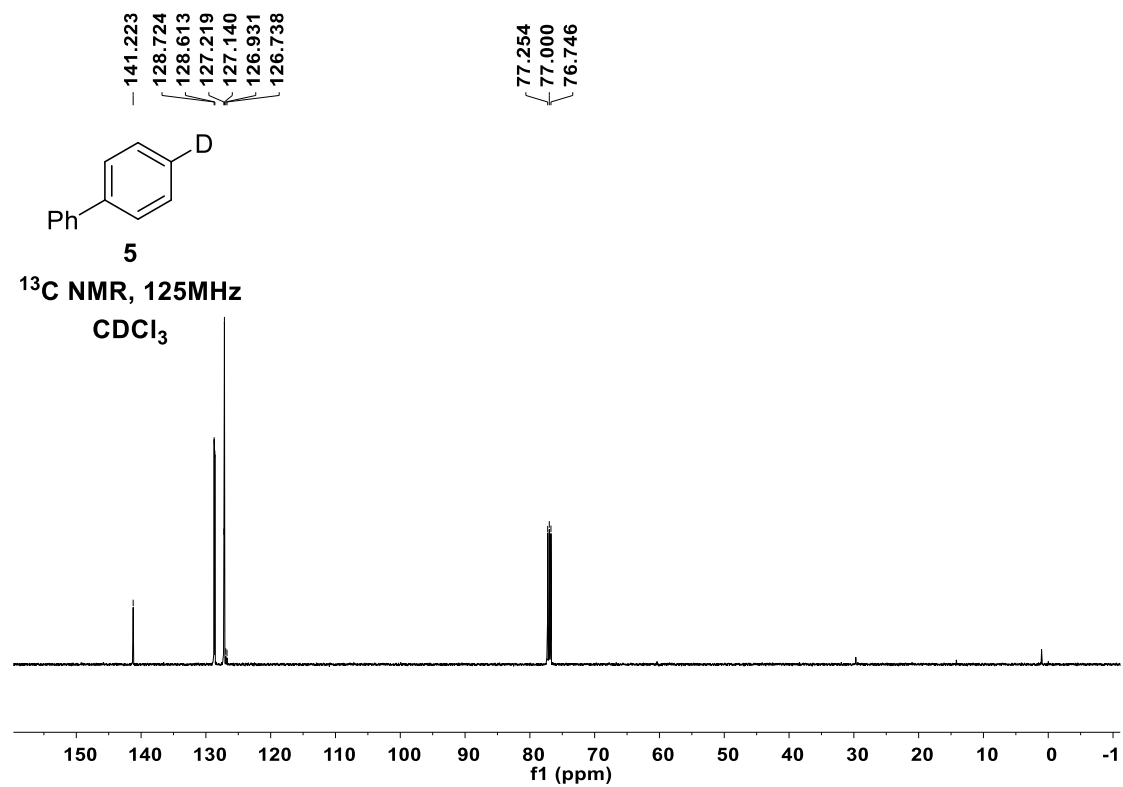

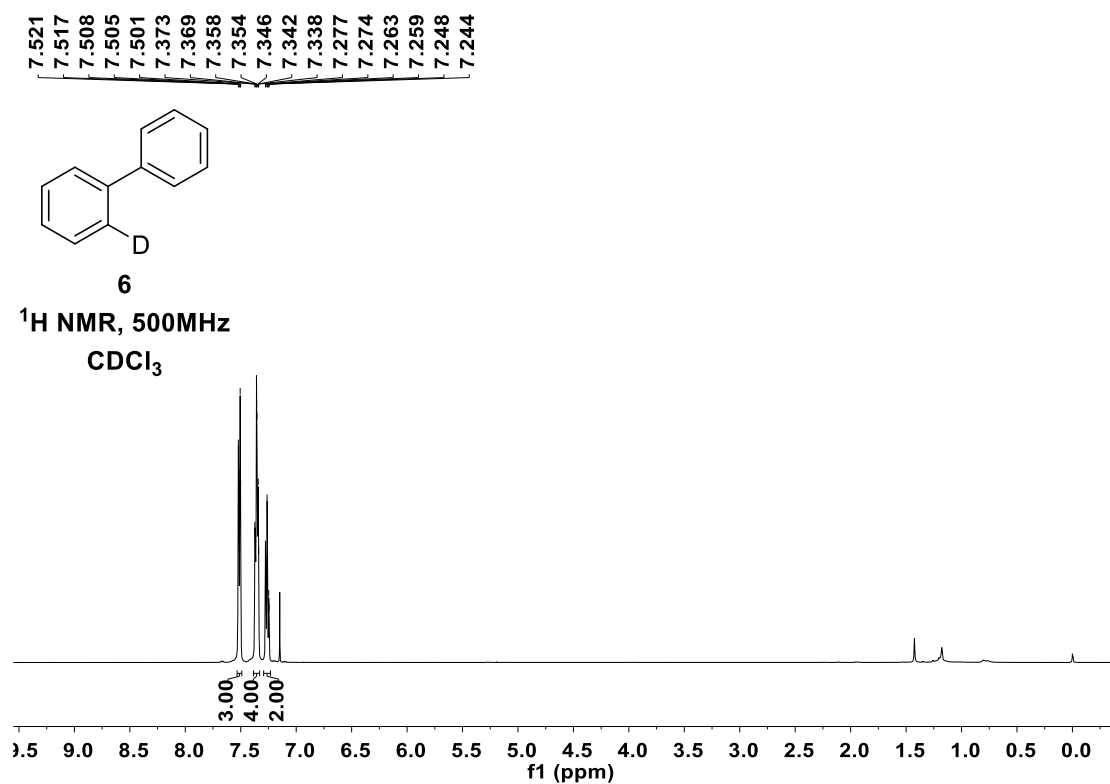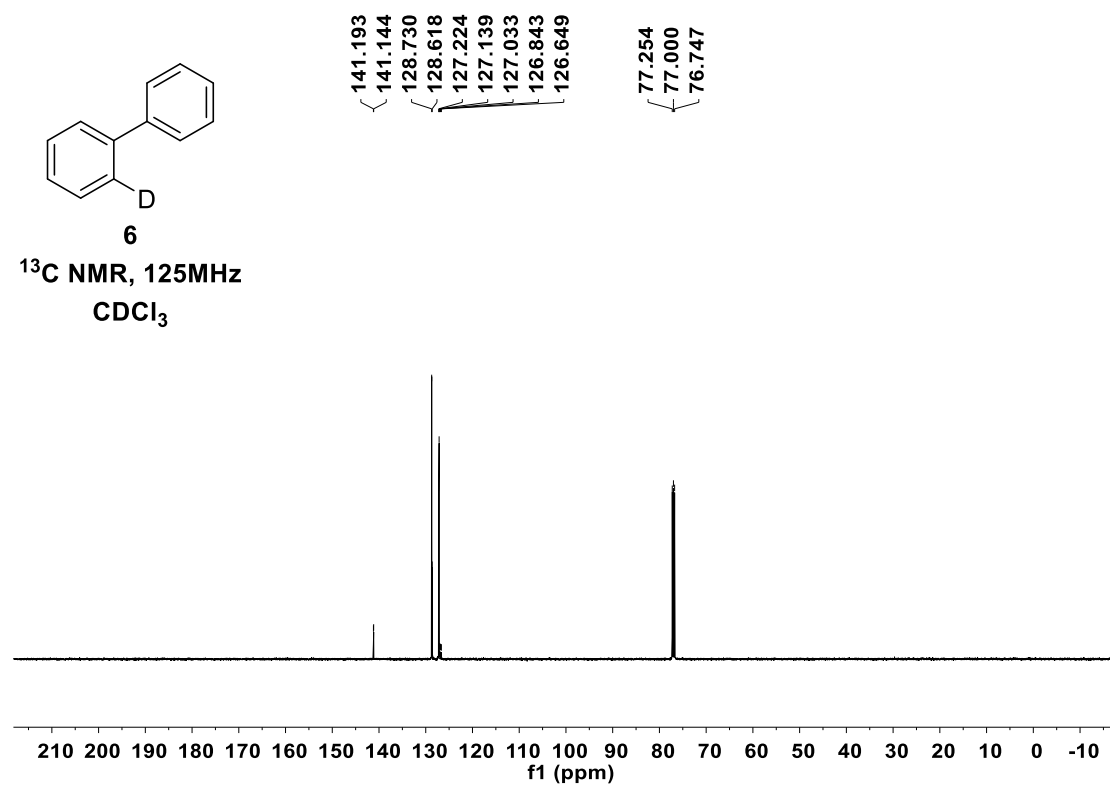

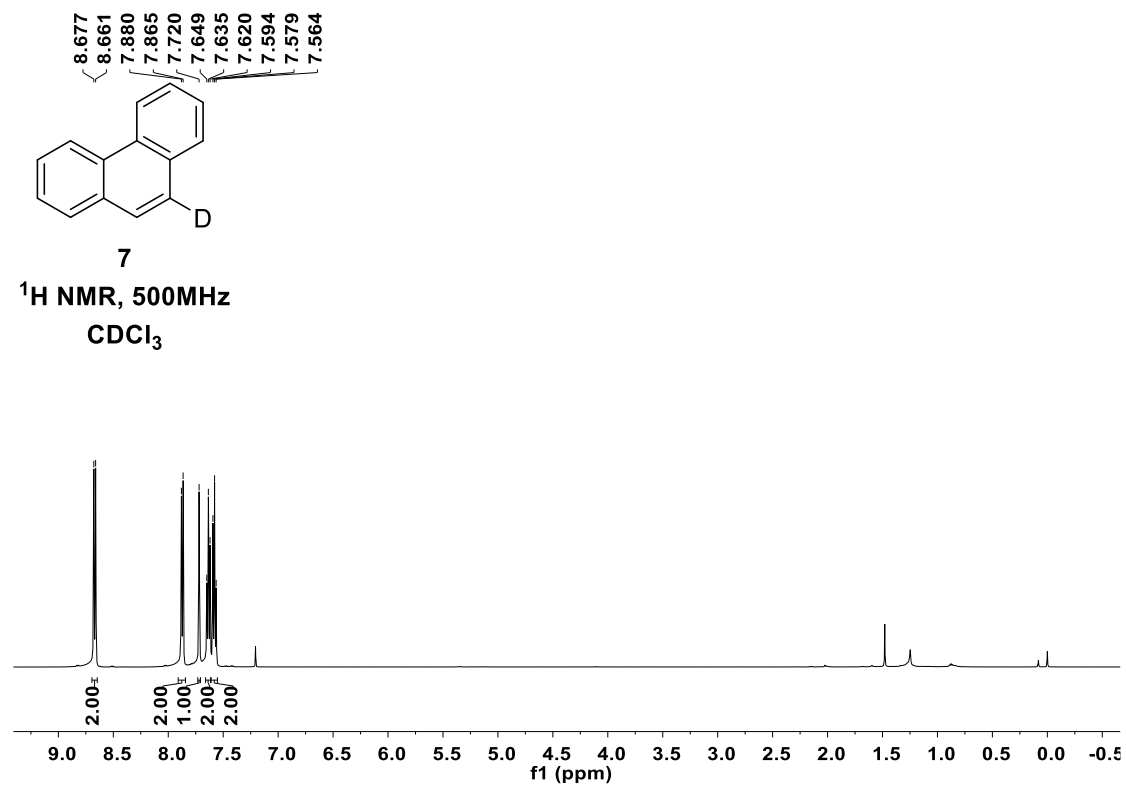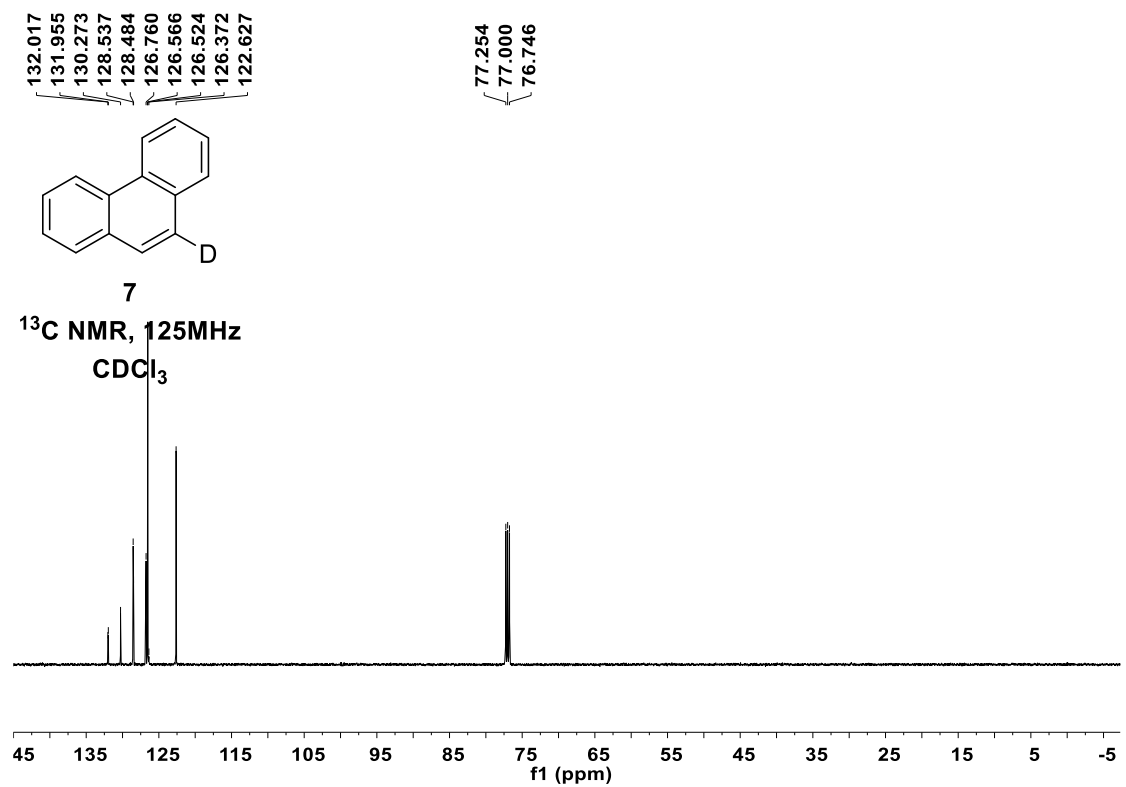

7.682  
7.680  
7.678  
7.661  
7.658  
7.653  
7.650  
7.635  
7.632  
7.628  
7.626  
7.624  
7.364  
7.361  
7.347  
7.344  
7.341  
7.327  
7.324  
7.259  
7.256  
7.242  
7.239  
7.236  
7.221  
7.218  
7.067  
7.045  
3.808

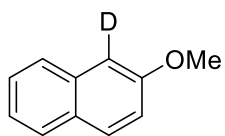

8

<sup>1</sup>H NMR, 500MHz

CDCl<sub>3</sub>

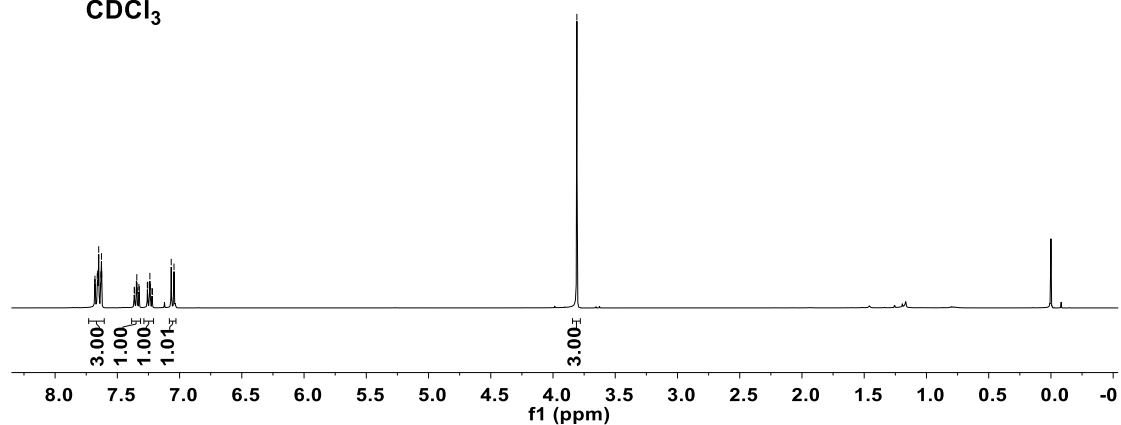

157.456  
134.428  
129.327  
128.860  
127.611  
126.630  
126.319  
123.533  
118.687  
105.555  
105.317  
105.077  
77.318  
77.000  
76.682  
55.222

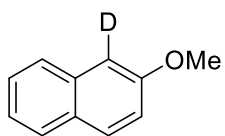

8

<sup>13</sup>C NMR, 125MHz

CDCl<sub>3</sub>

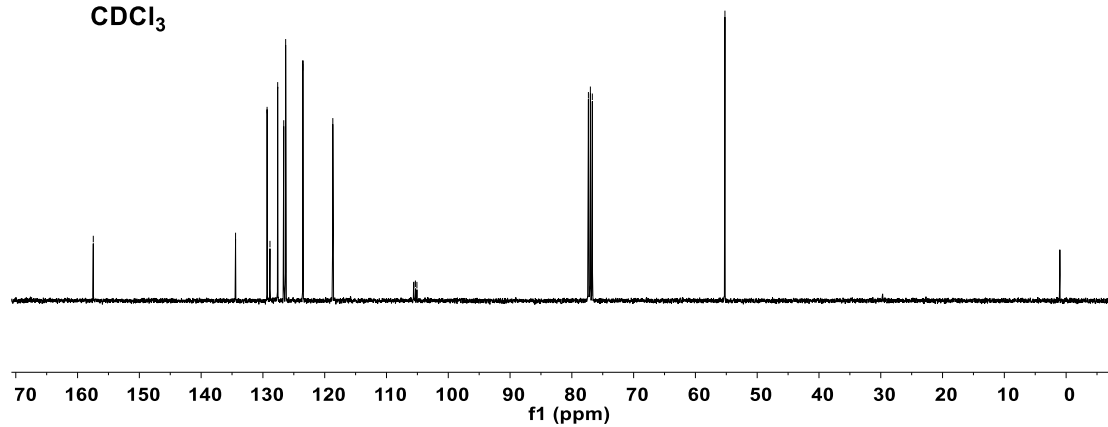

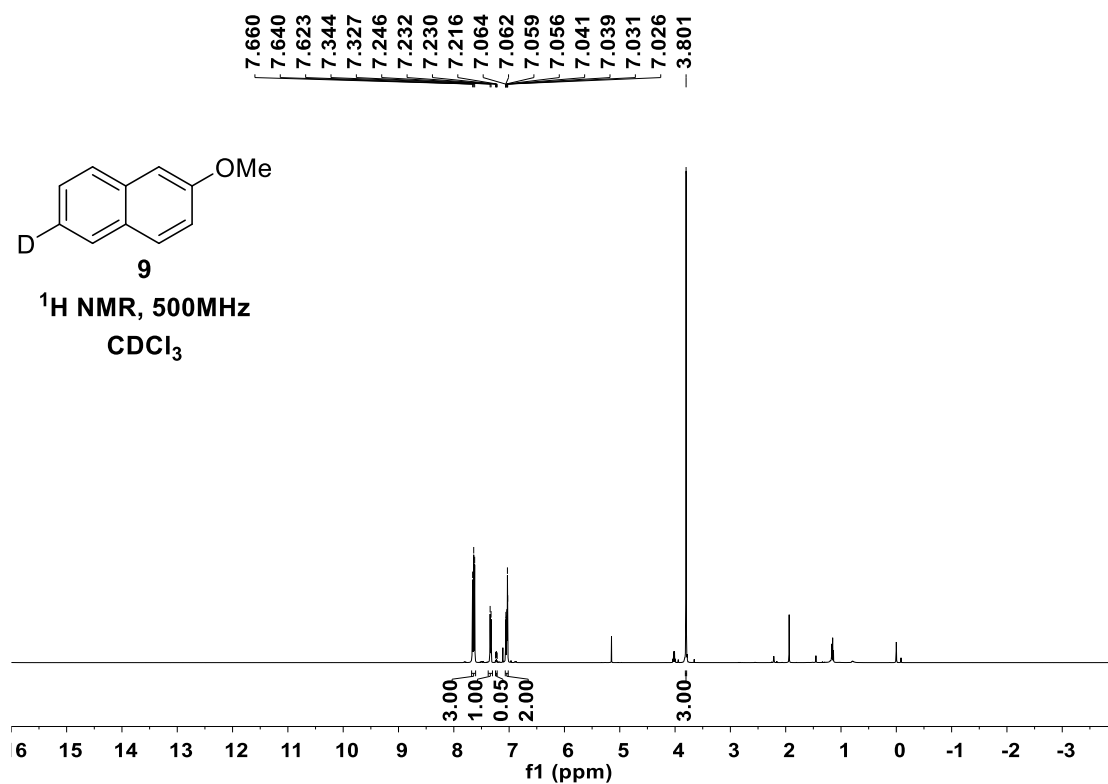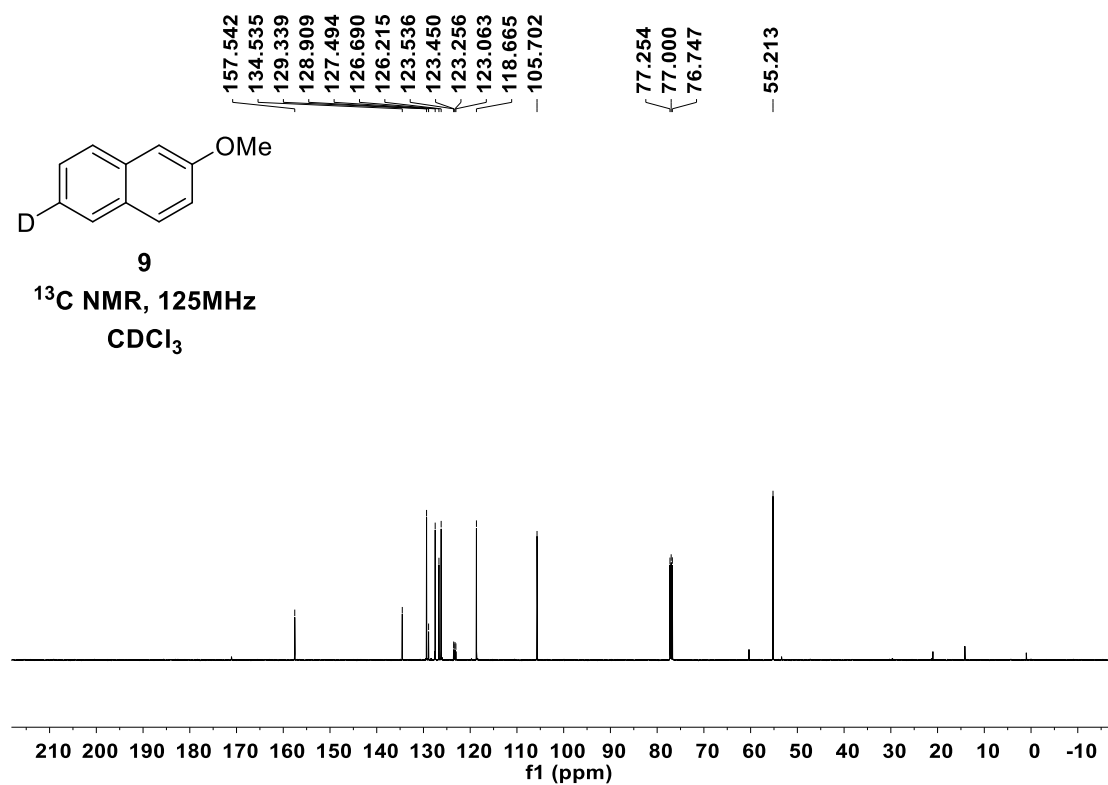

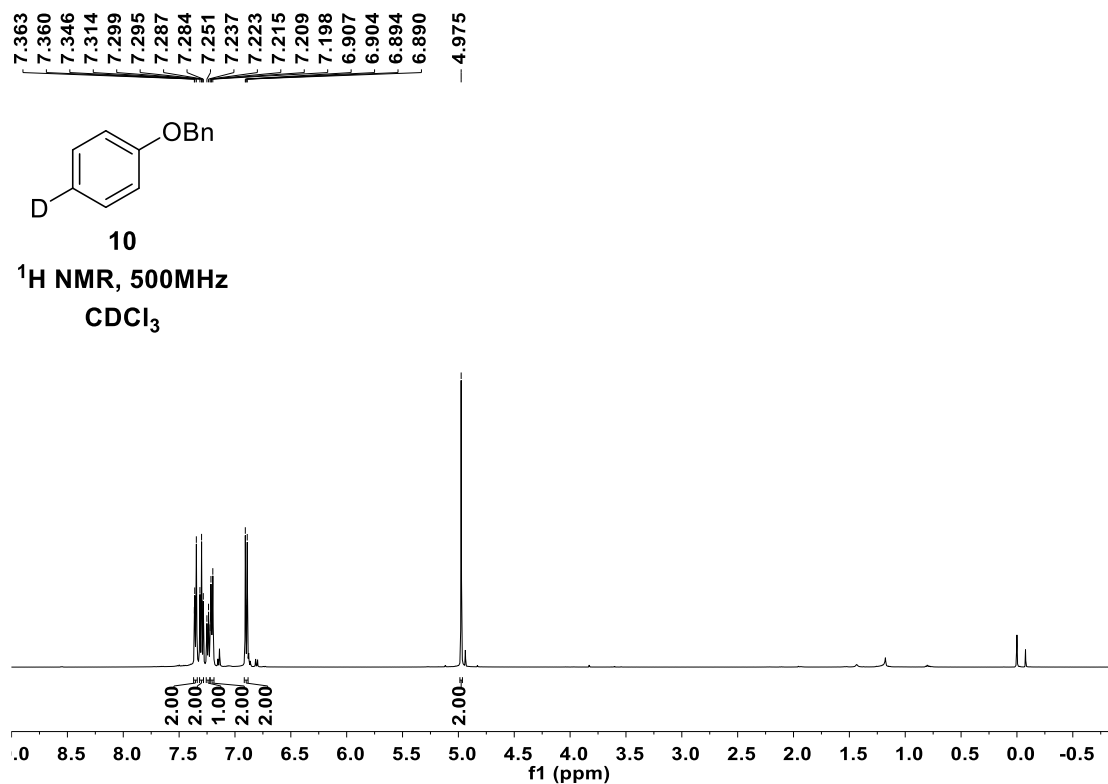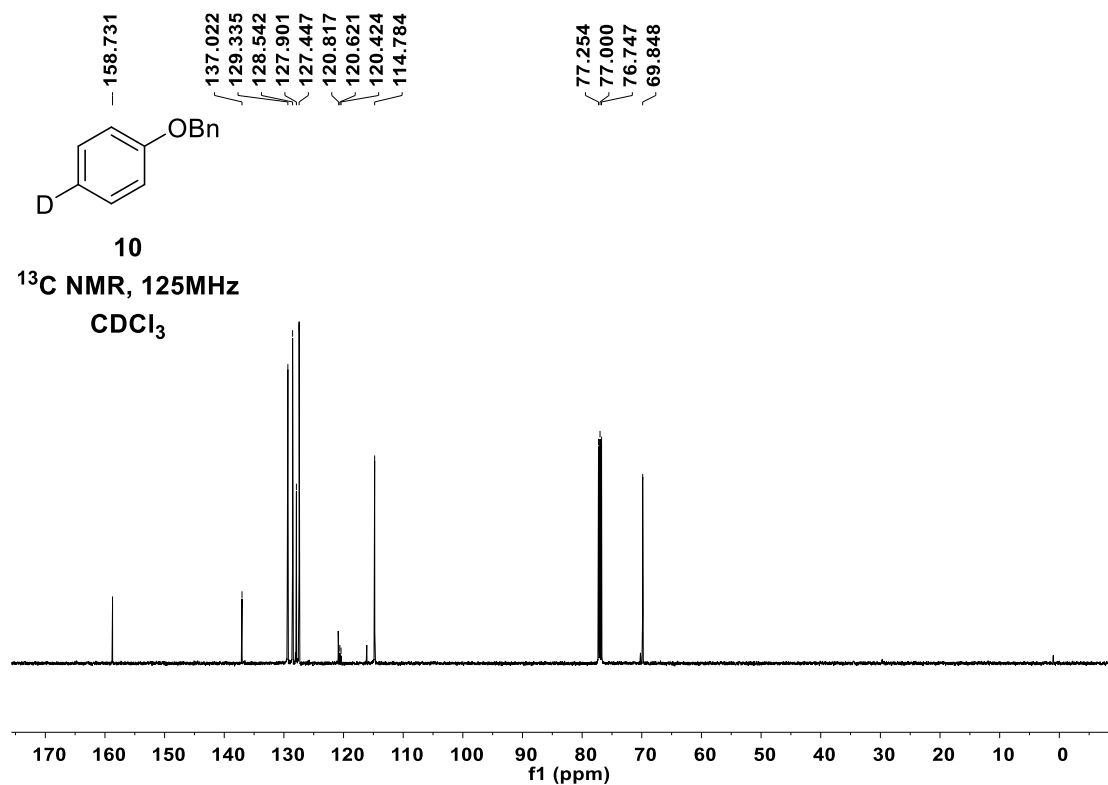

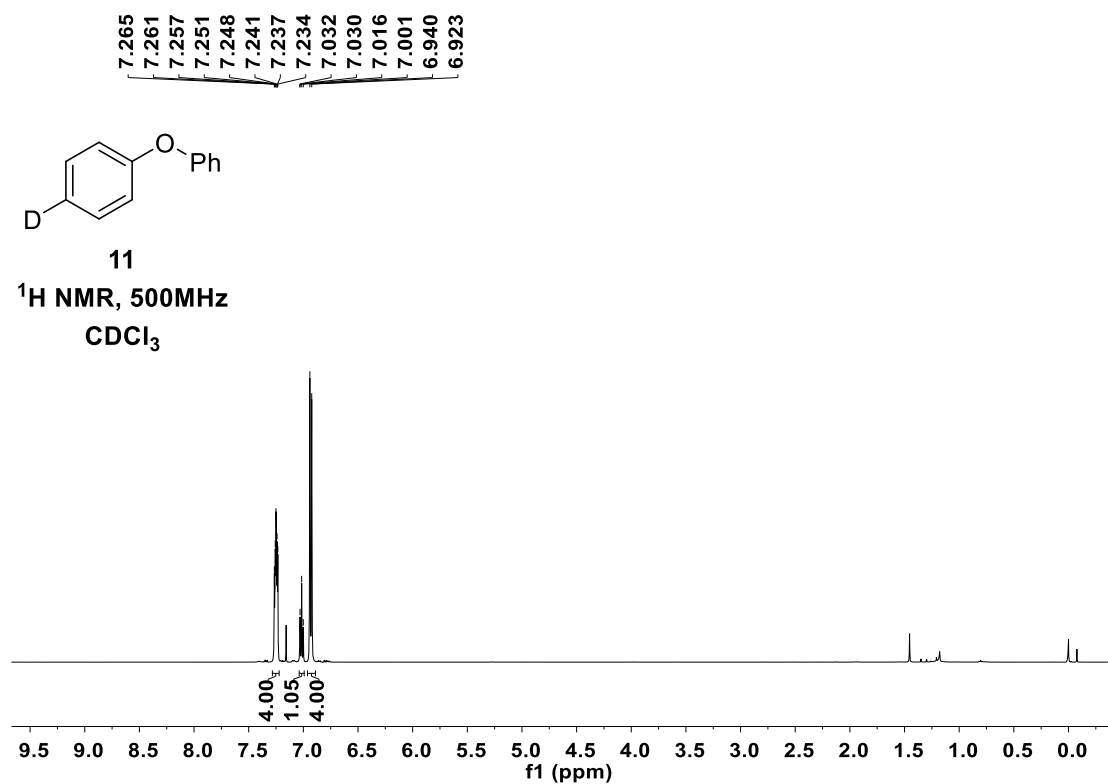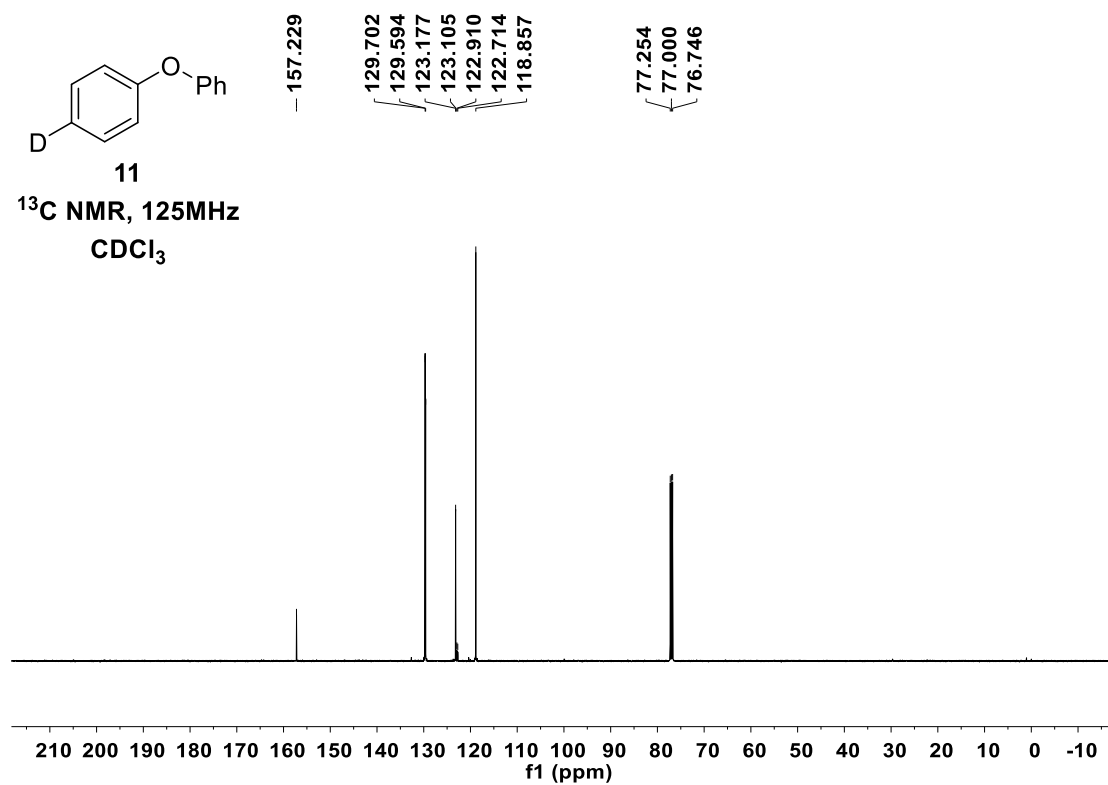

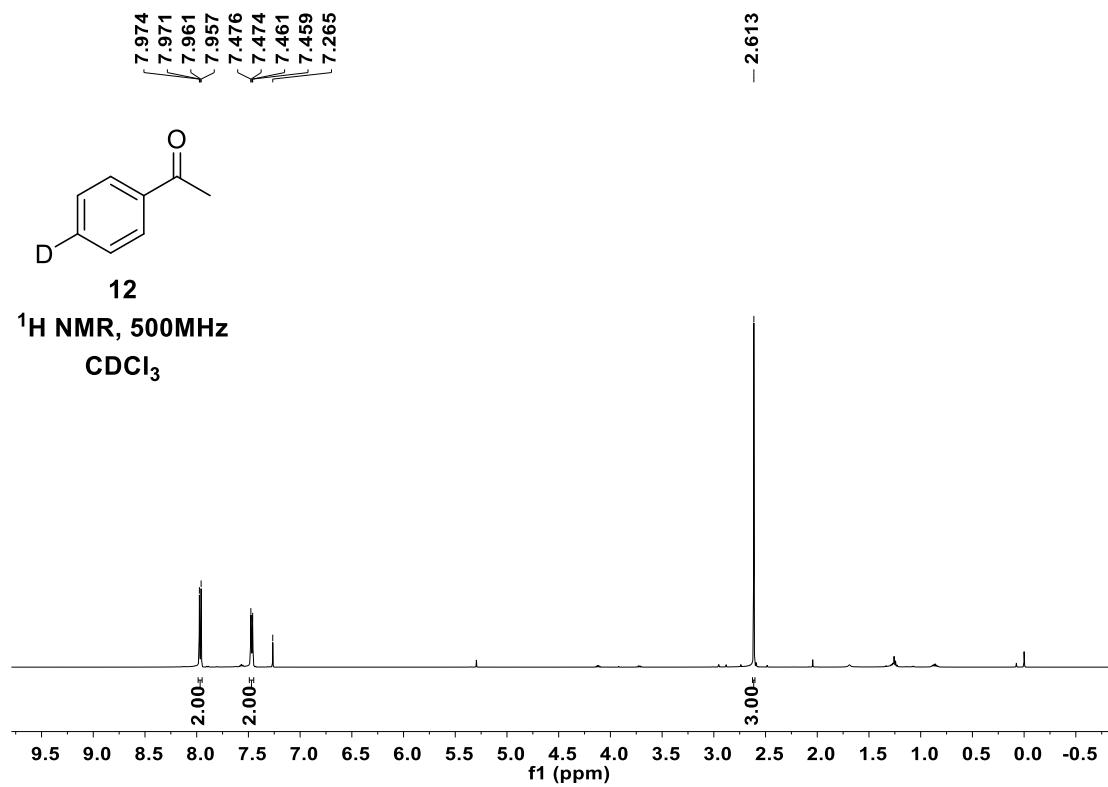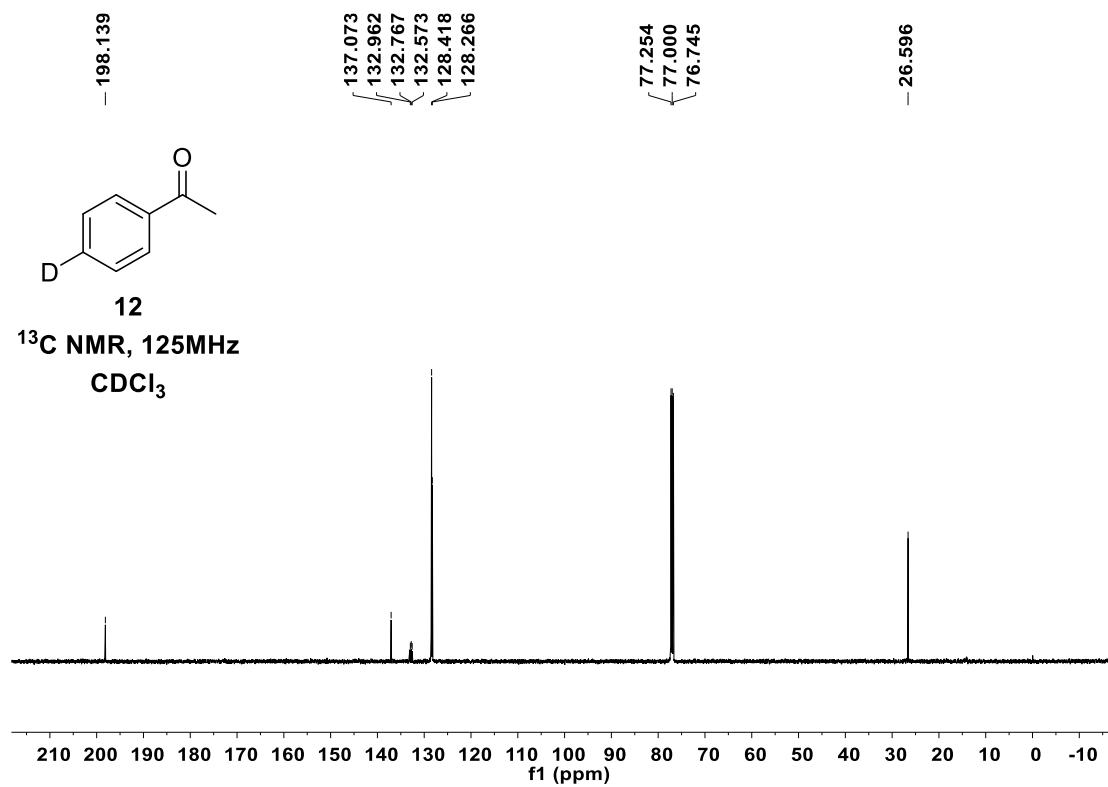

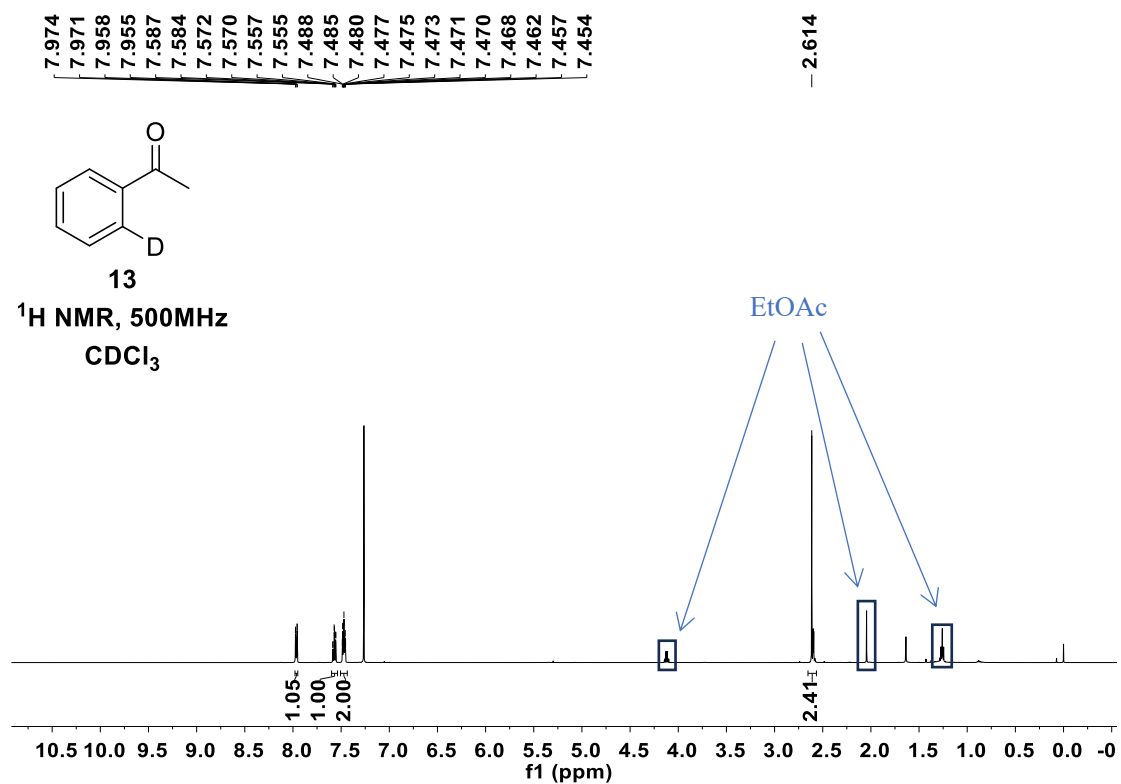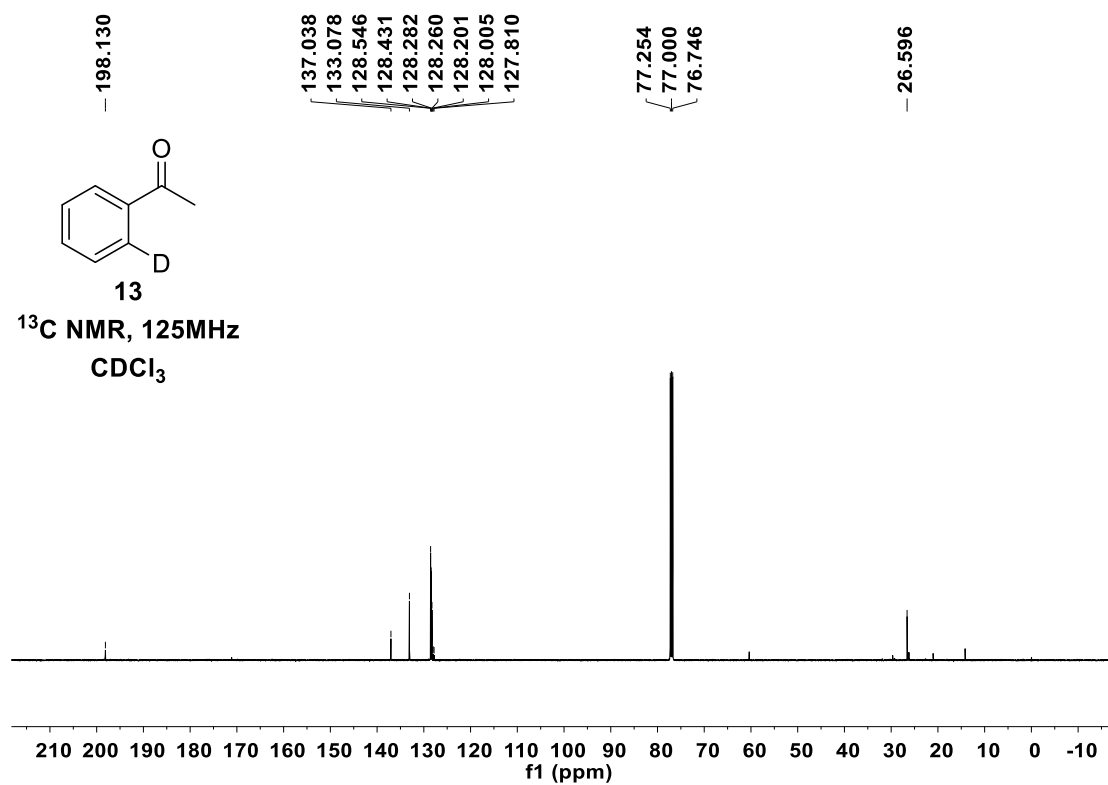

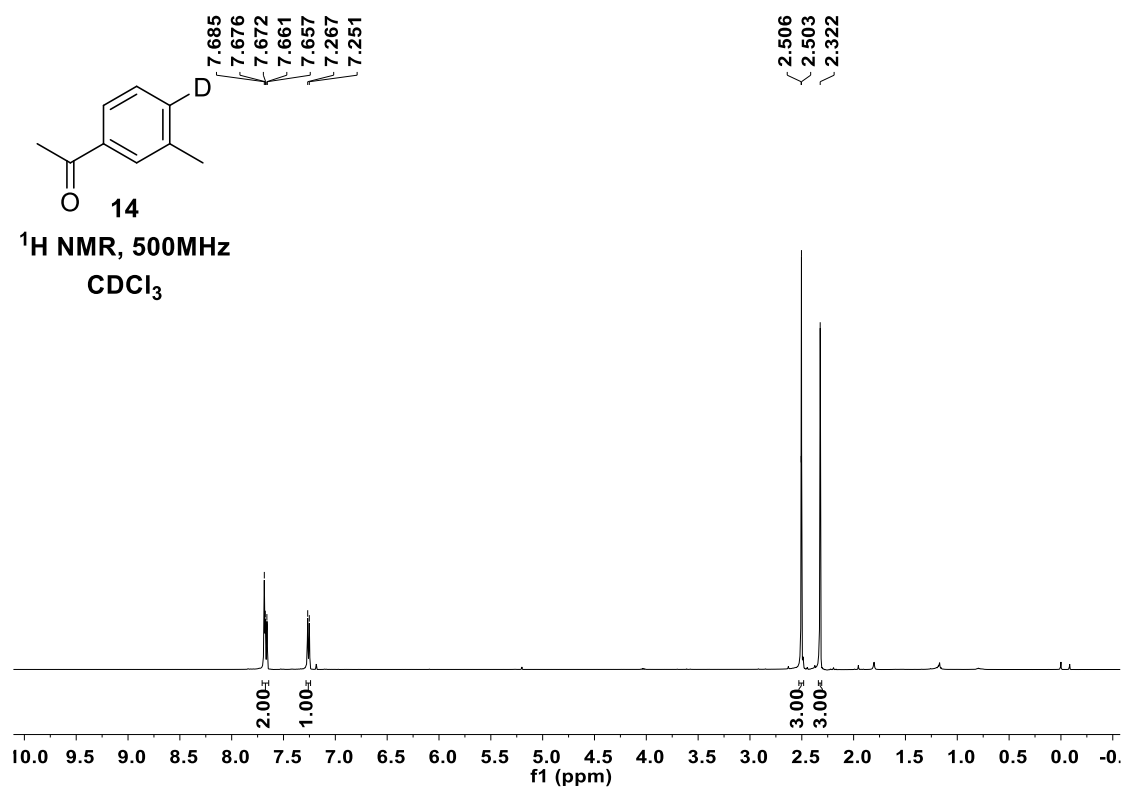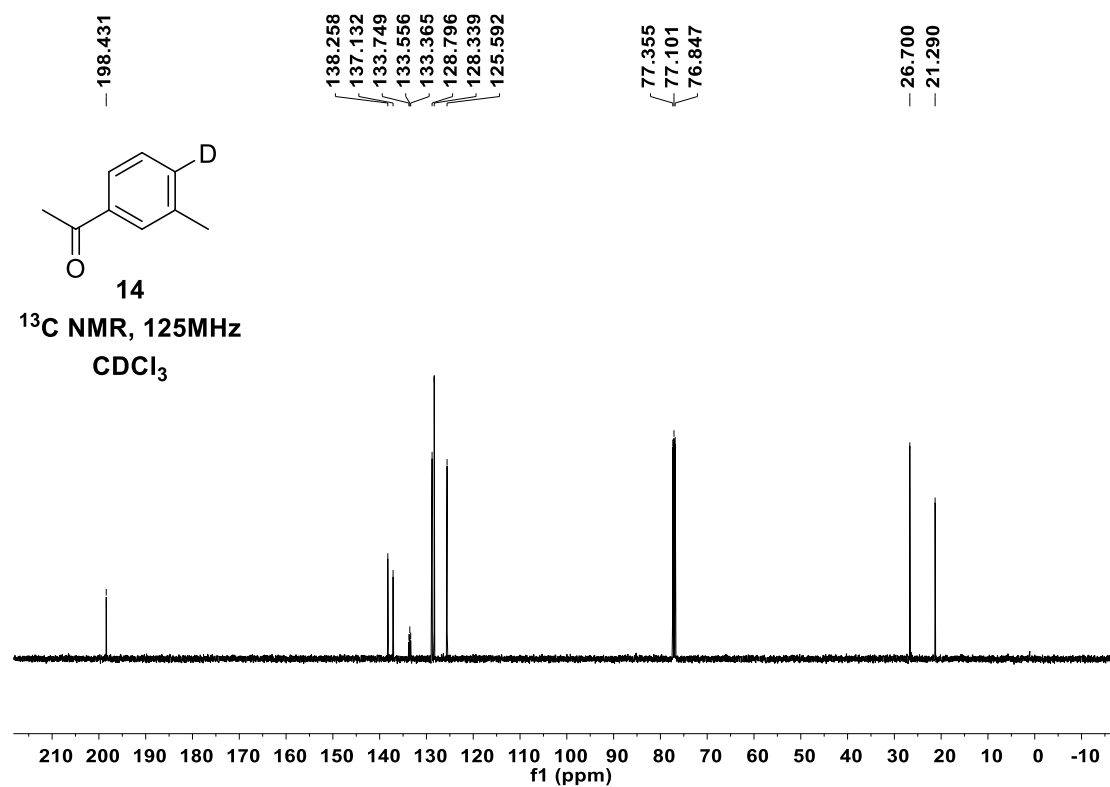

7.746  
7.743  
7.740  
7.737  
7.730  
7.726  
7.723  
7.532  
7.524  
7.521  
7.517  
7.513  
7.509  
7.505  
7.502  
7.499  
7.427  
7.423  
7.411  
7.399  
7.395

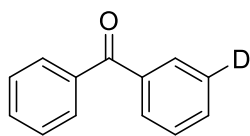

15

$^1\text{H}$  NMR, 500MHz  
 $\text{CDCl}_3$

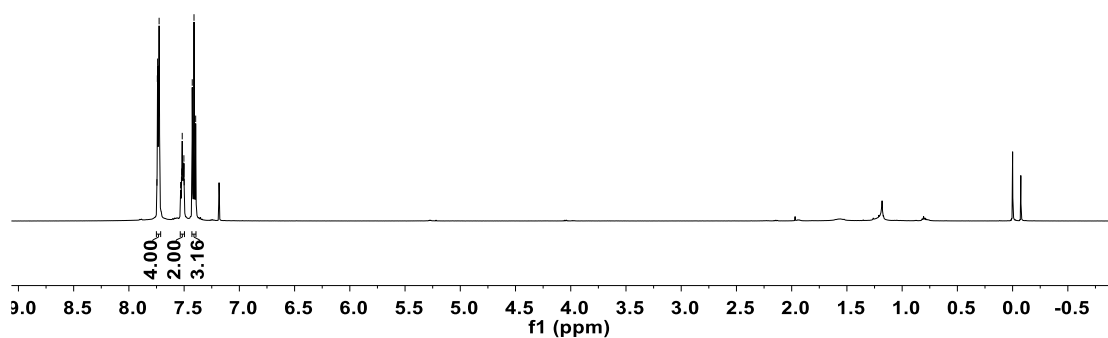

196.731

137.569  
132.386  
132.279  
130.033  
129.927  
128.246  
128.159  
127.961  
127.762

77.254  
77.000  
76.746

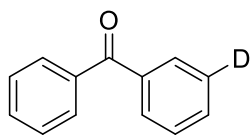

15

$^{13}\text{C}$  NMR, 125MHz  
 $\text{CDCl}_3$

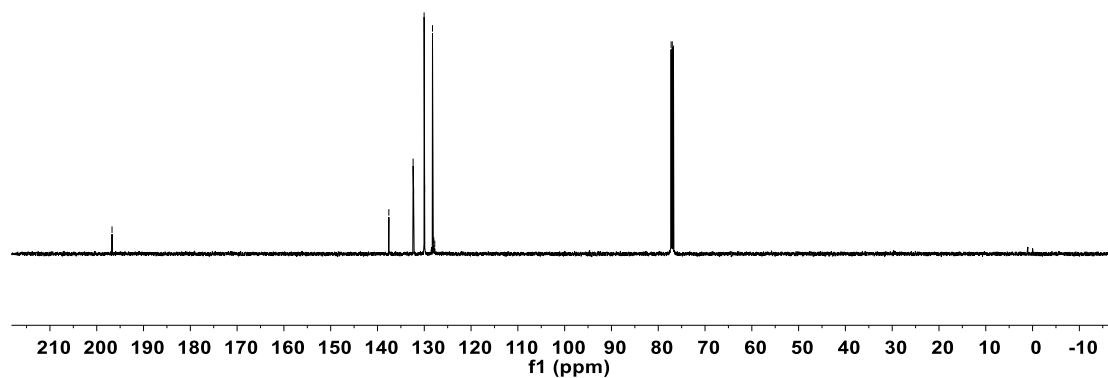

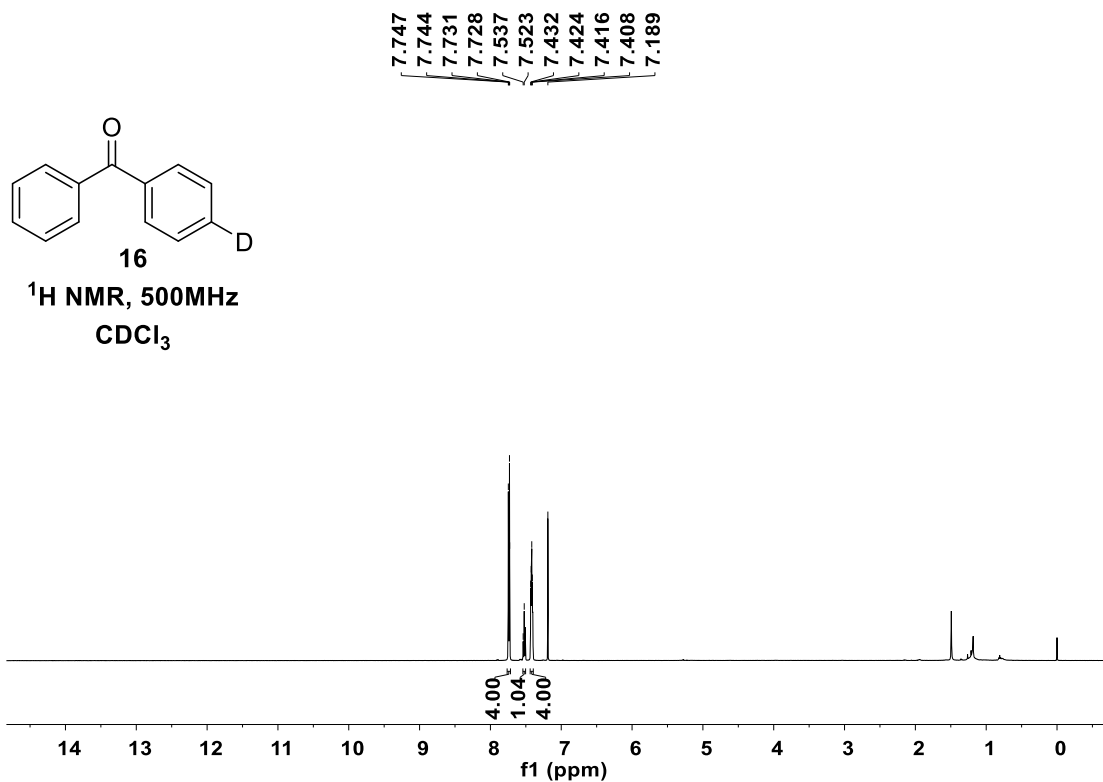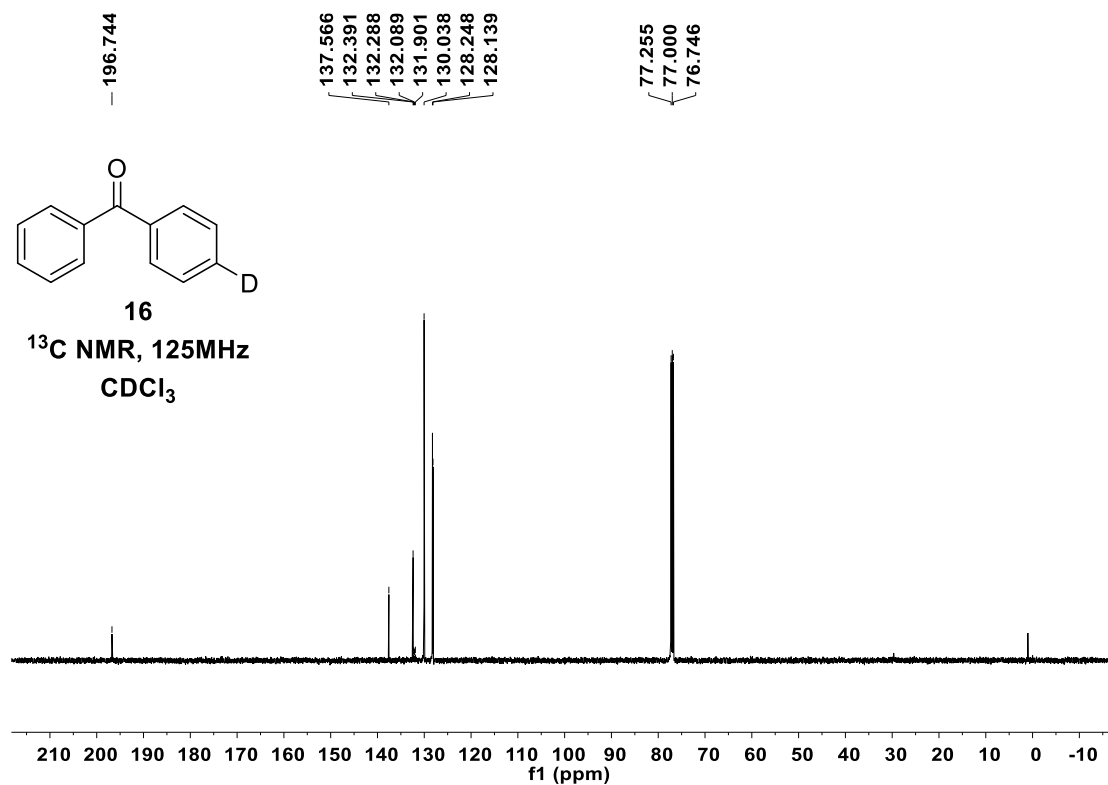

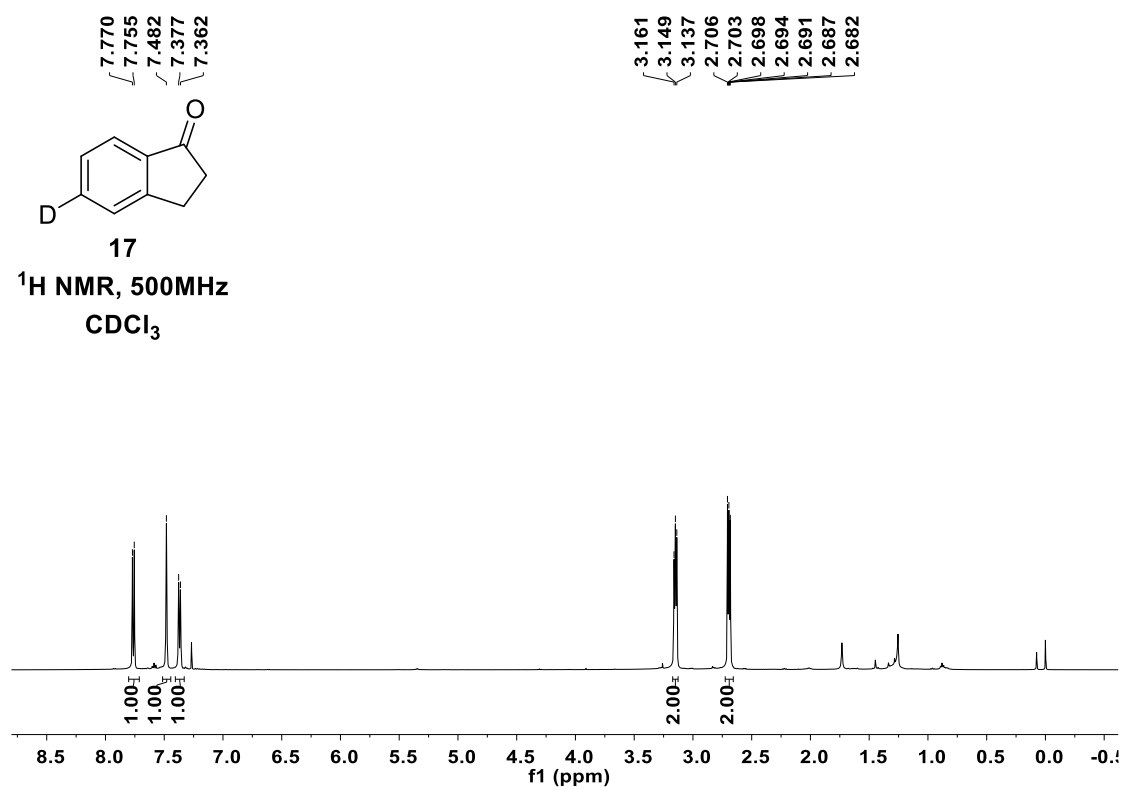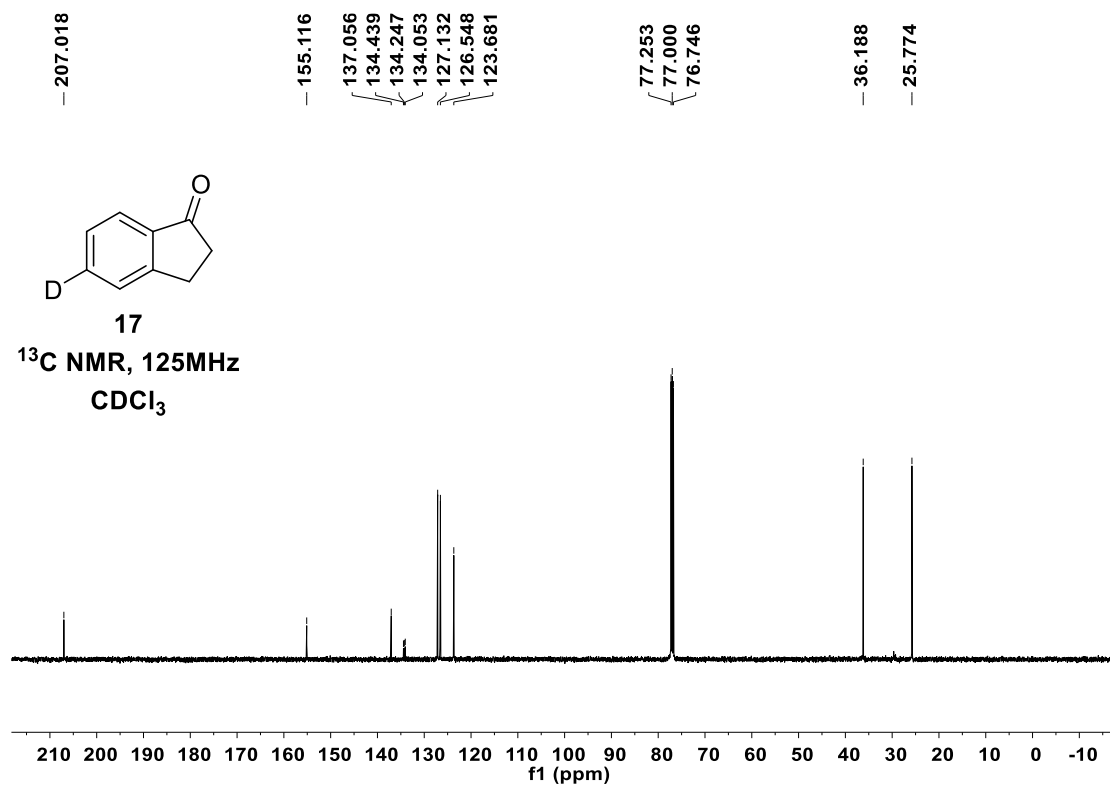

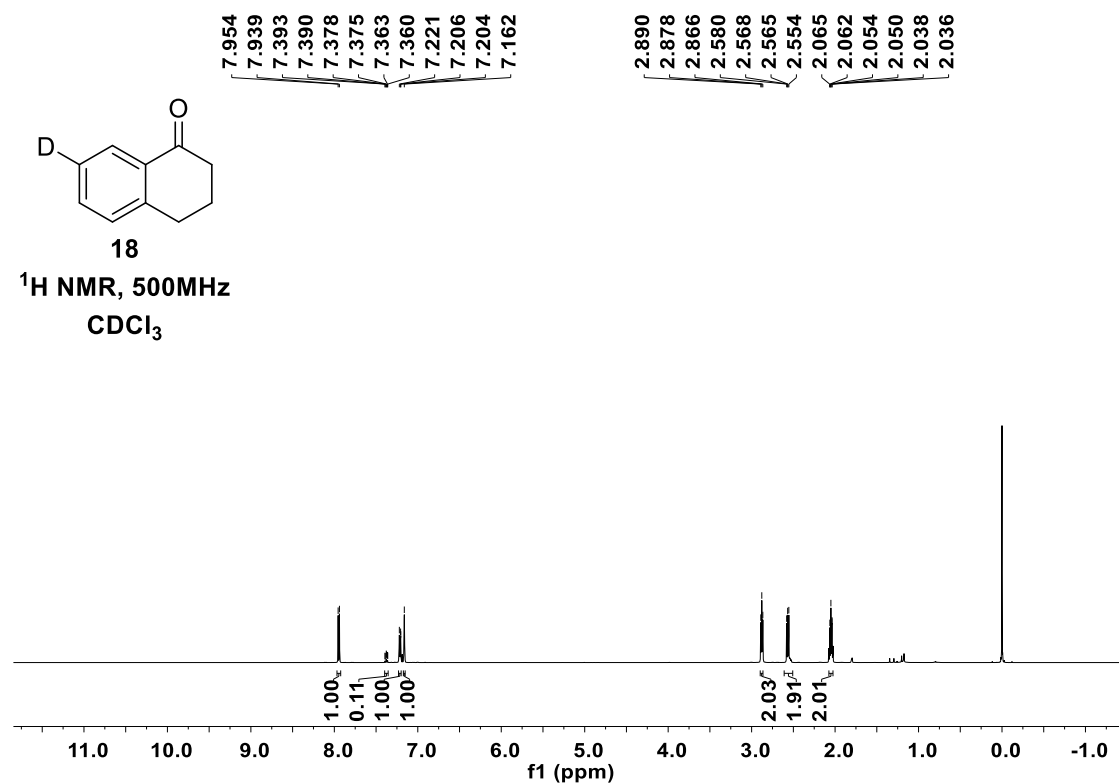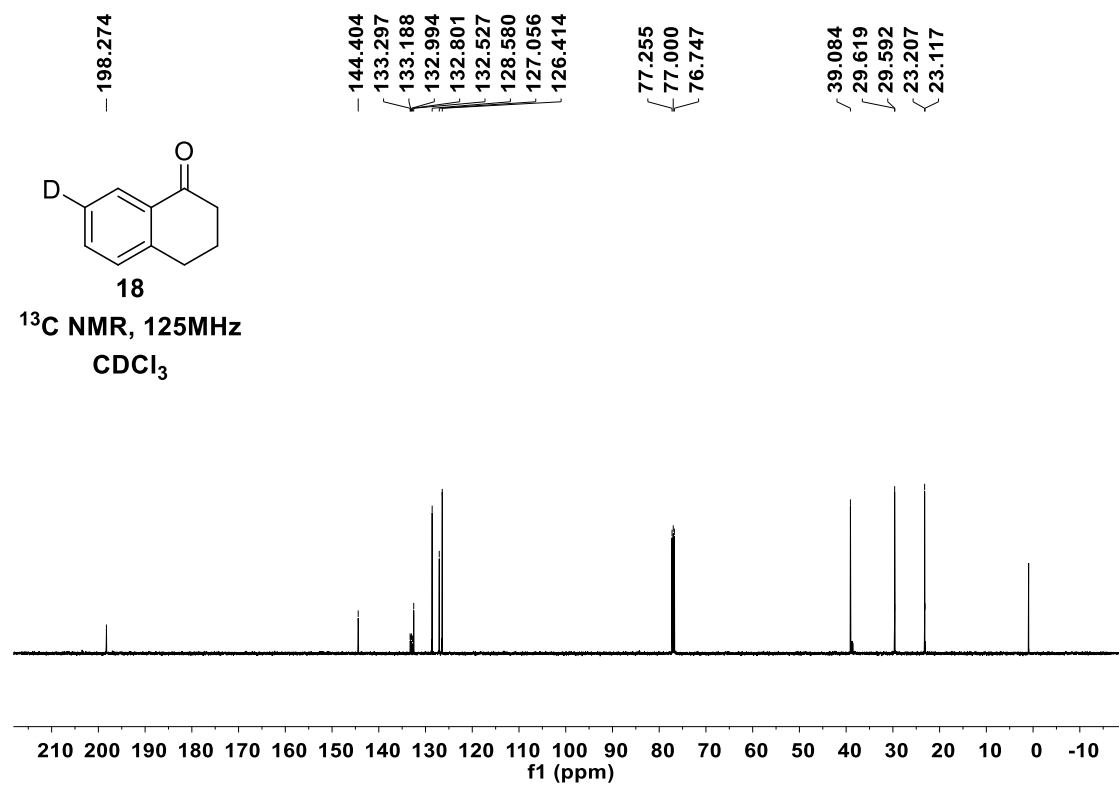

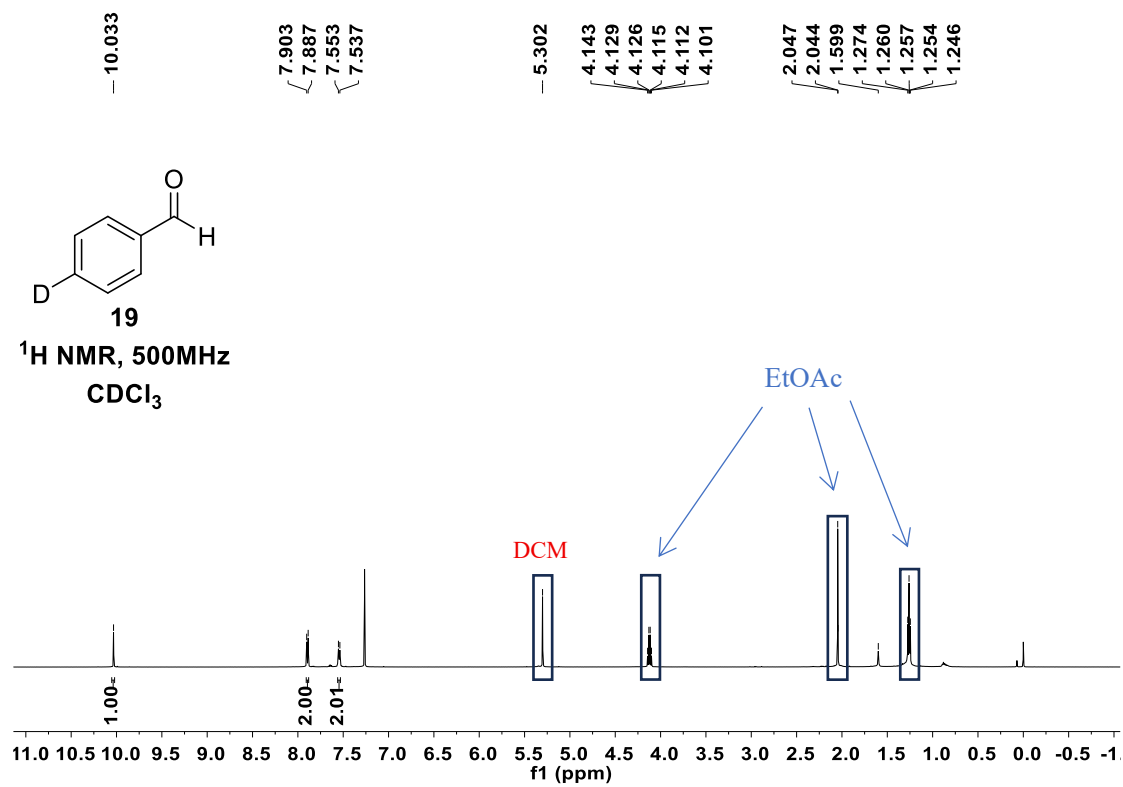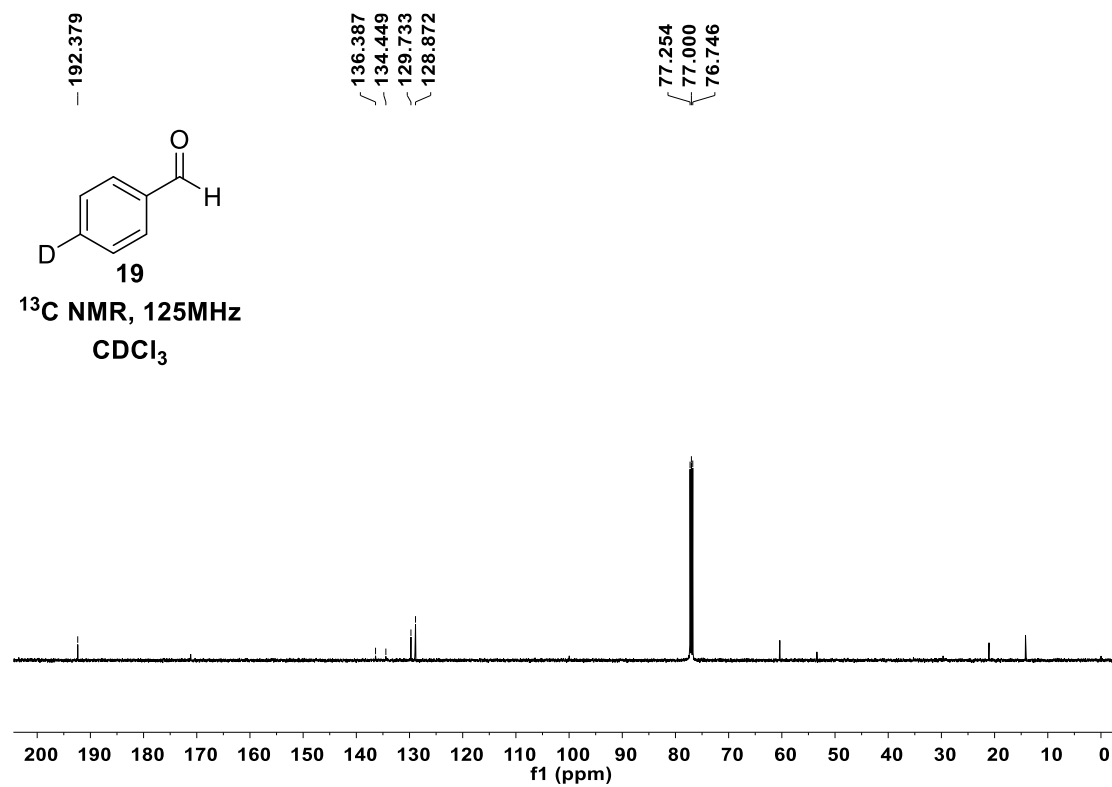

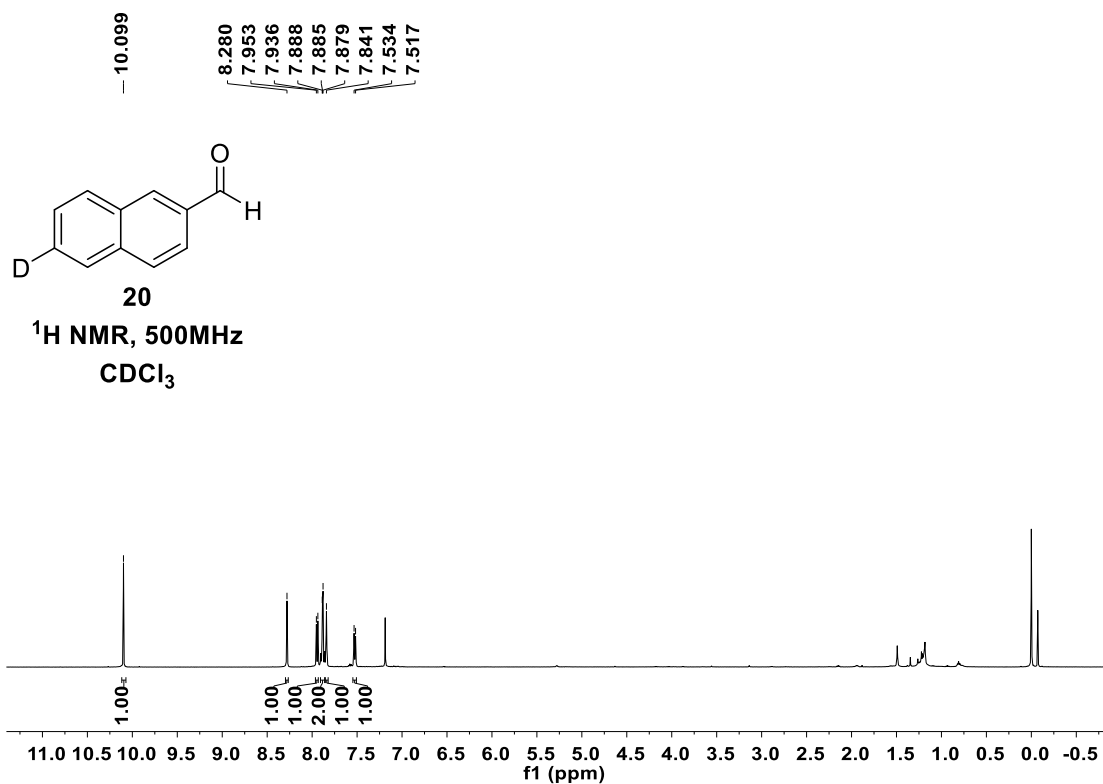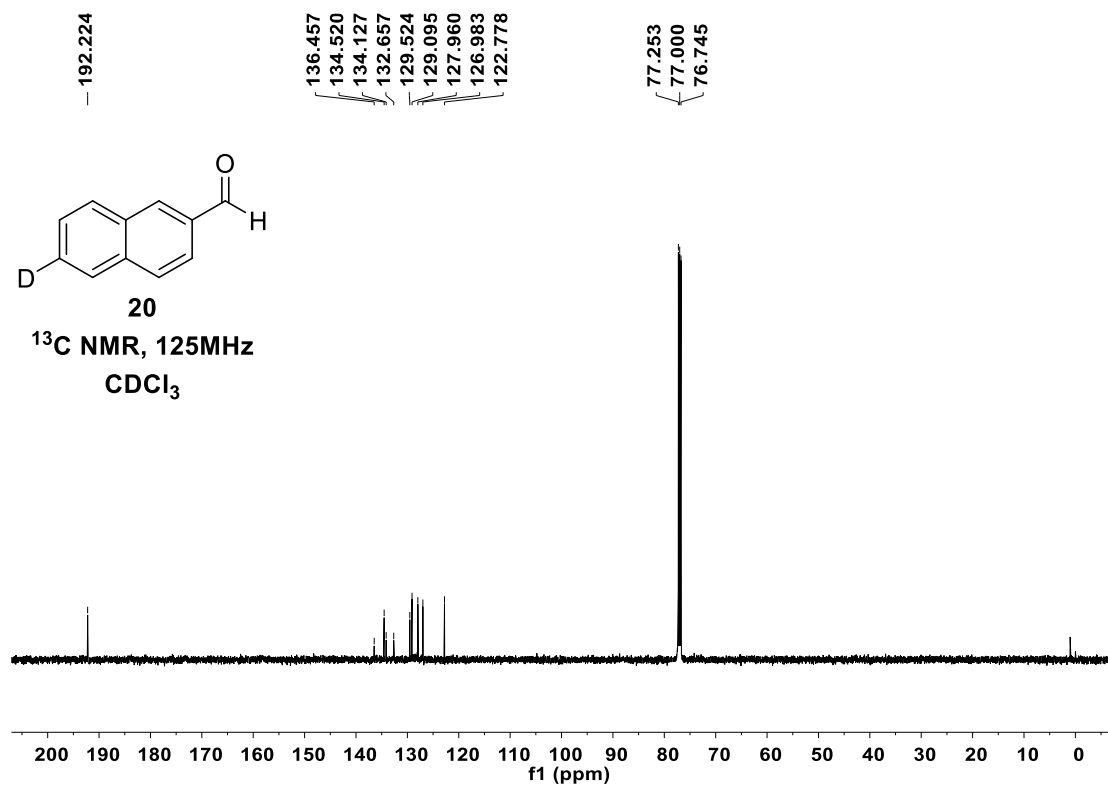

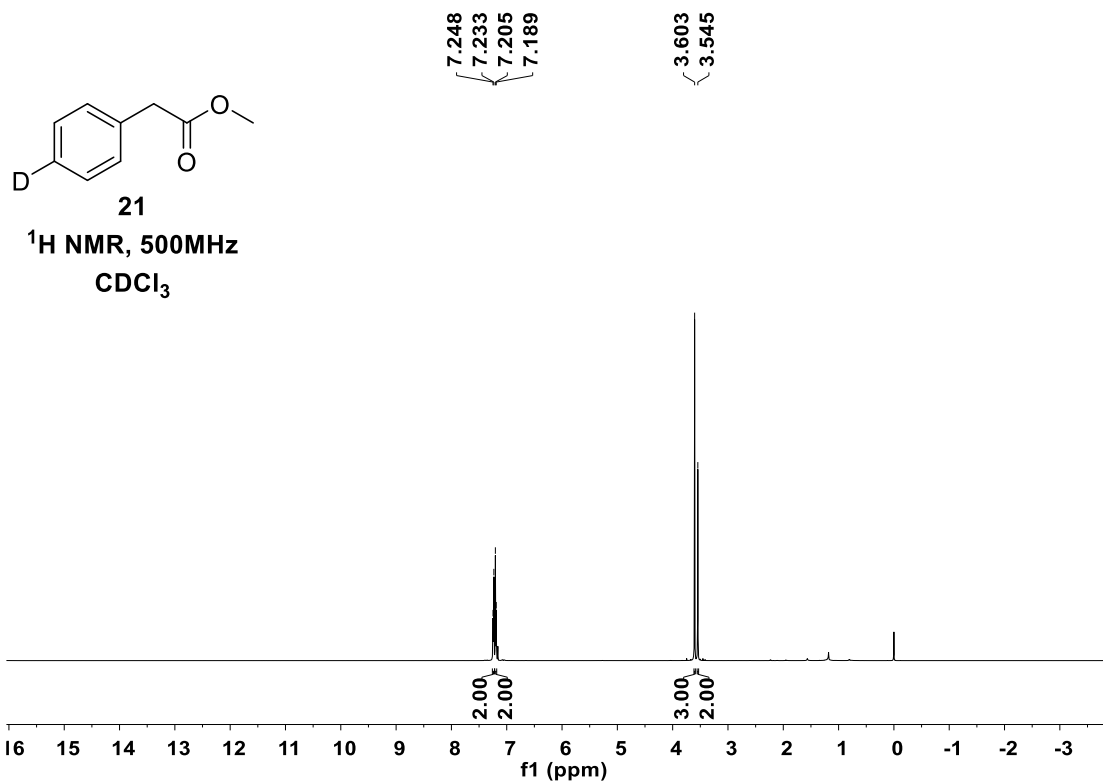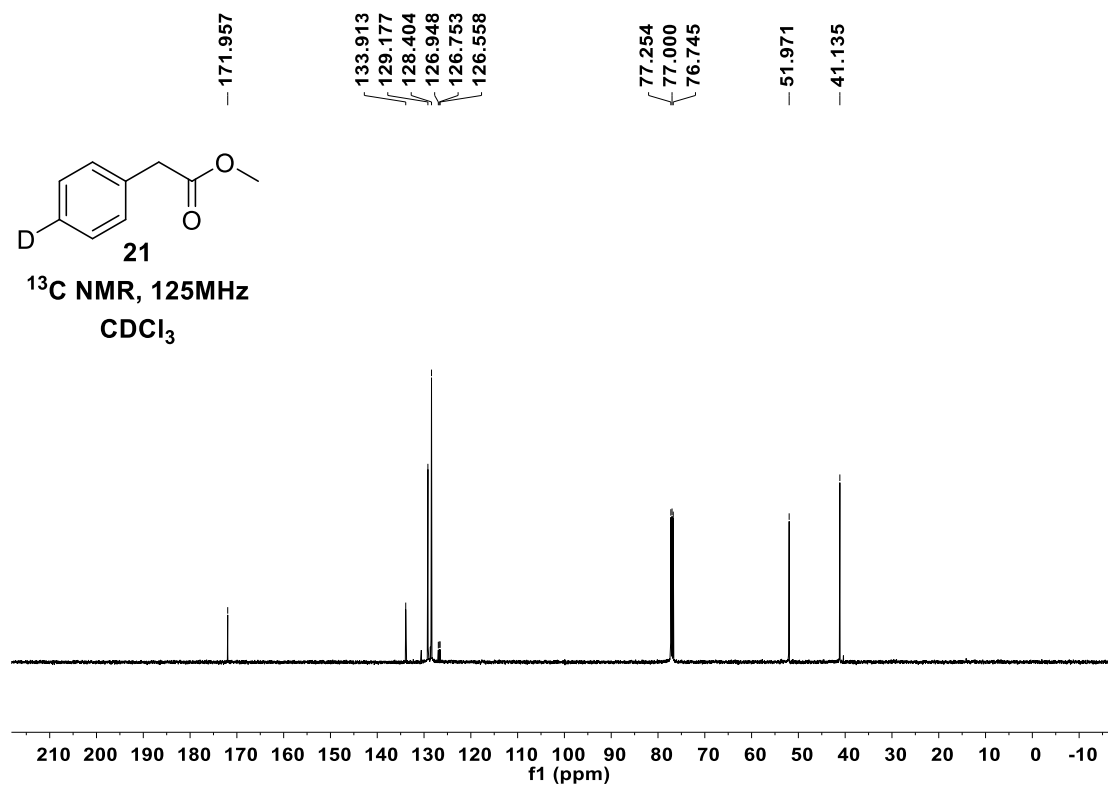

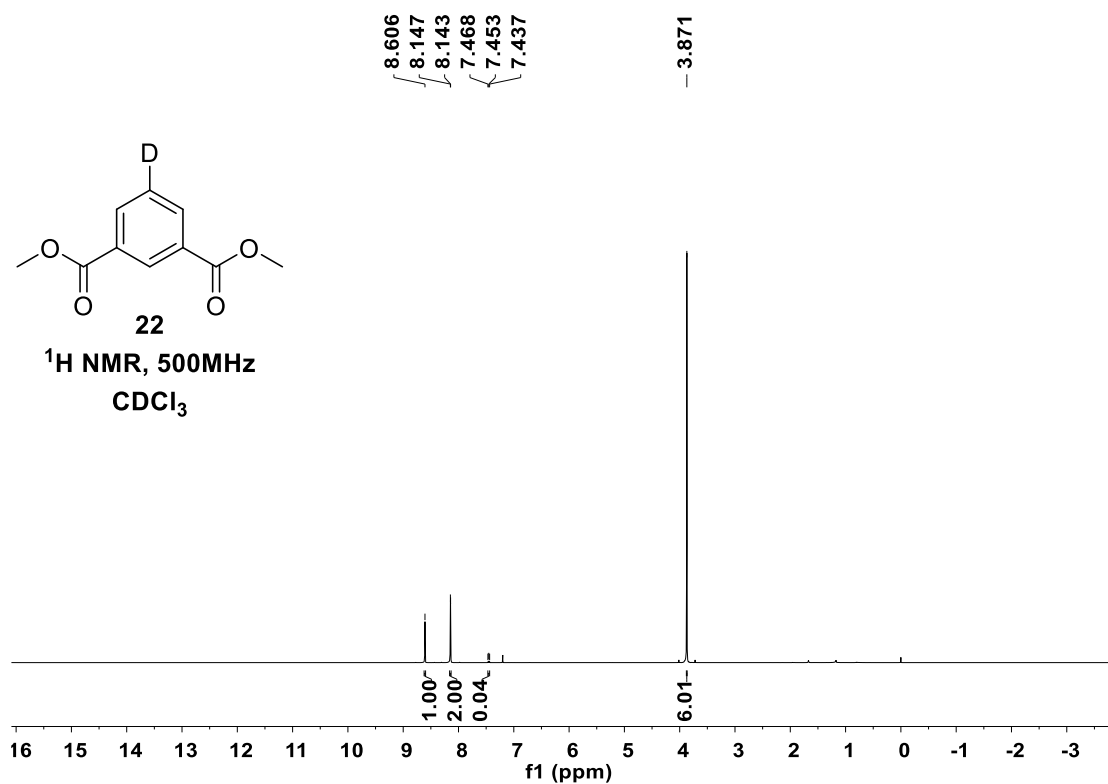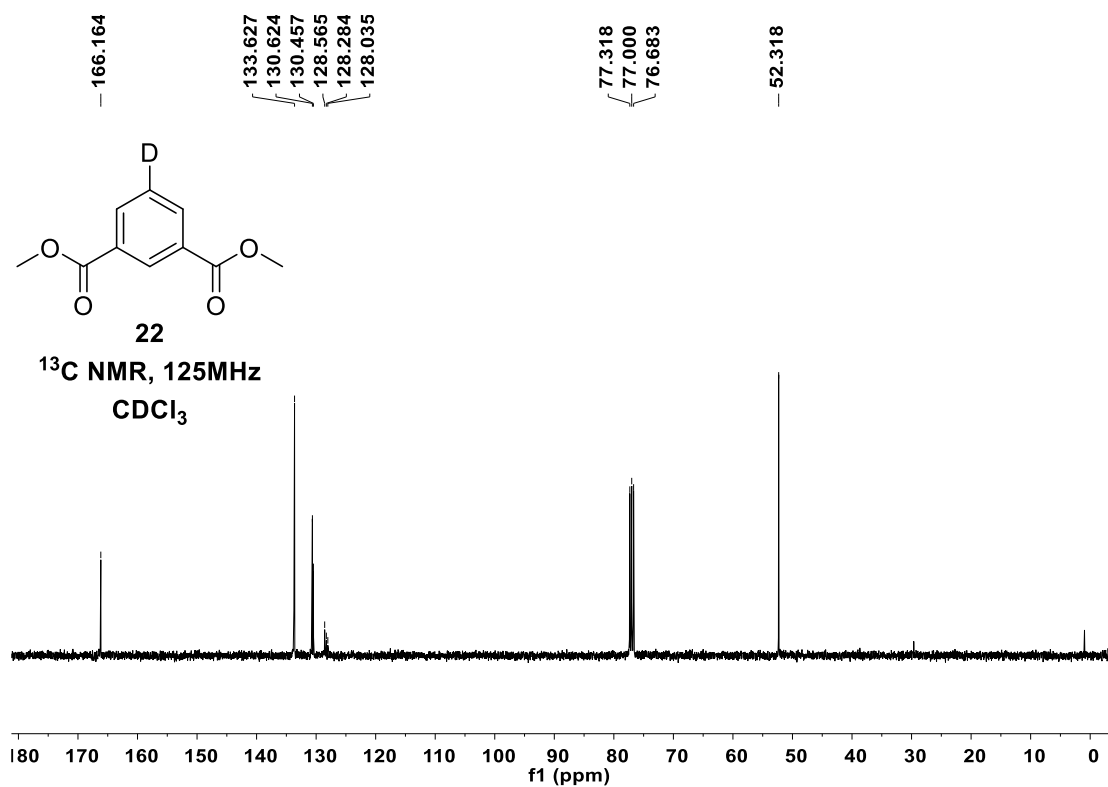

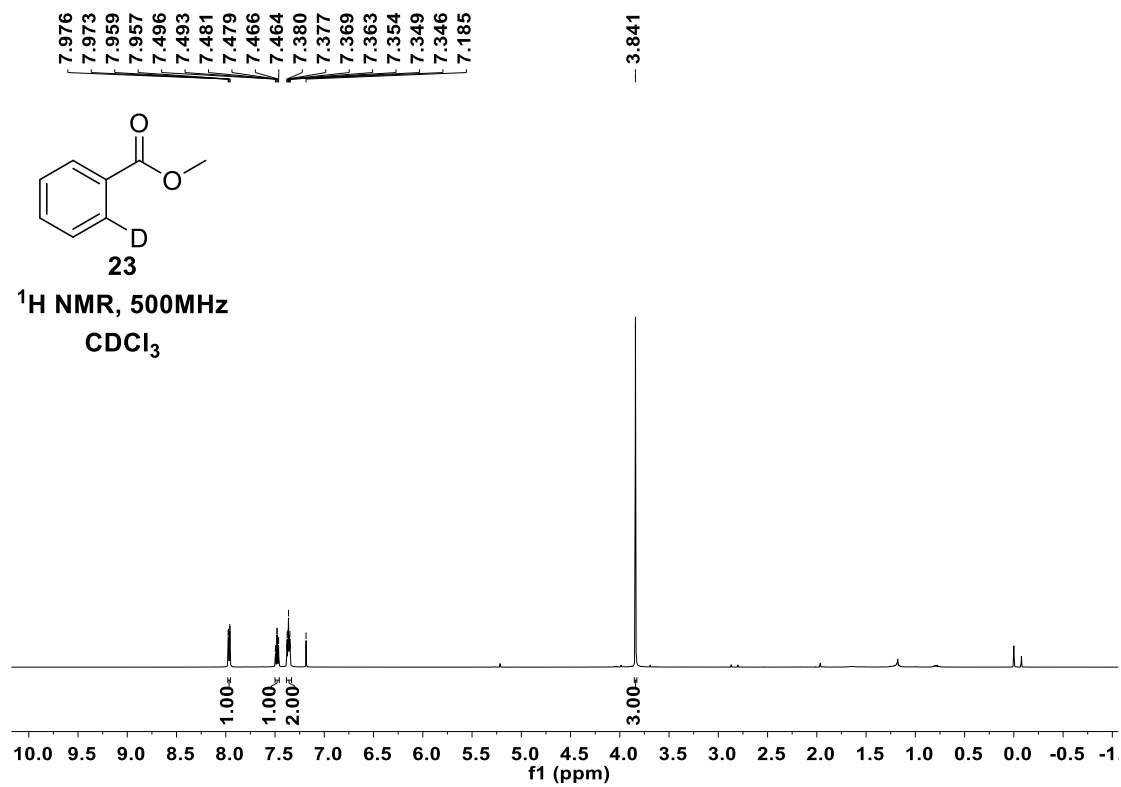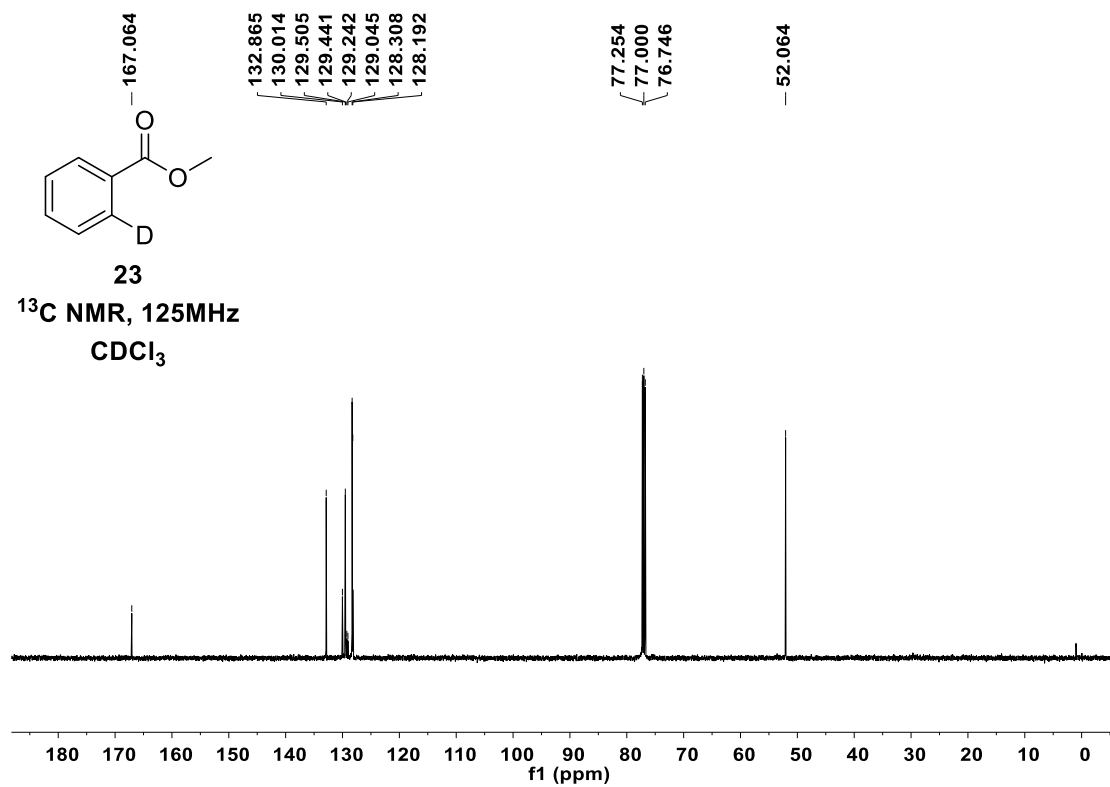

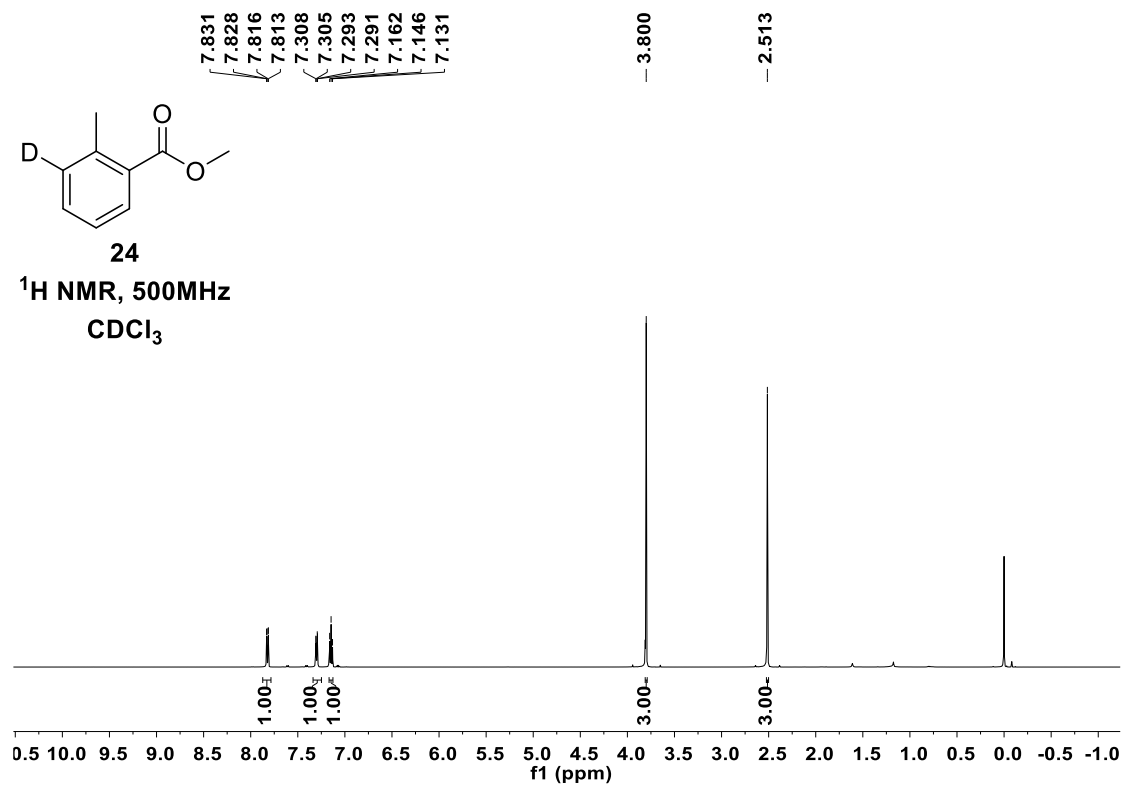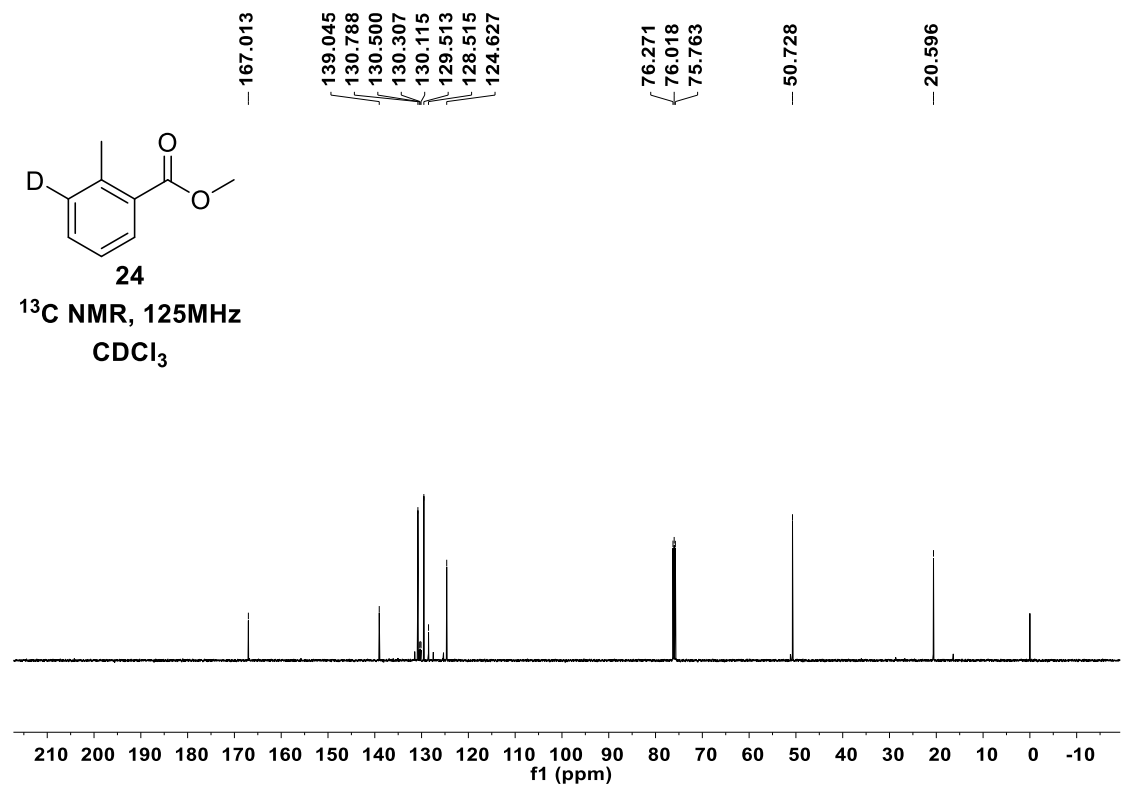

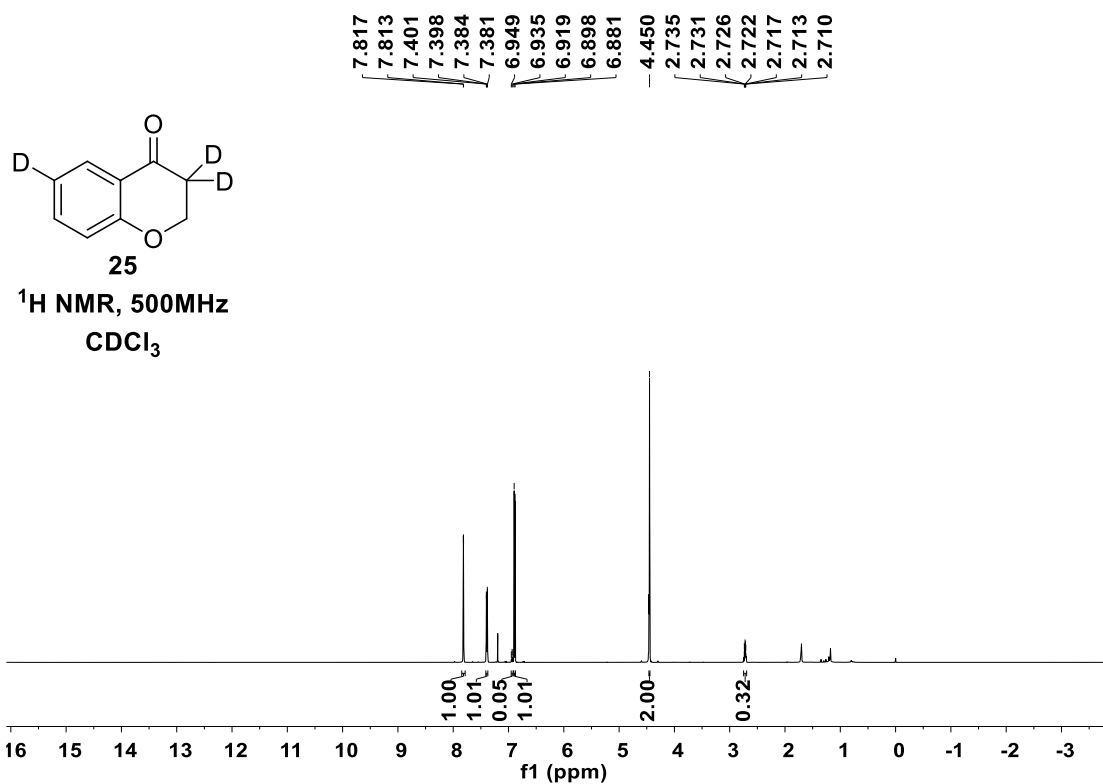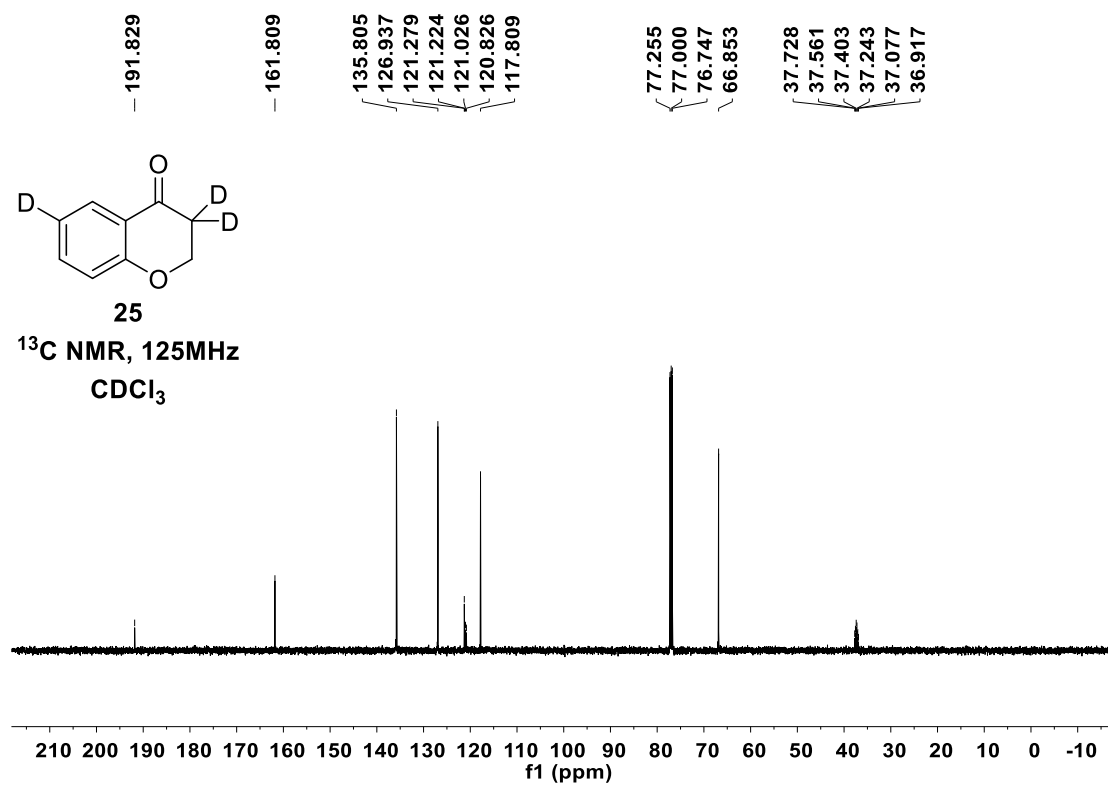

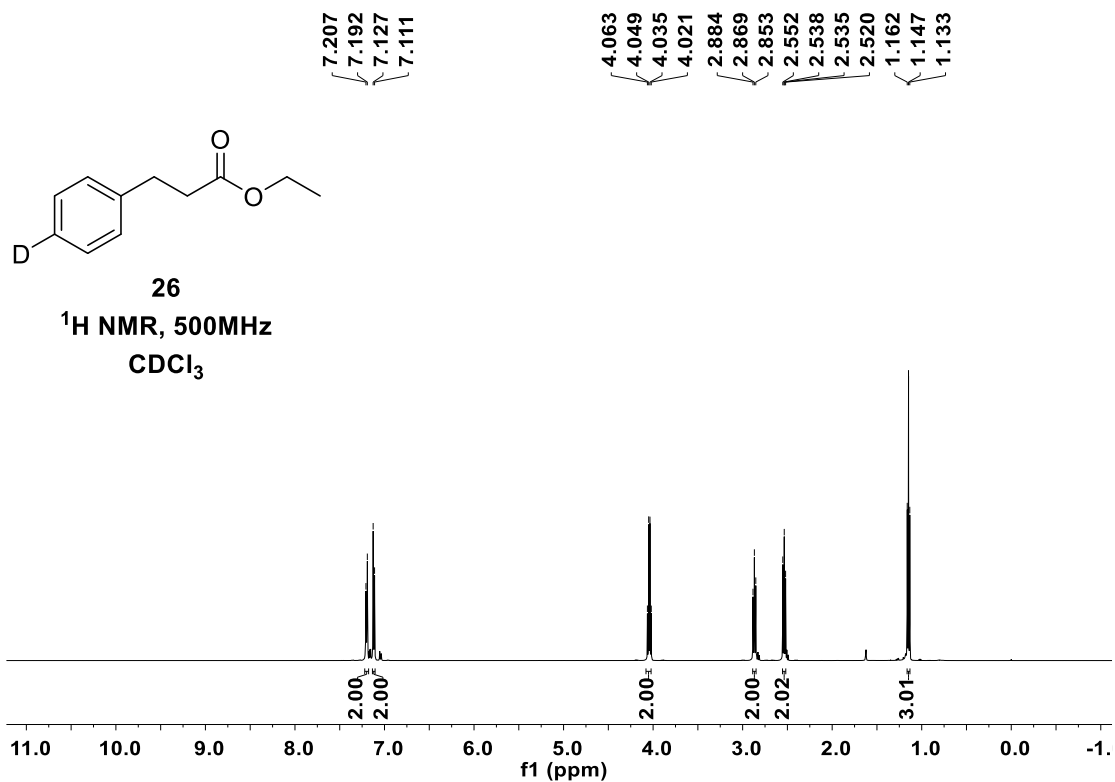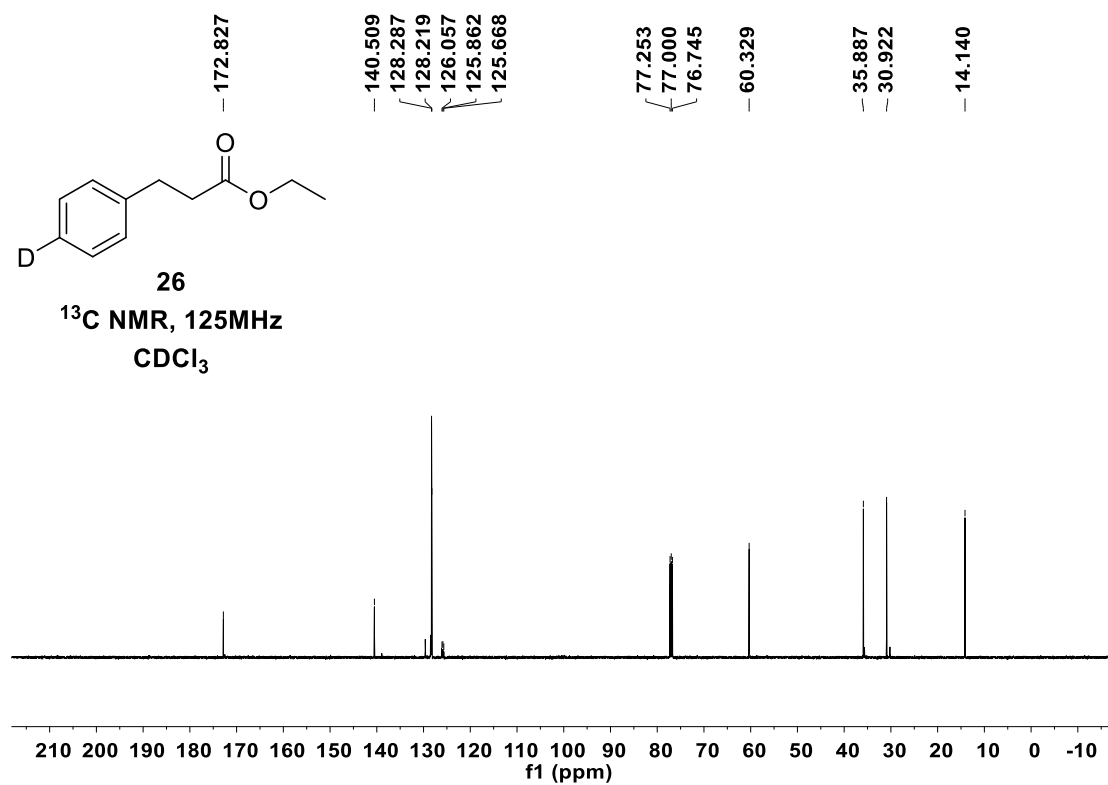

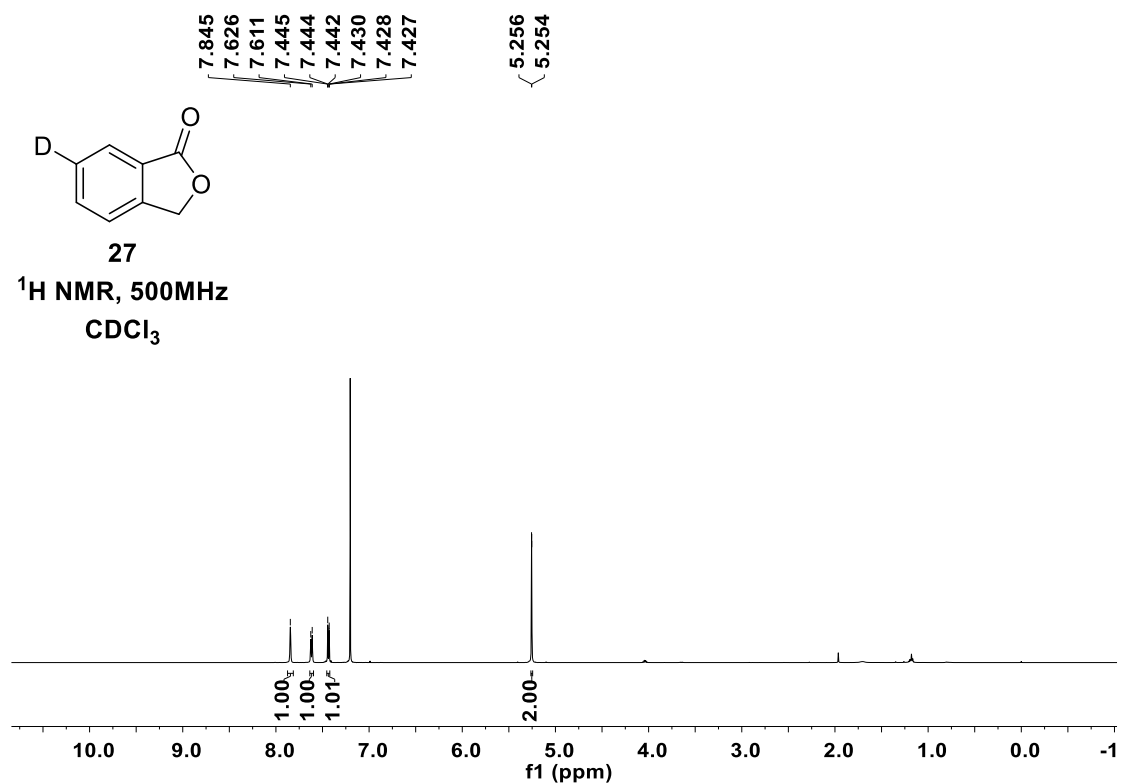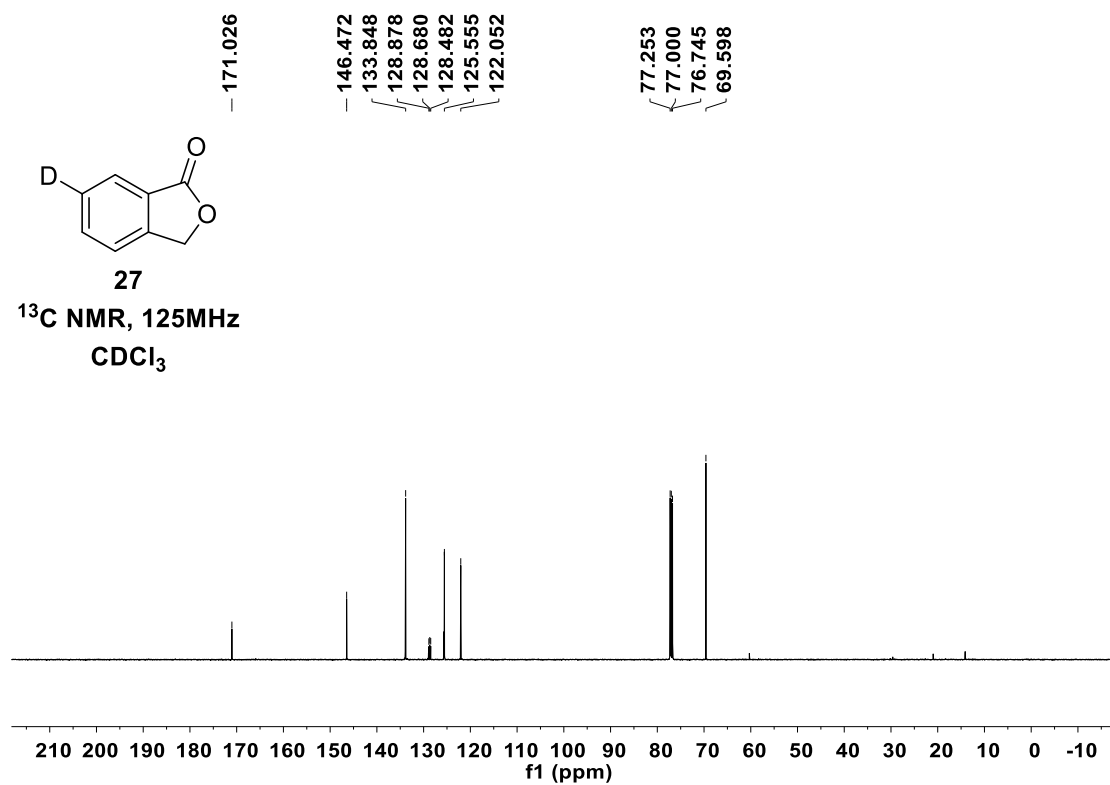

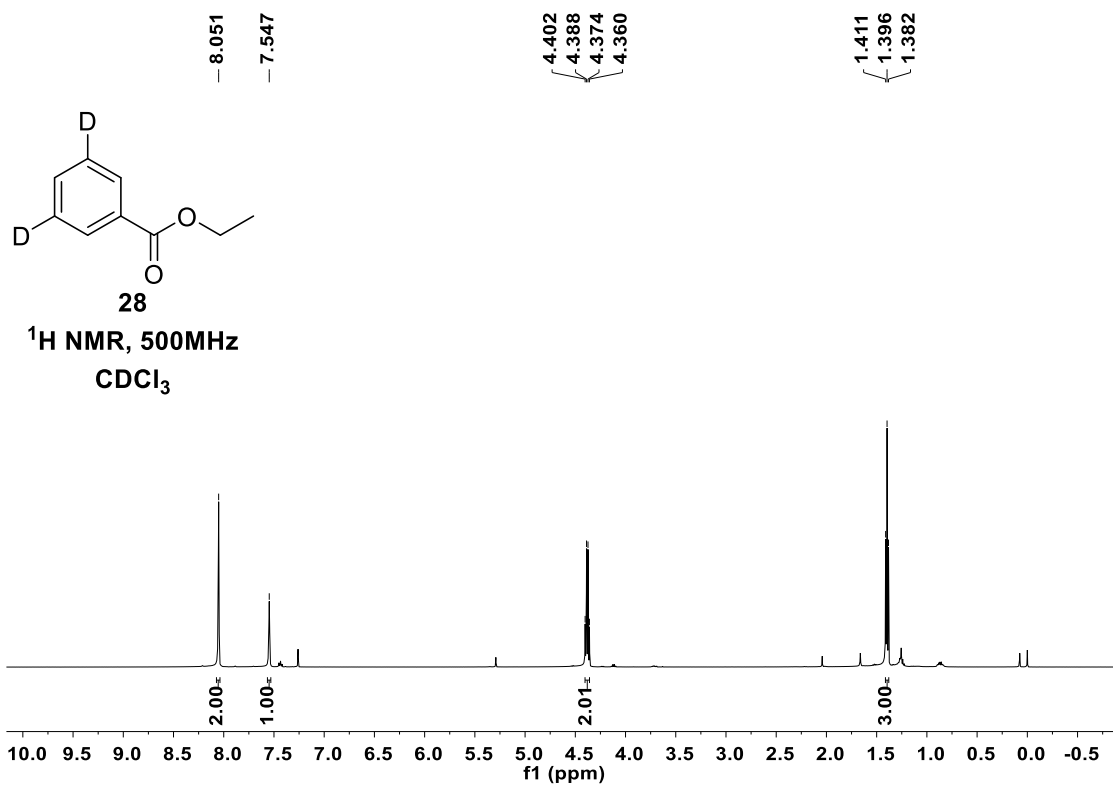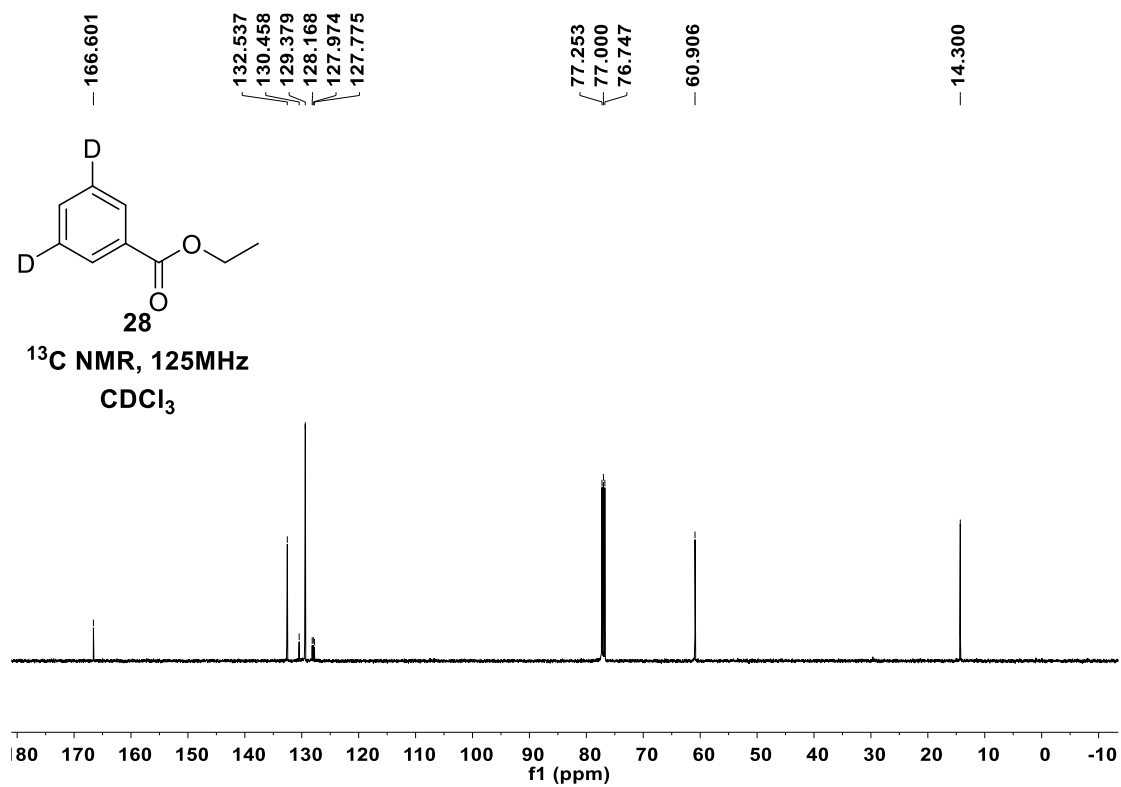

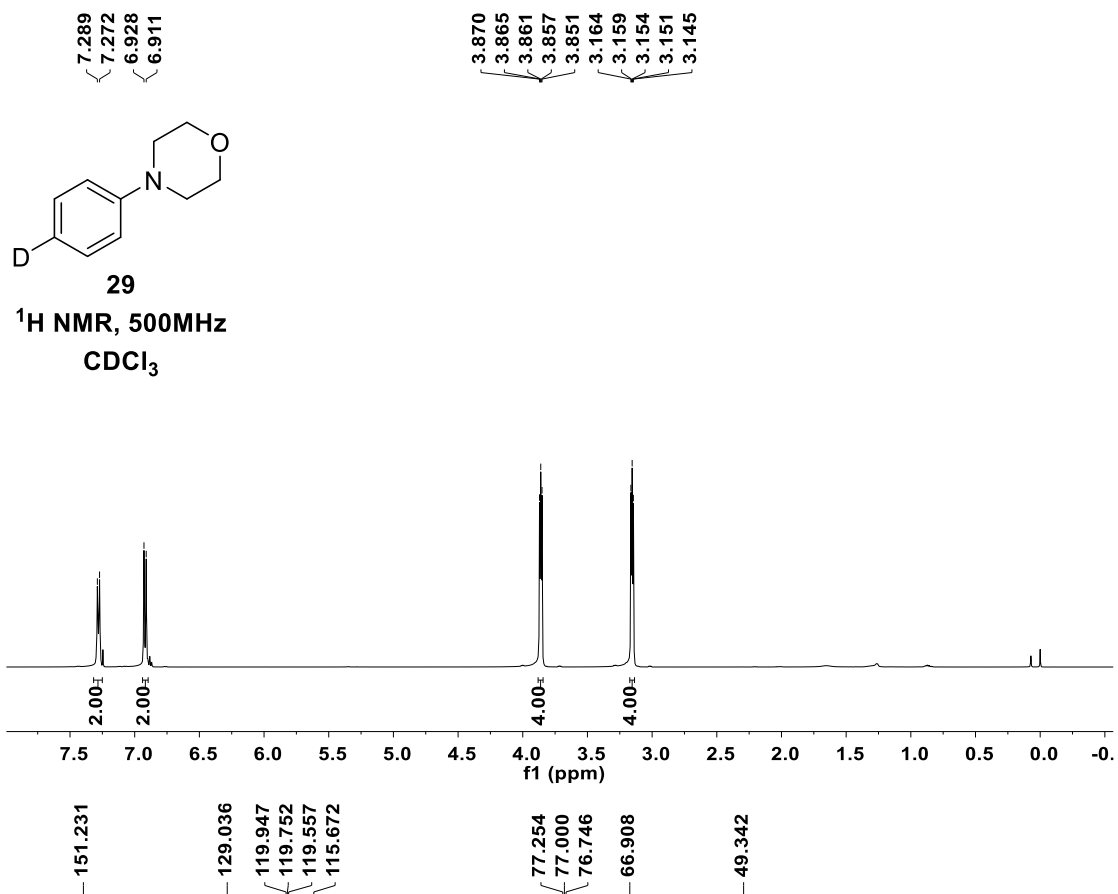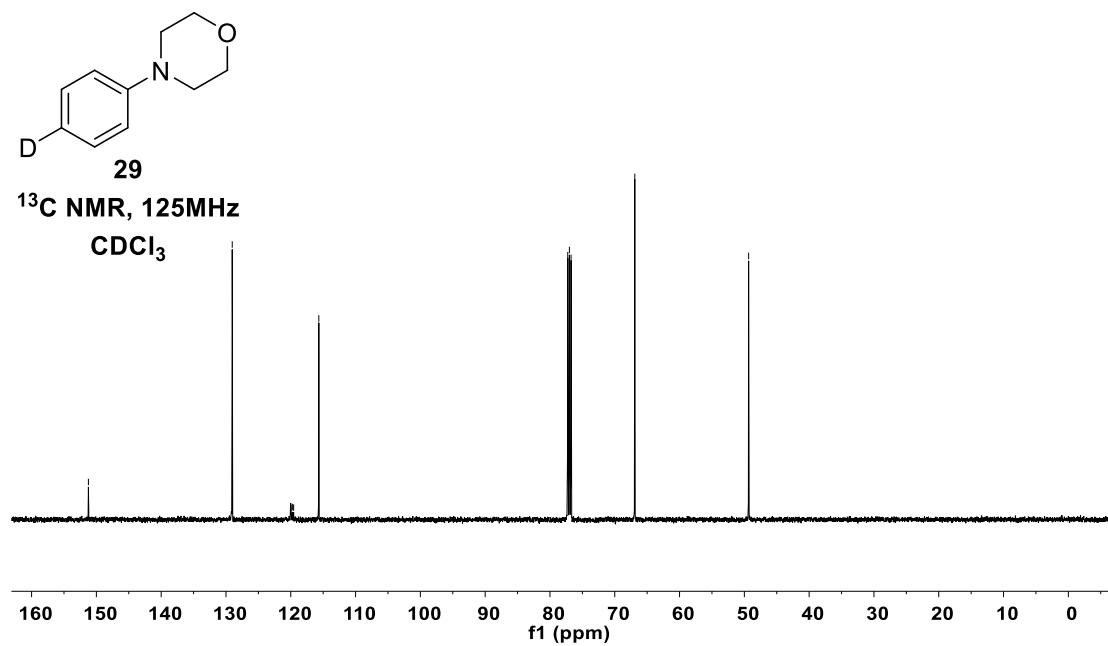

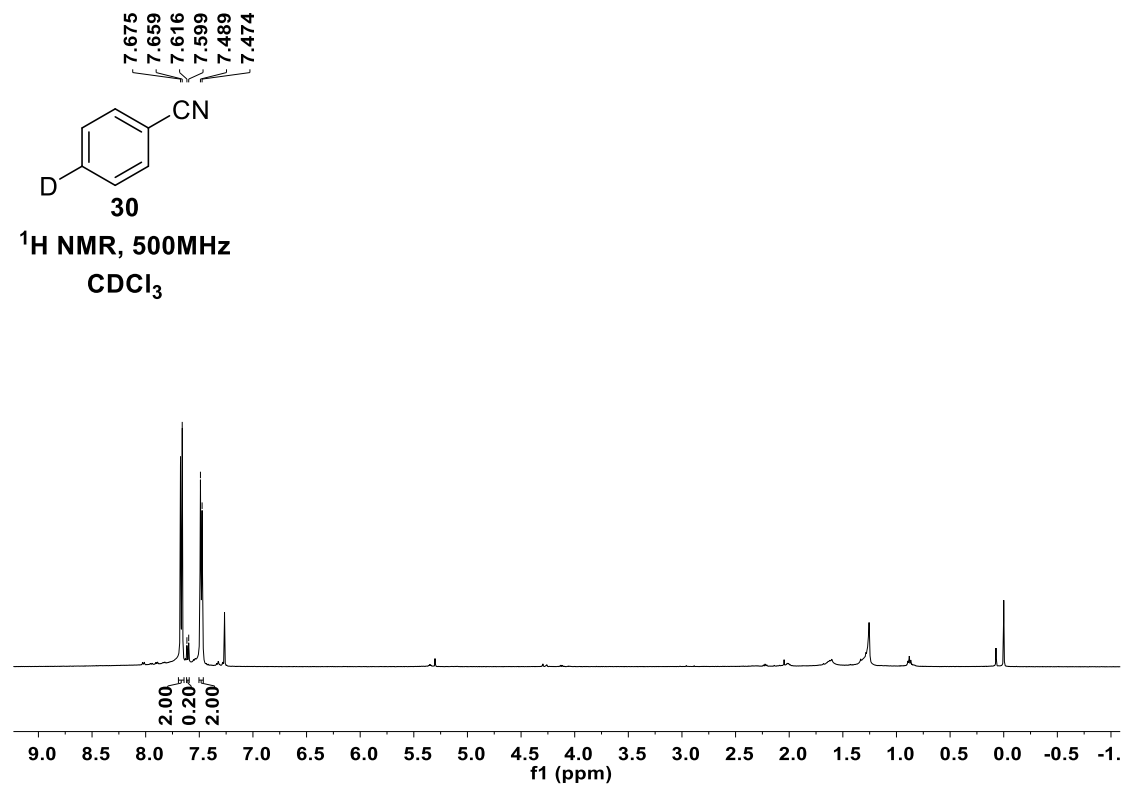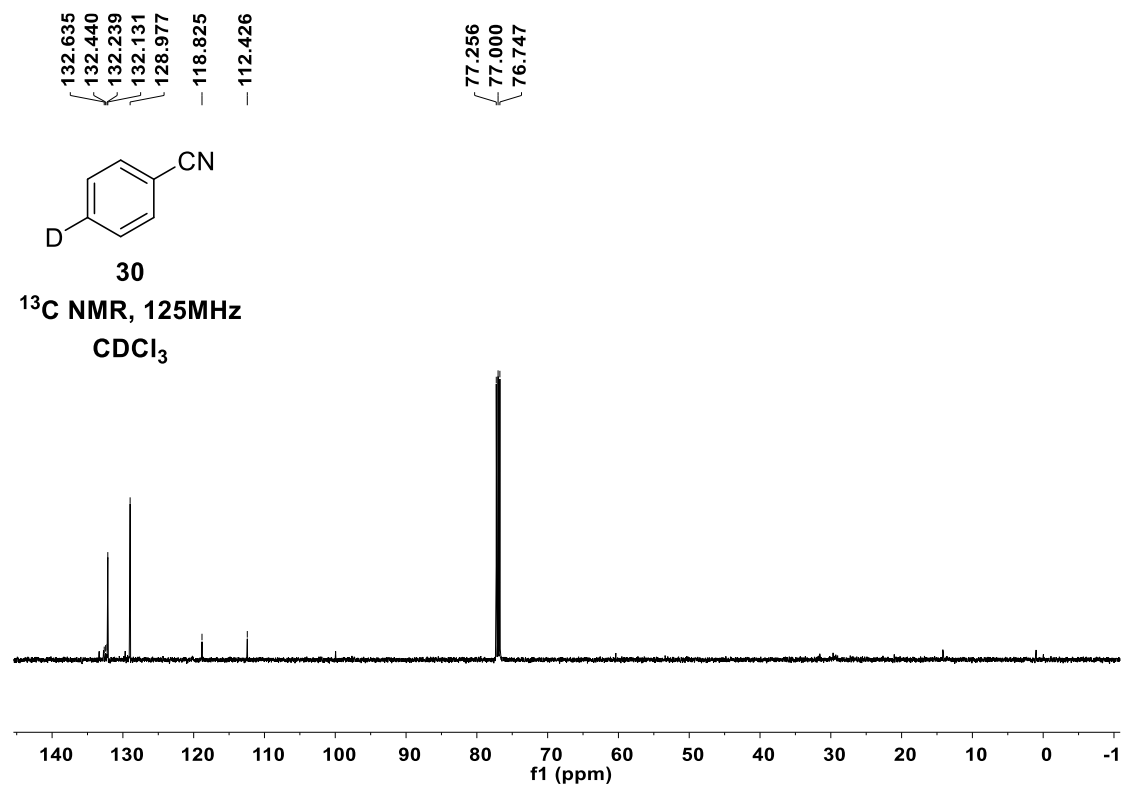

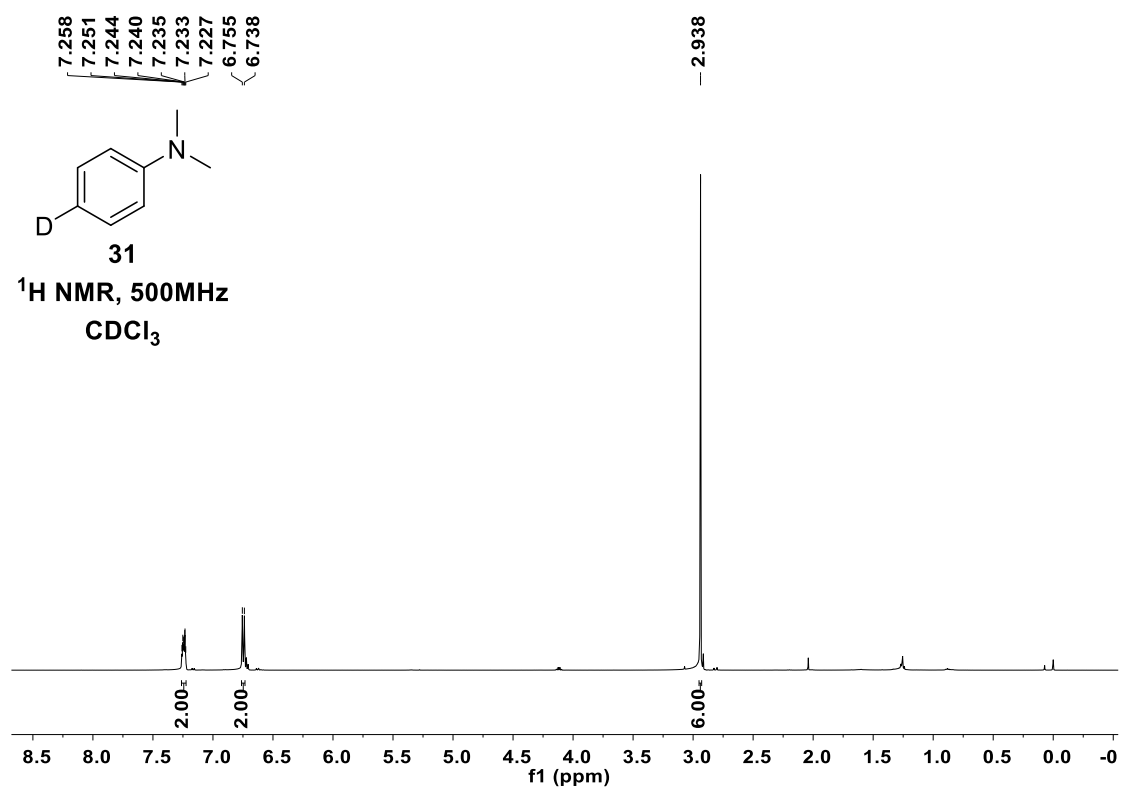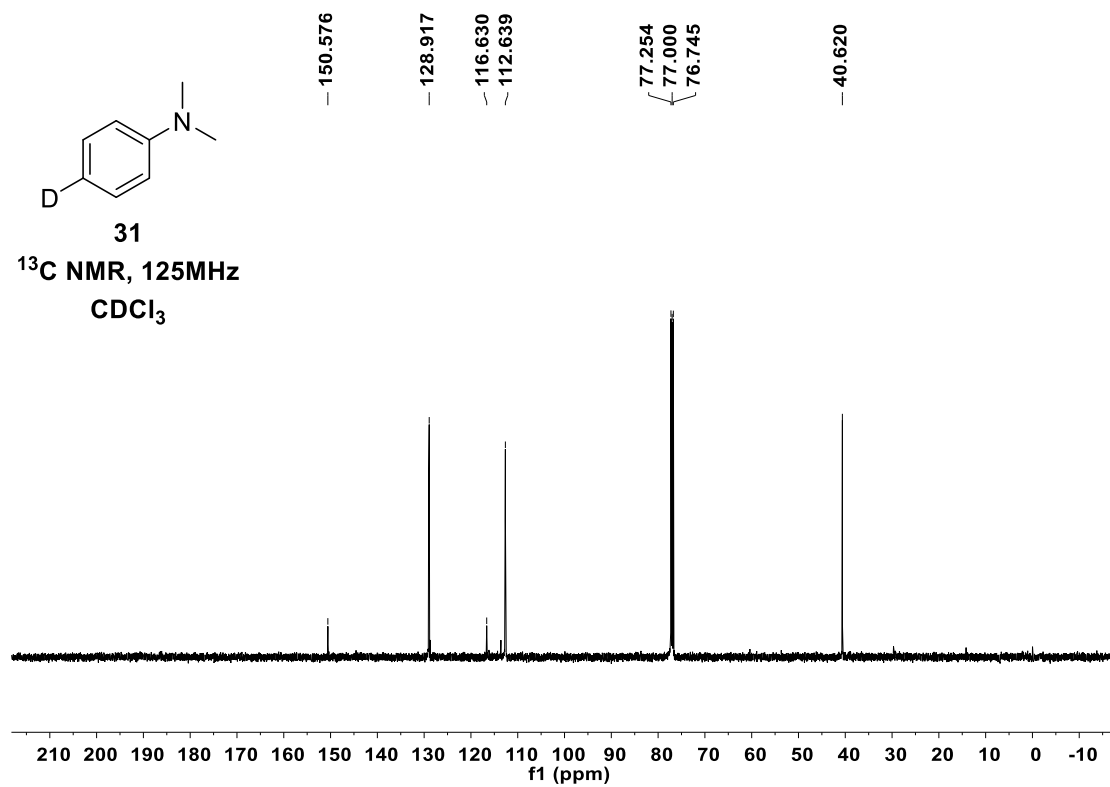

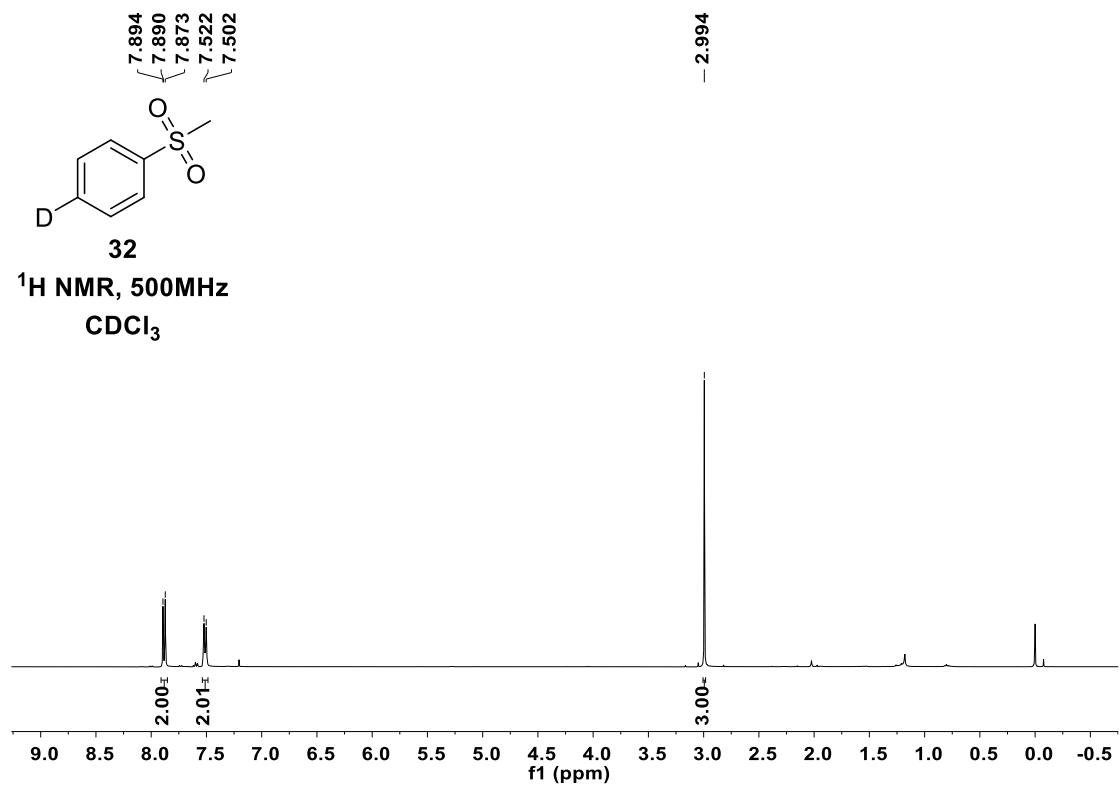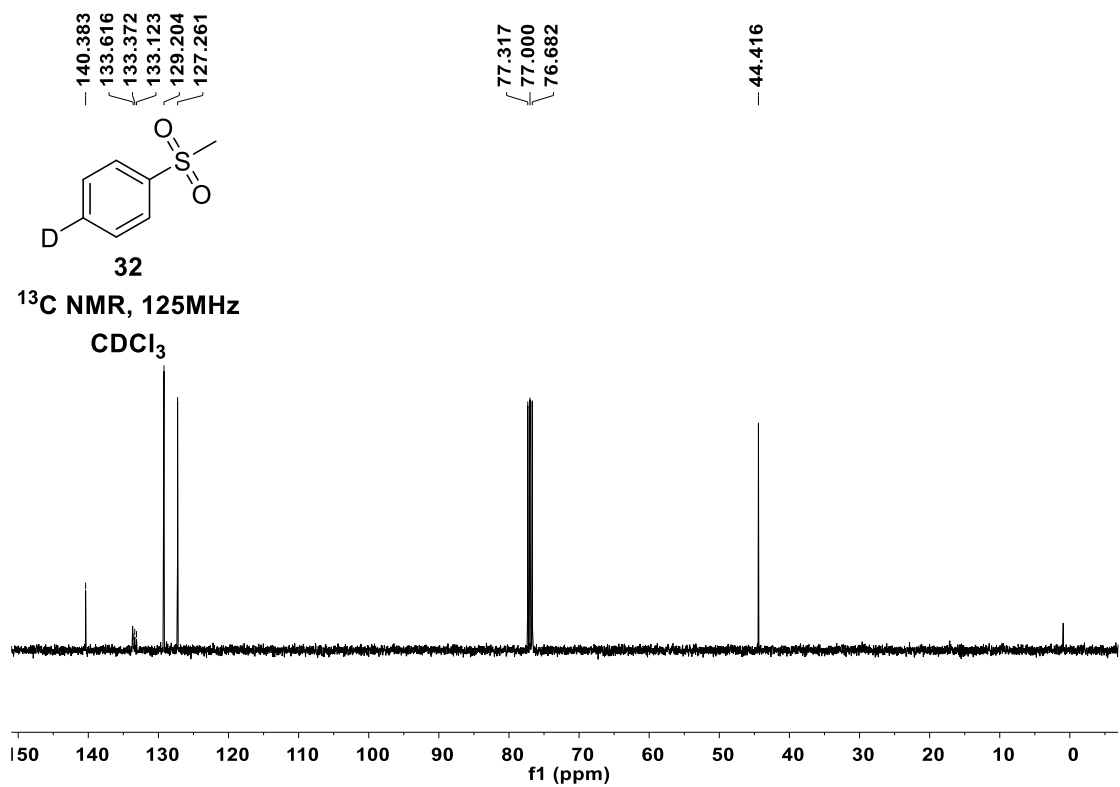

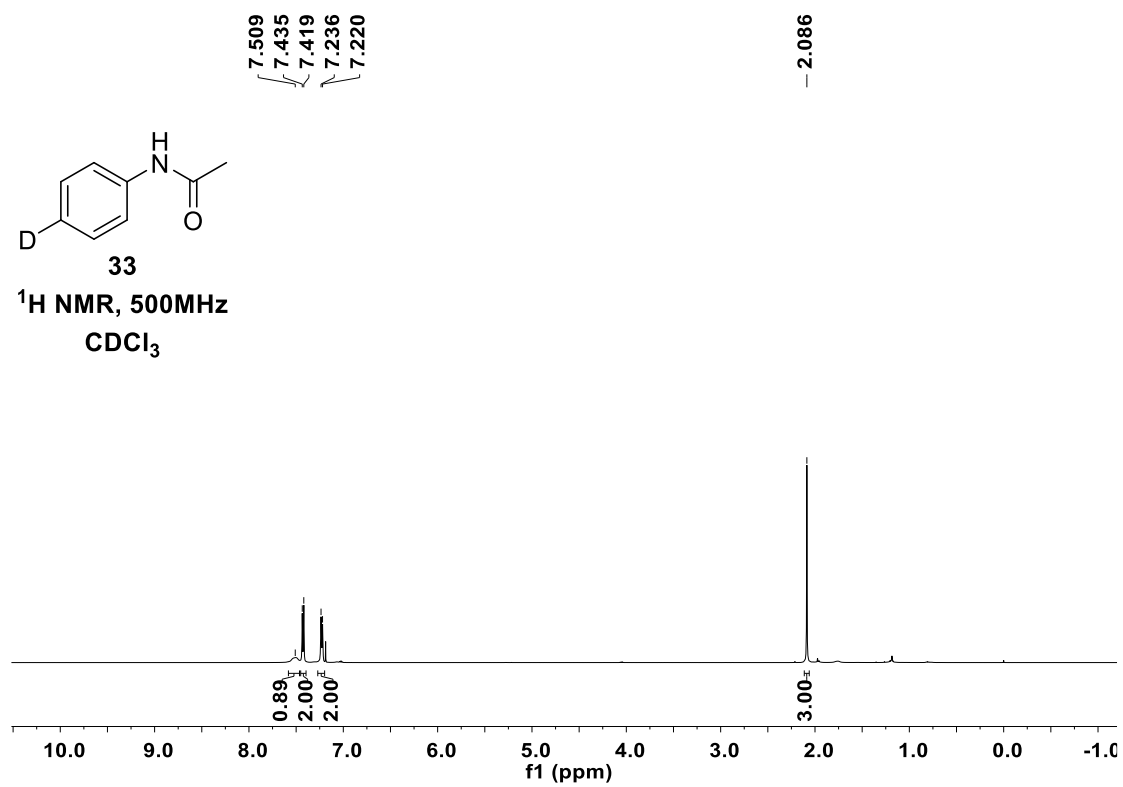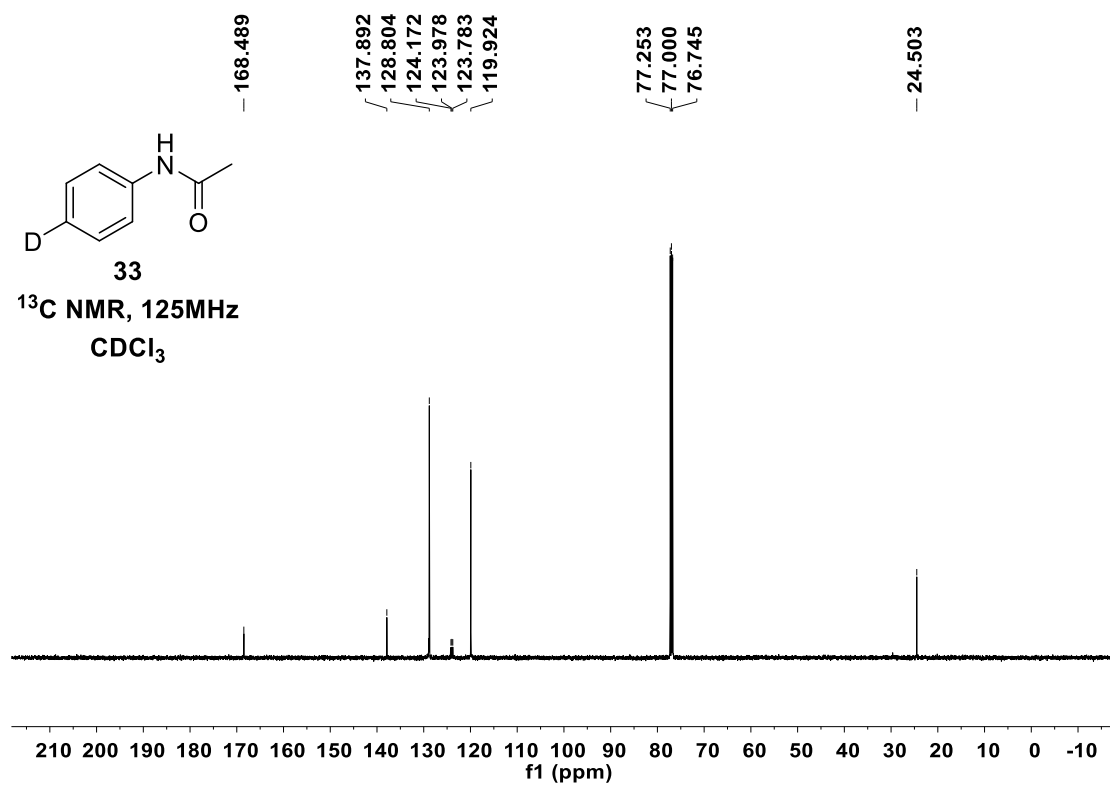

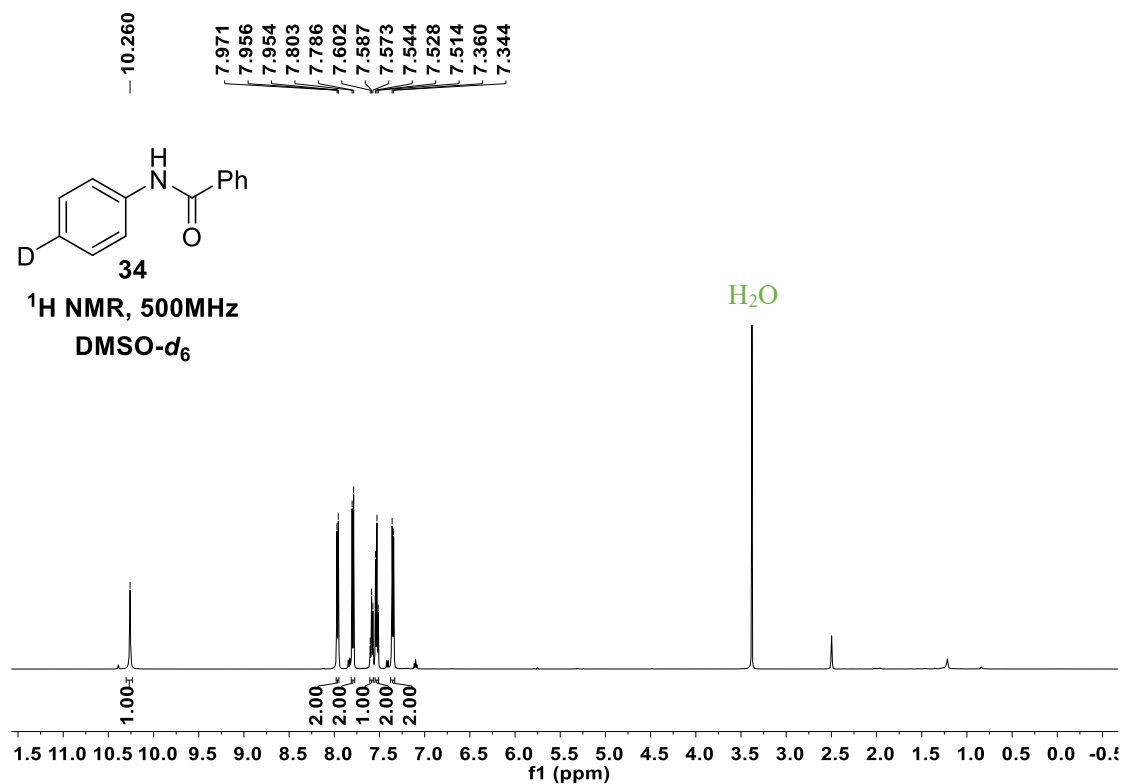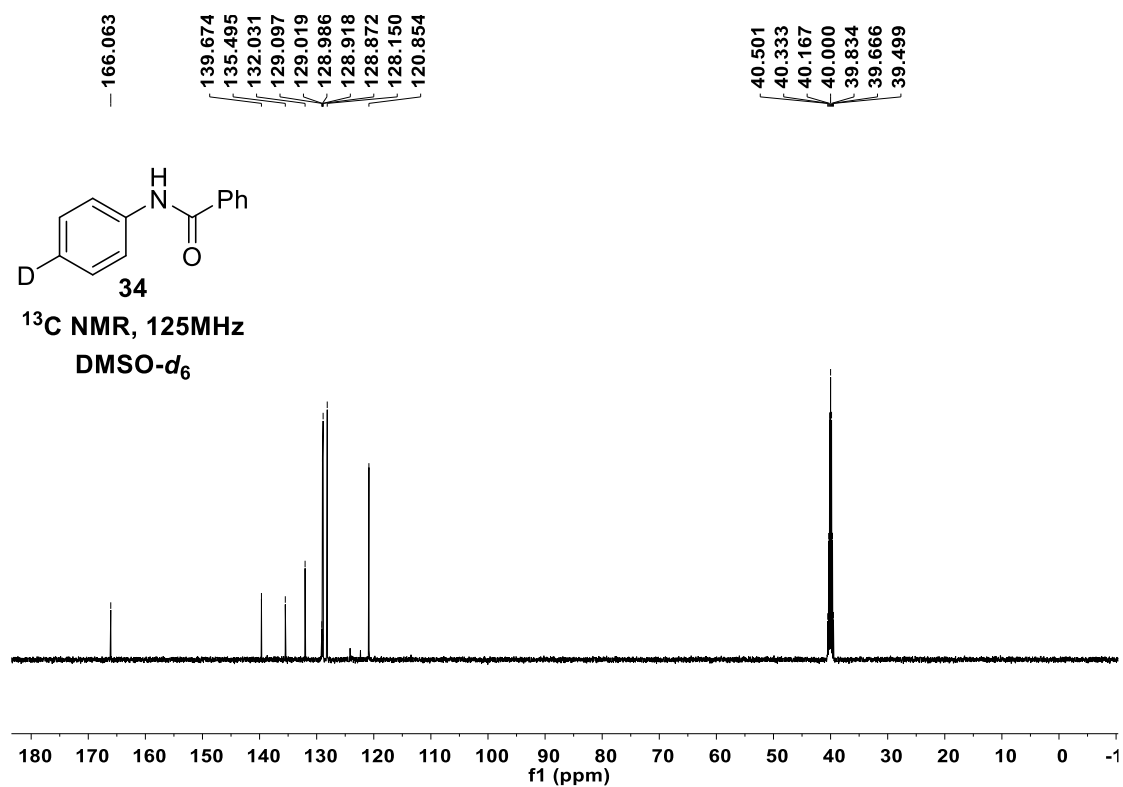

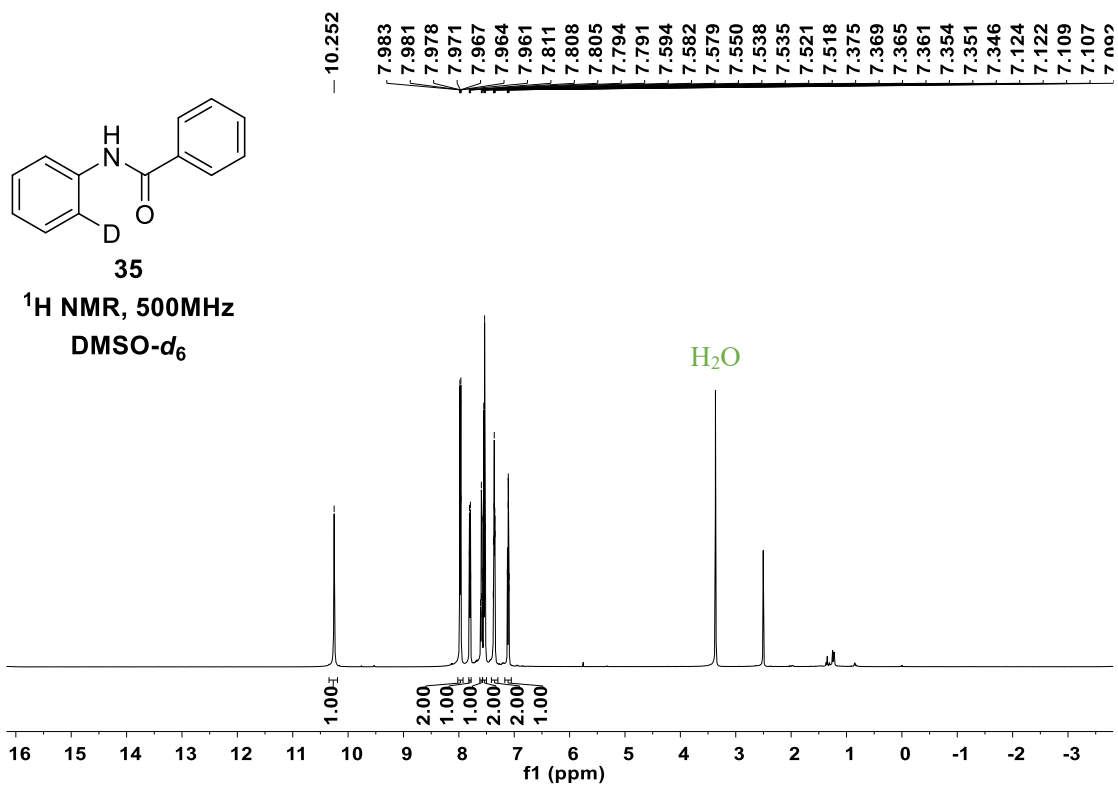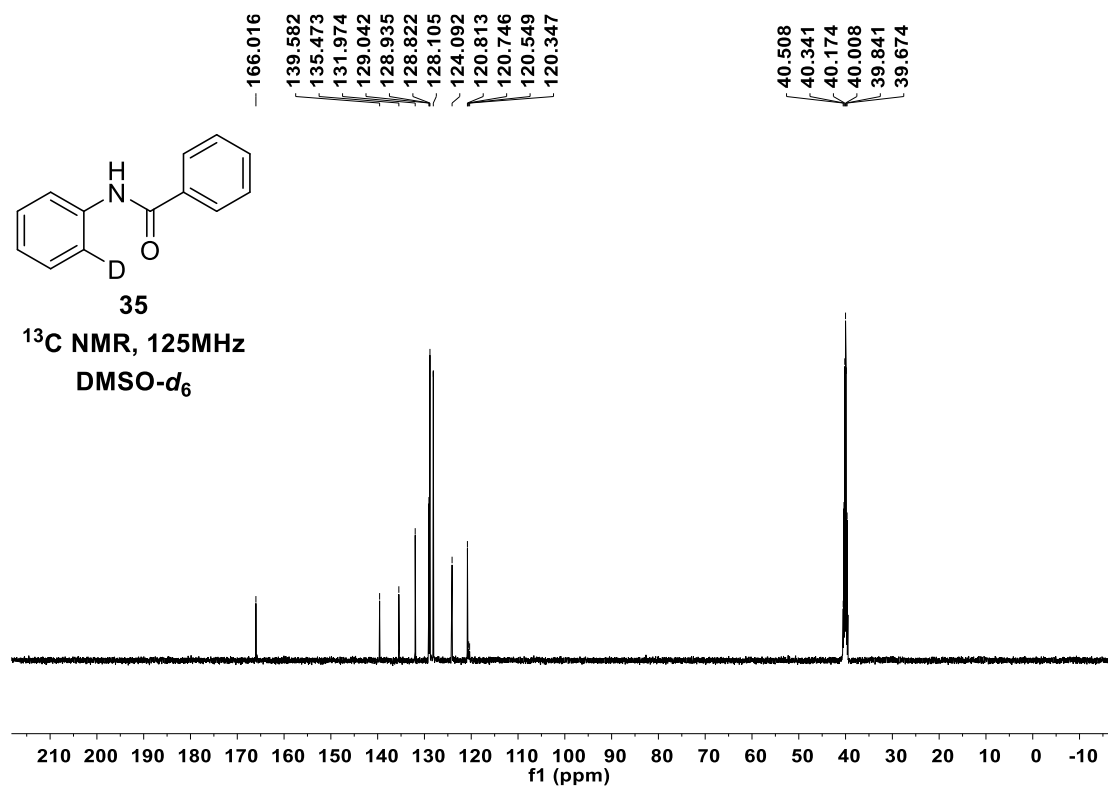

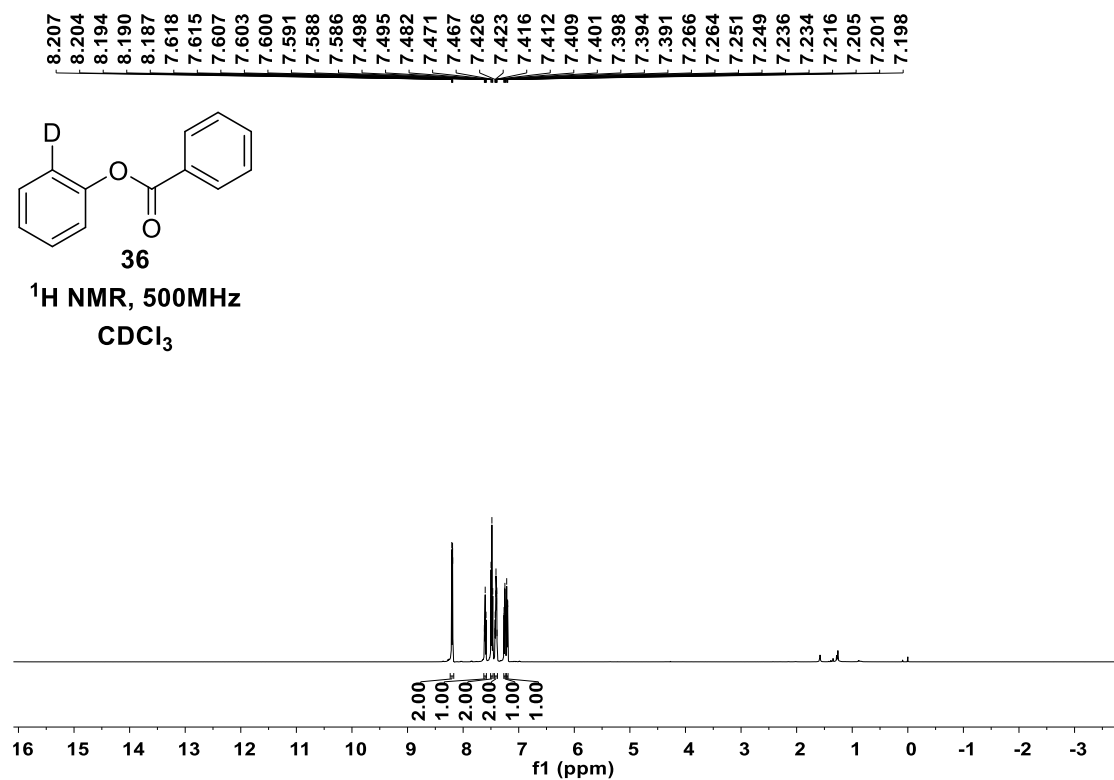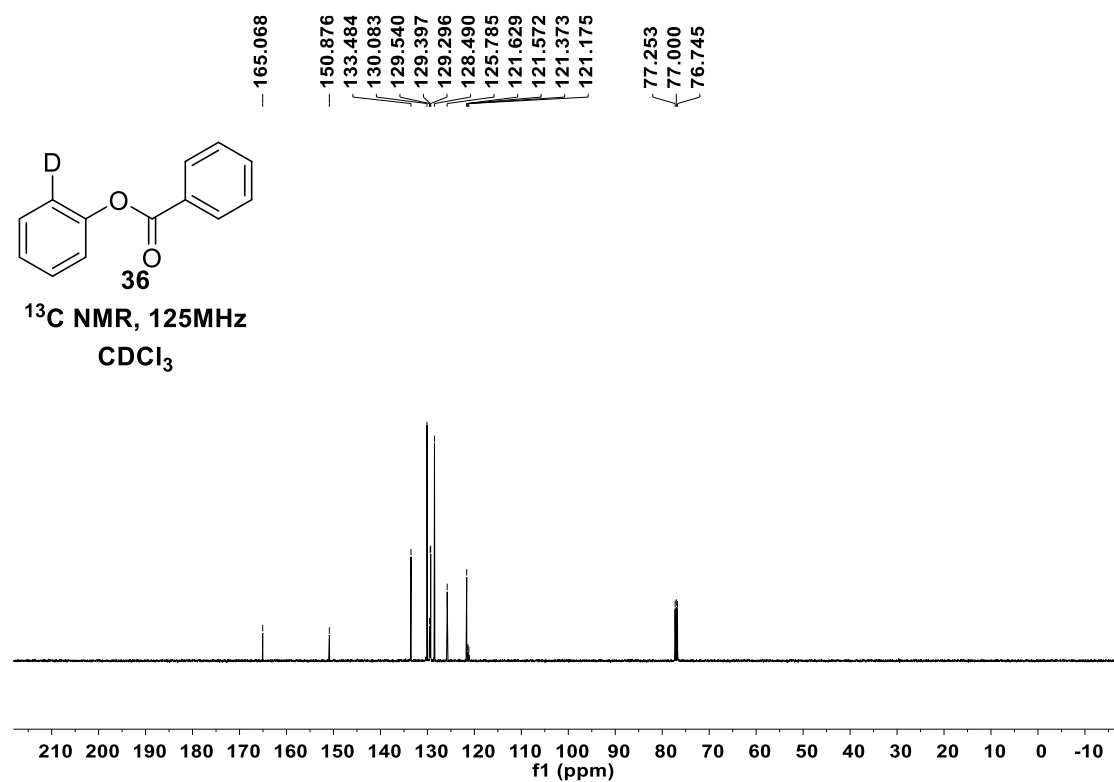

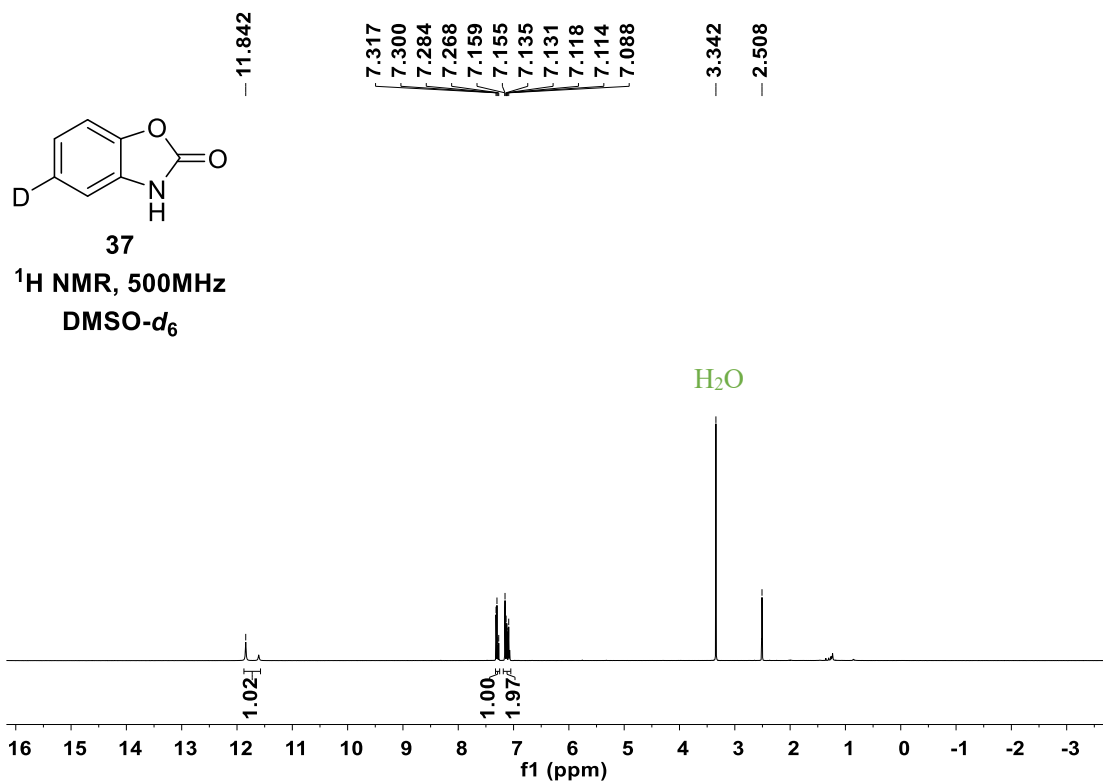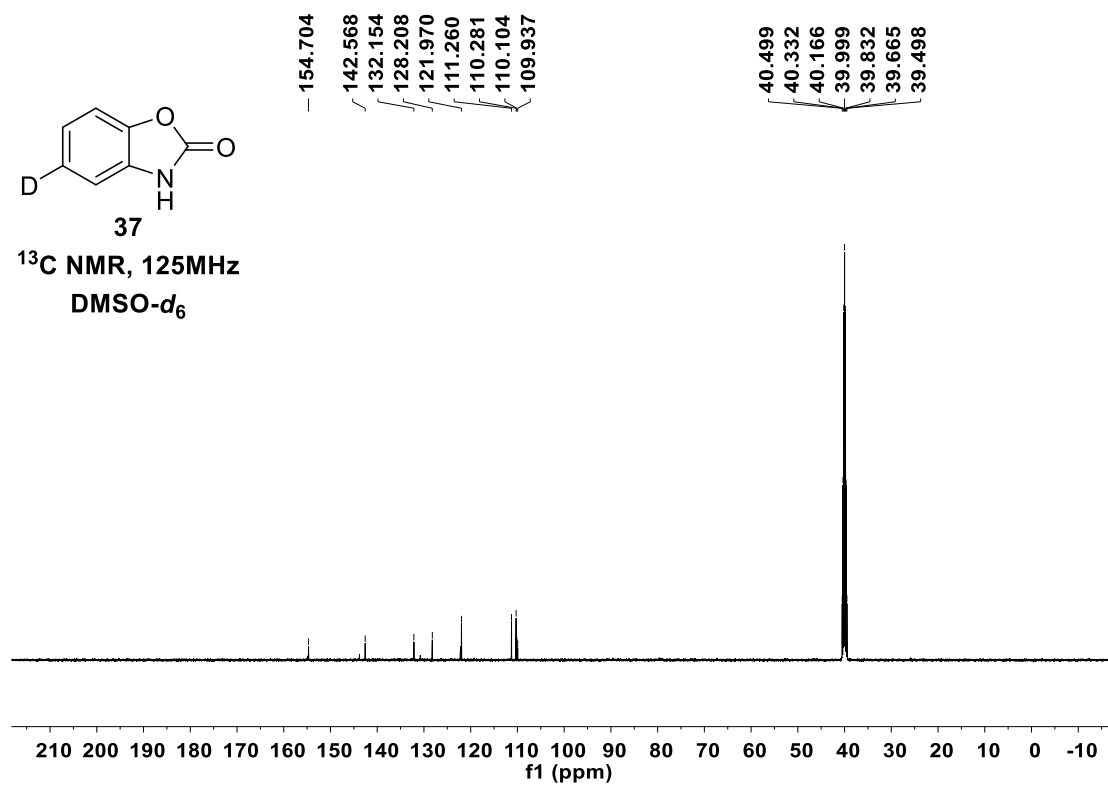

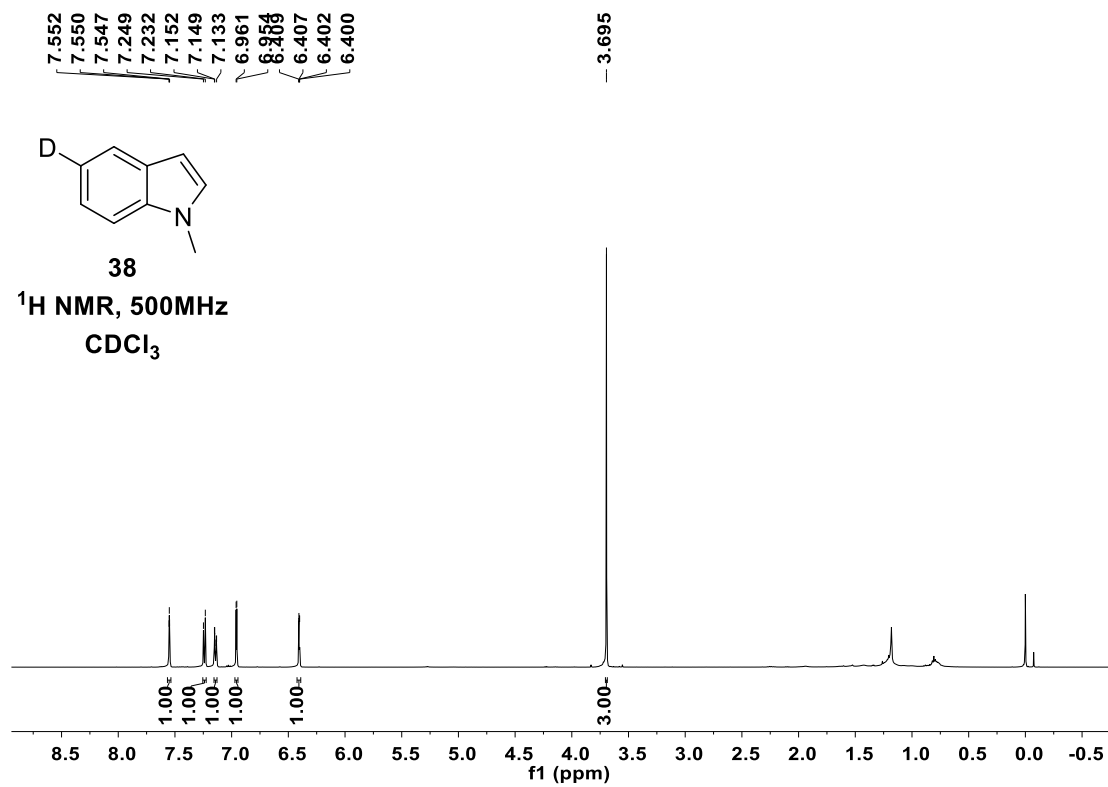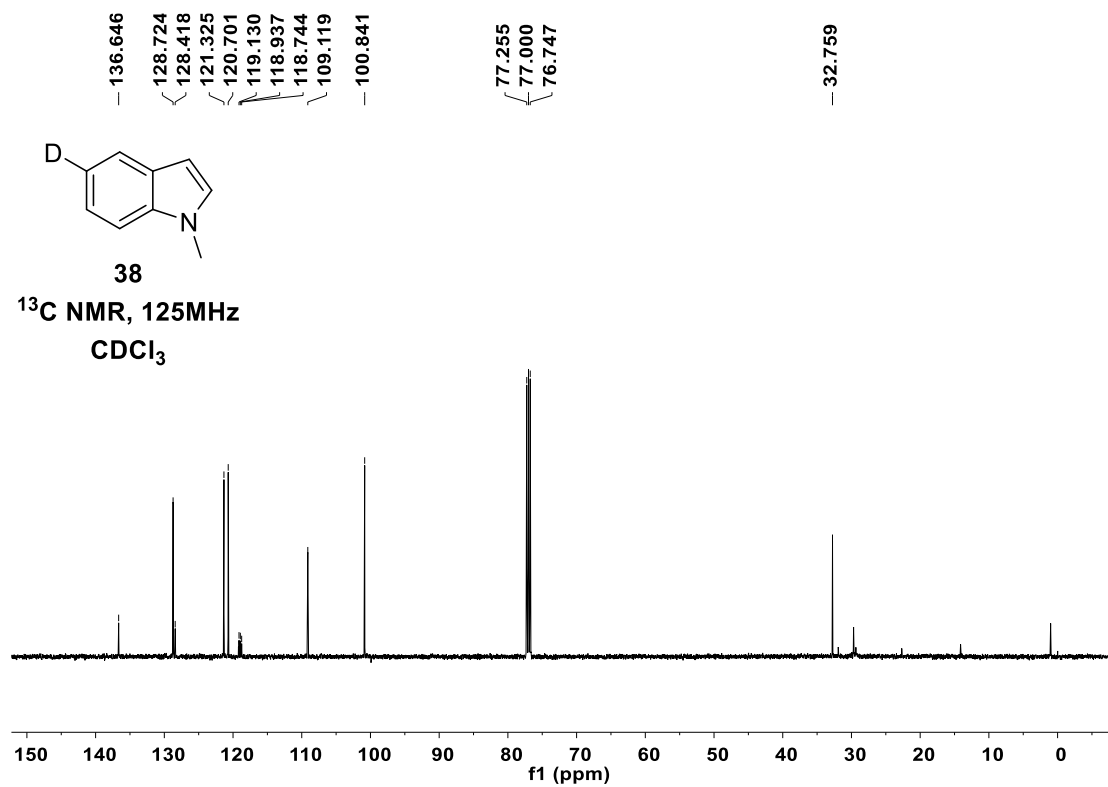

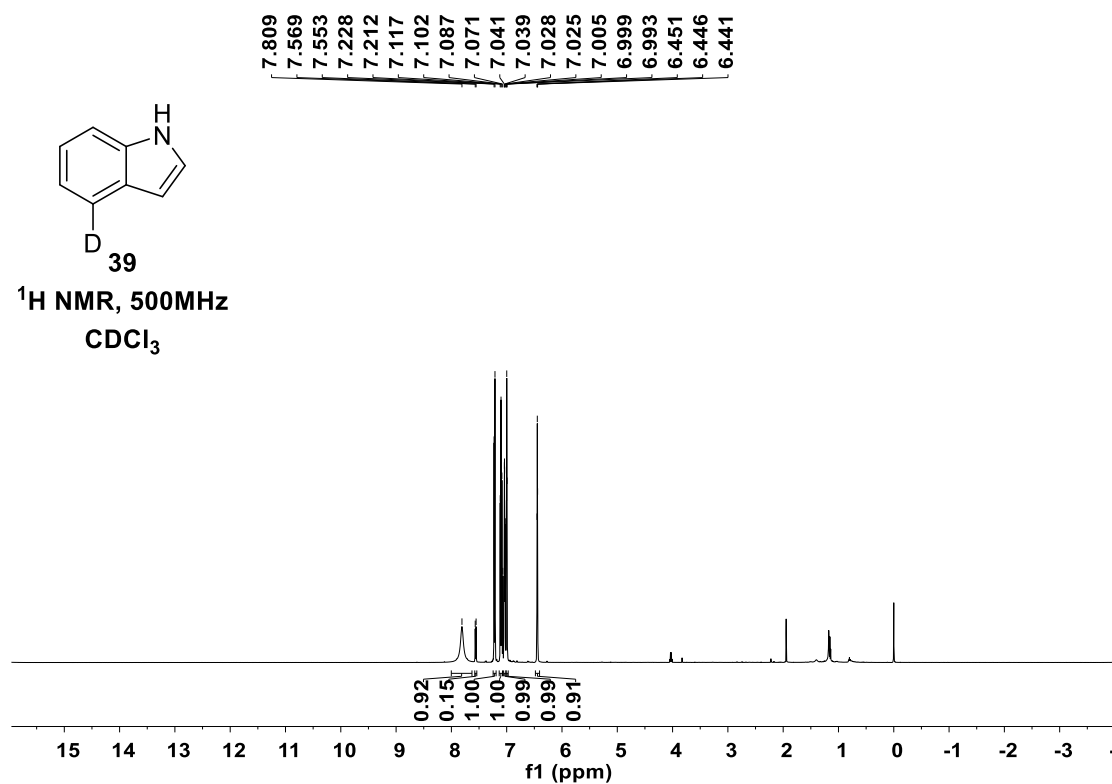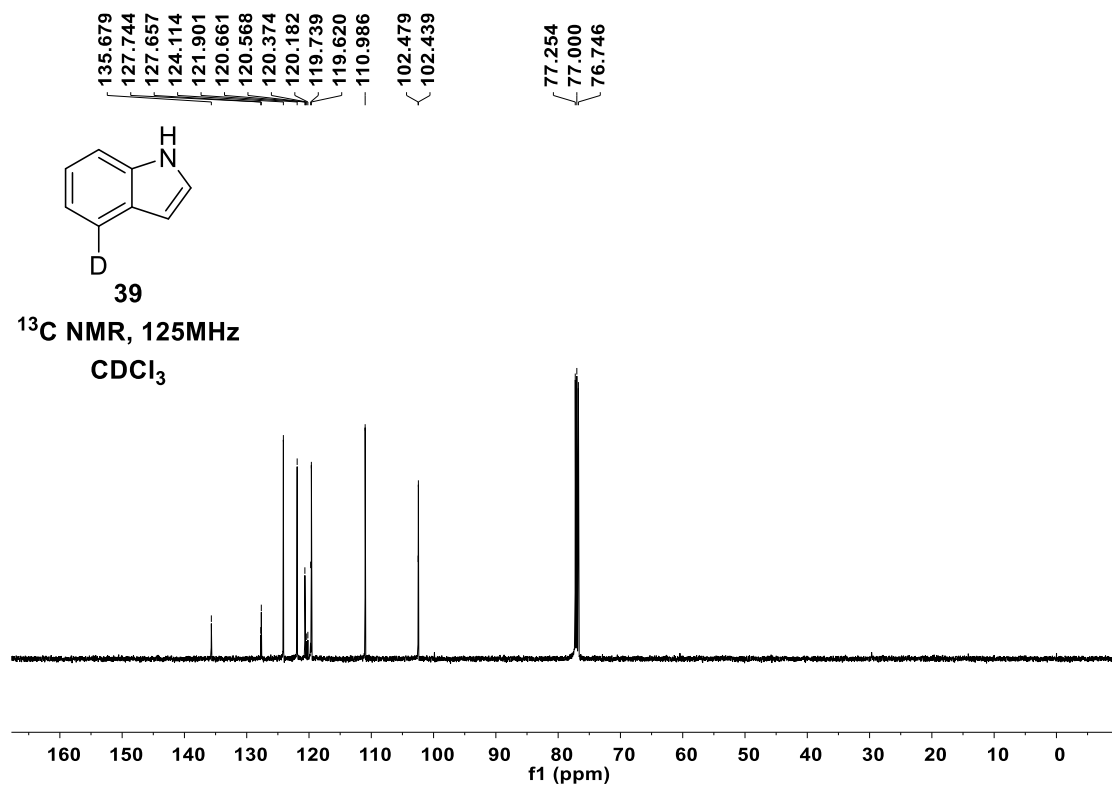

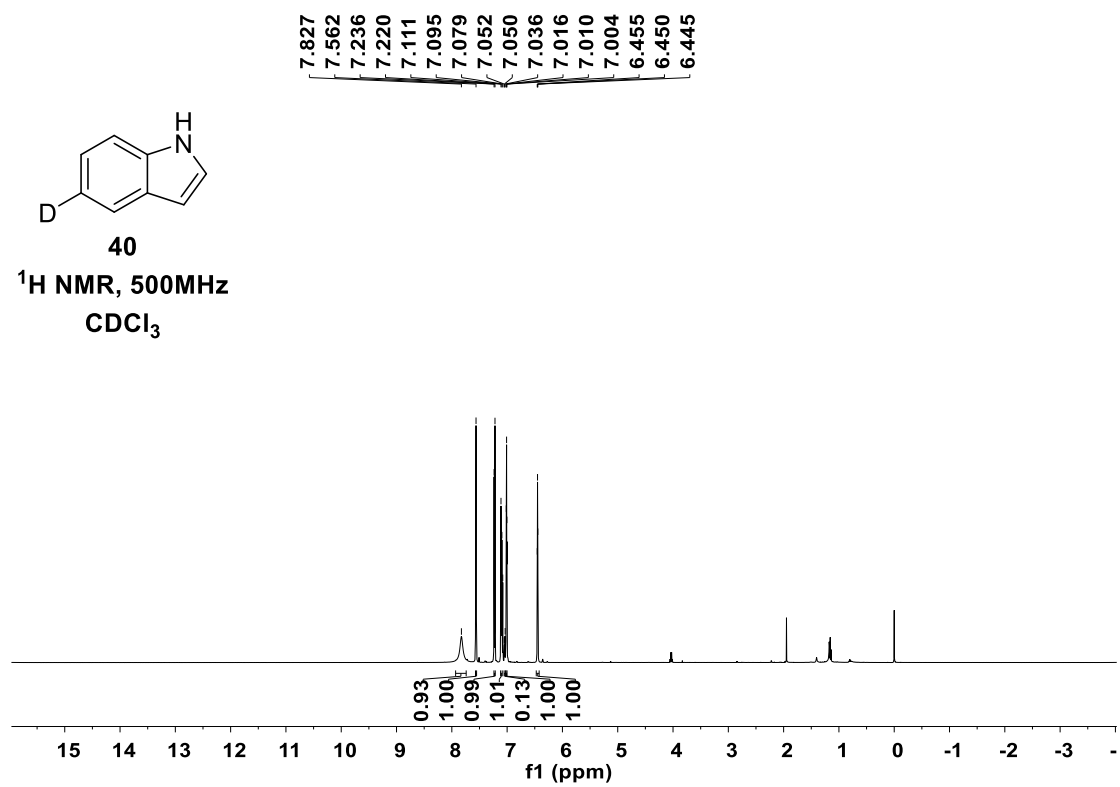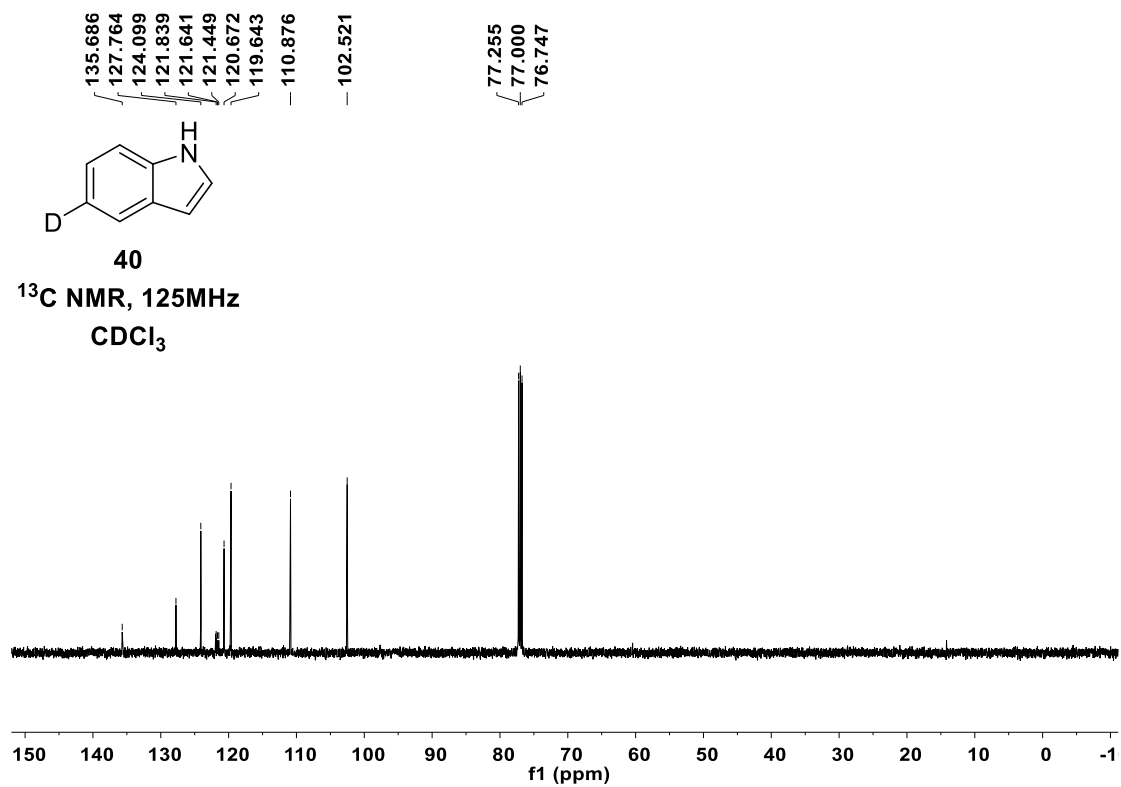

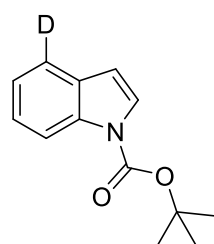

41

<sup>1</sup>H NMR, 500MHz  
CDCl<sub>3</sub>

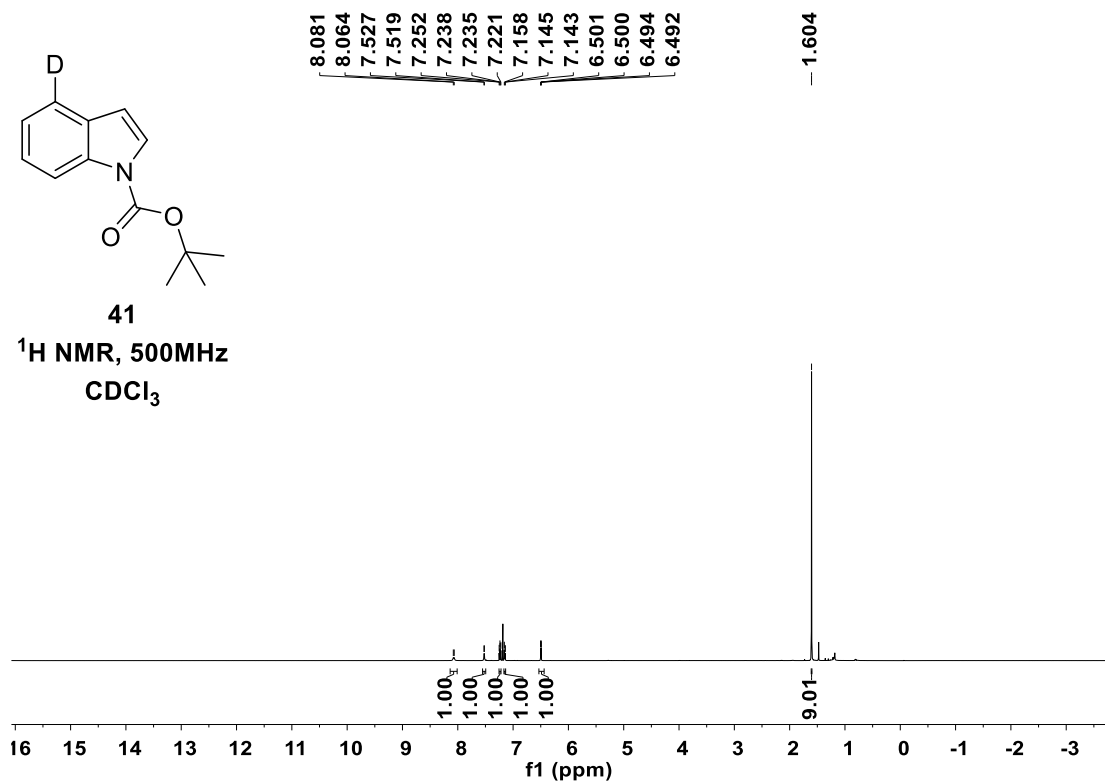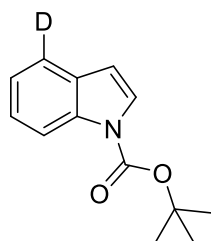

41

<sup>13</sup>C NMR, 125MHz  
CDCl<sub>3</sub>

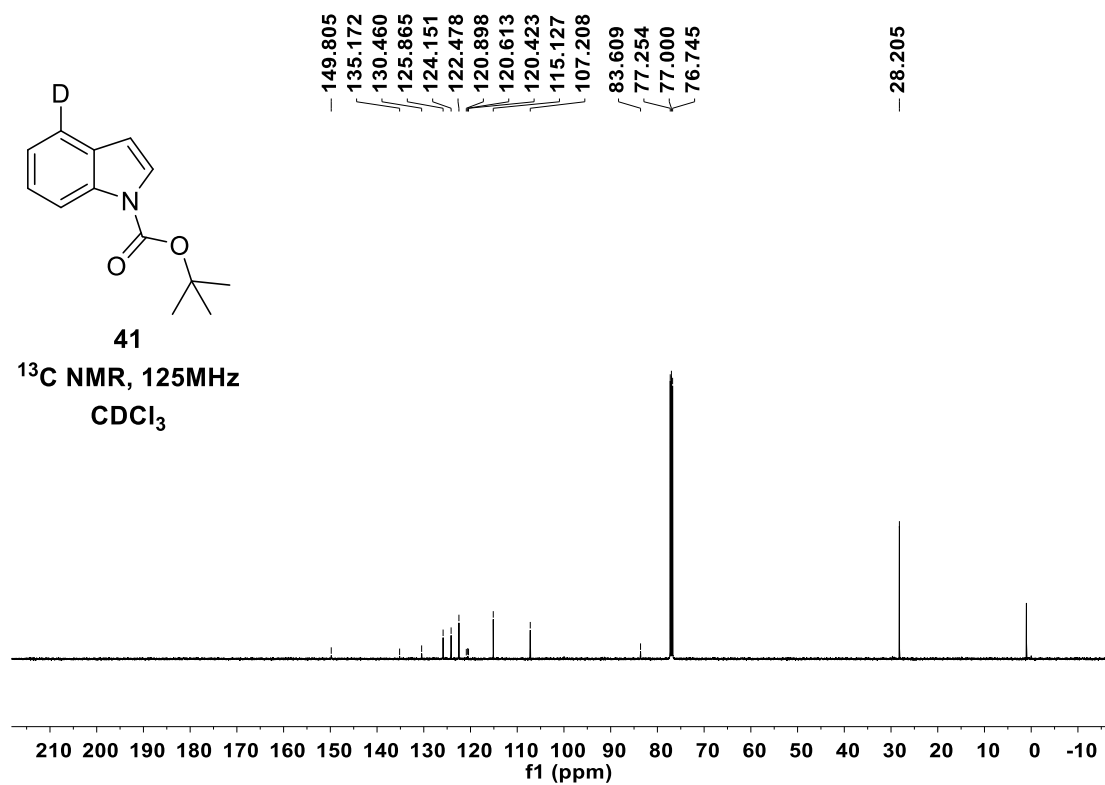

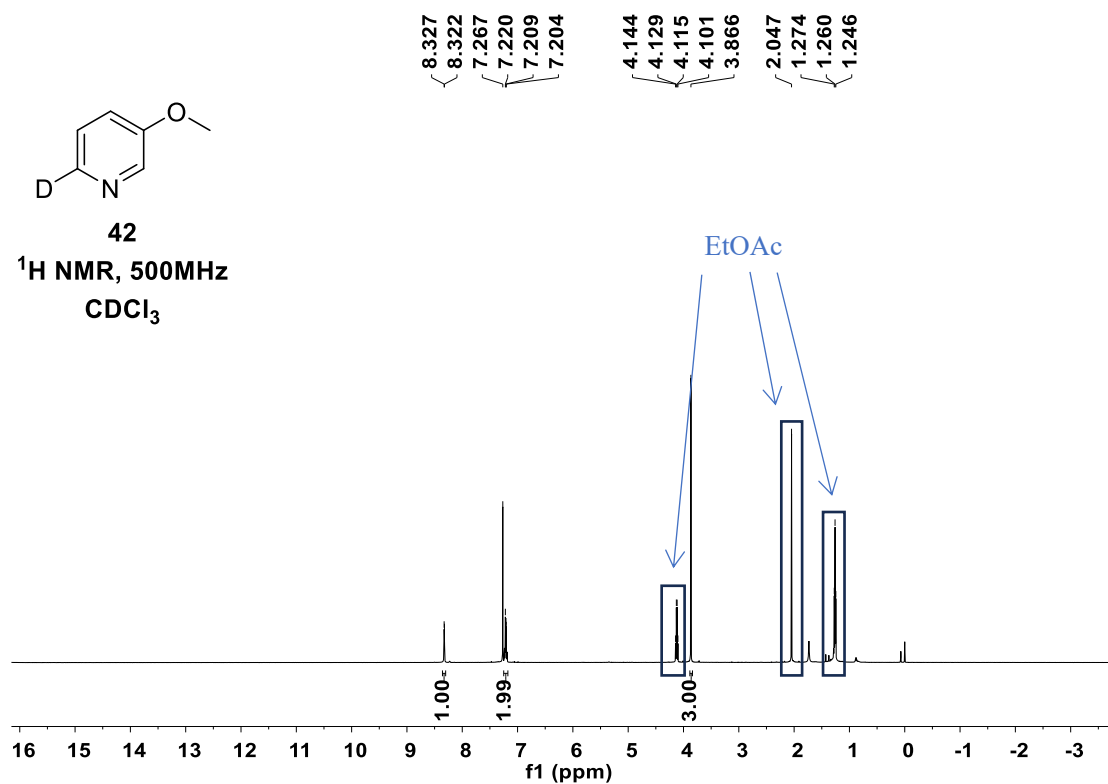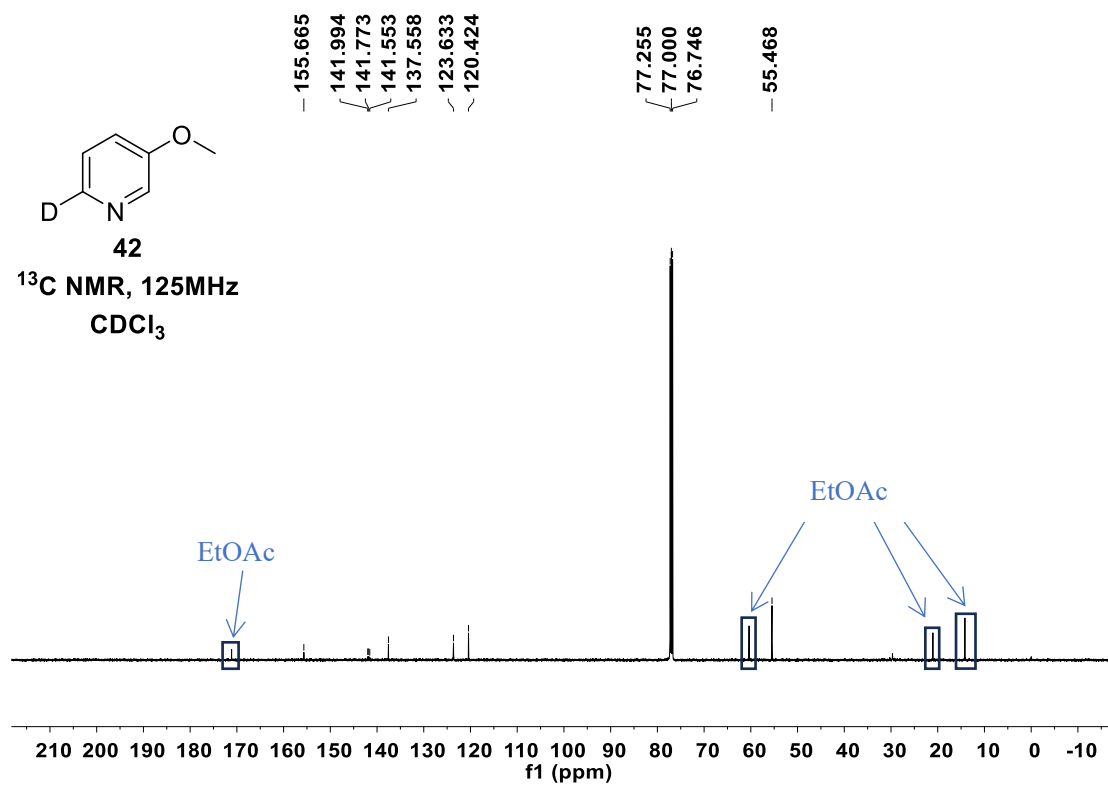

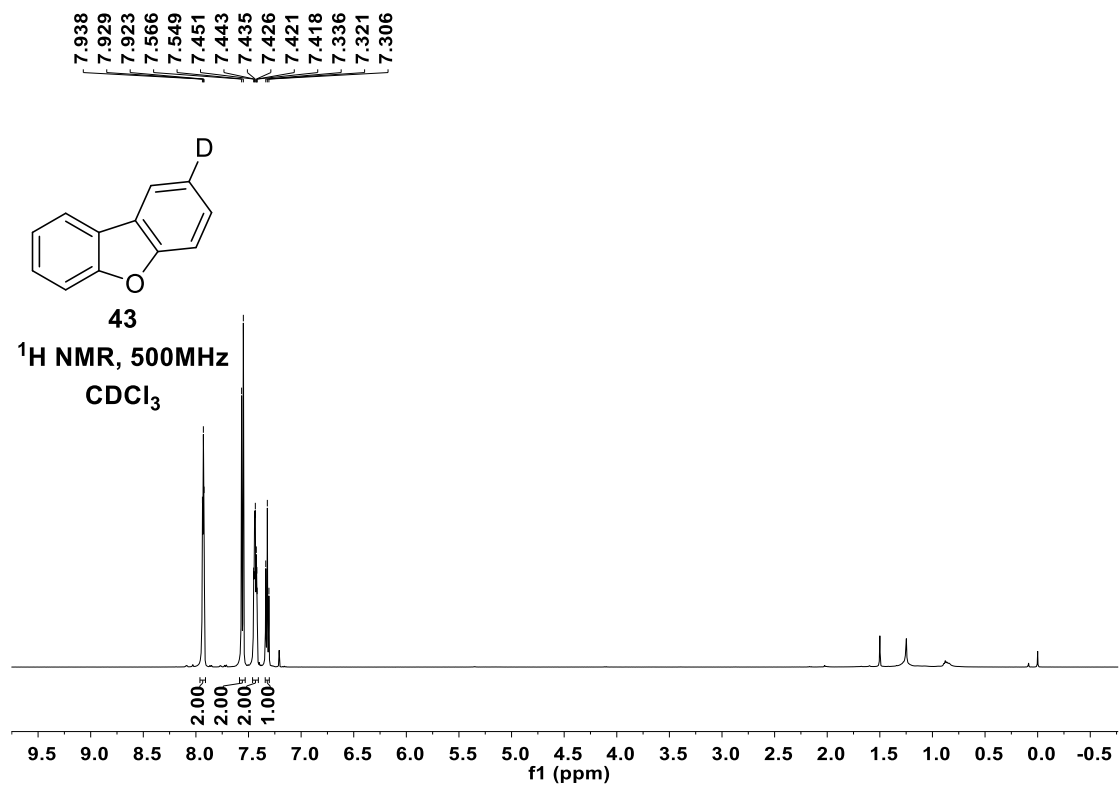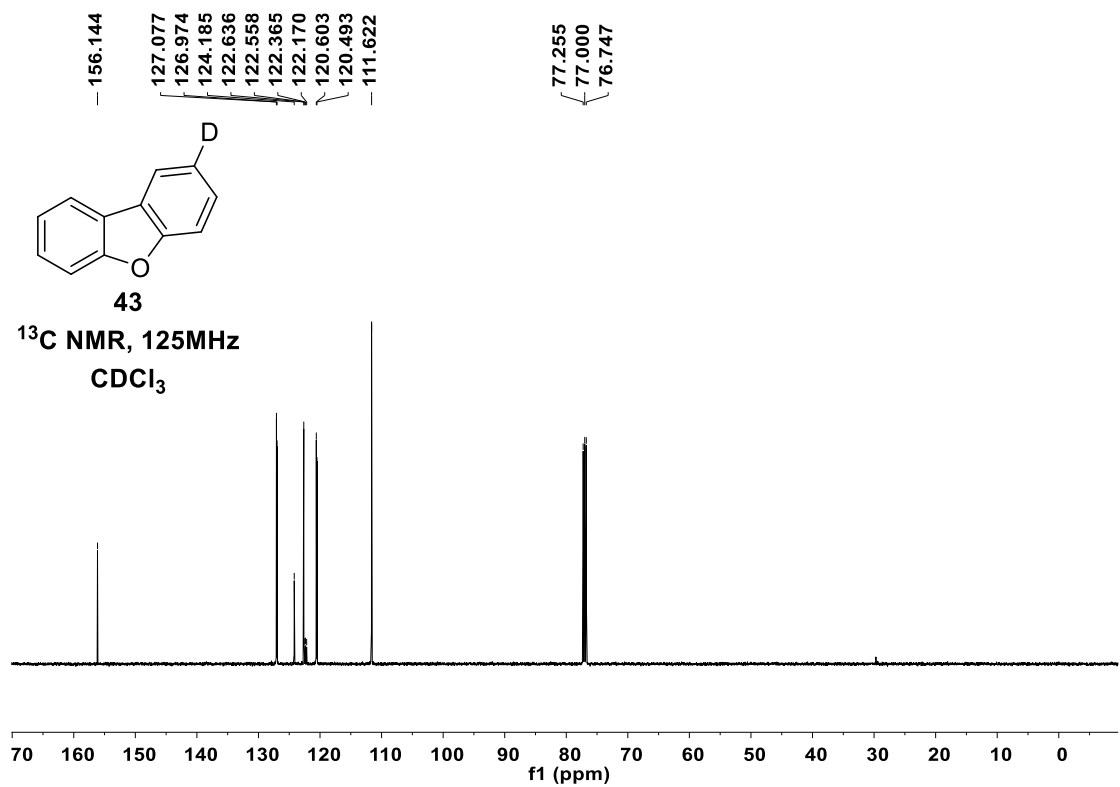

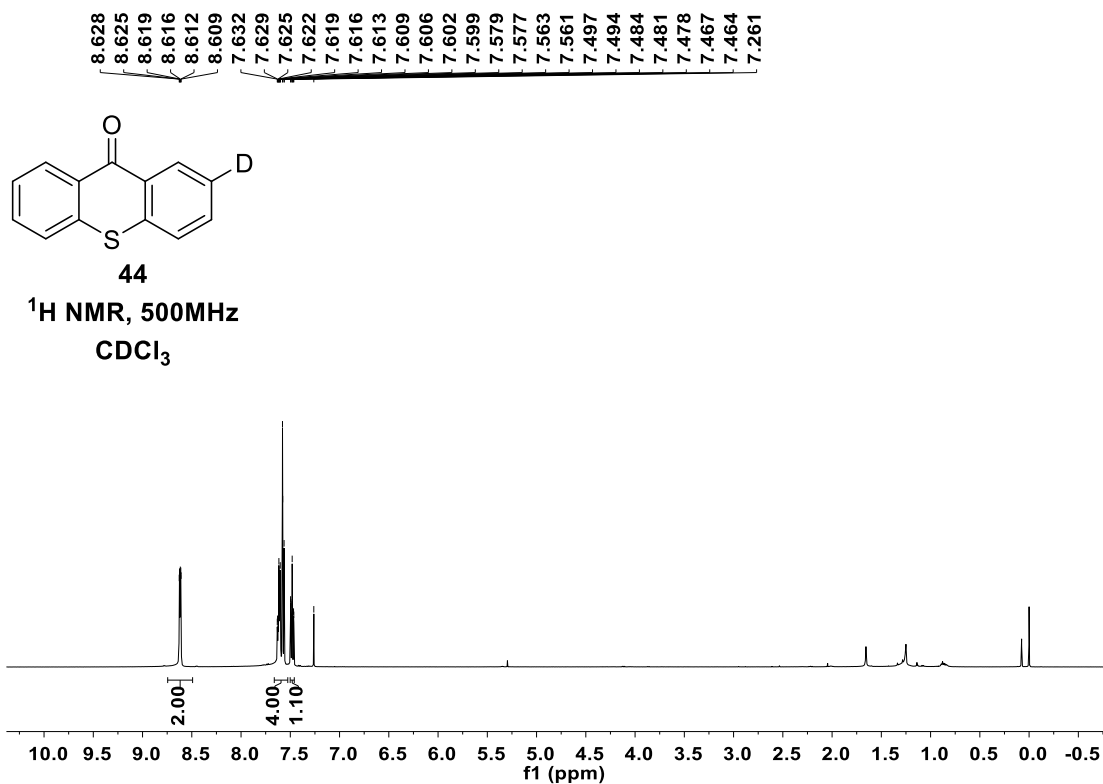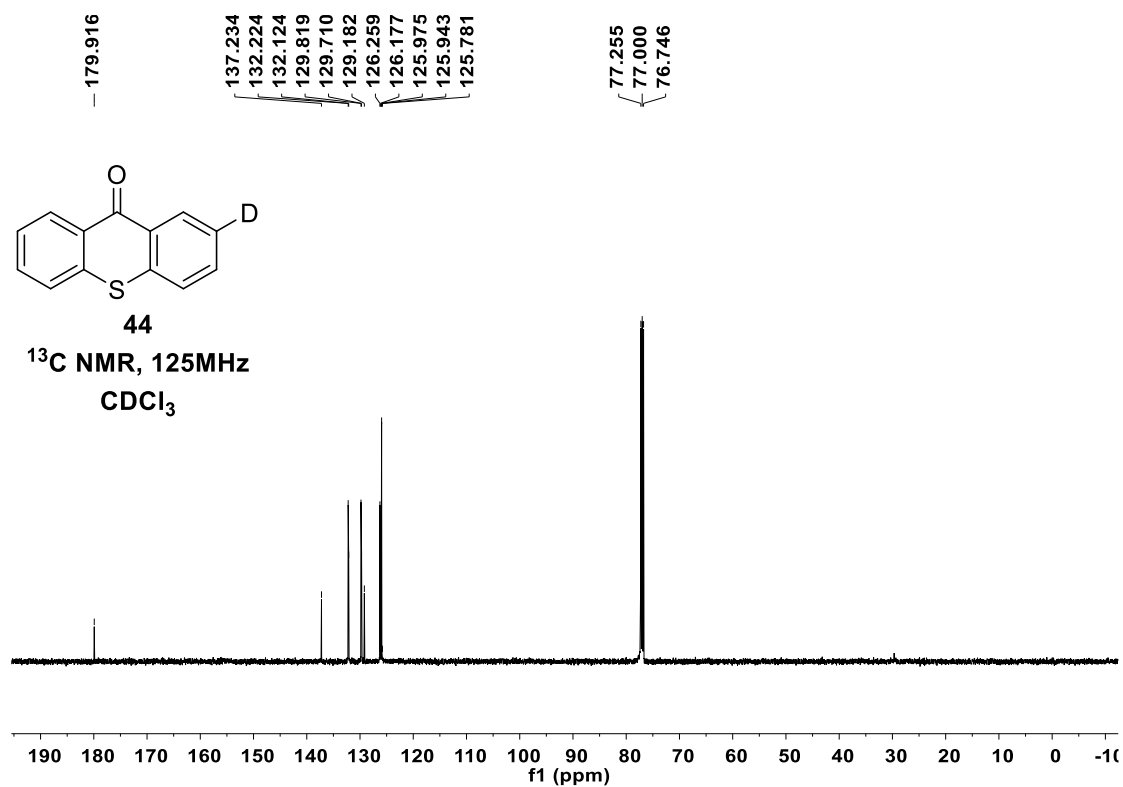

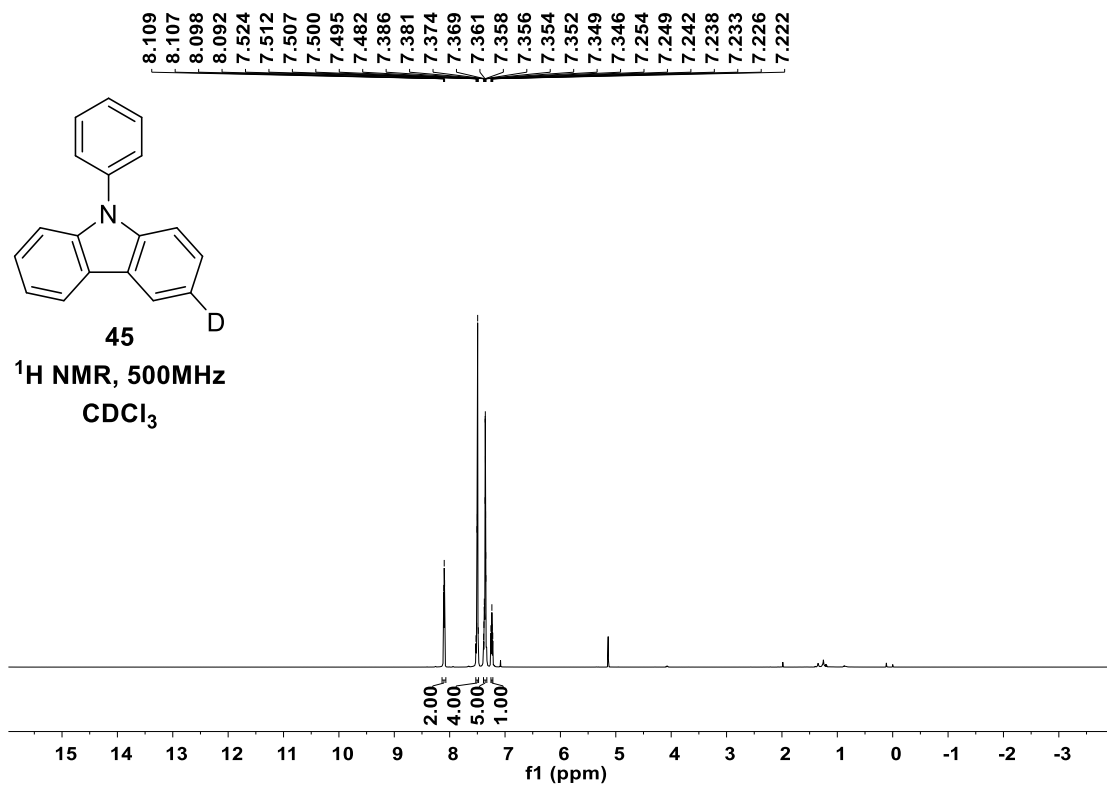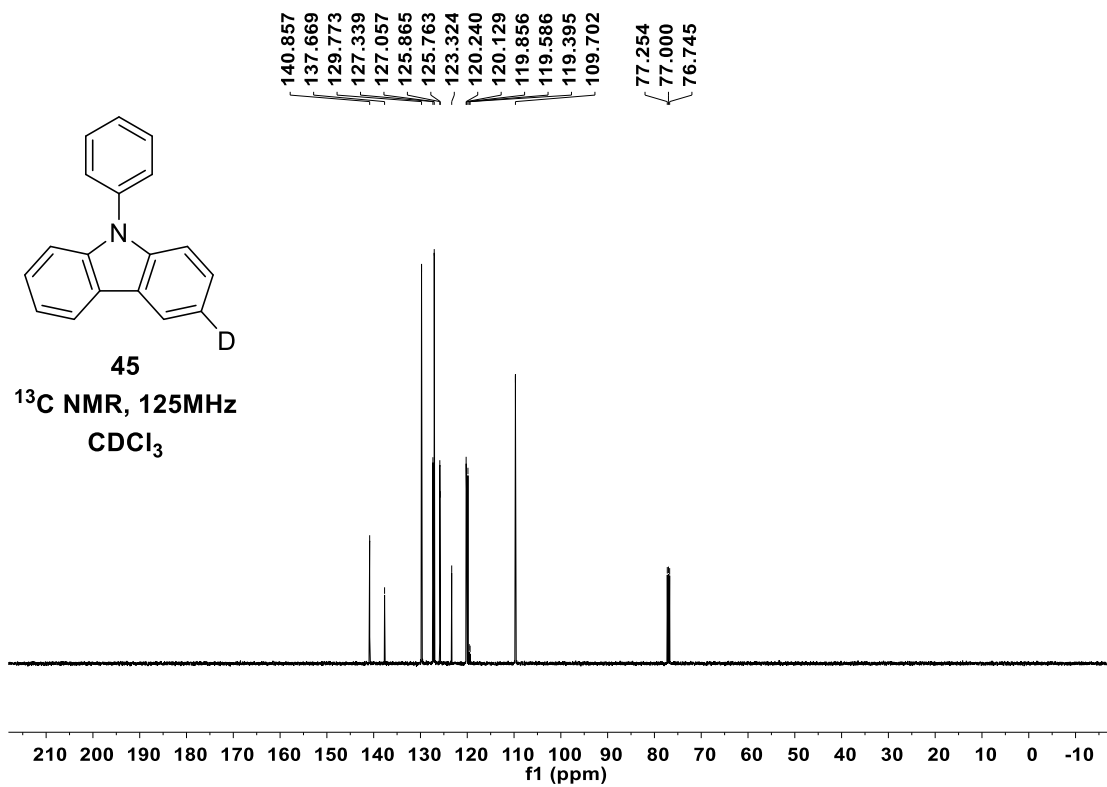

7.237  
7.228  
7.212  
7.205  
6.933  
6.919  
6.904  
6.841  
6.839  
6.835  
6.827  
6.824  
6.822  
5.759  
5.723  
5.705

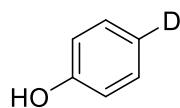

46

<sup>1</sup>H NMR, 500MHz

CDCl<sub>3</sub>

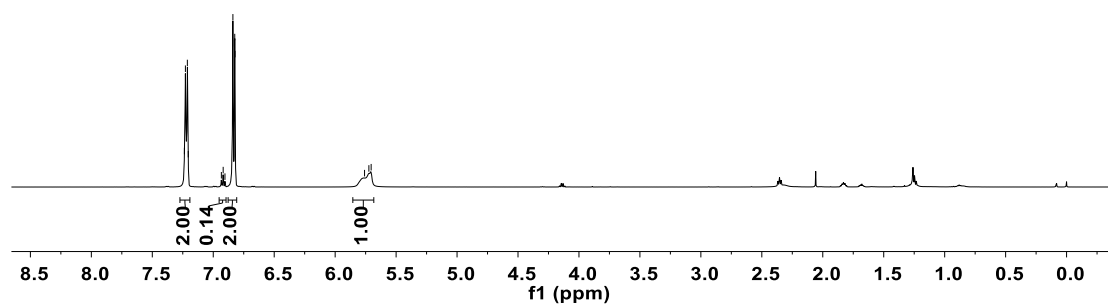

155.292  
129.539  
120.788  
120.716  
120.519  
120.322  
115.318  
77.253  
77.000  
76.745

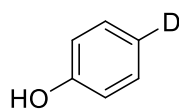

46

<sup>13</sup>C NMR, 125MHz

CDCl<sub>3</sub>

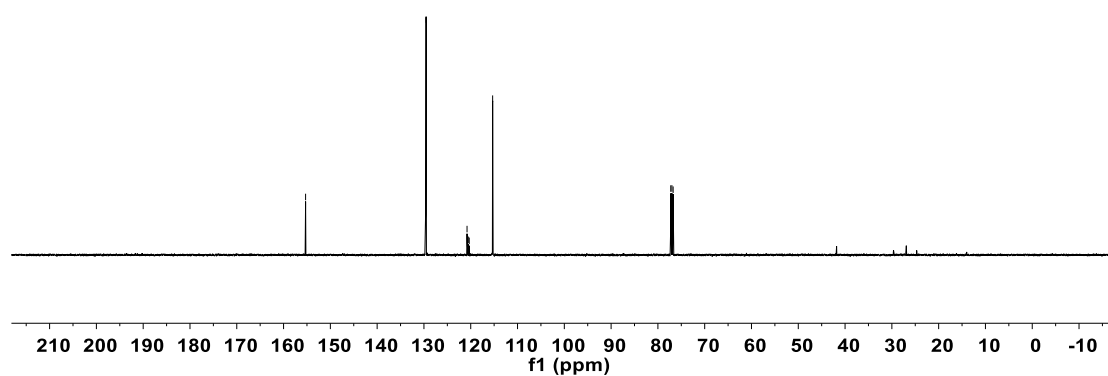

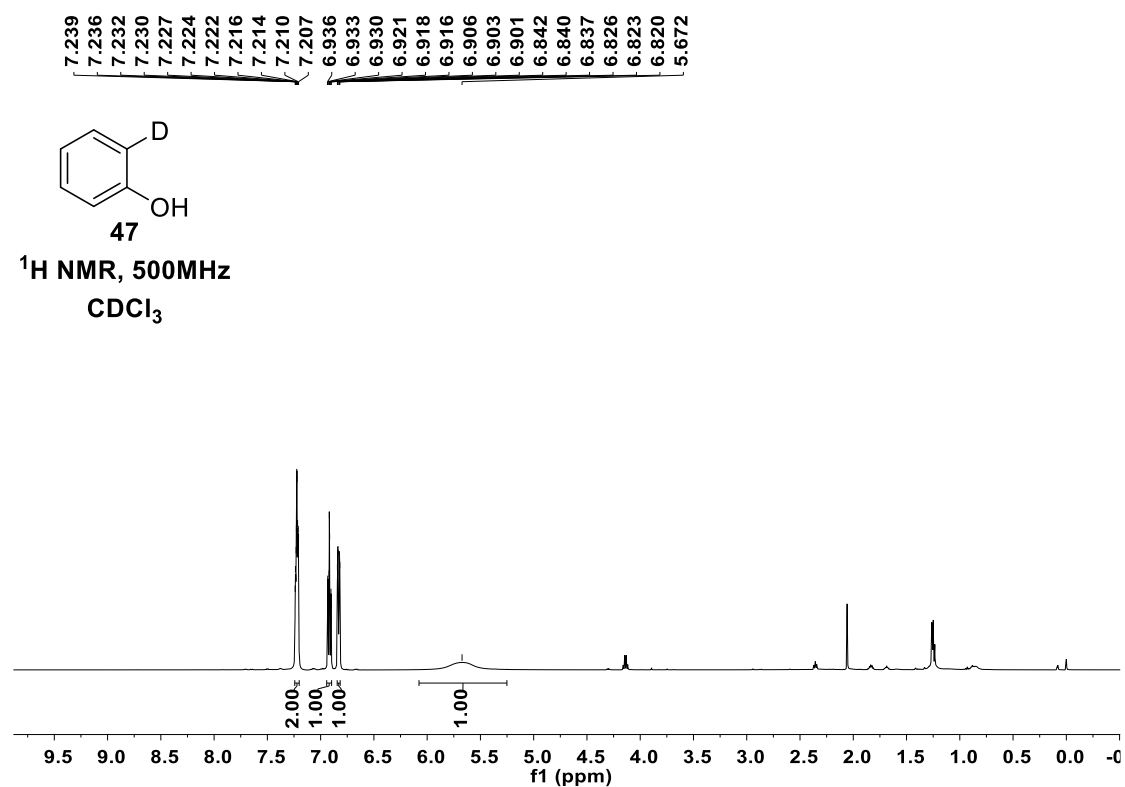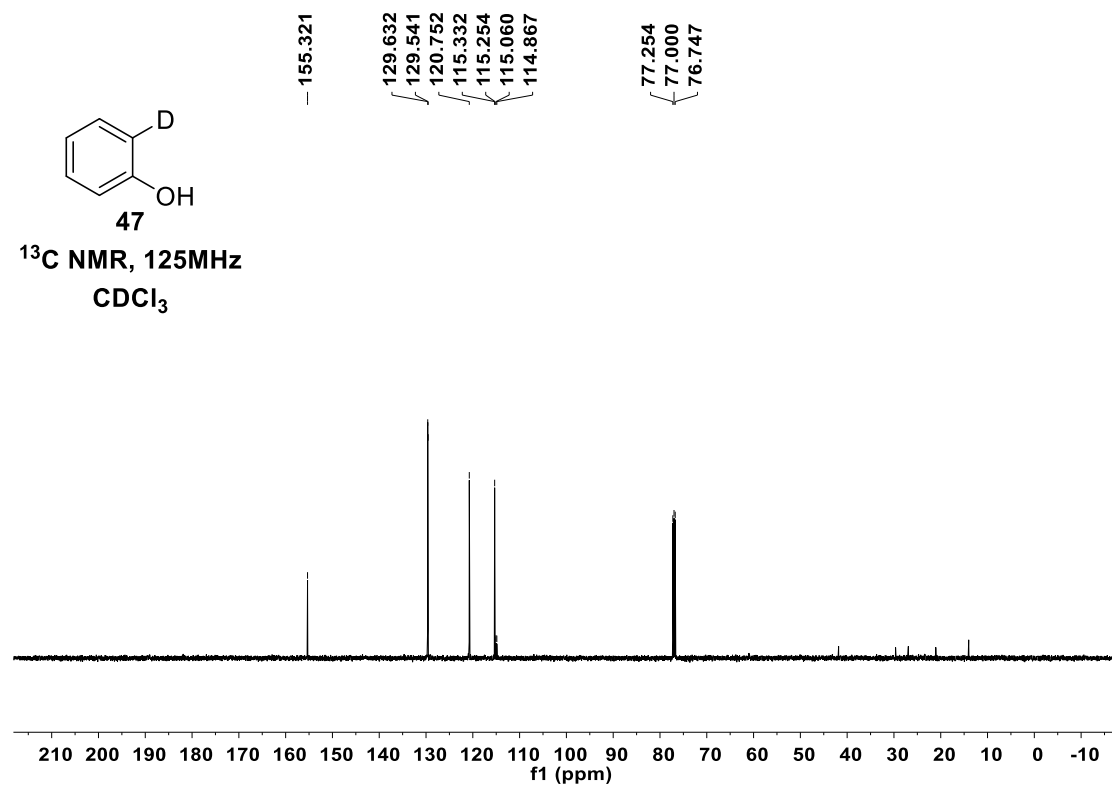

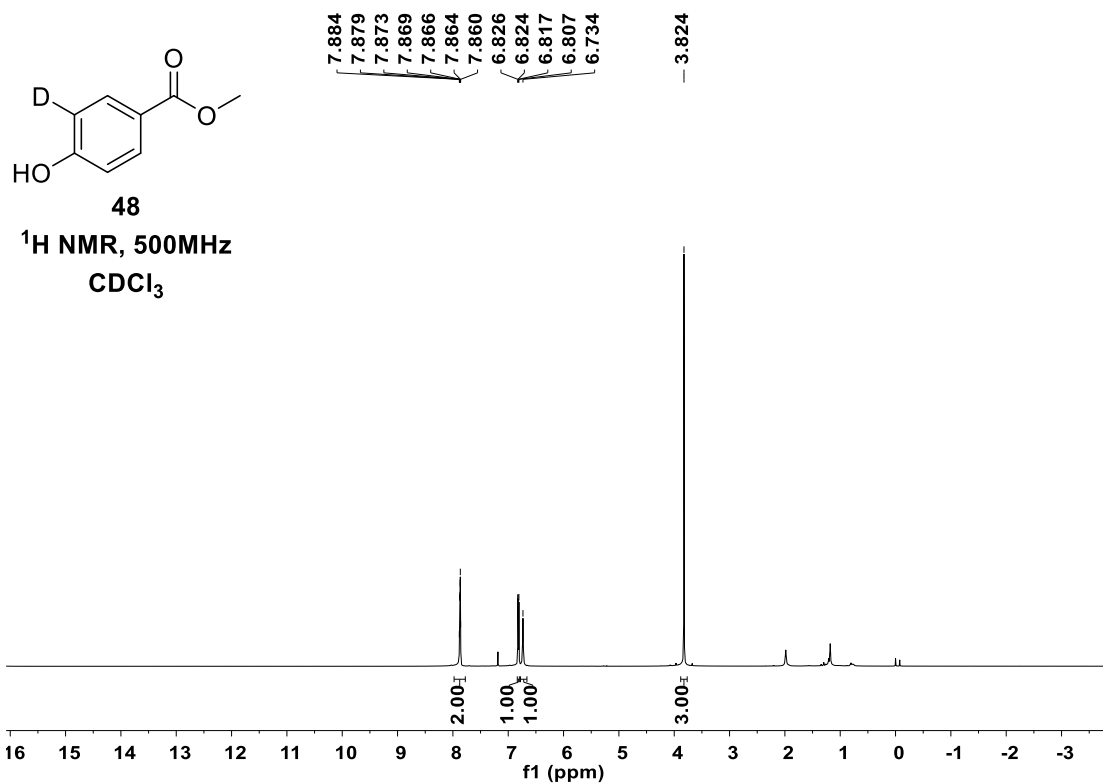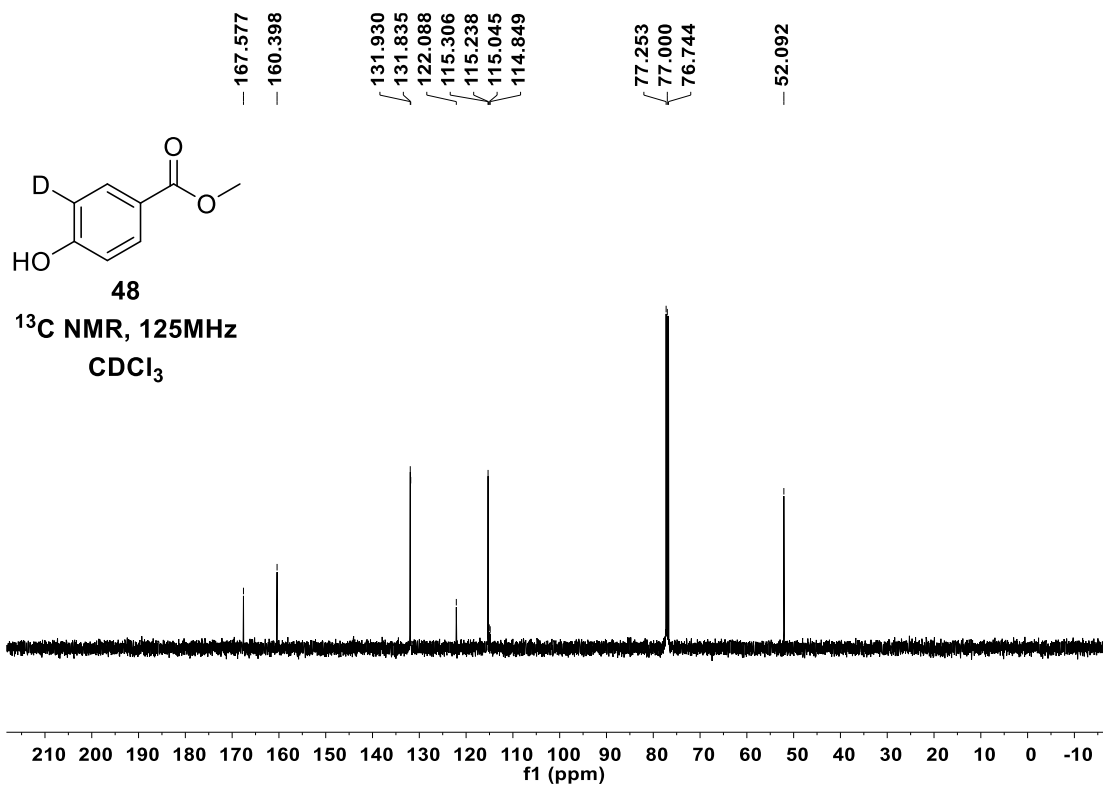

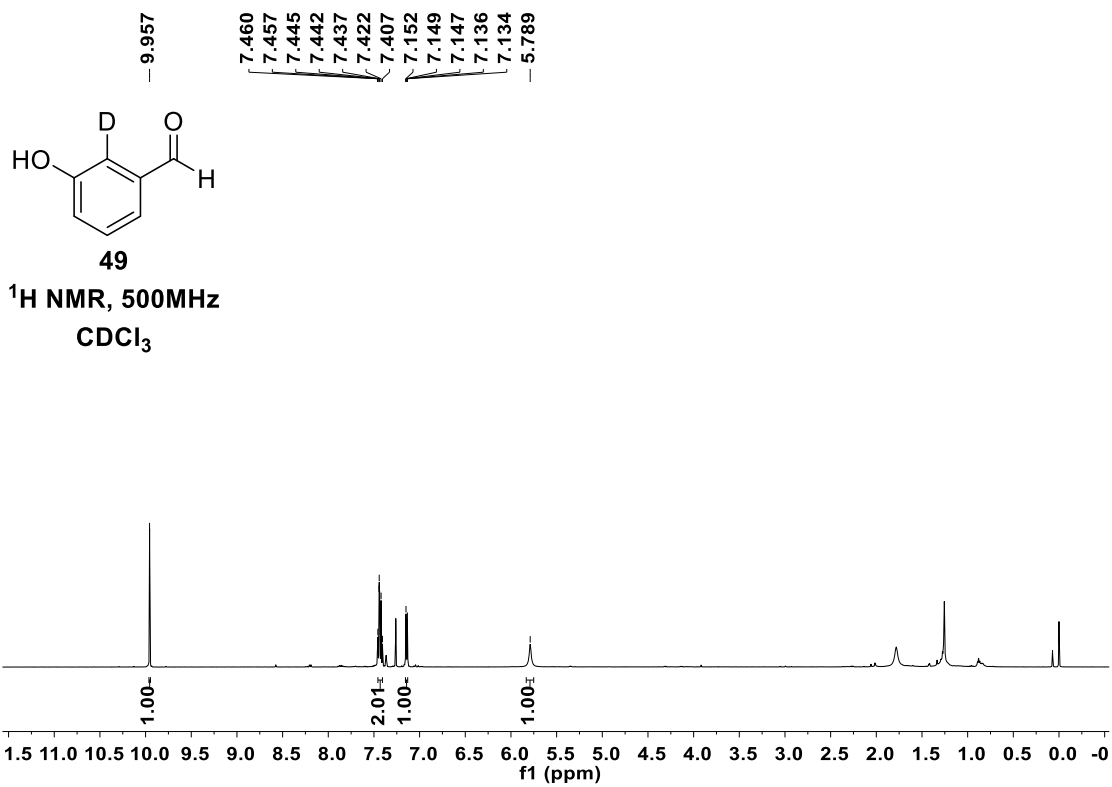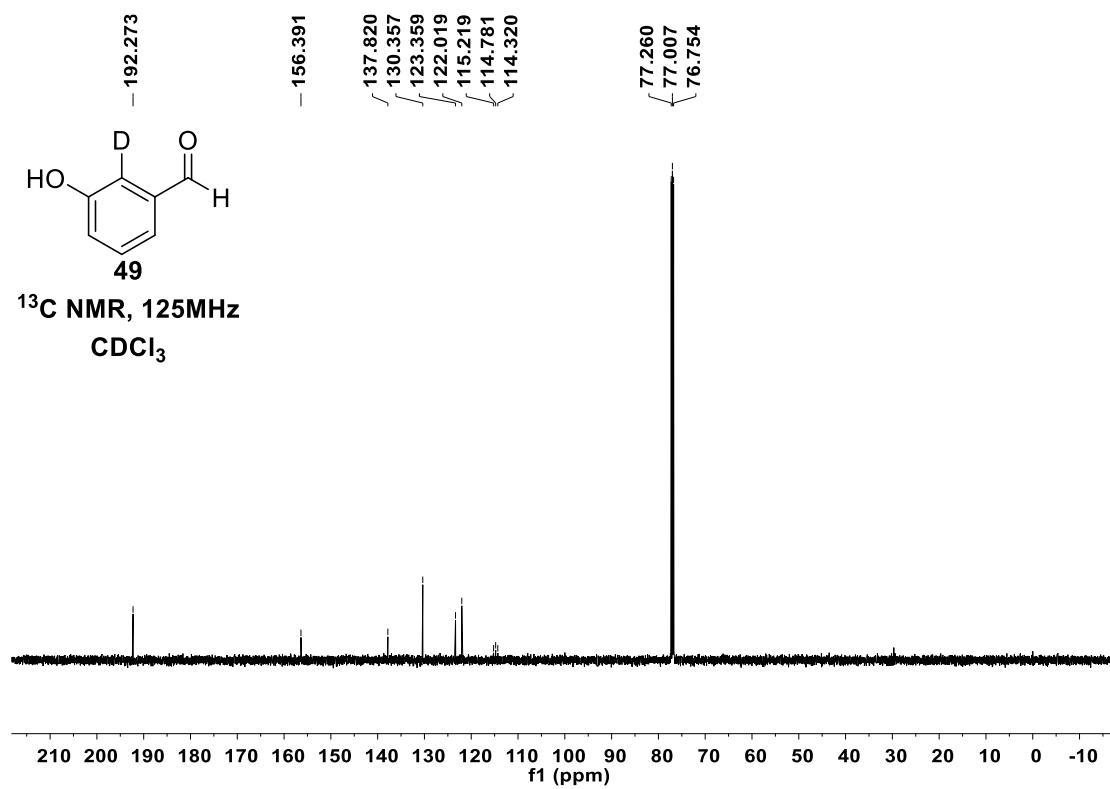

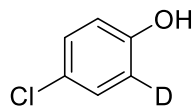

50

$^1\text{H}$  NMR, 500MHz

$\text{CDCl}_3$

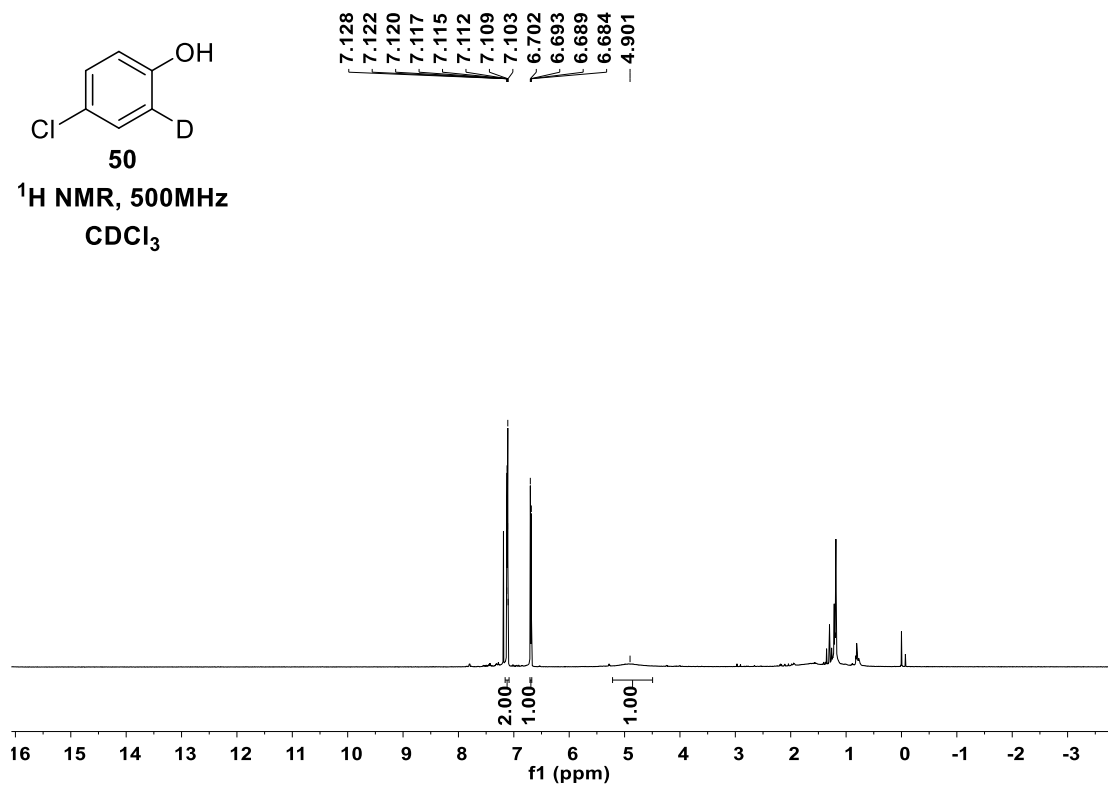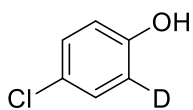

50

$^{13}\text{C}$  NMR, 125MHz

$\text{CDCl}_3$

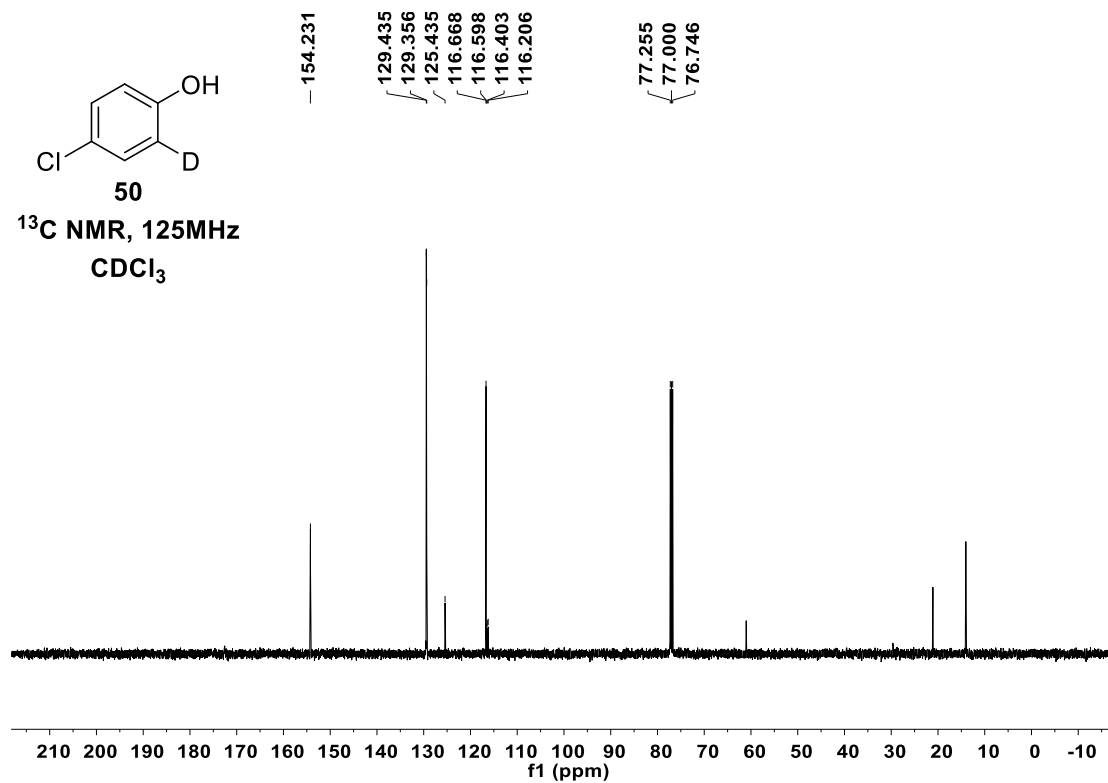

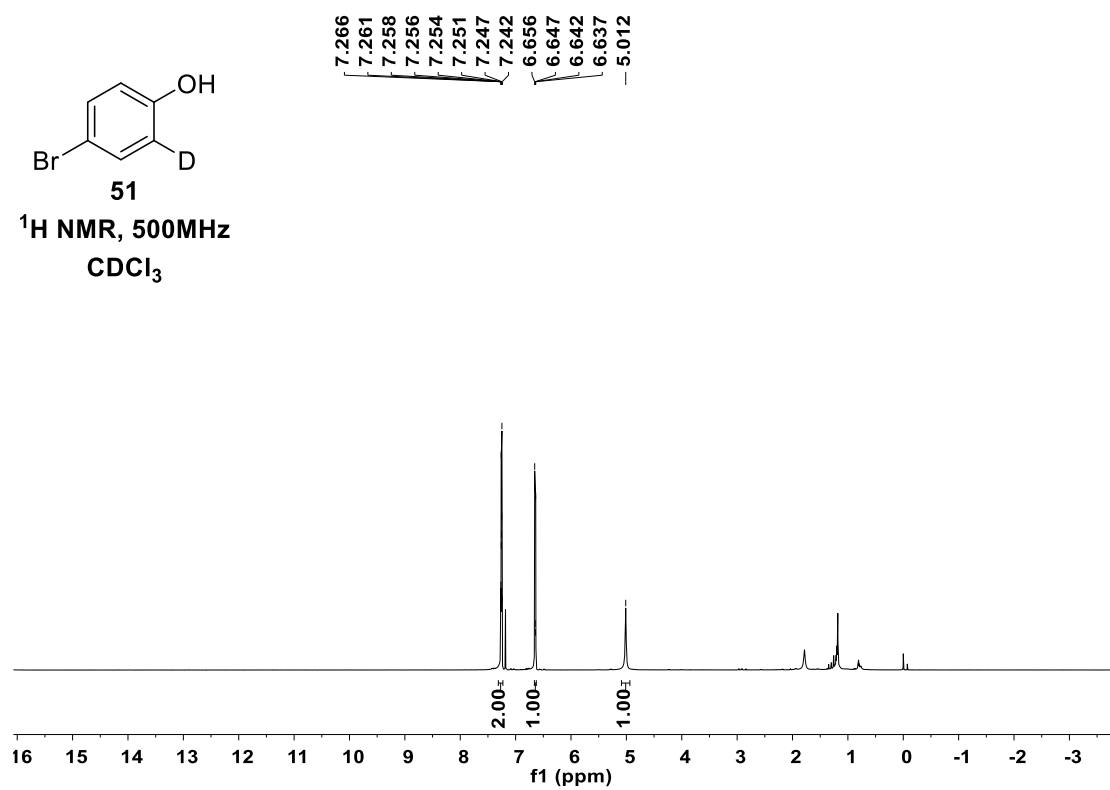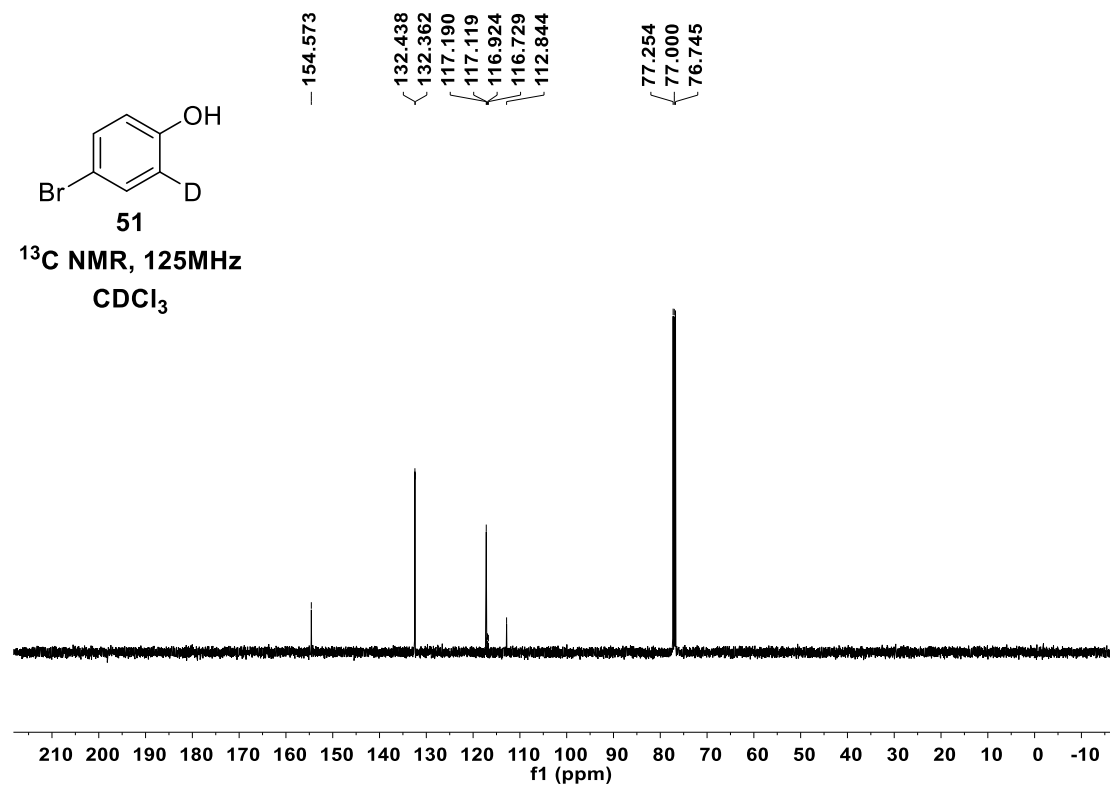

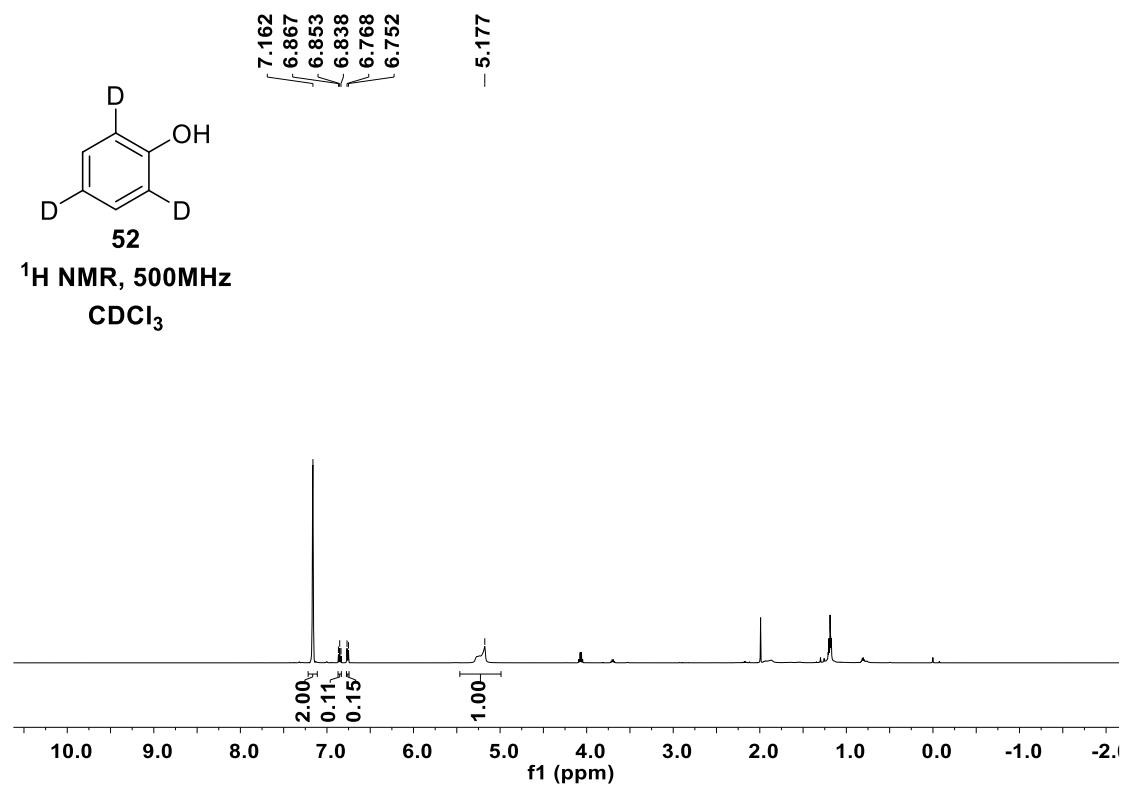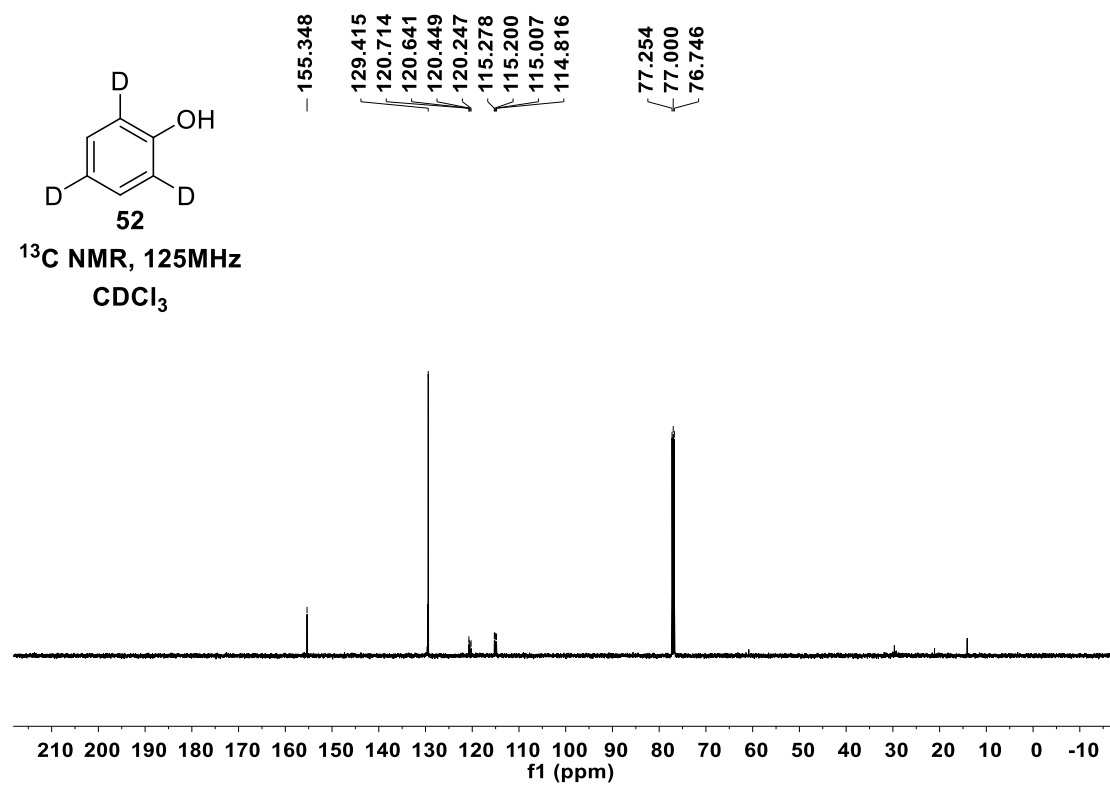

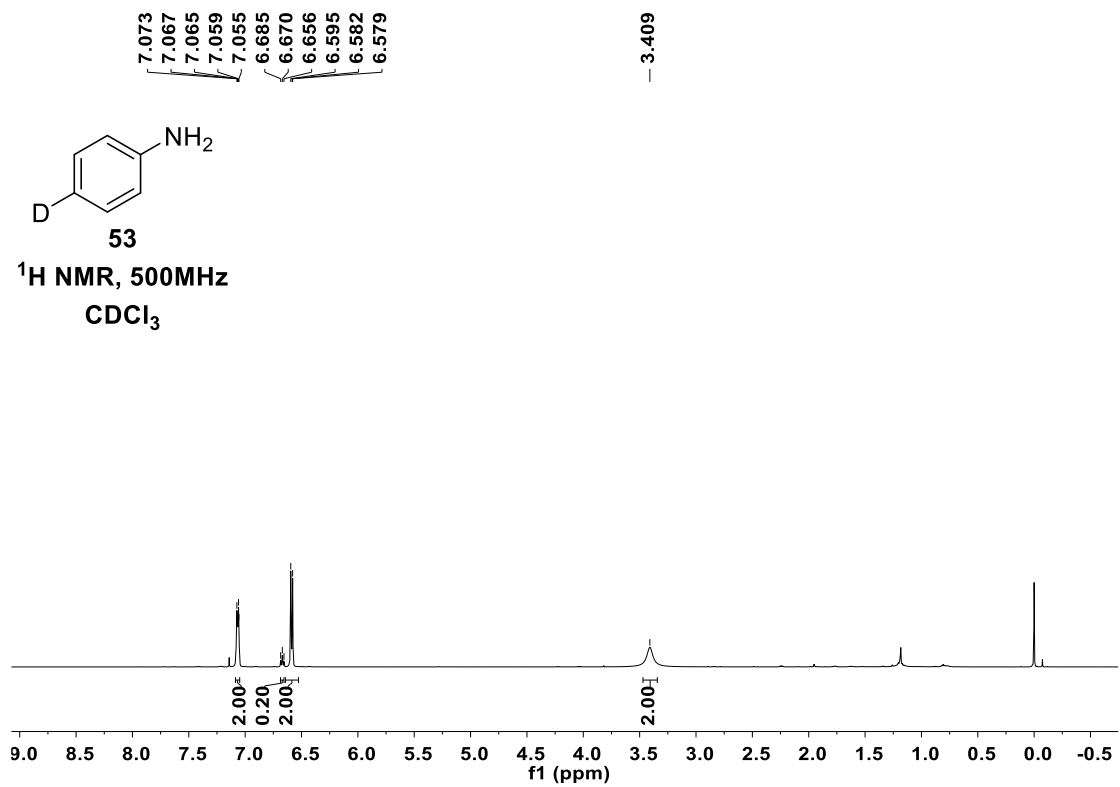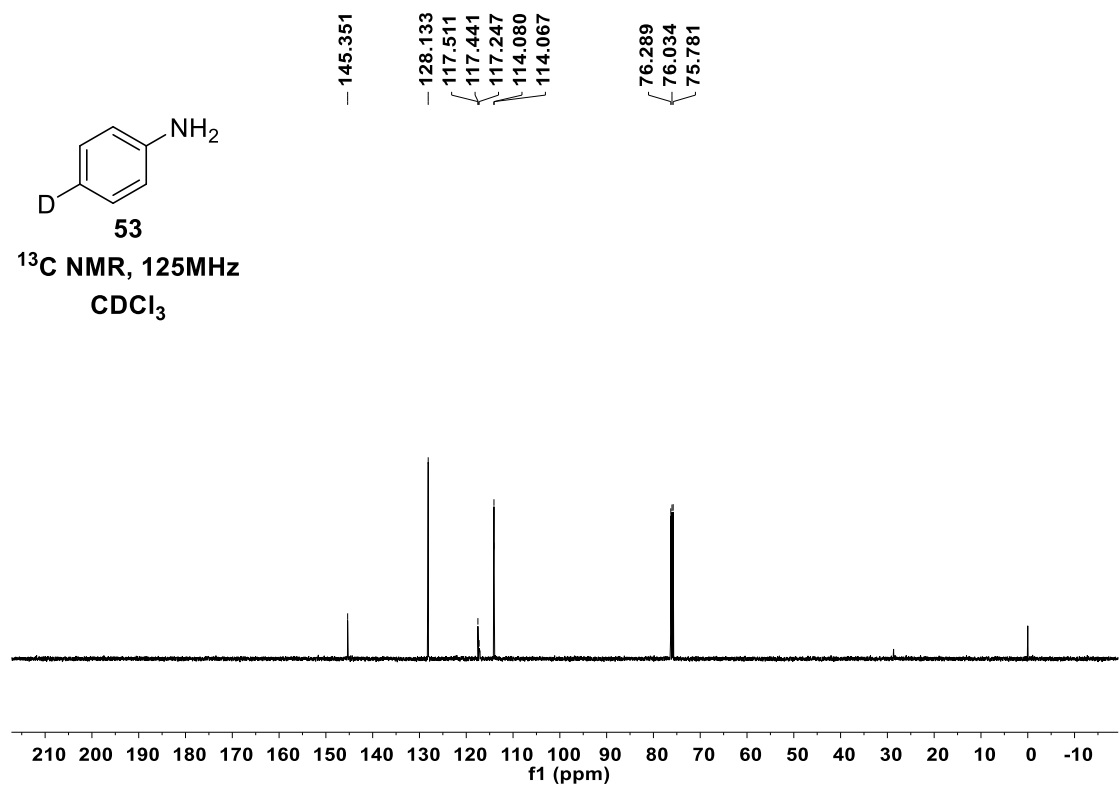

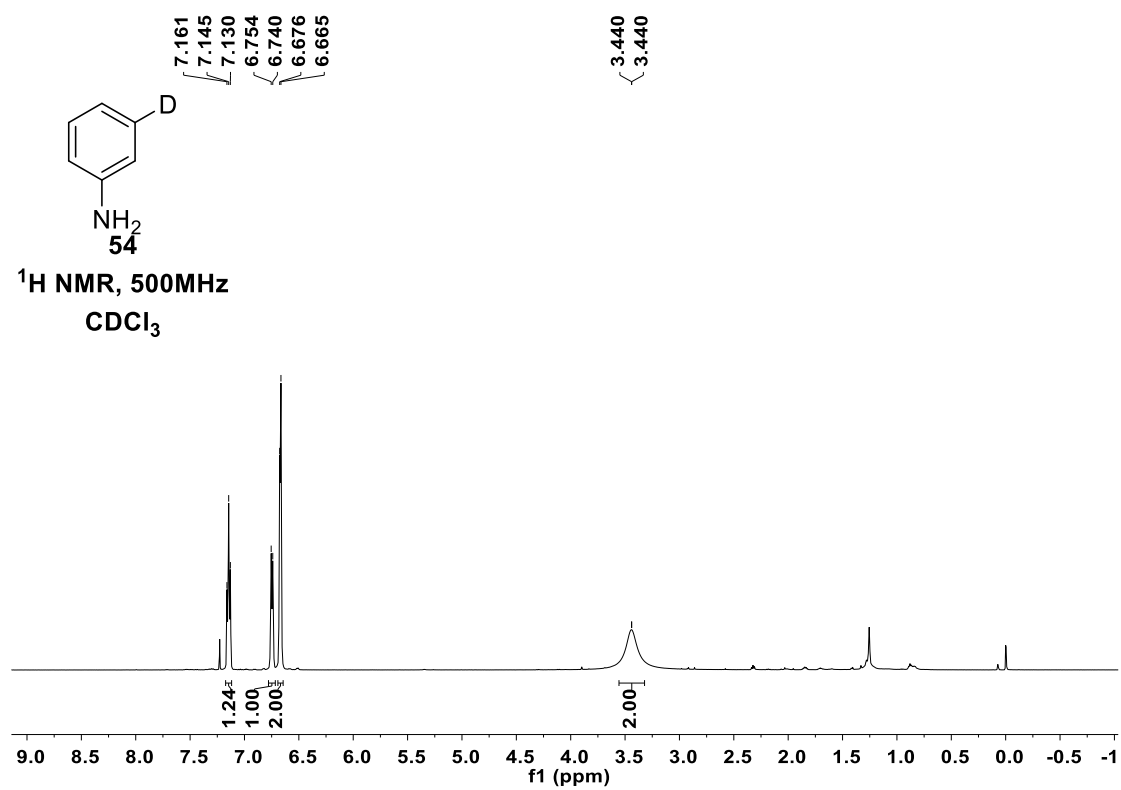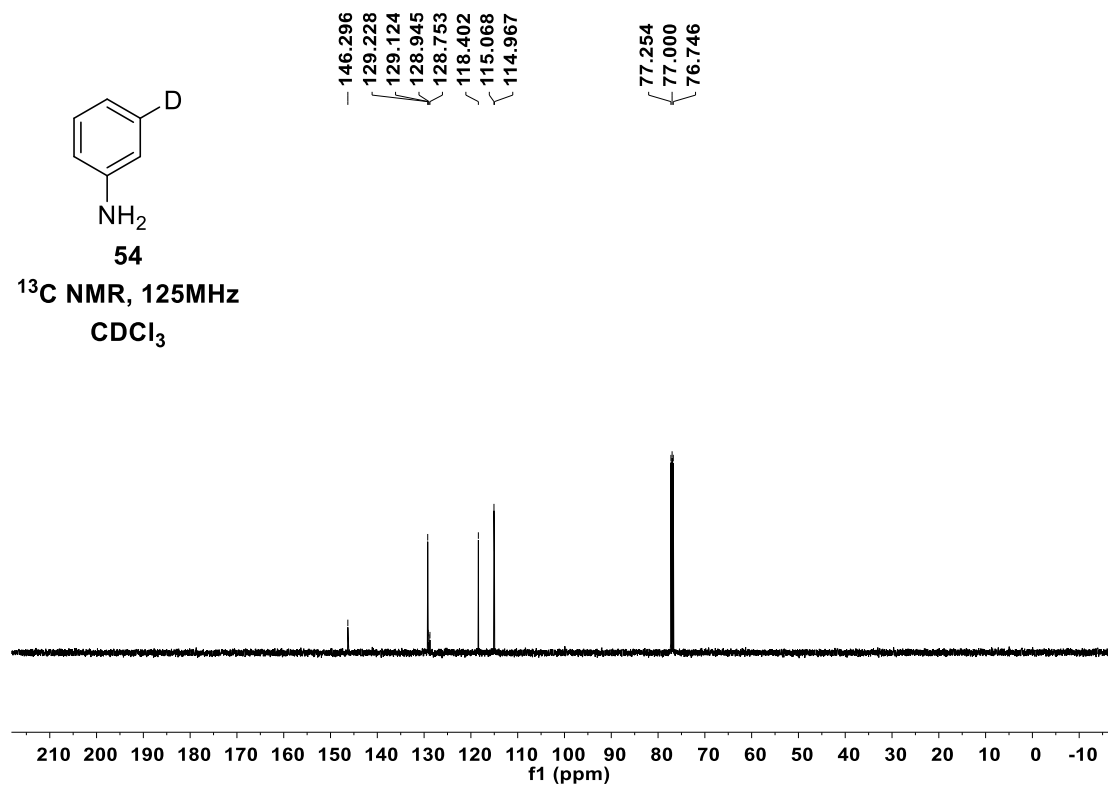

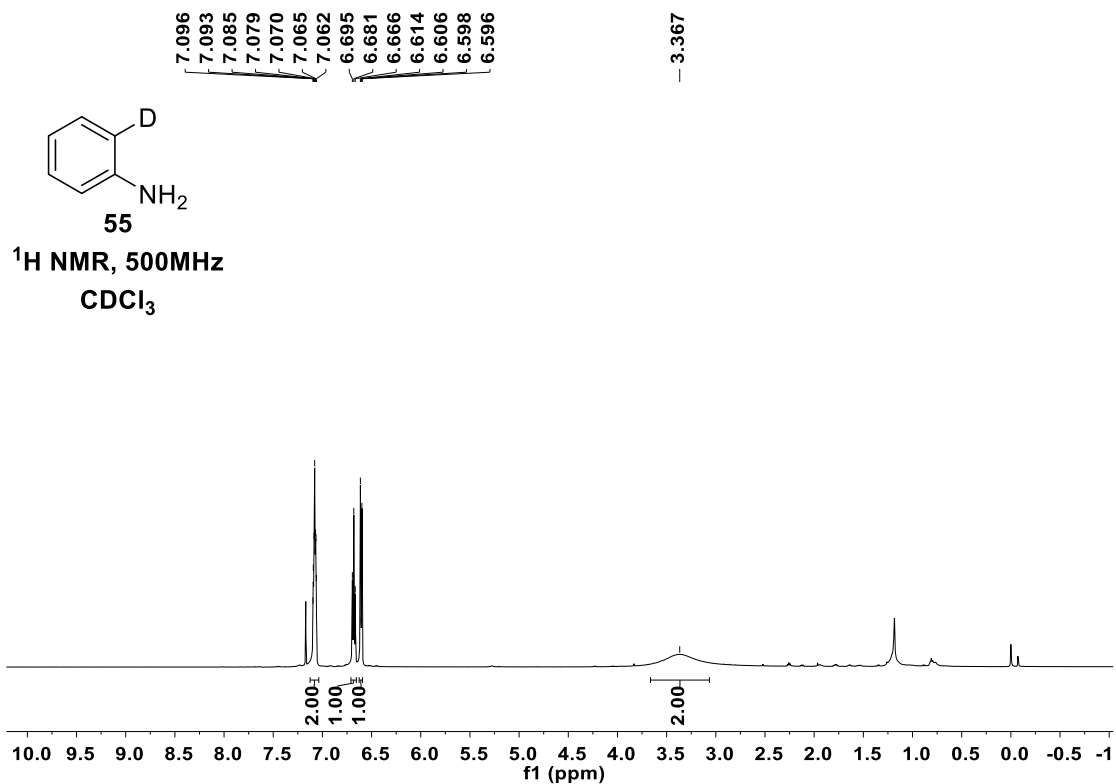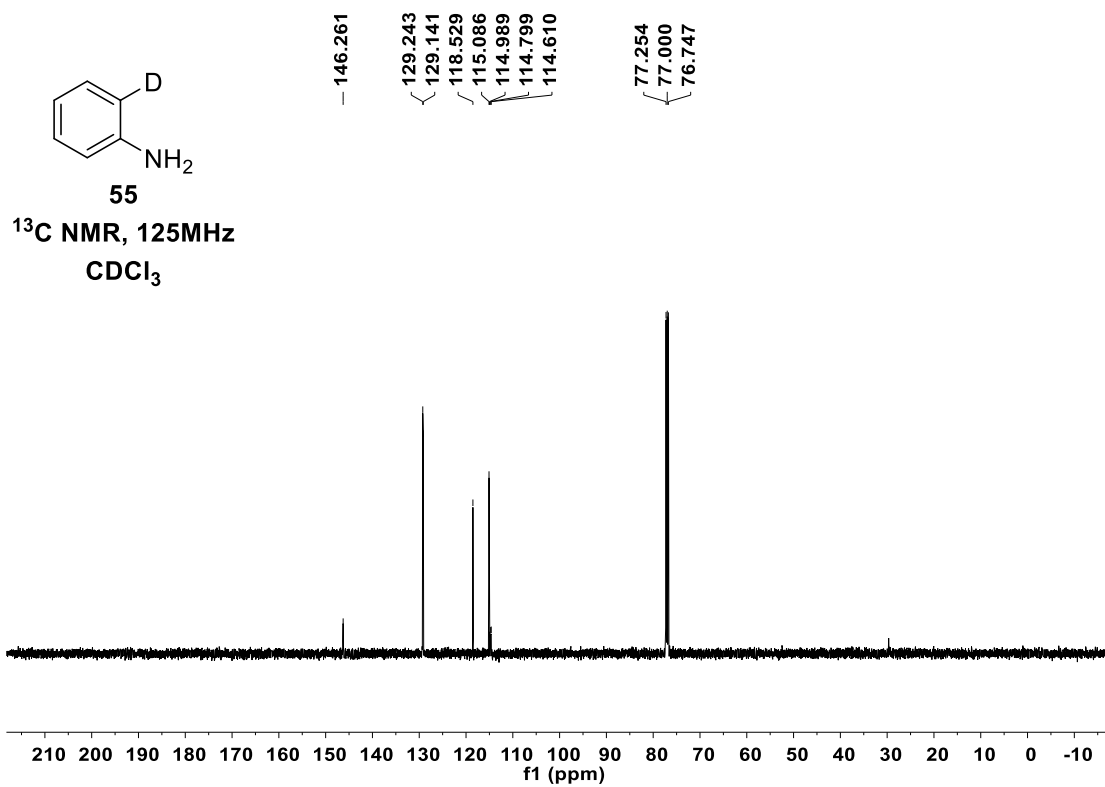

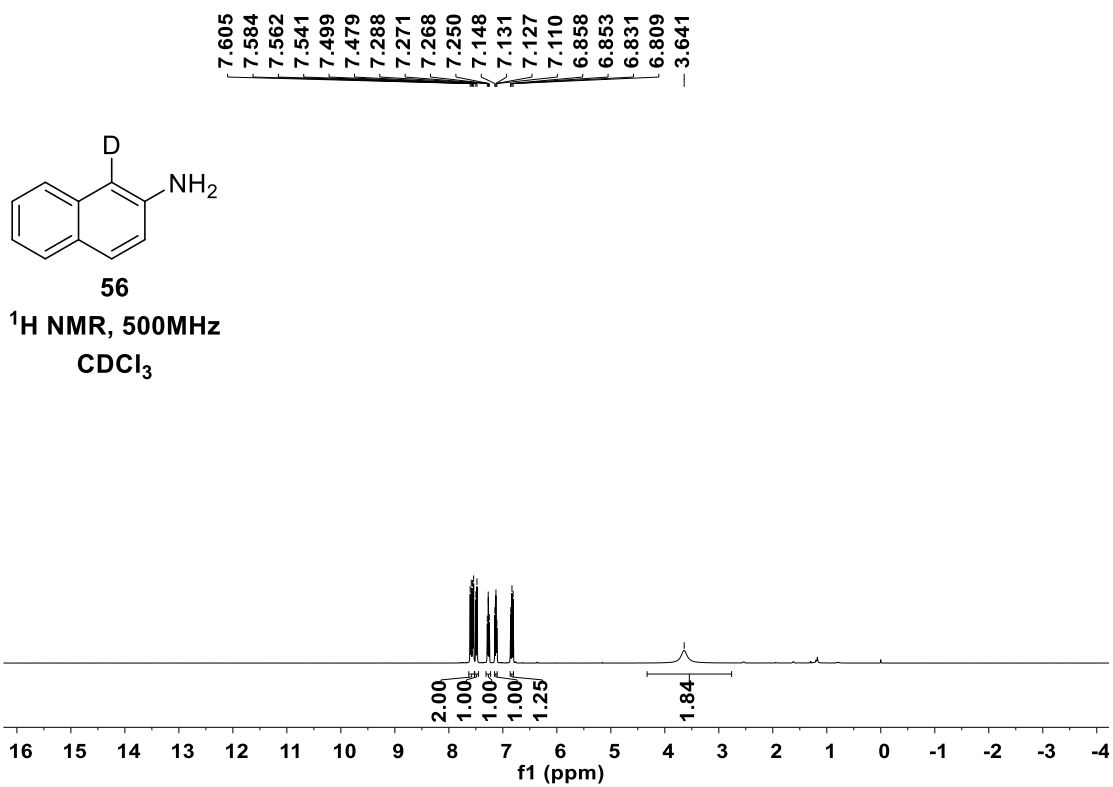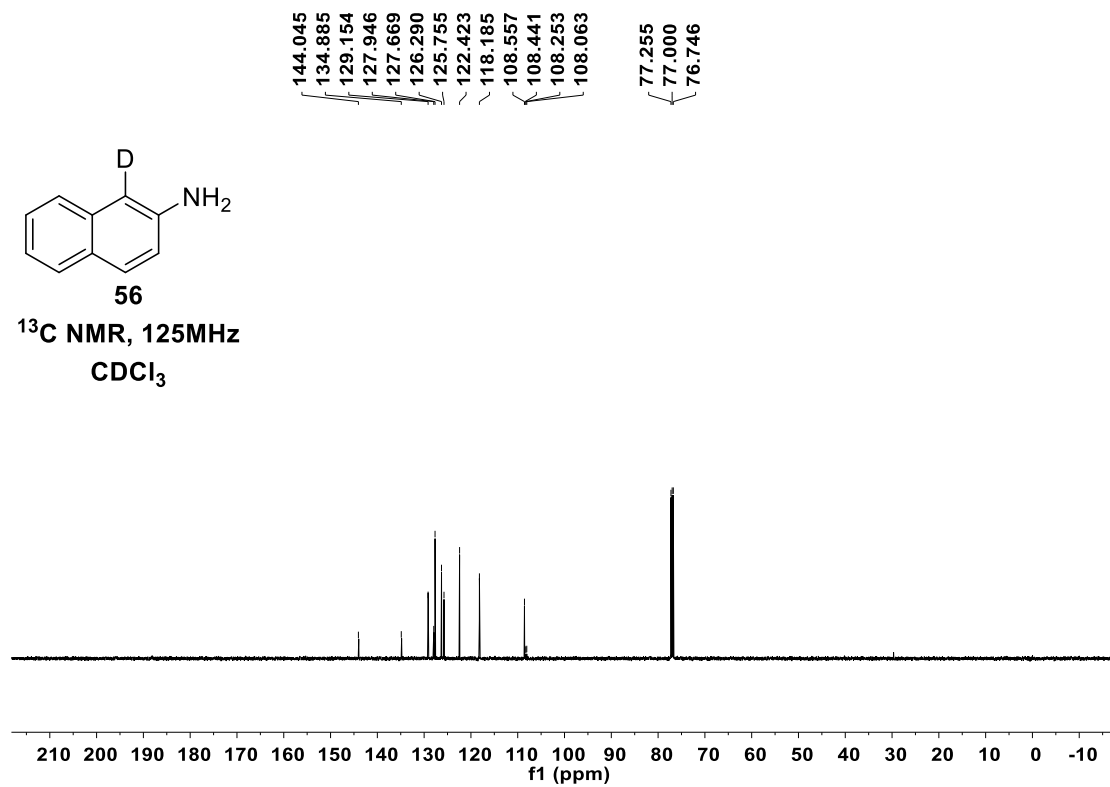

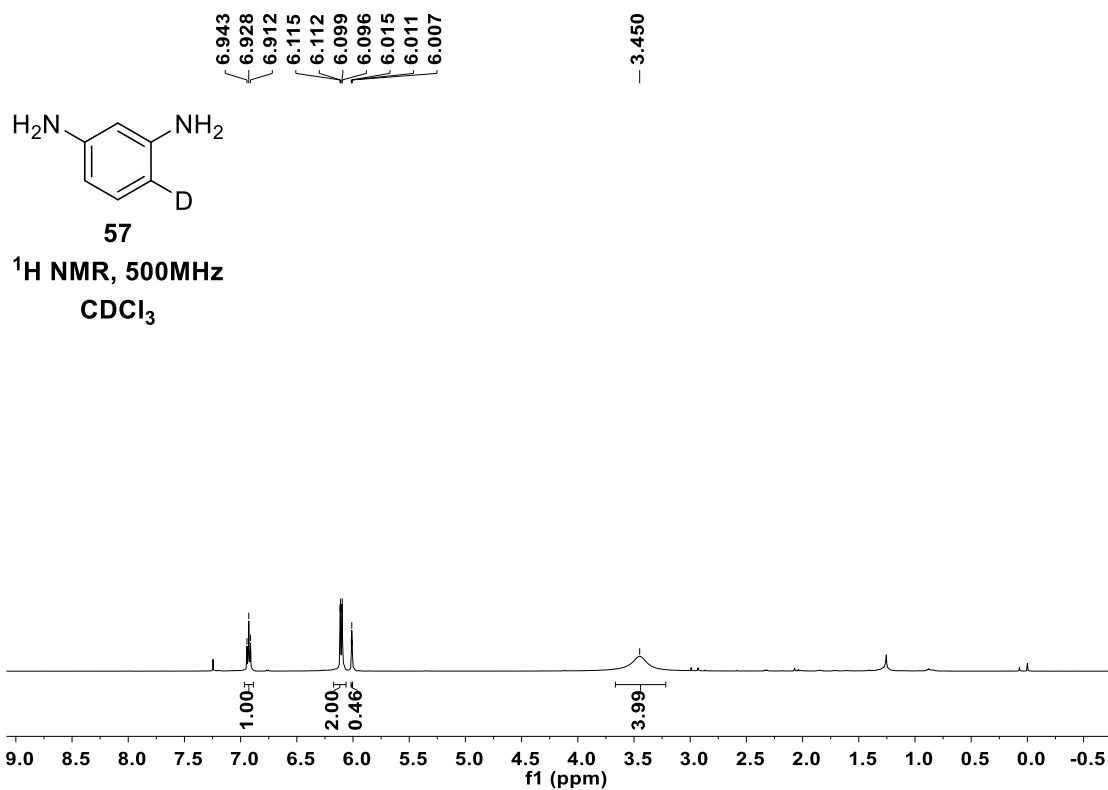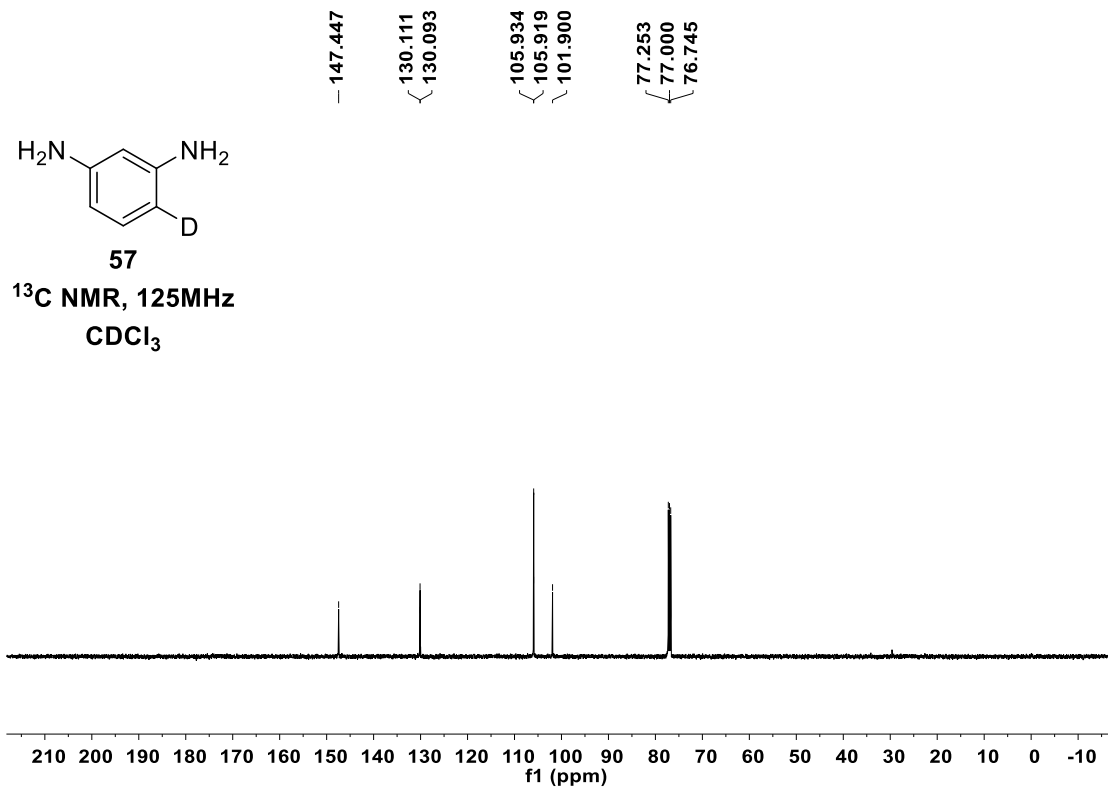

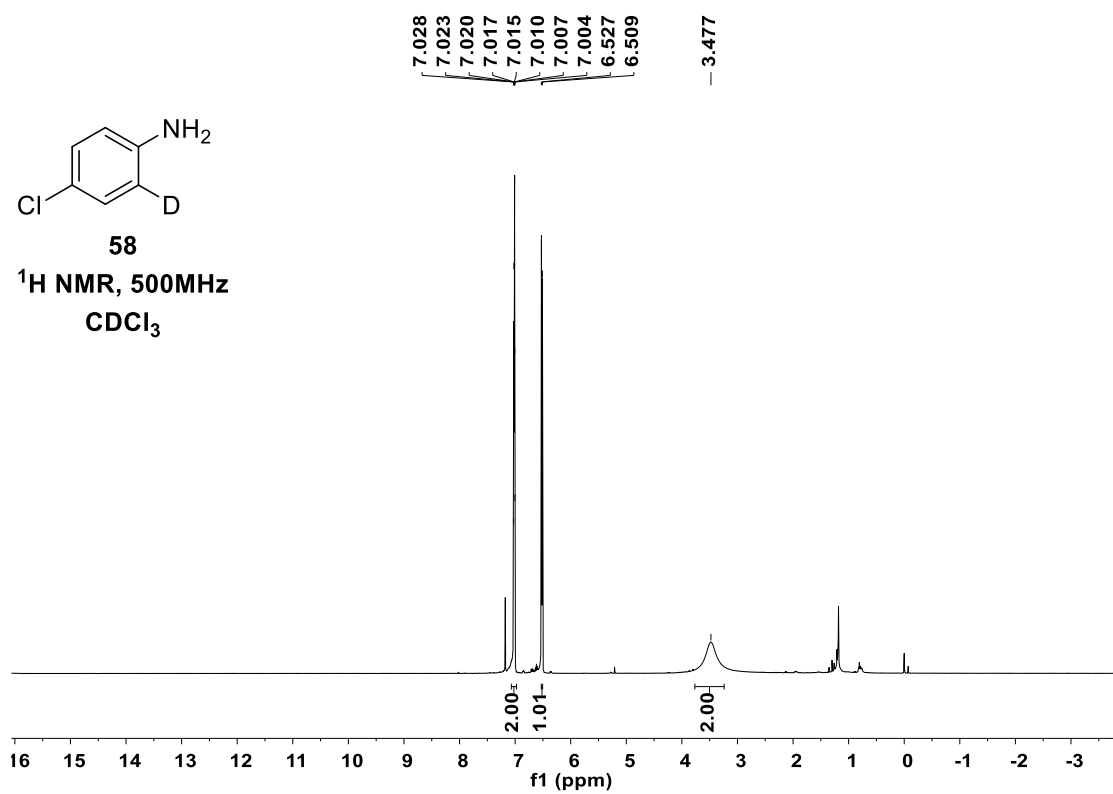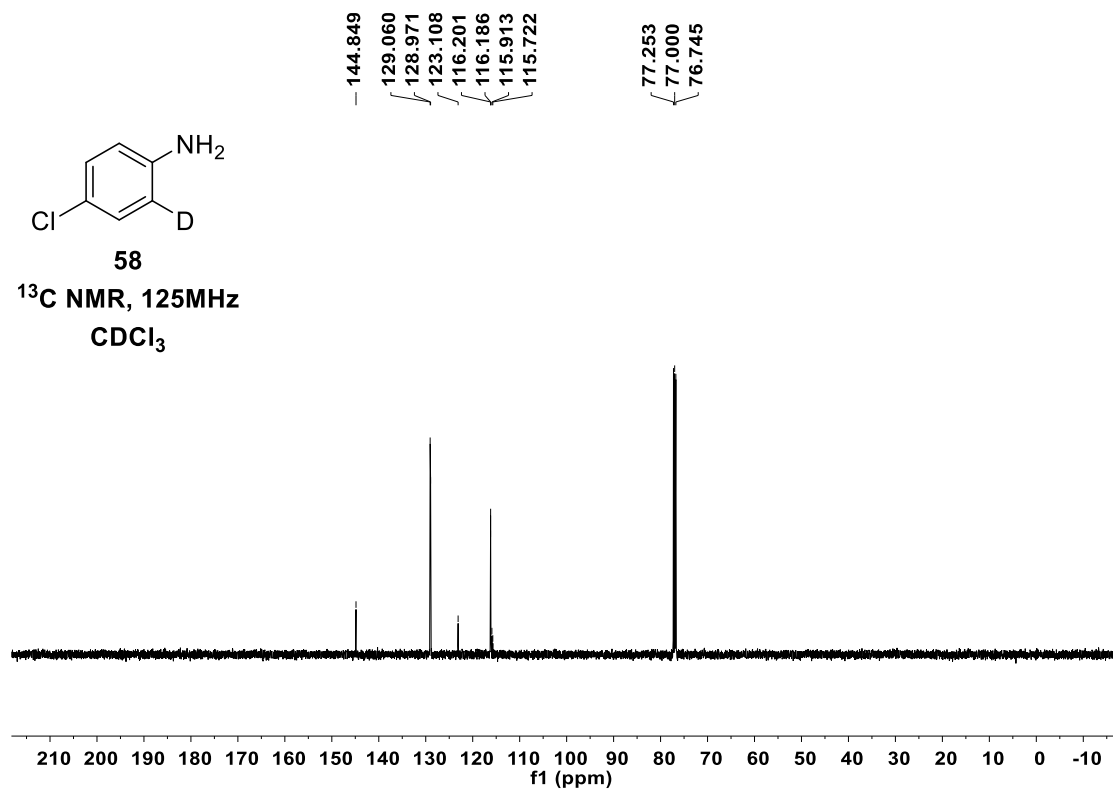

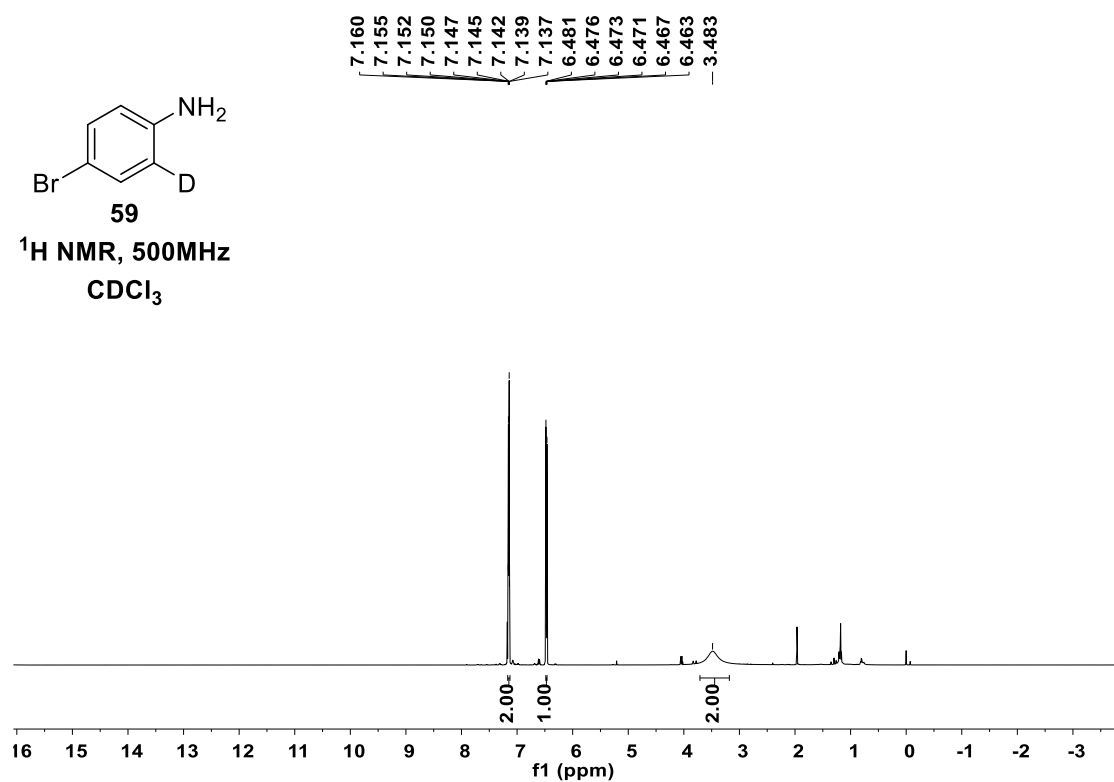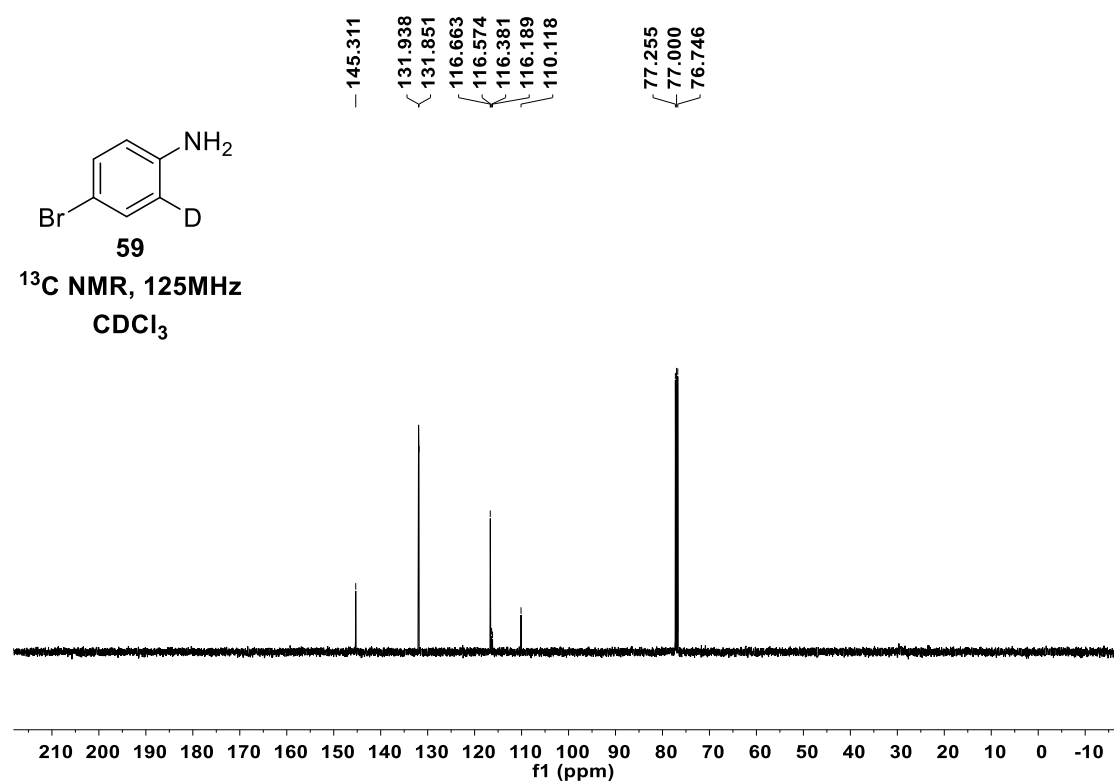

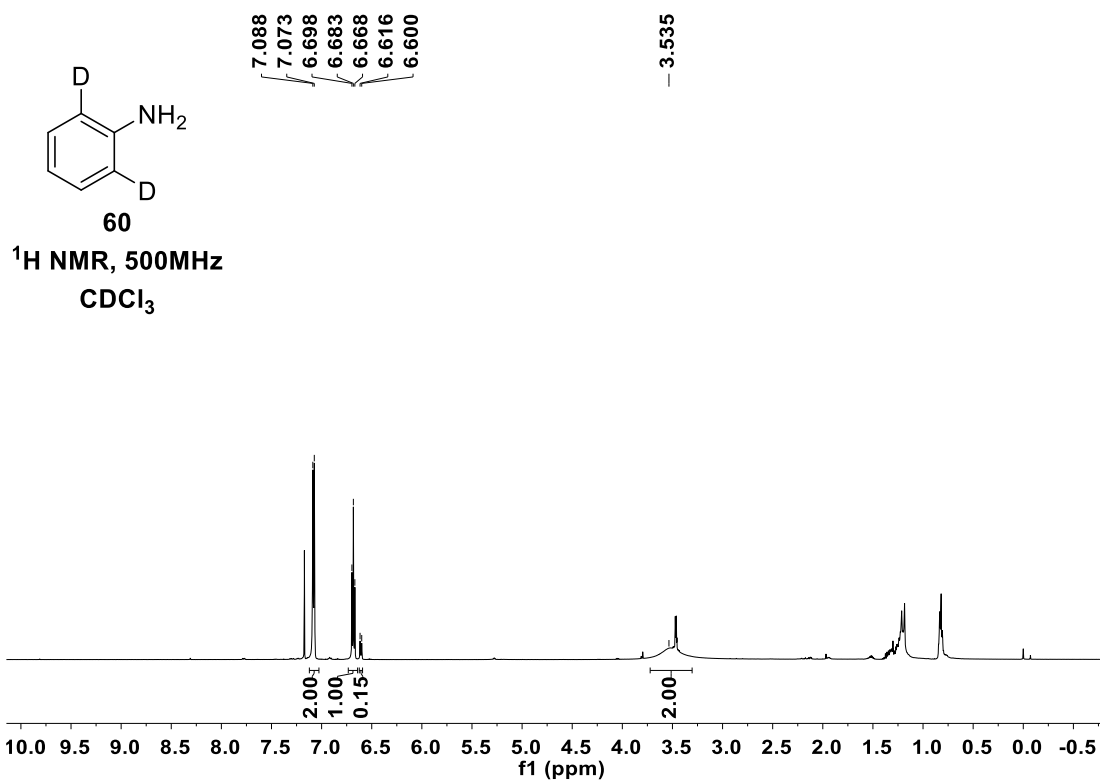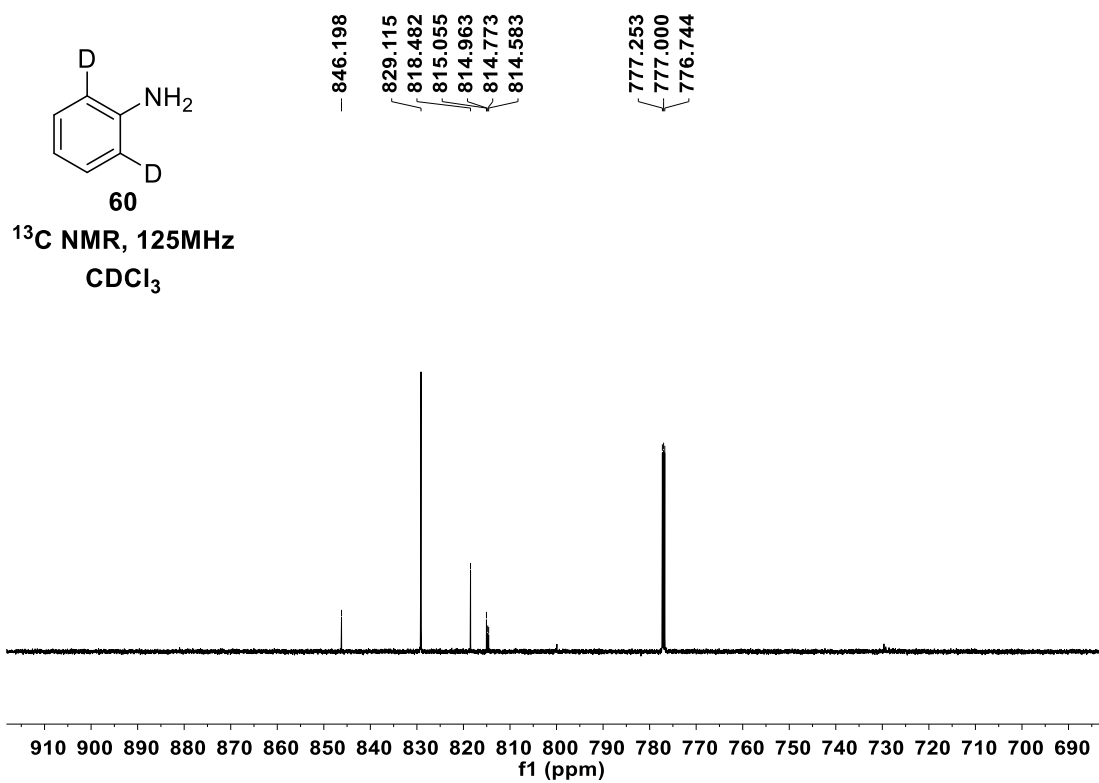

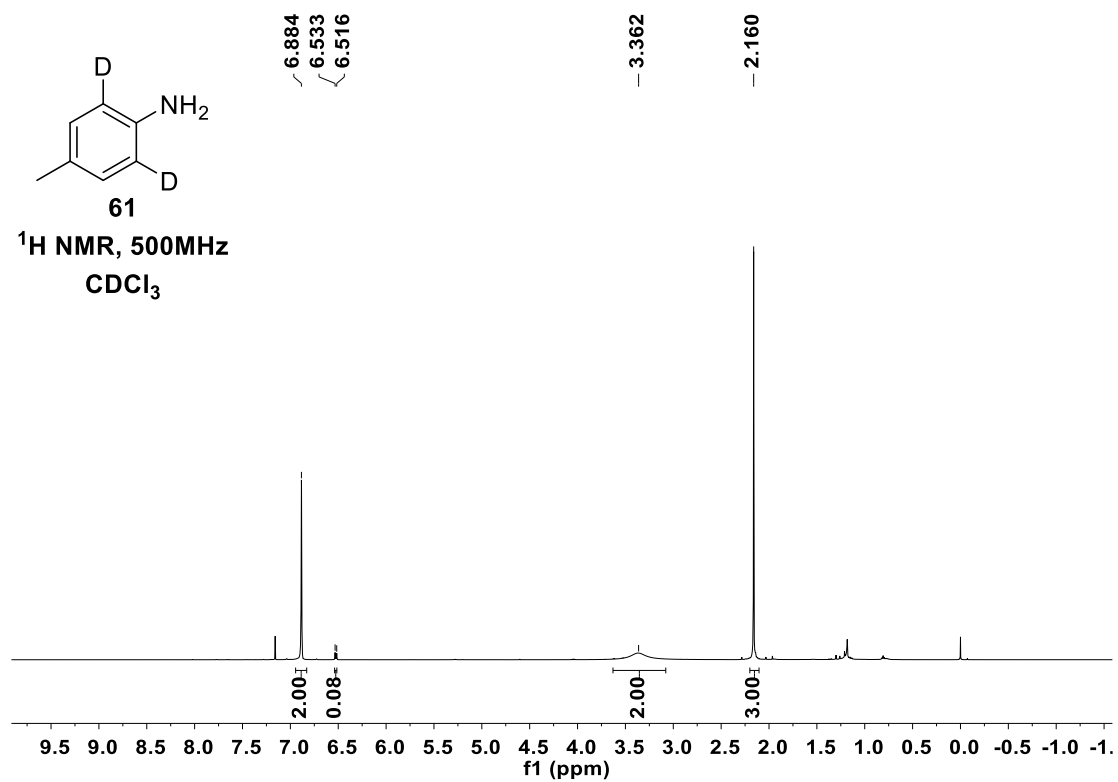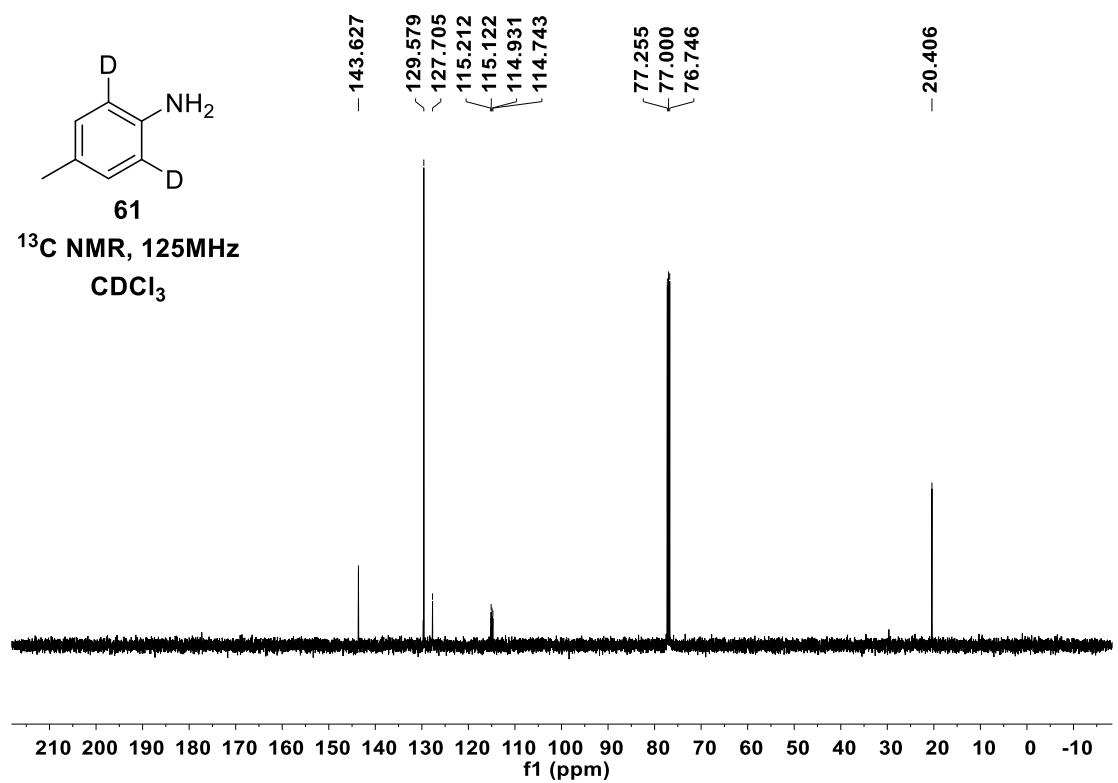

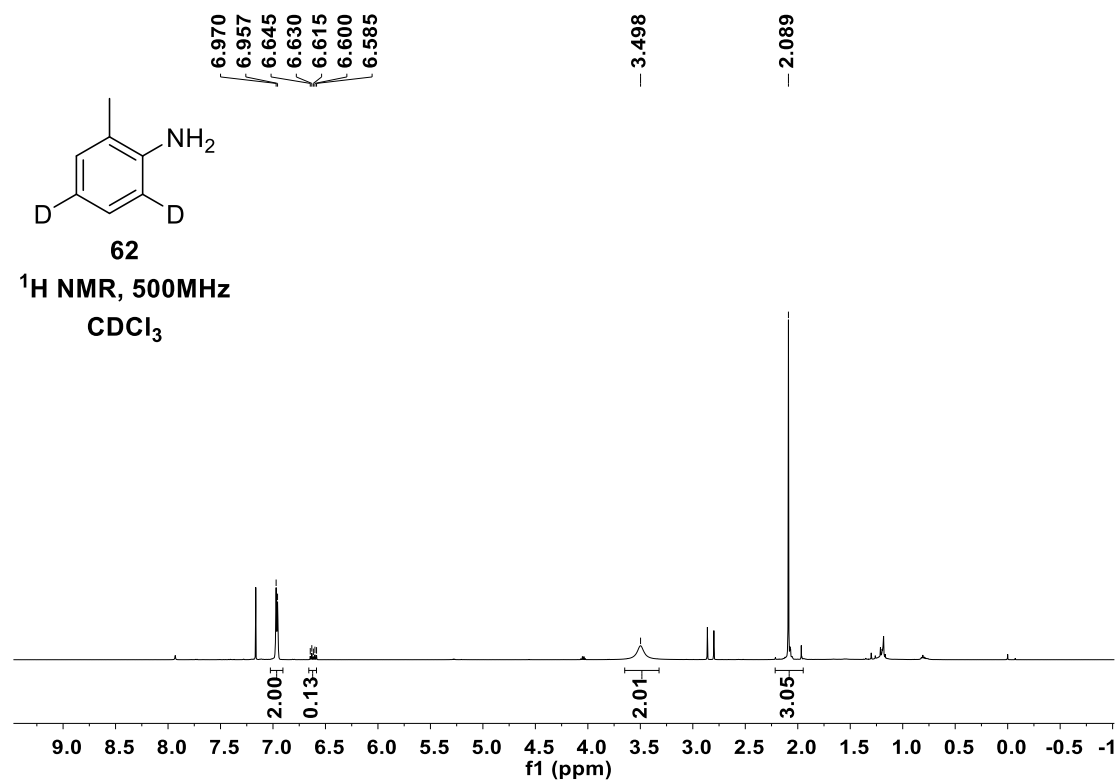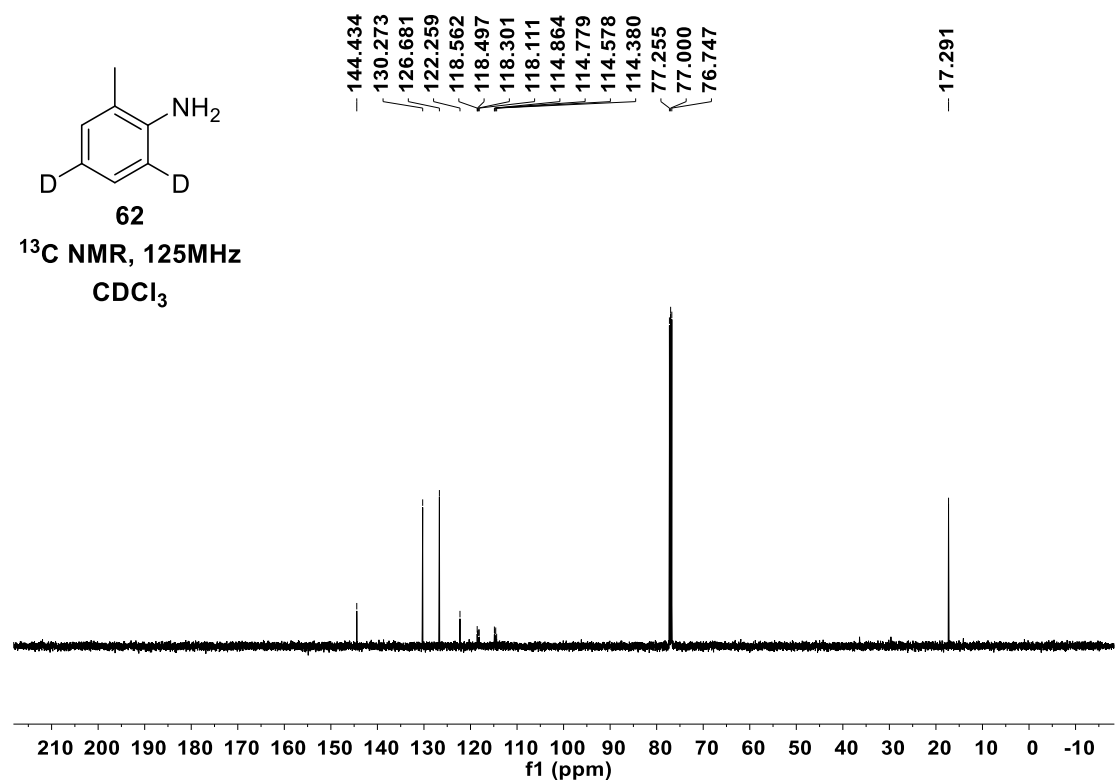

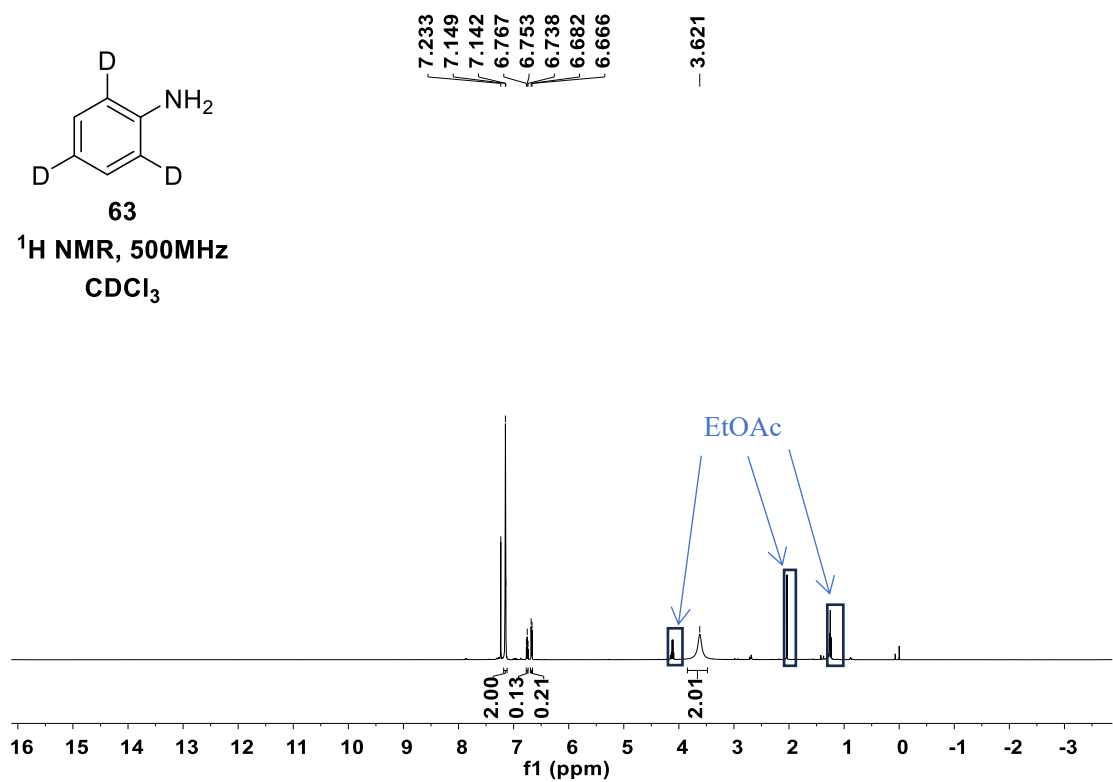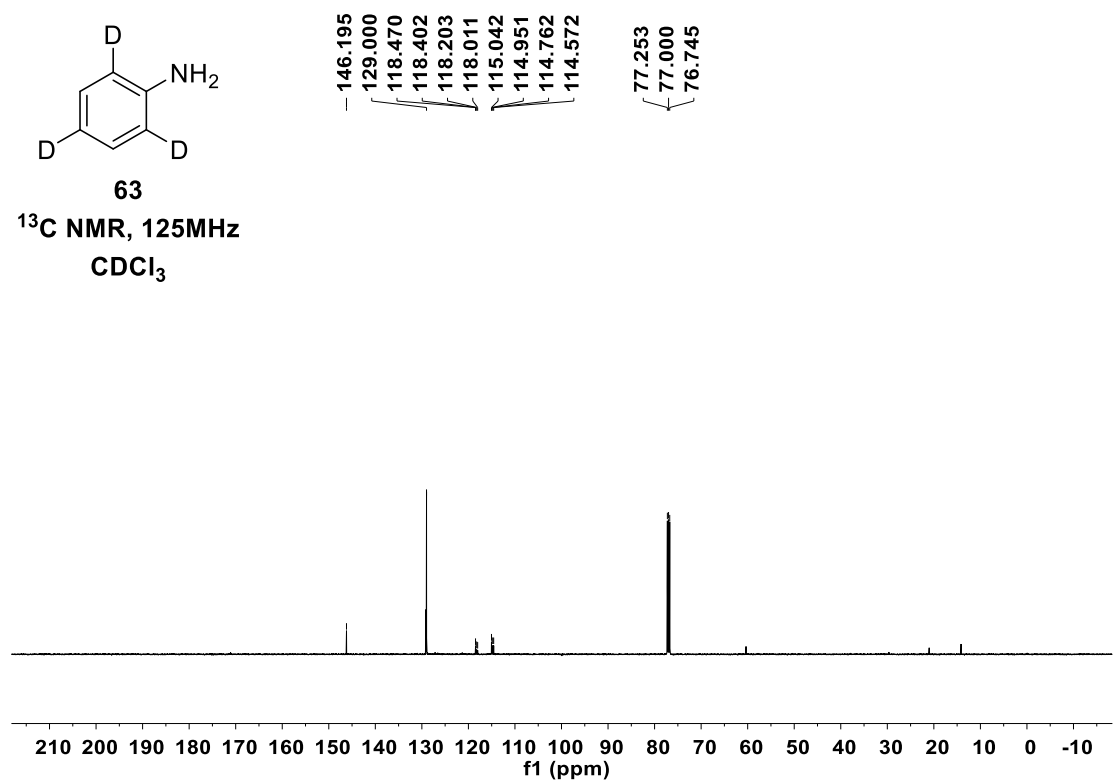

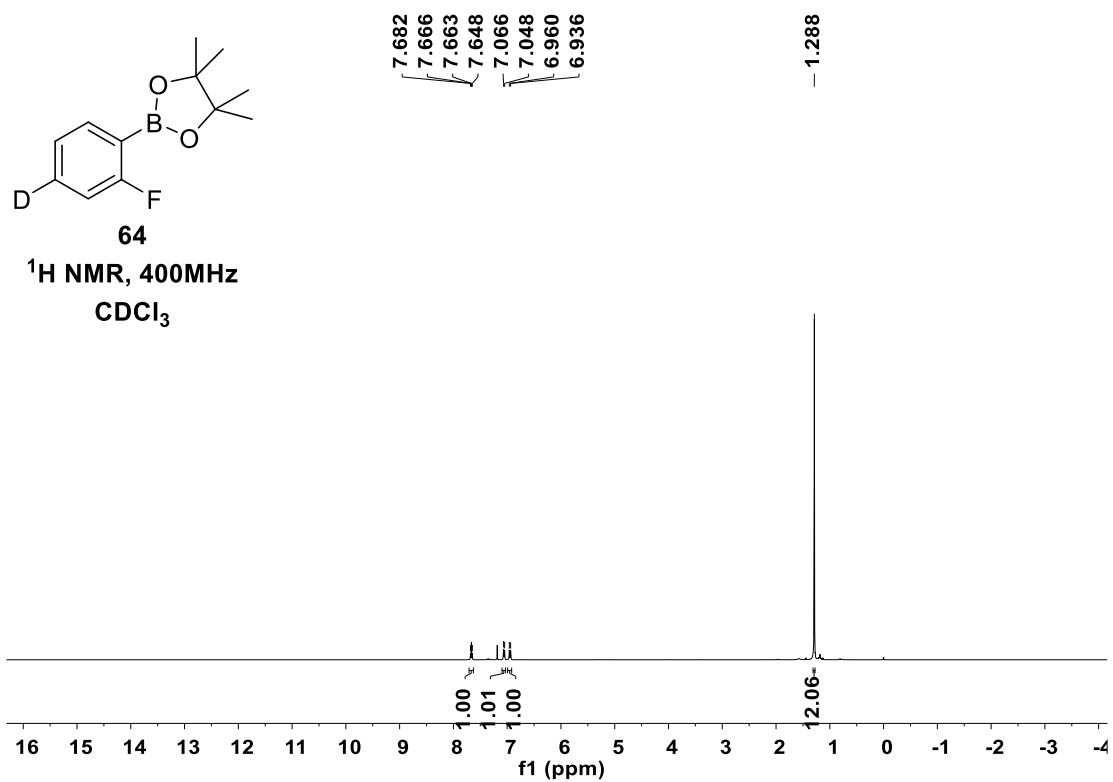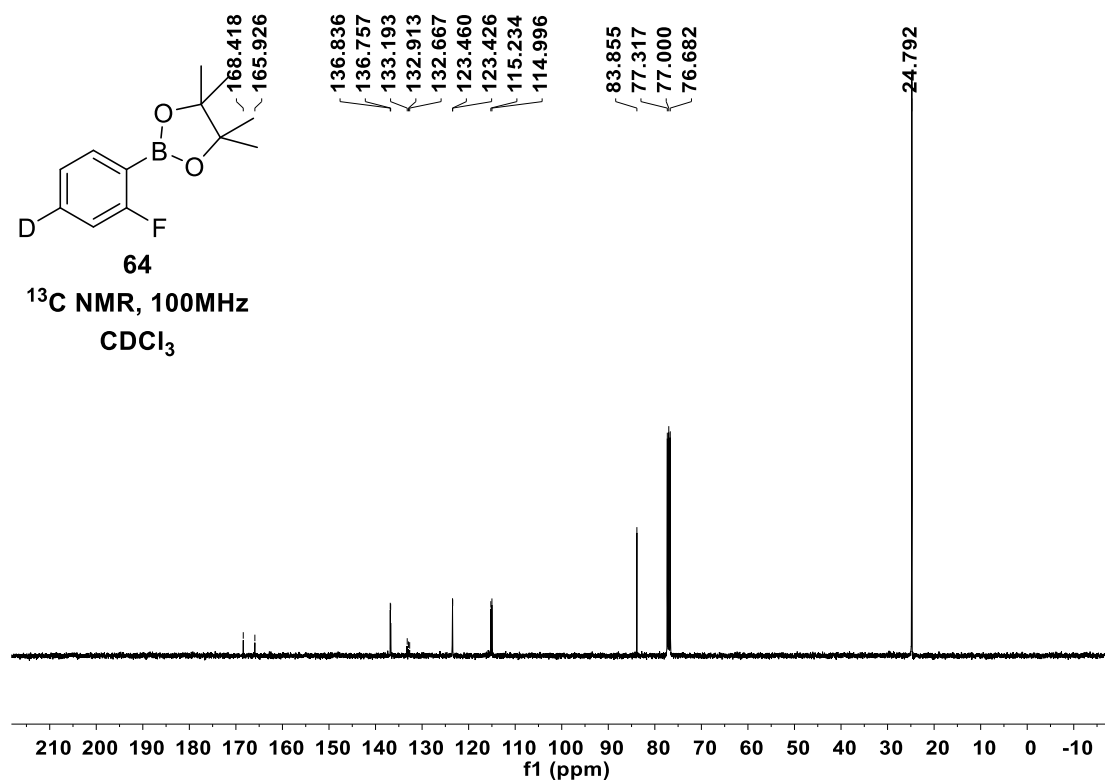

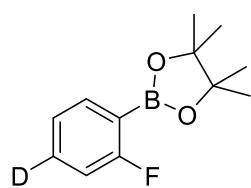

64

$^{19}\text{F}$  NMR, 301MHz

$\text{CDCl}_3$

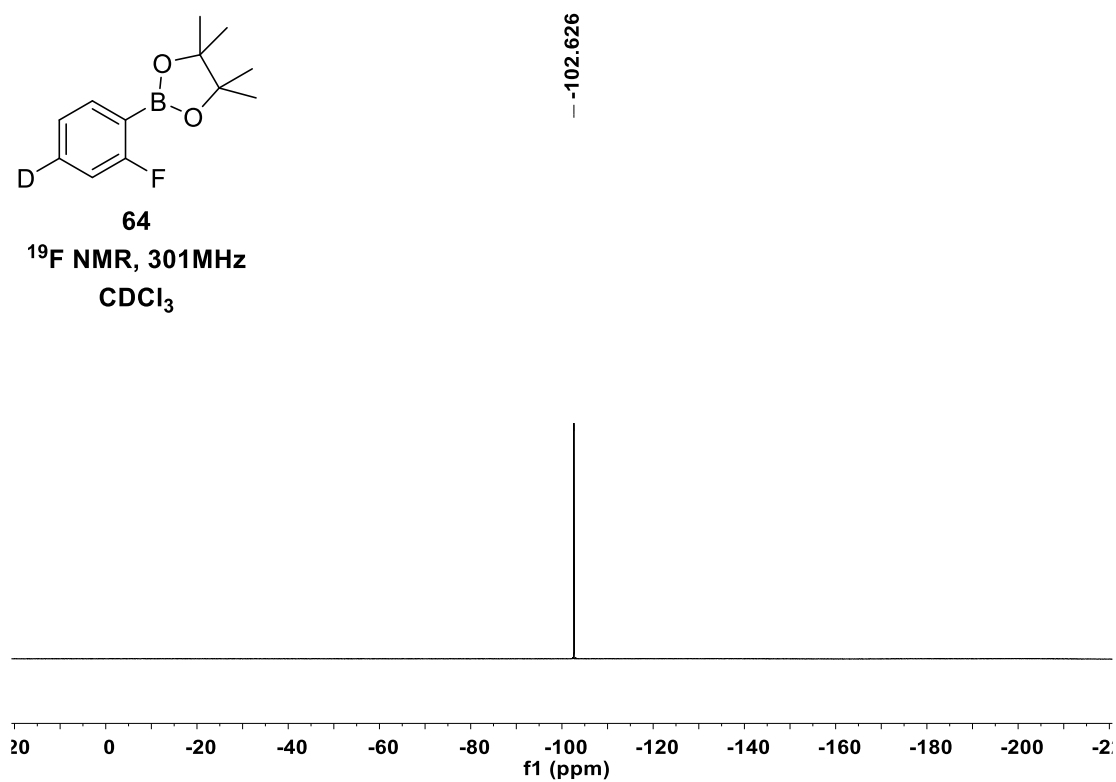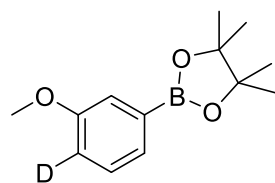

65

$^1\text{H}$  NMR, 400MHz

$\text{CDCl}_3$

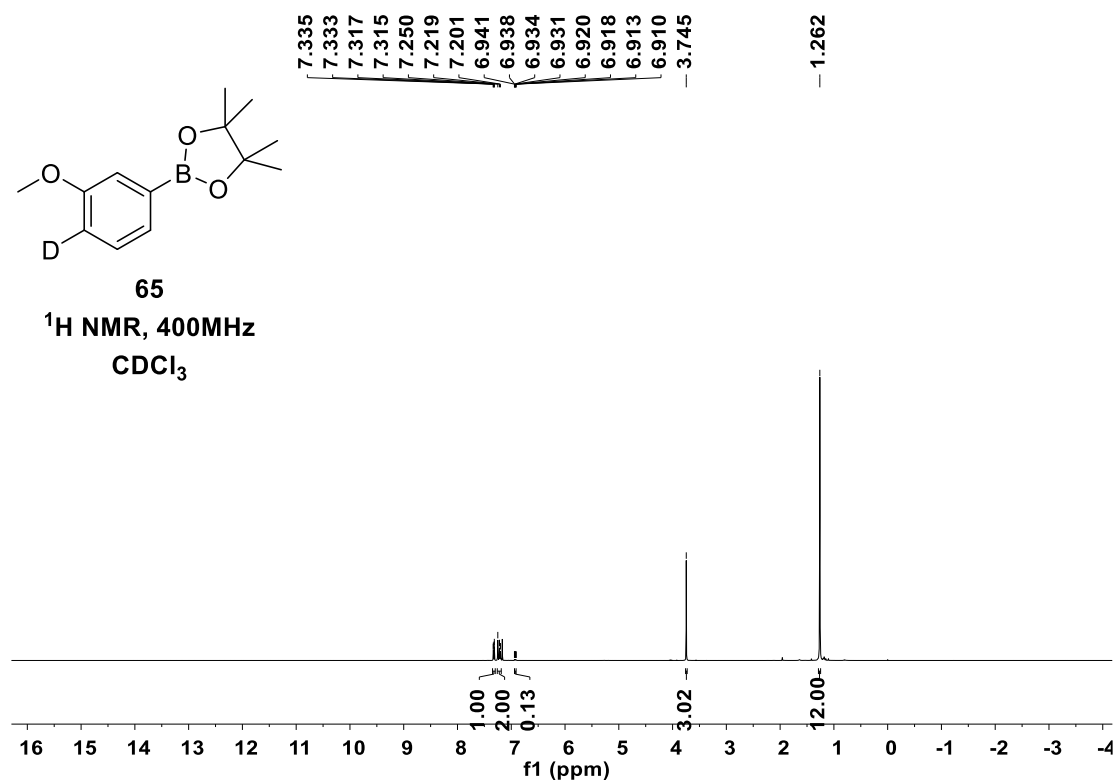

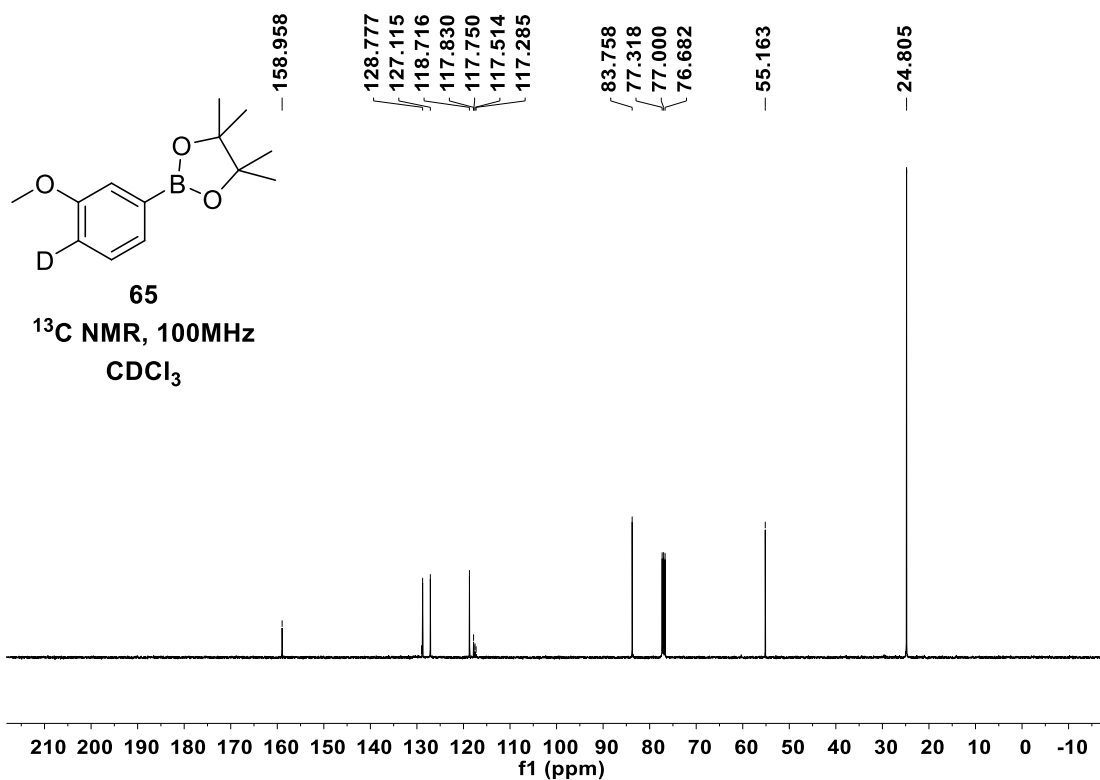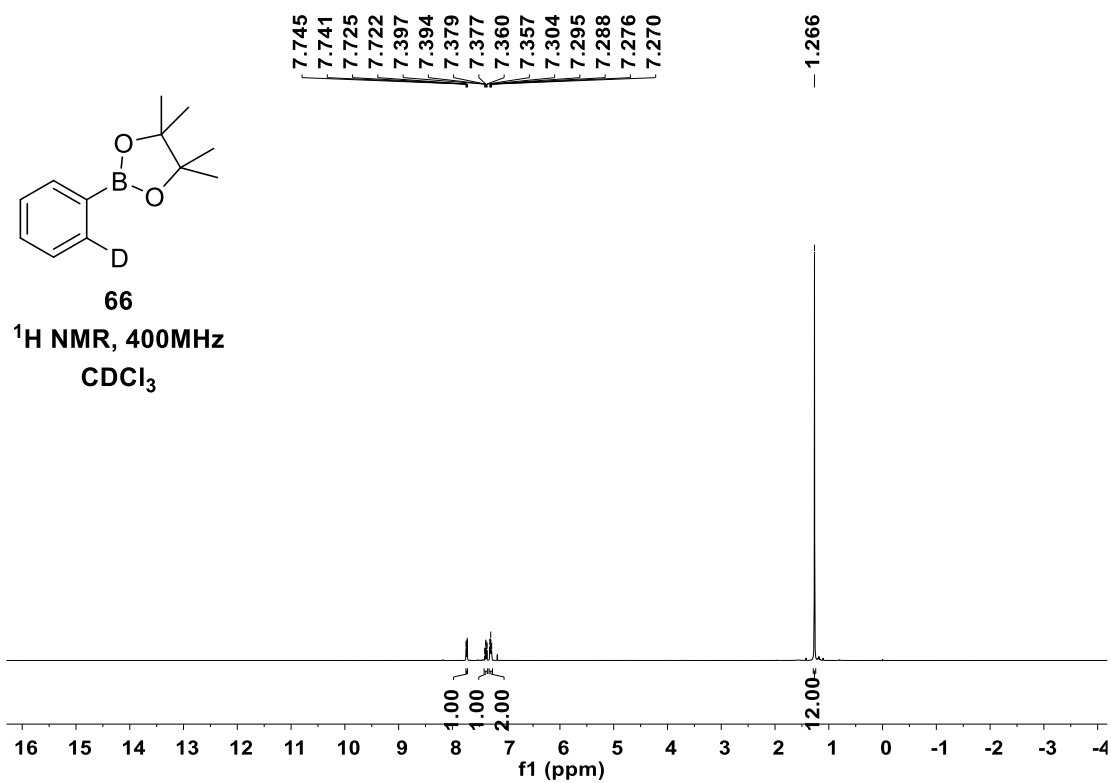

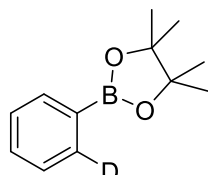

66

$^{13}\text{C}$  NMR, 100MHz  
 $\text{CDCl}_3$

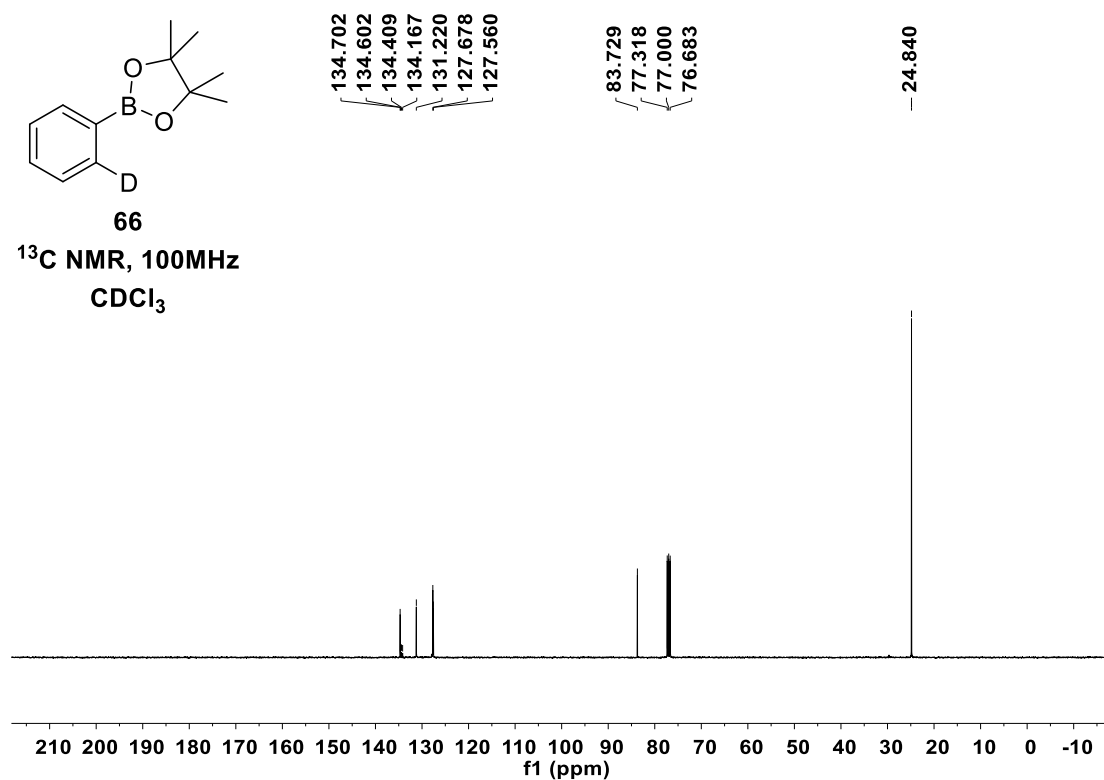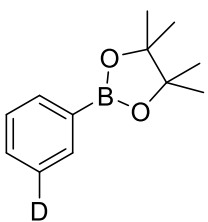

67

$^1\text{H}$  NMR, 400MHz  
 $\text{CDCl}_3$

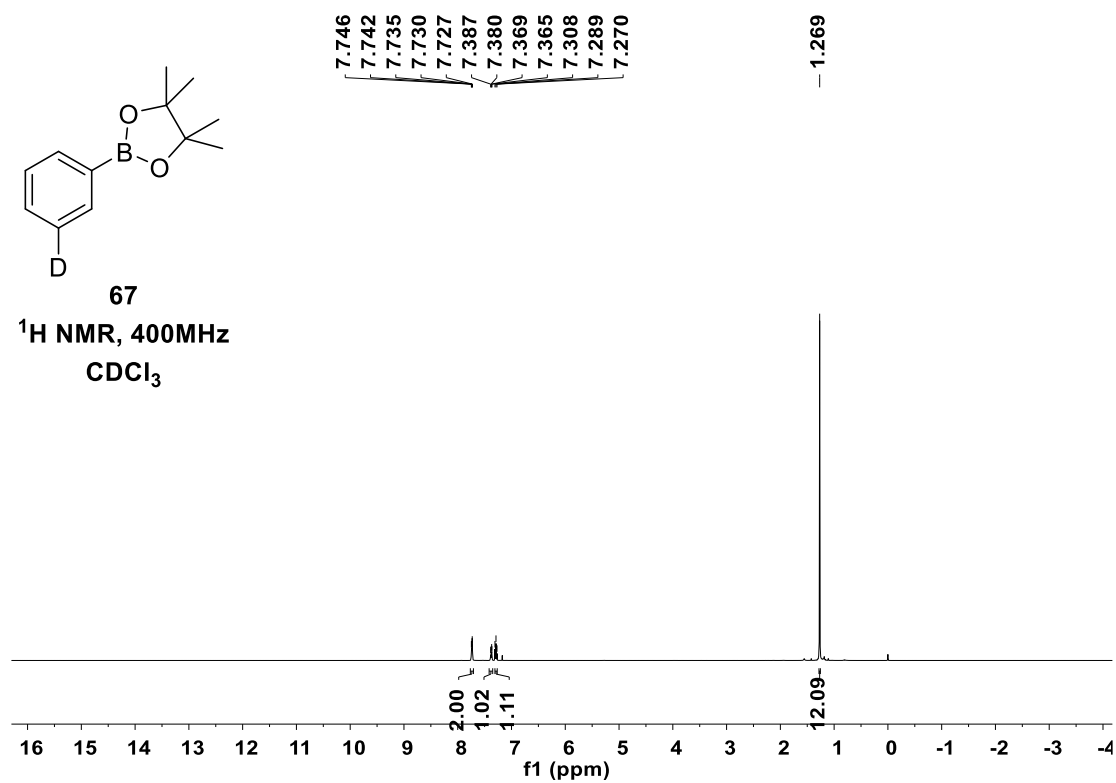

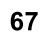

134.718  
134.603  
131.223  
131.115  
127.674  
127.383  
127.140

83.733  
77.318  
77.000  
76.683

— 24.847

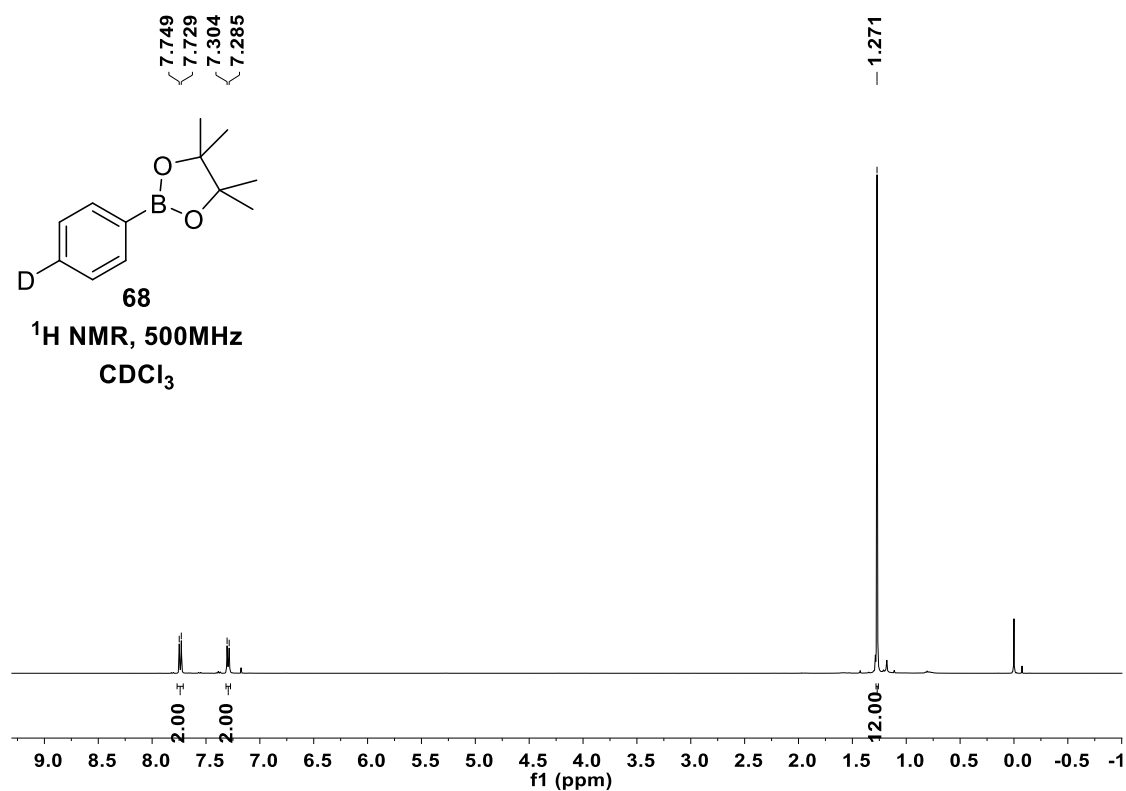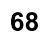

7.749  
7.729  
7.304  
7.285

— 1.271



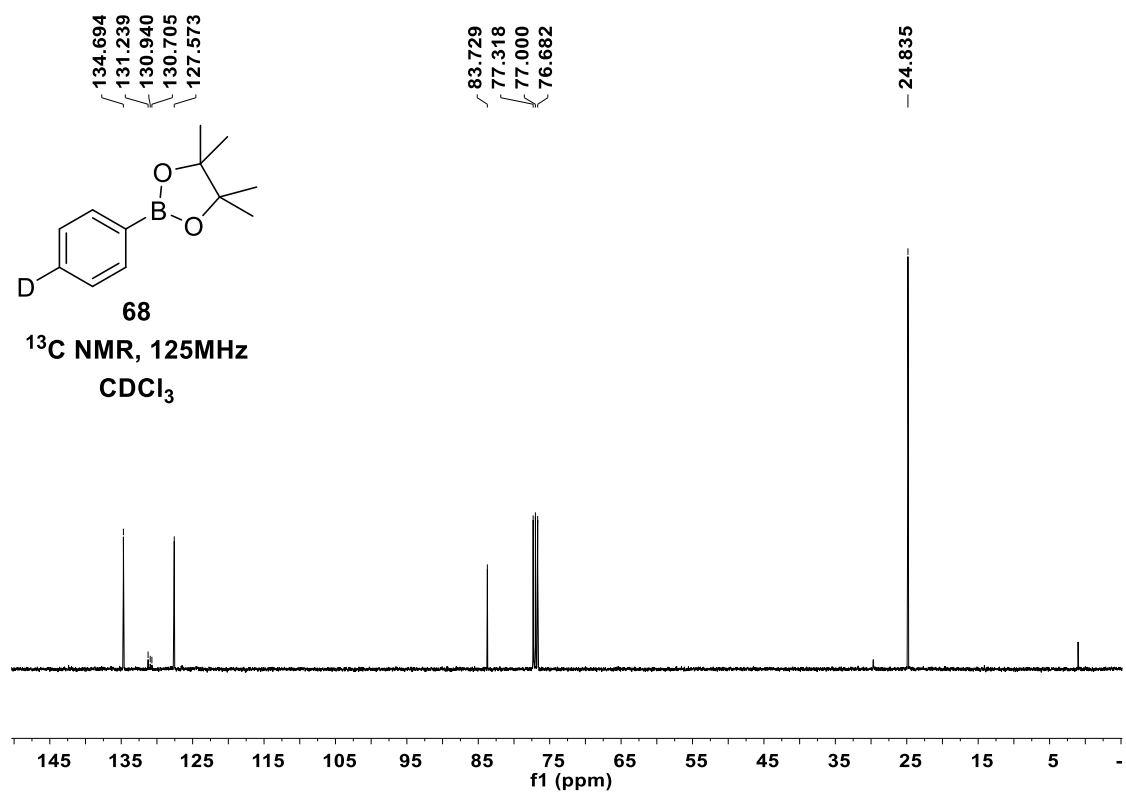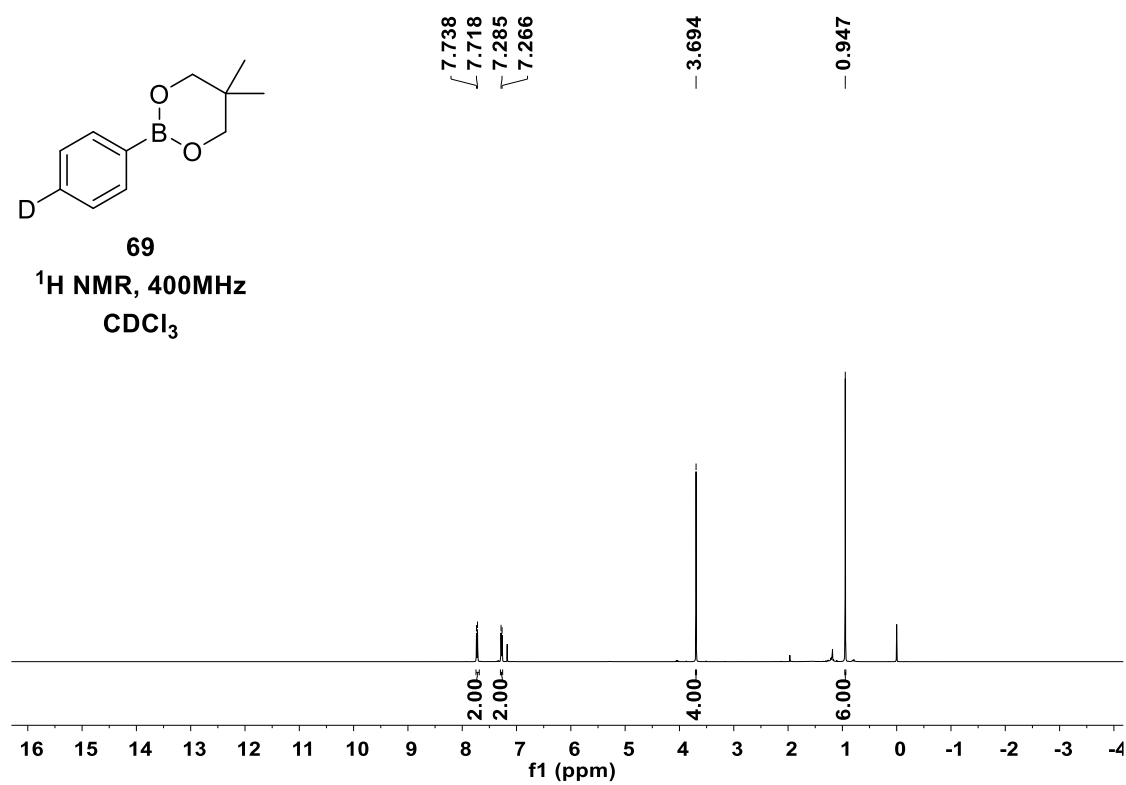

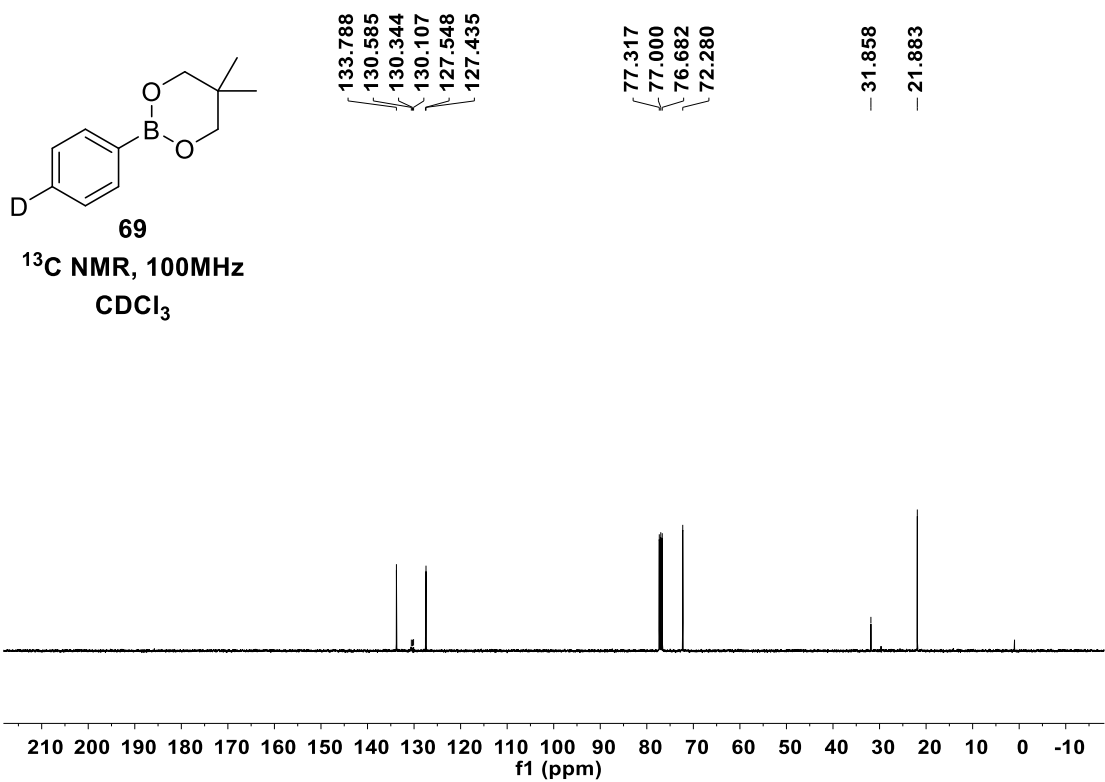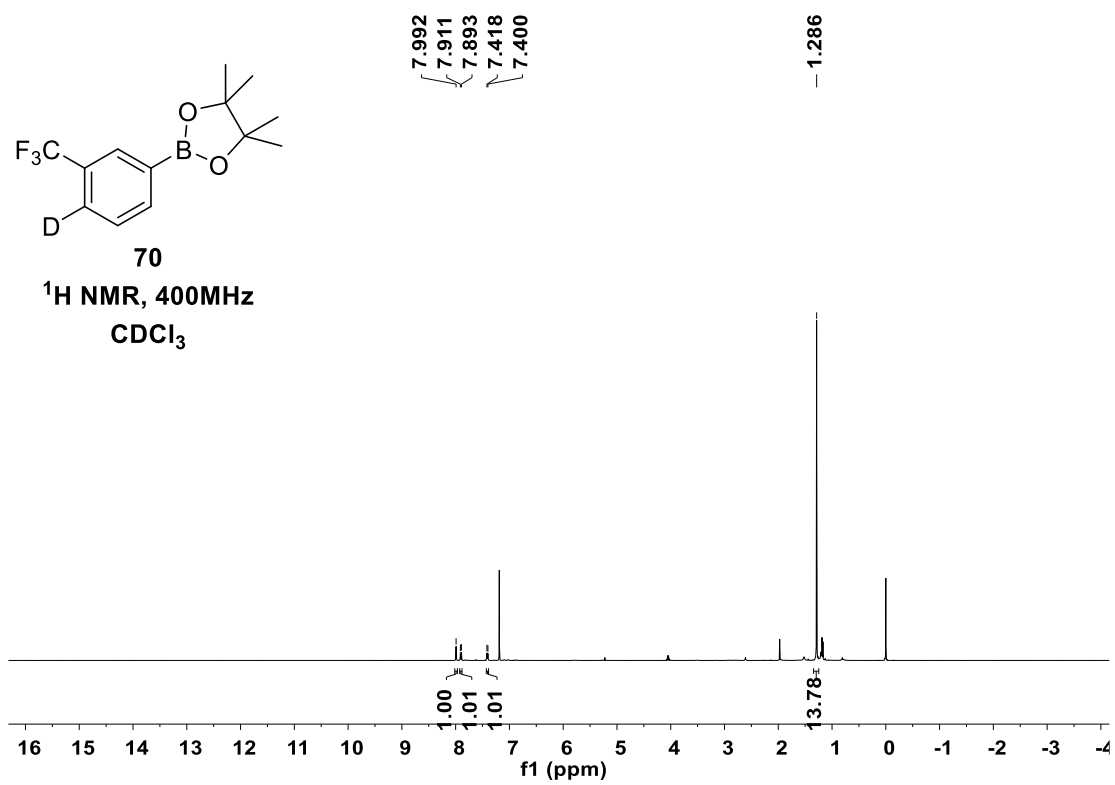

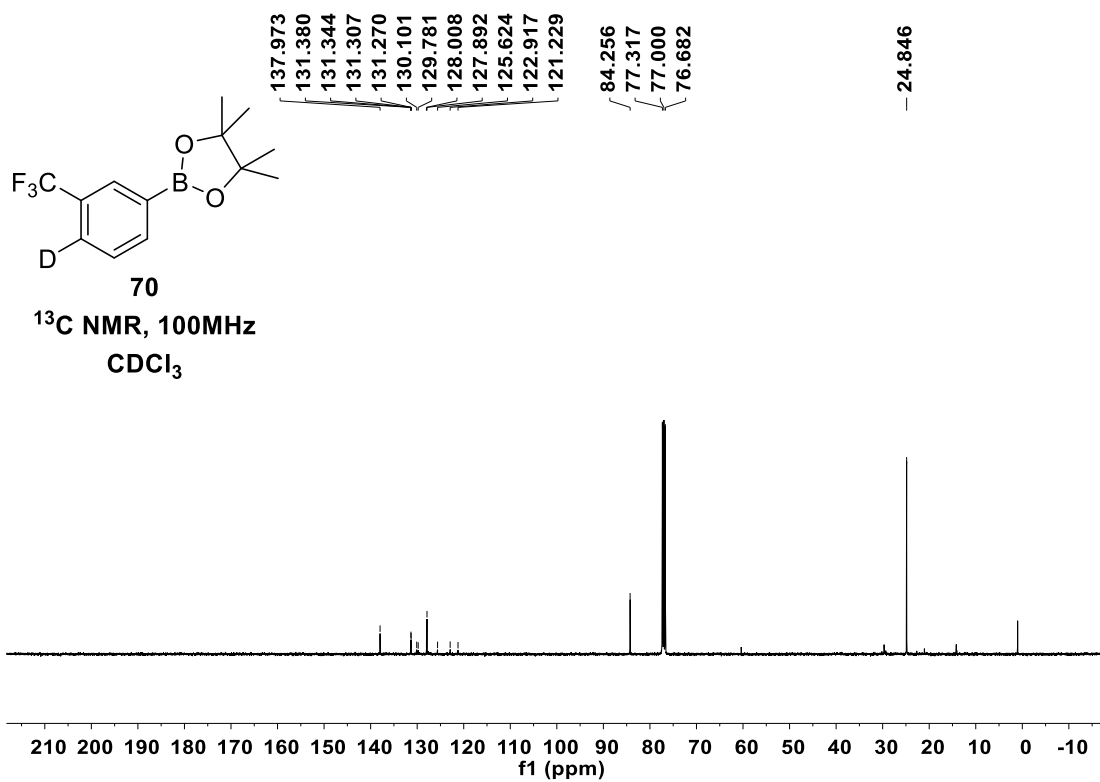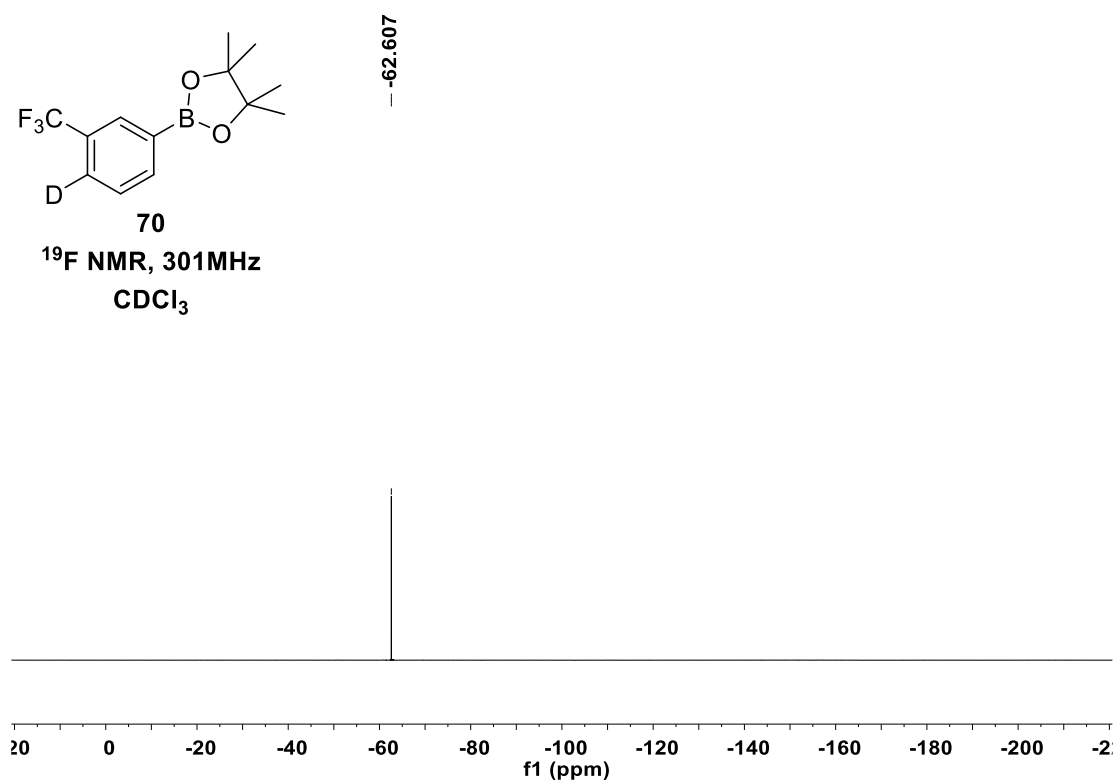

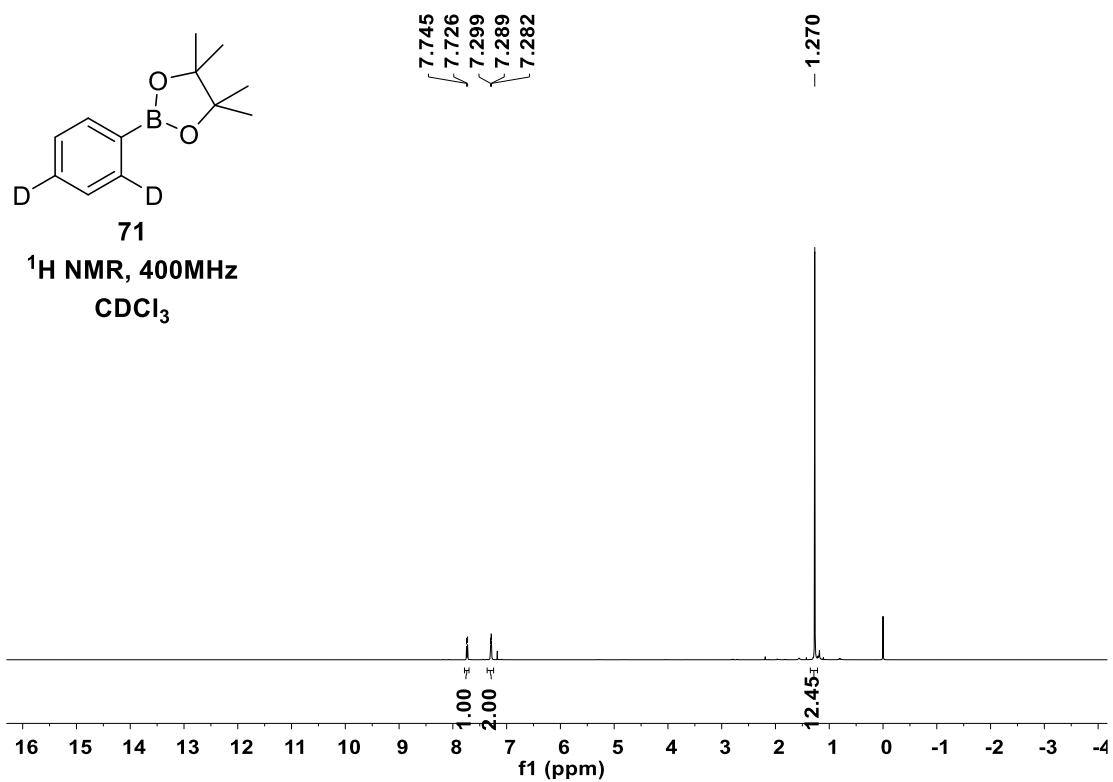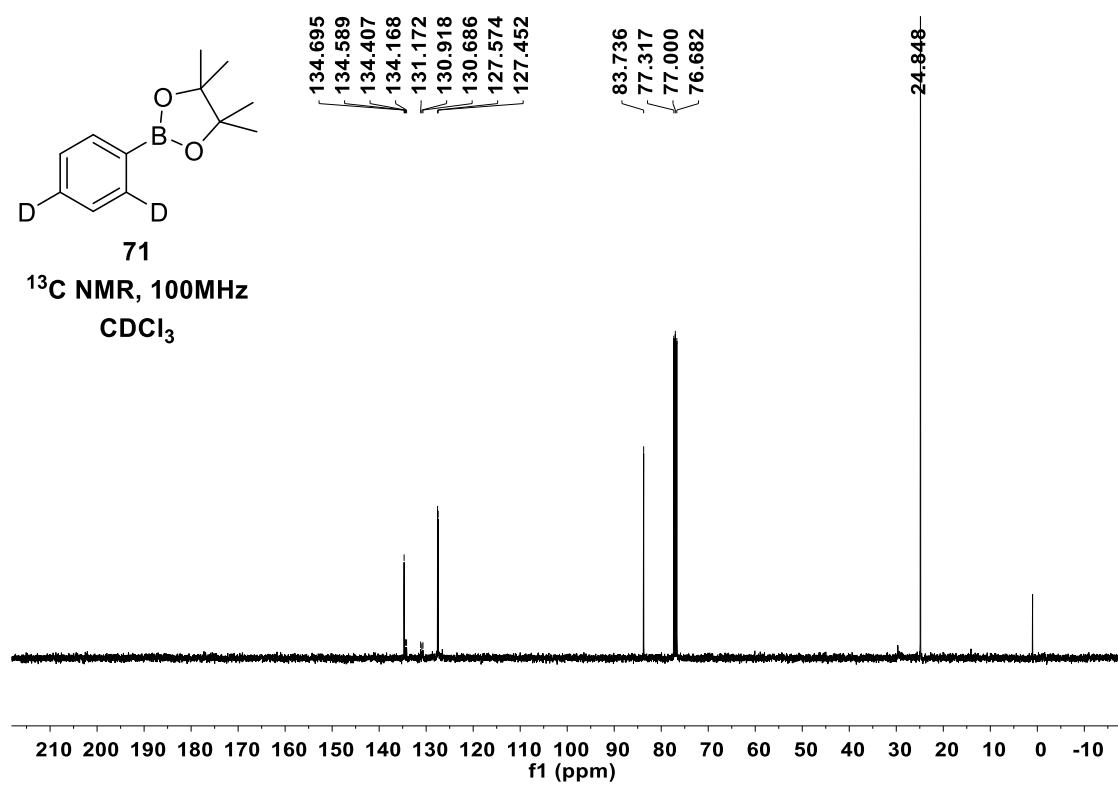

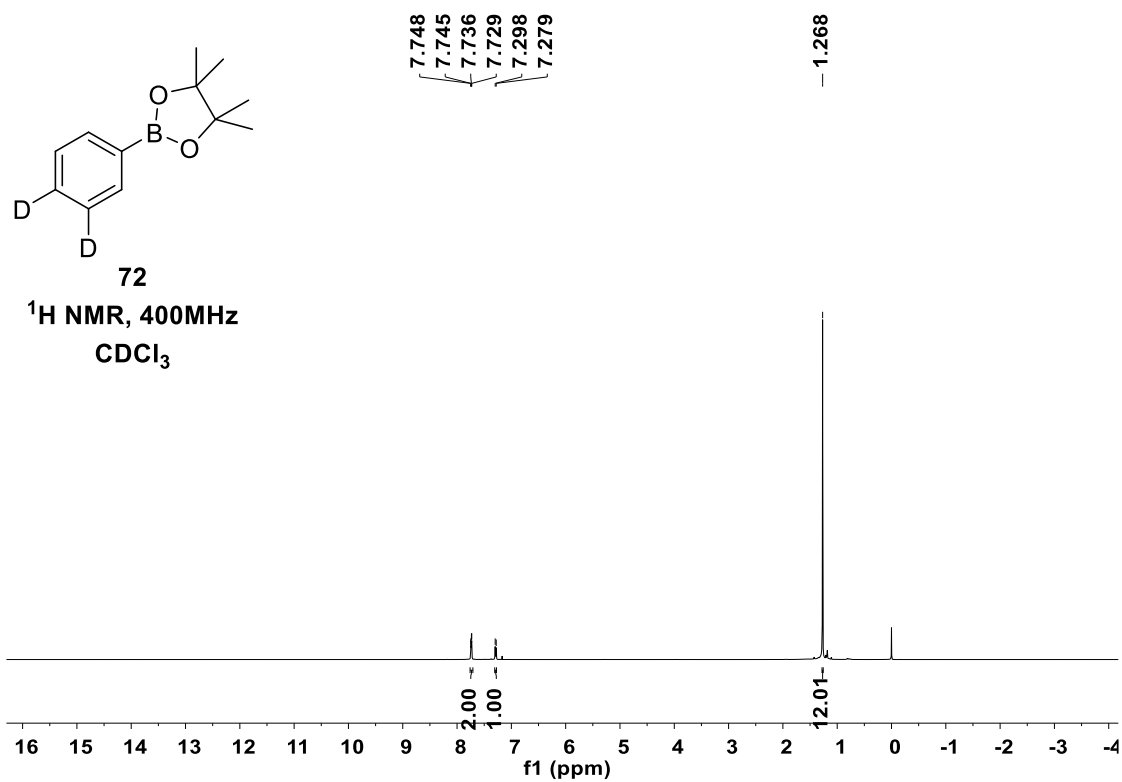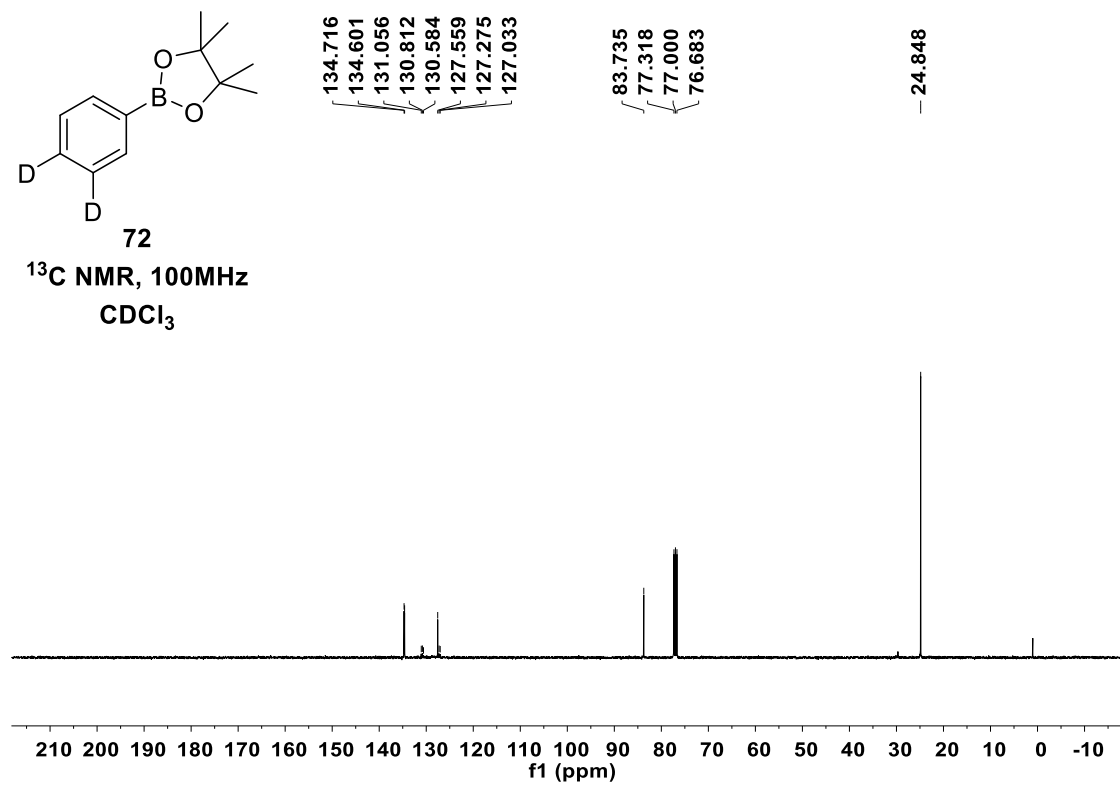

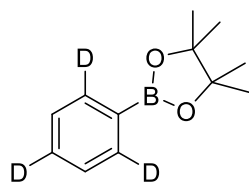

73

<sup>1</sup>H NMR, 400MHz  
CDCl<sub>3</sub>

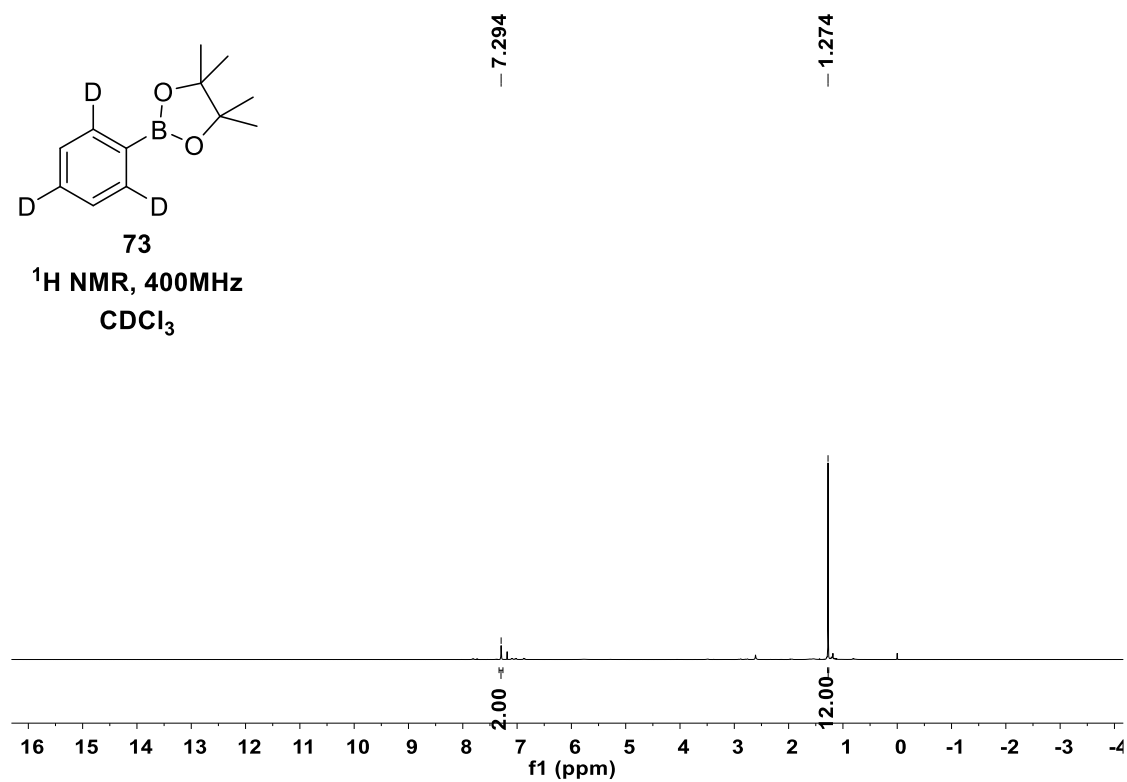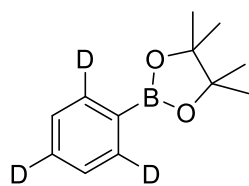

73

<sup>13</sup>C NMR, 100MHz  
CDCl<sub>3</sub>

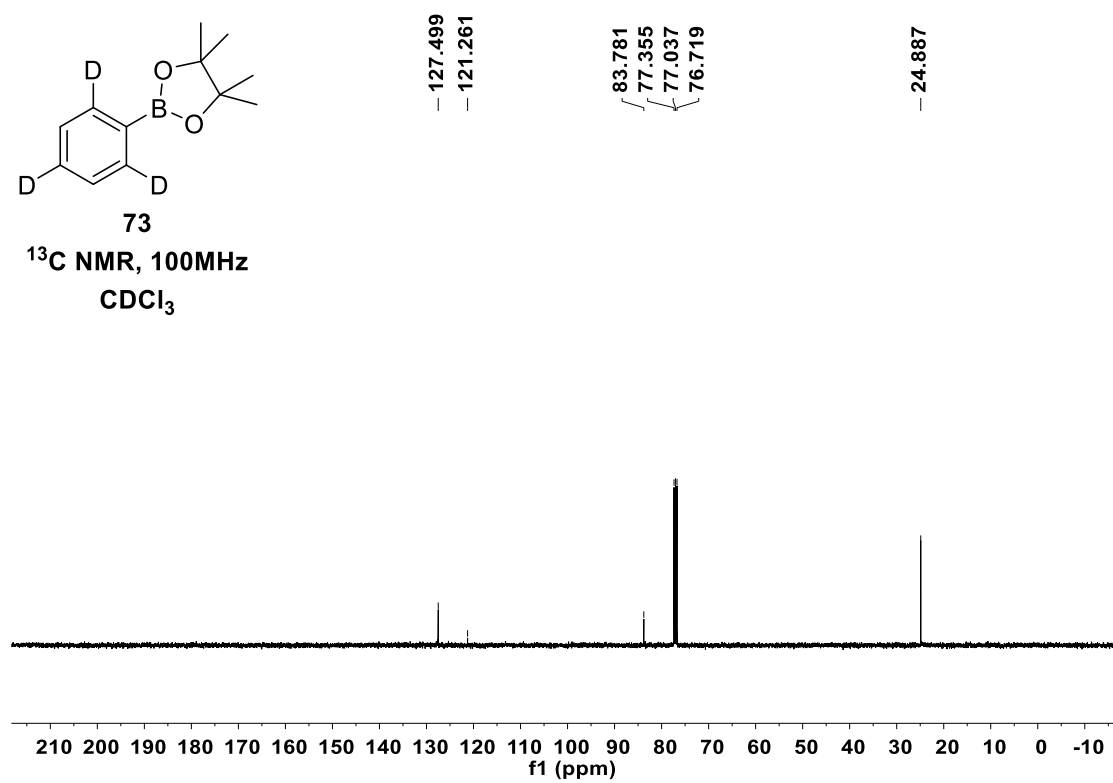

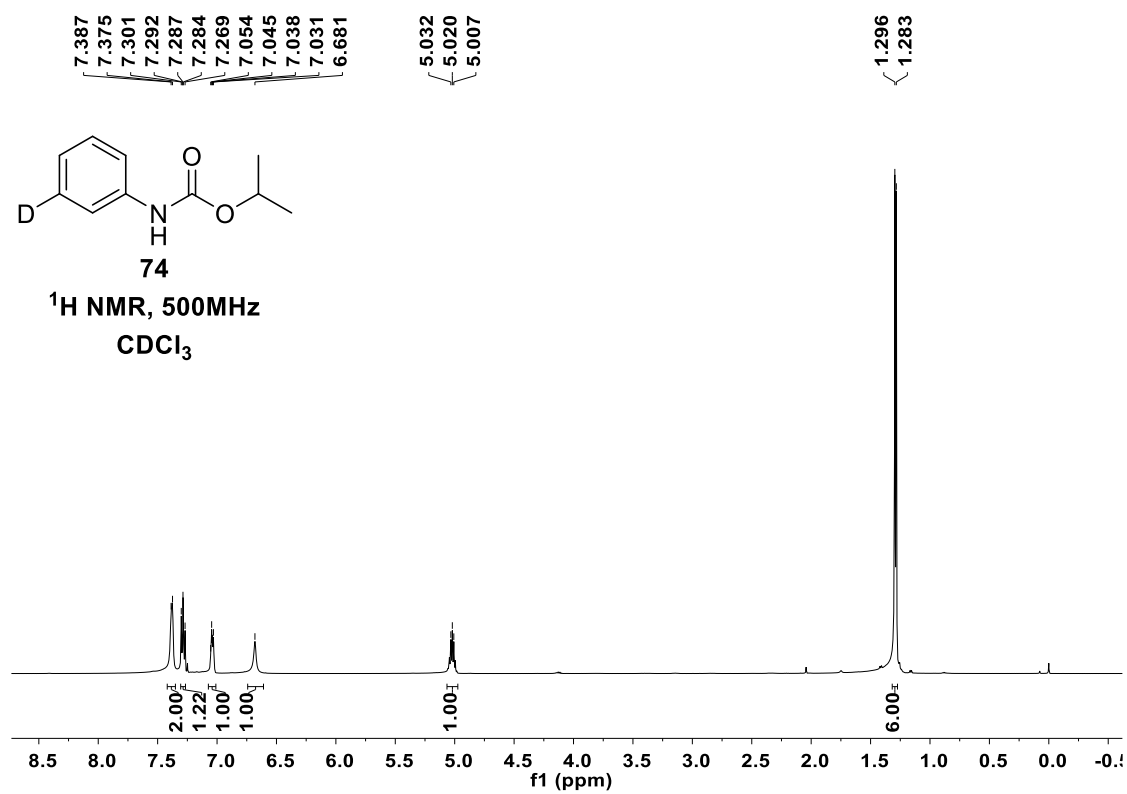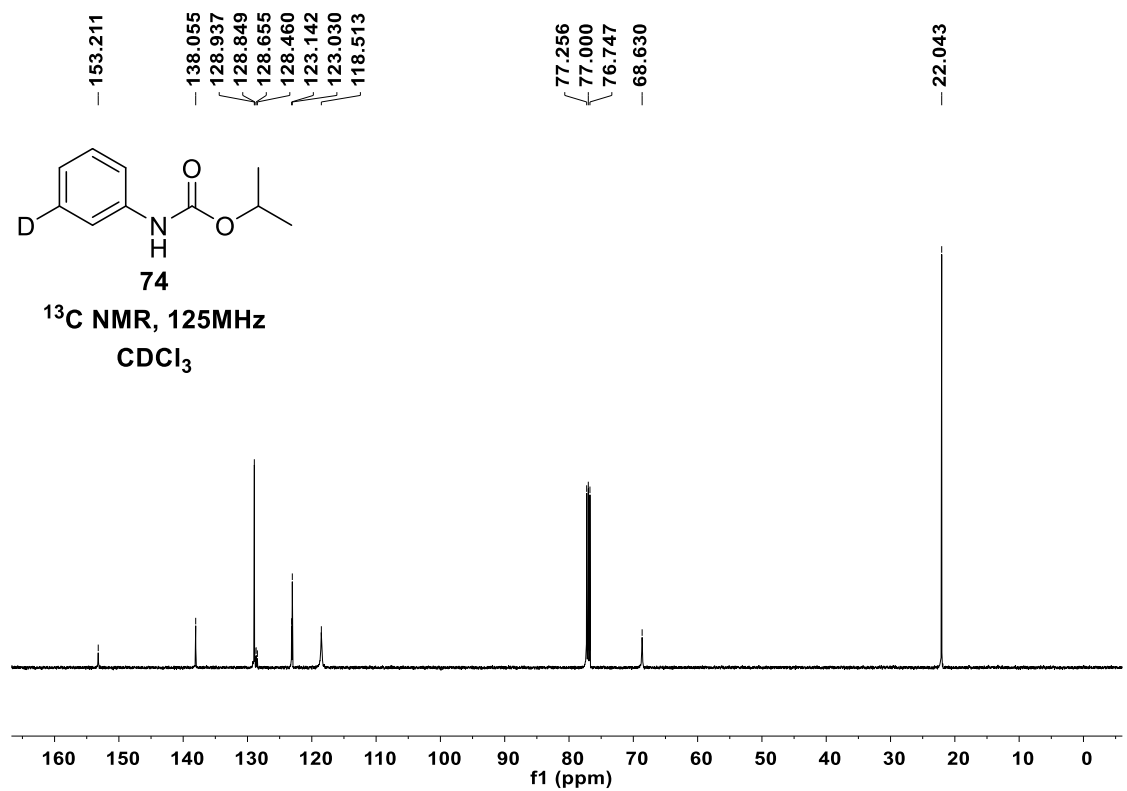

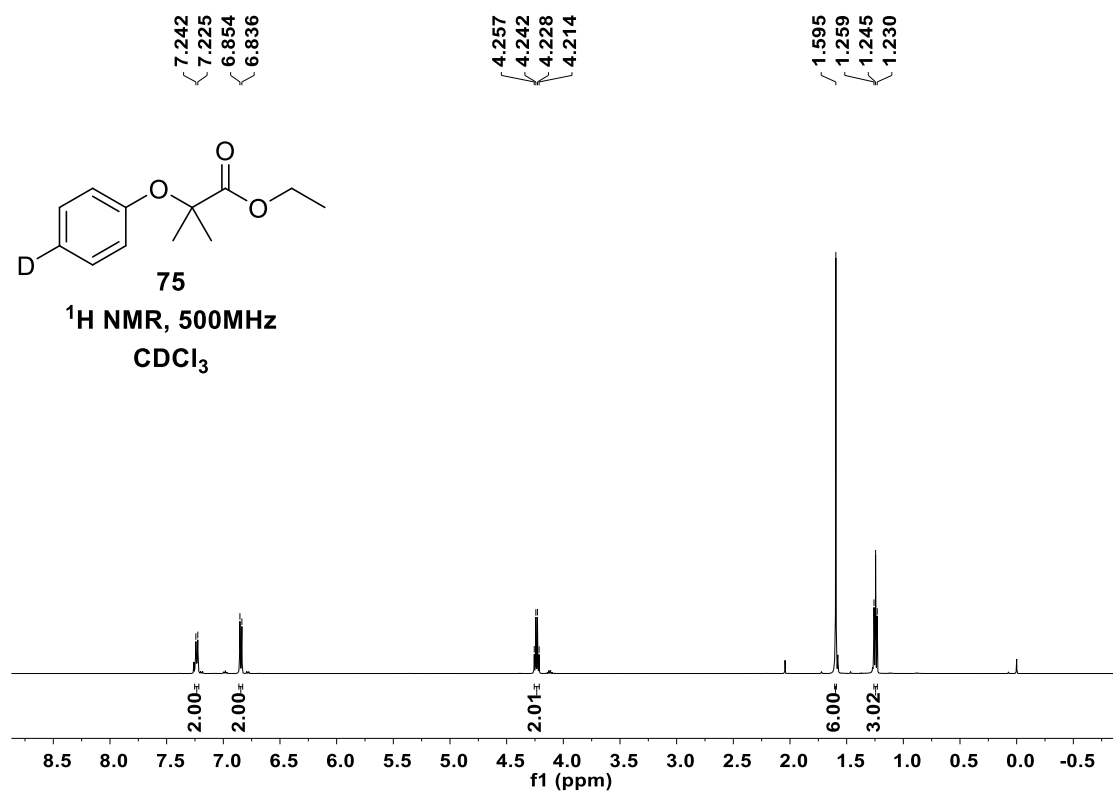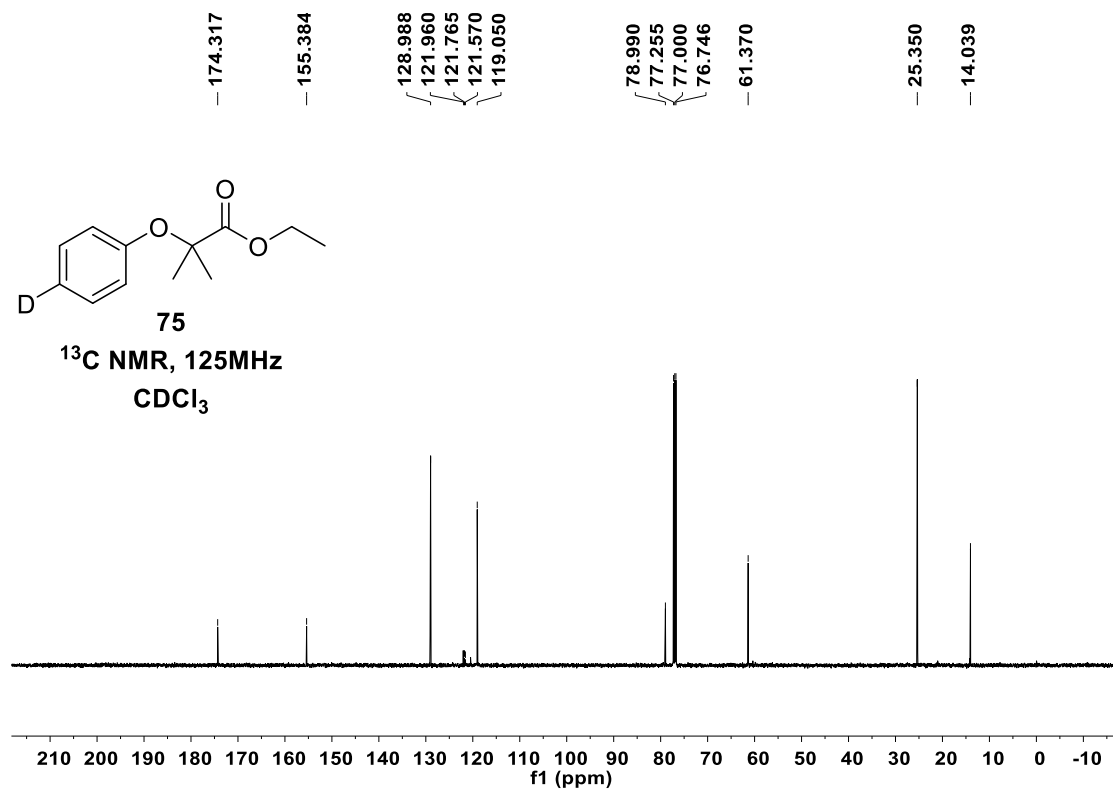

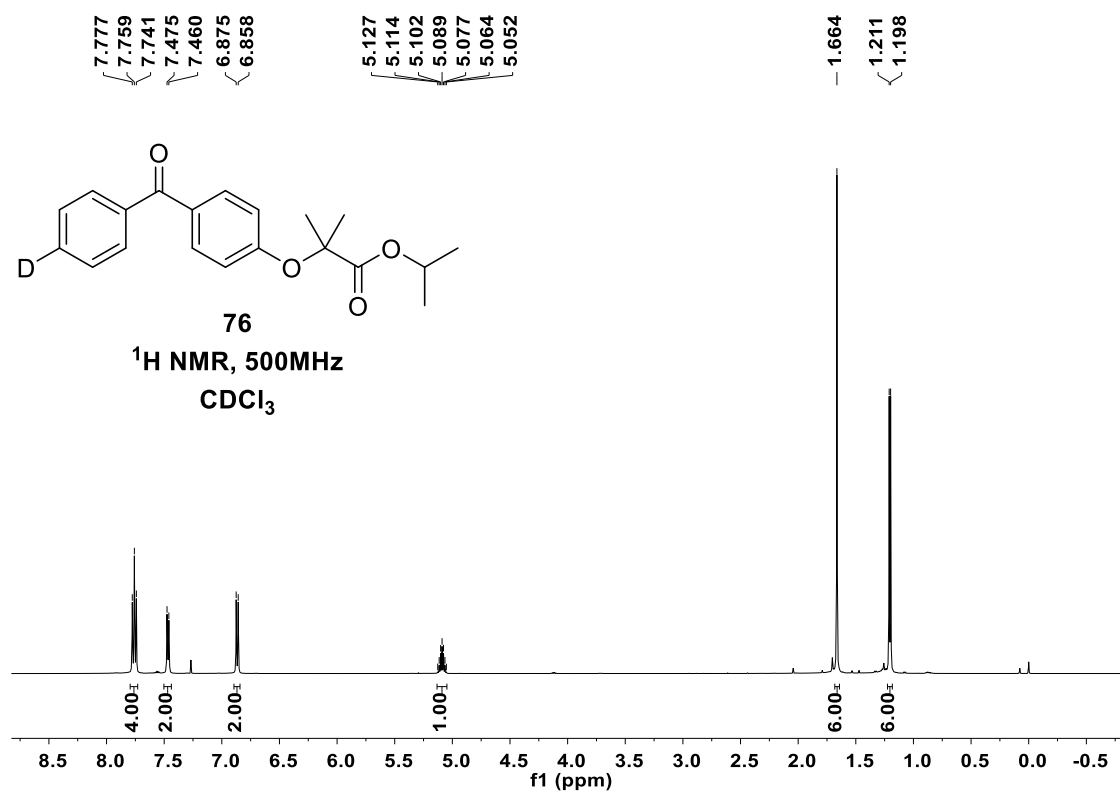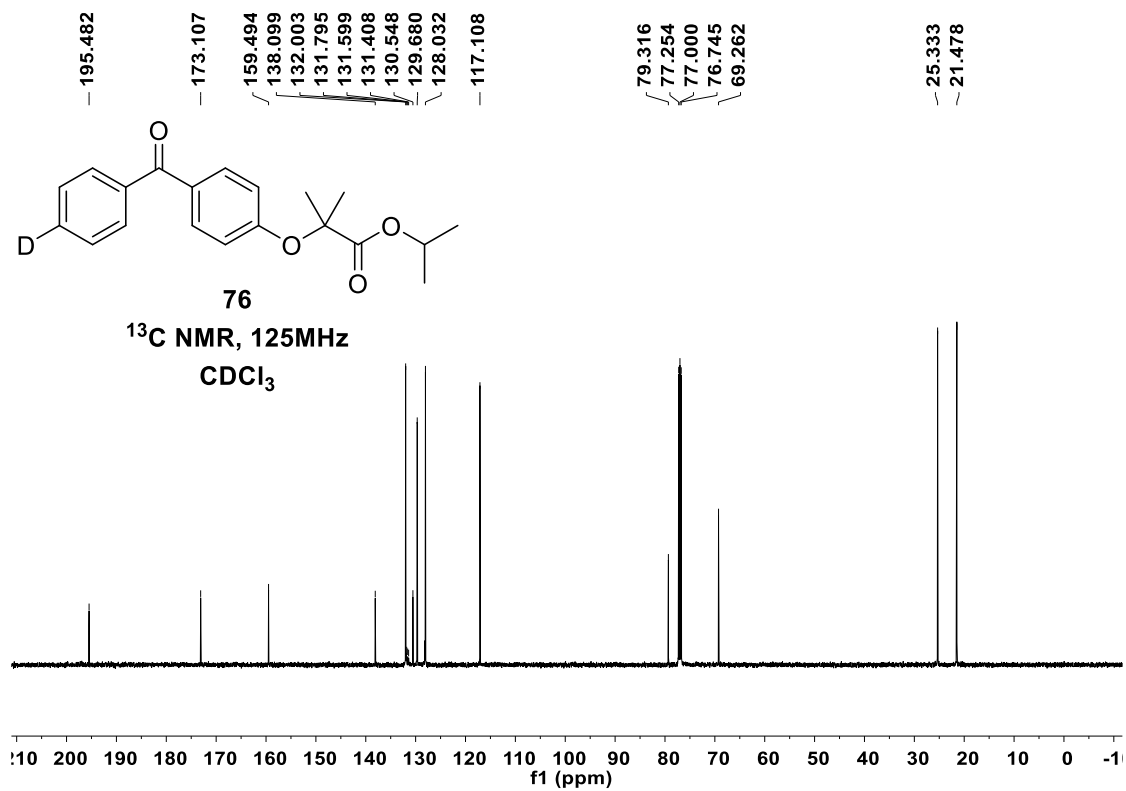

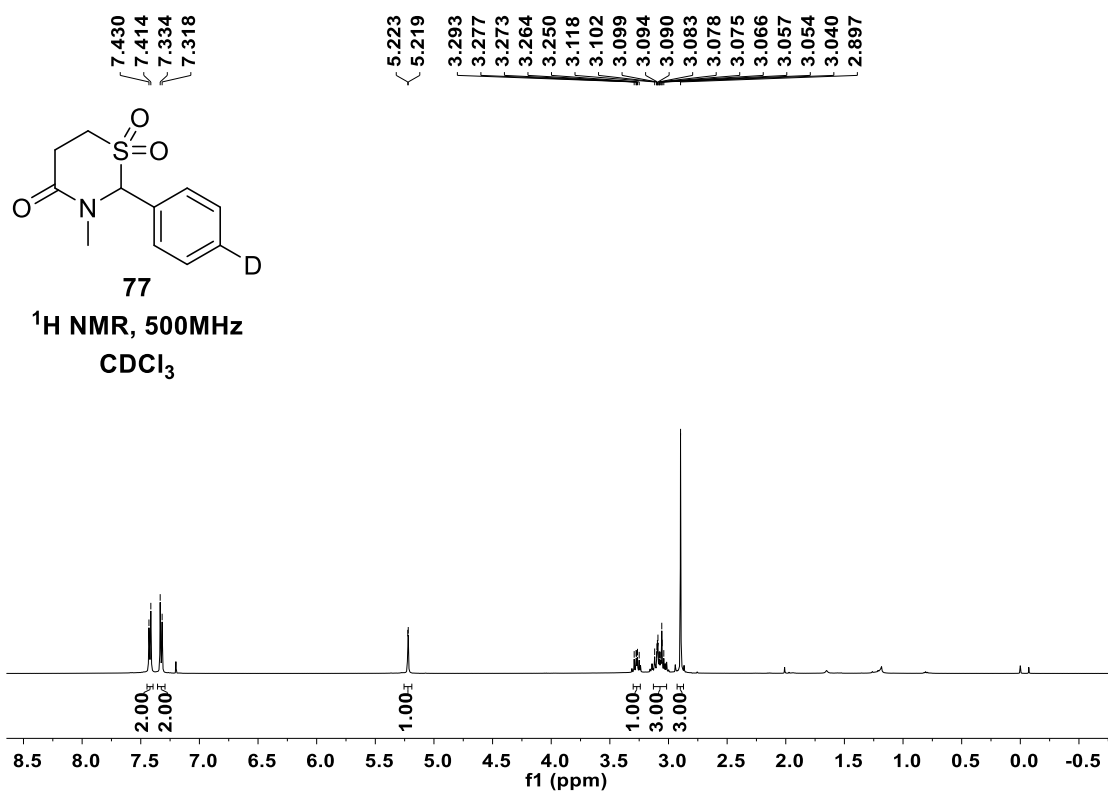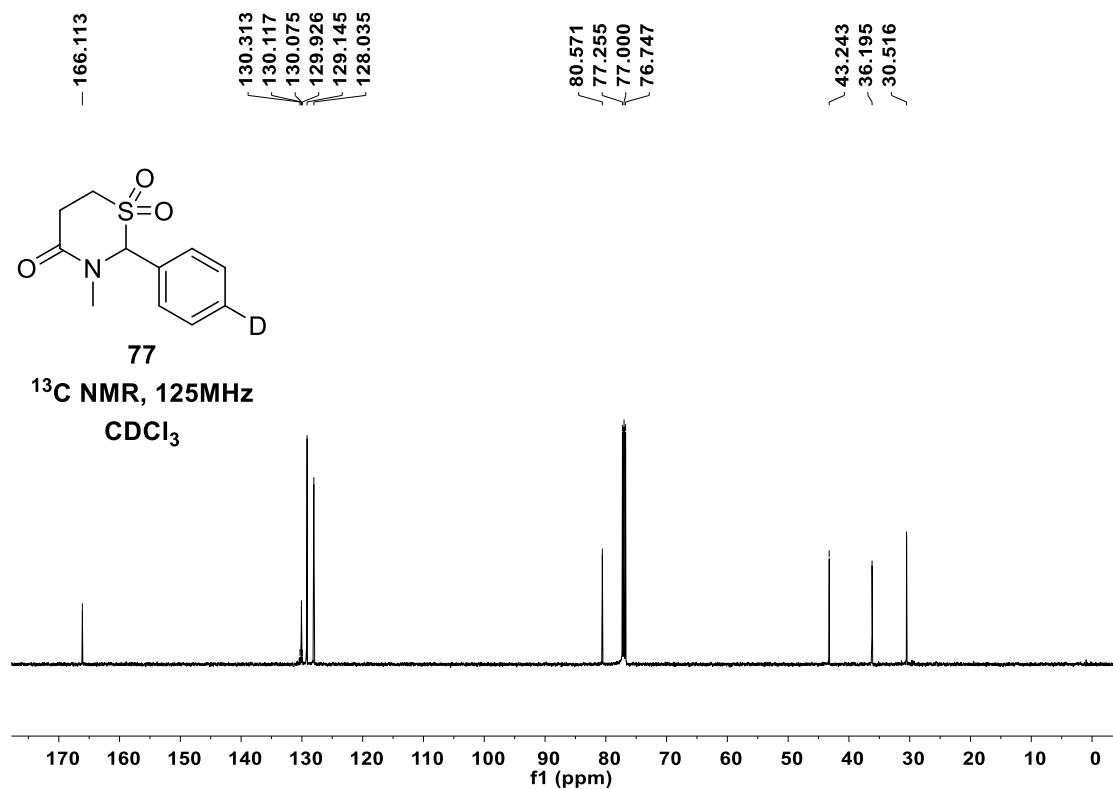

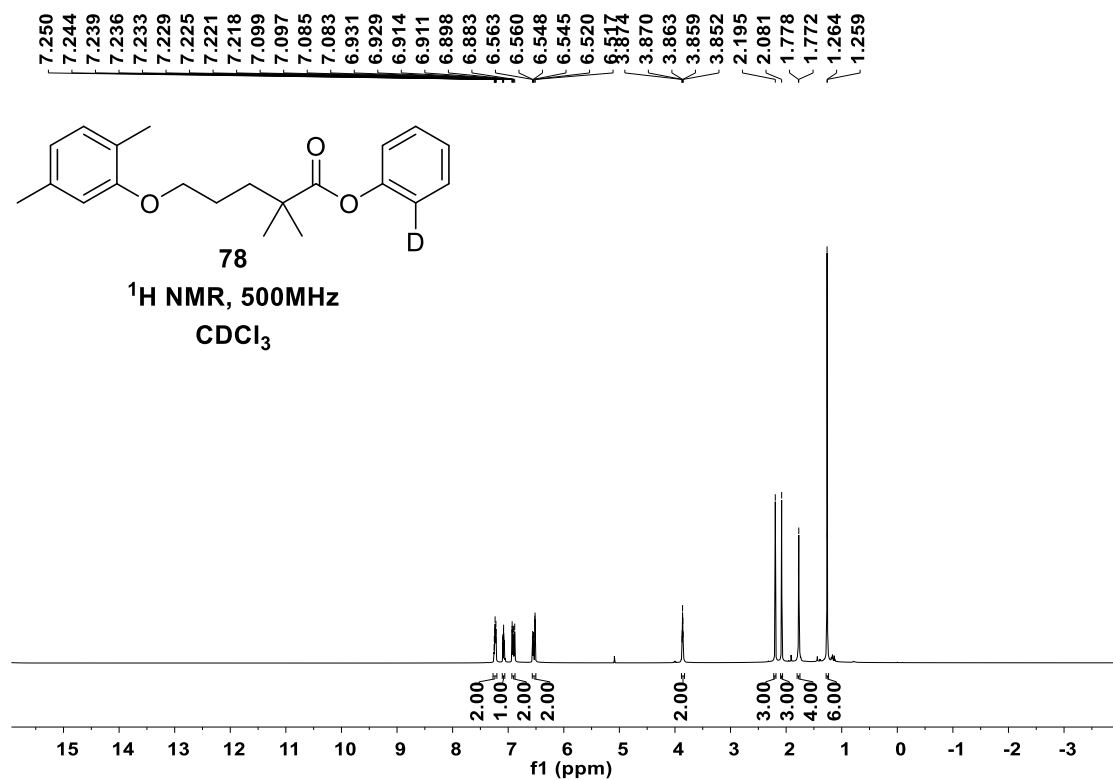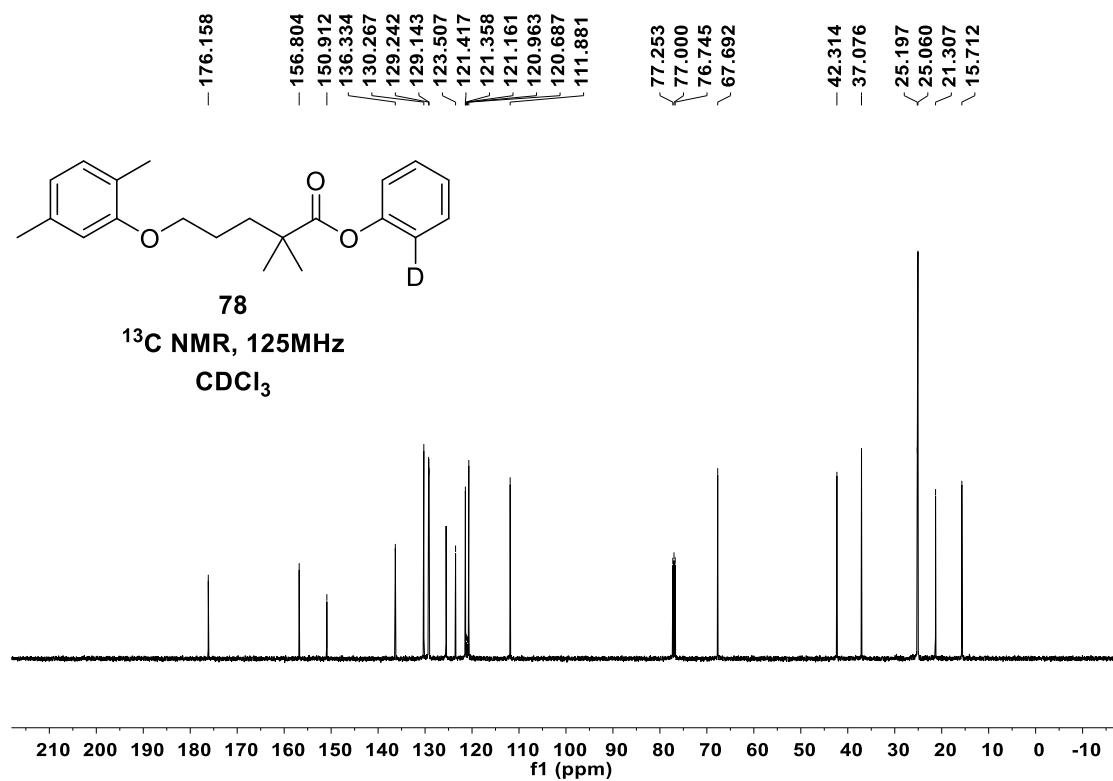

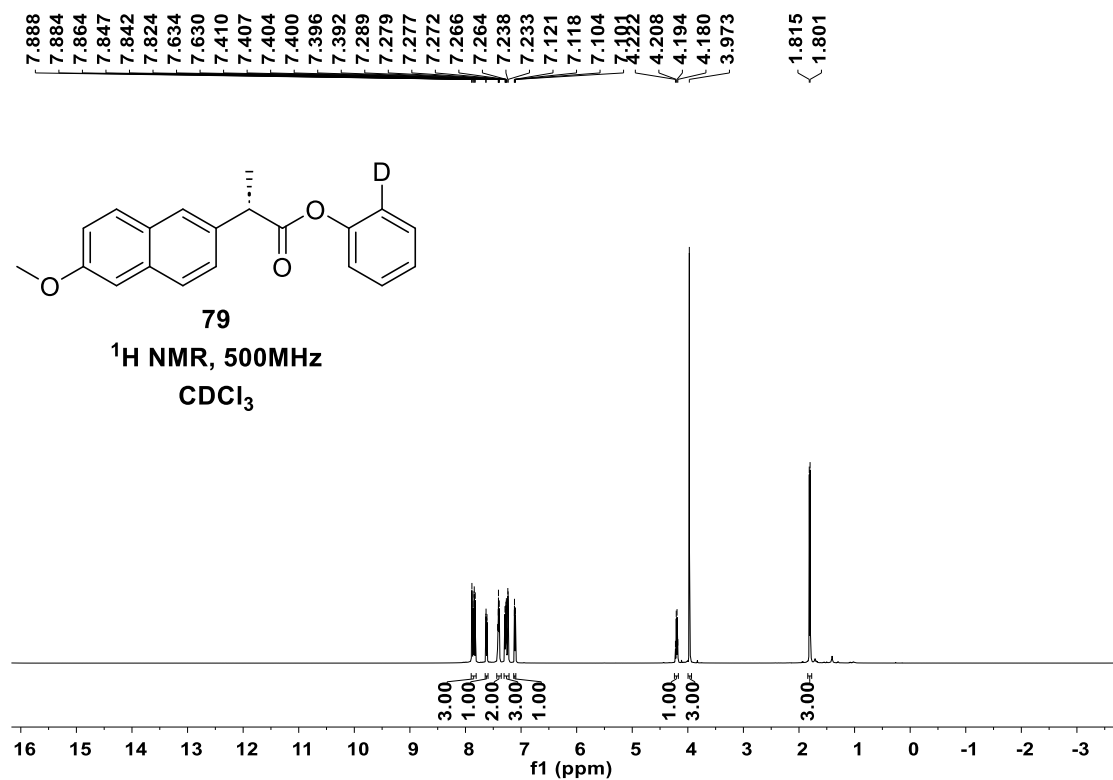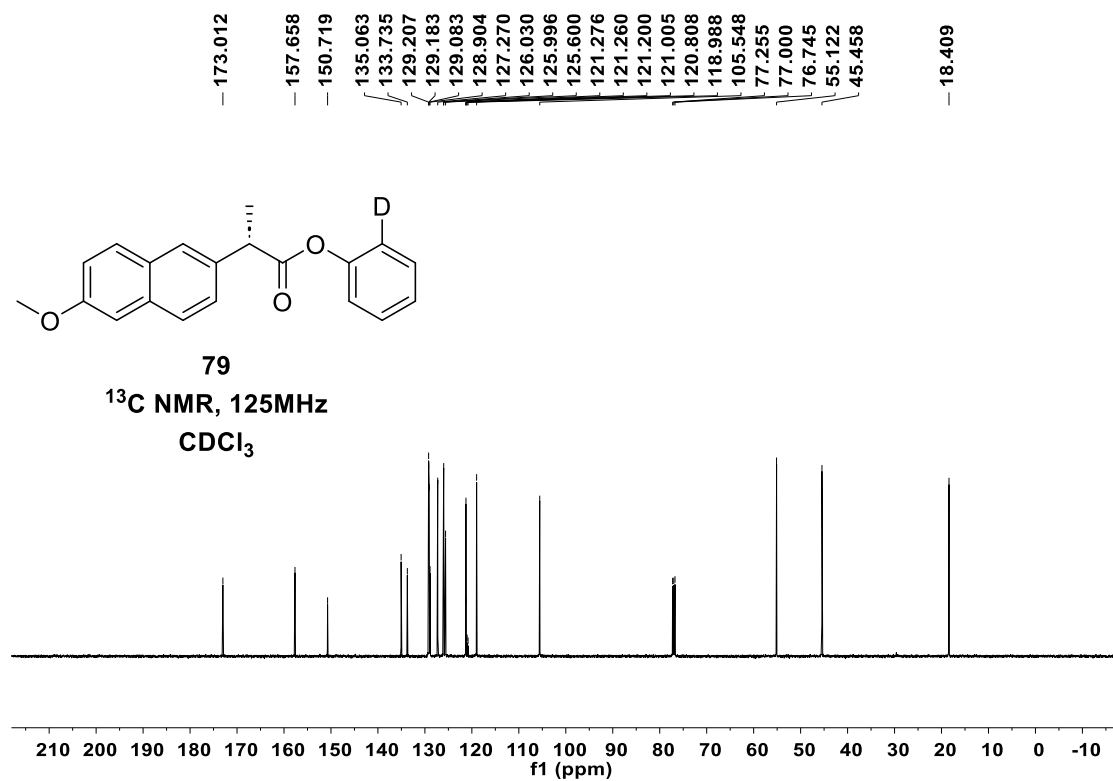

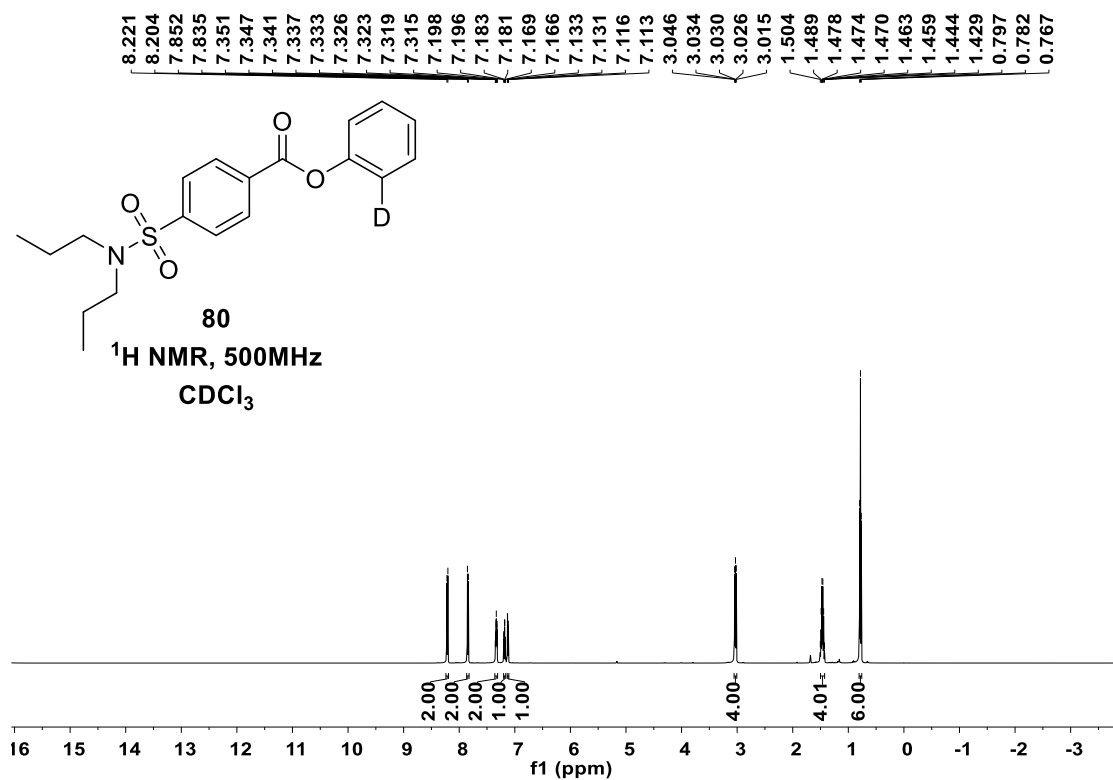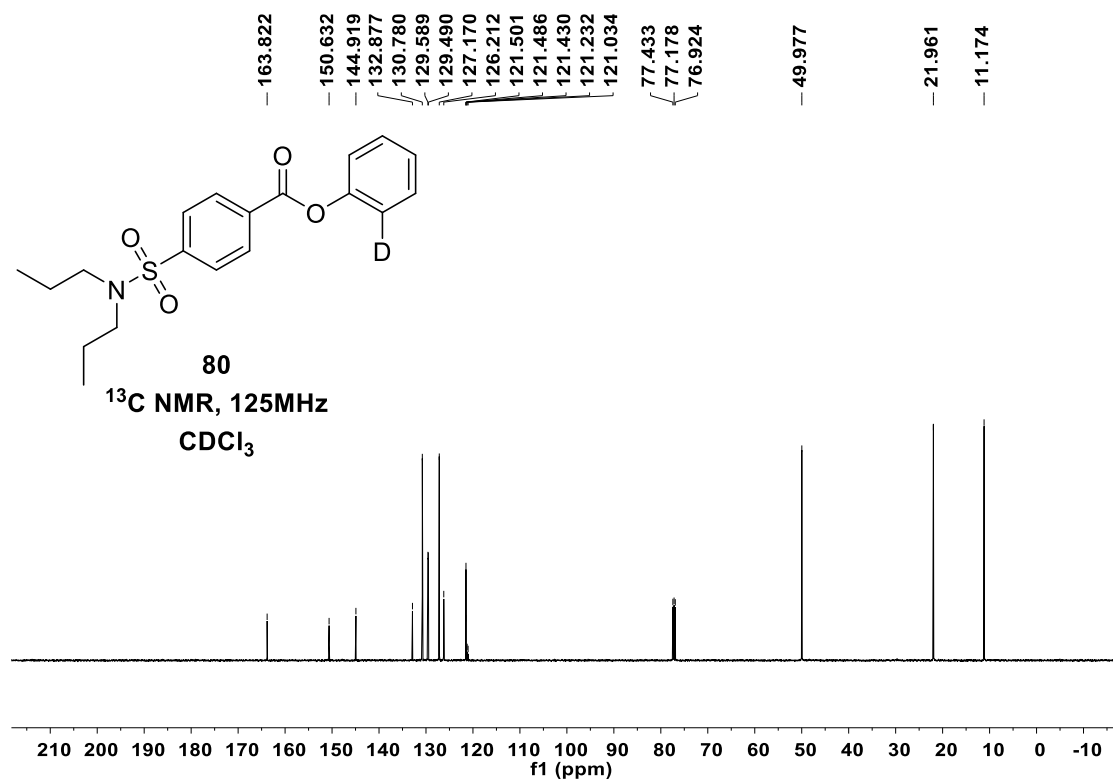

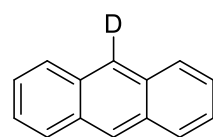

81

<sup>1</sup>H NMR, 500MHz  
CDCl<sub>3</sub>

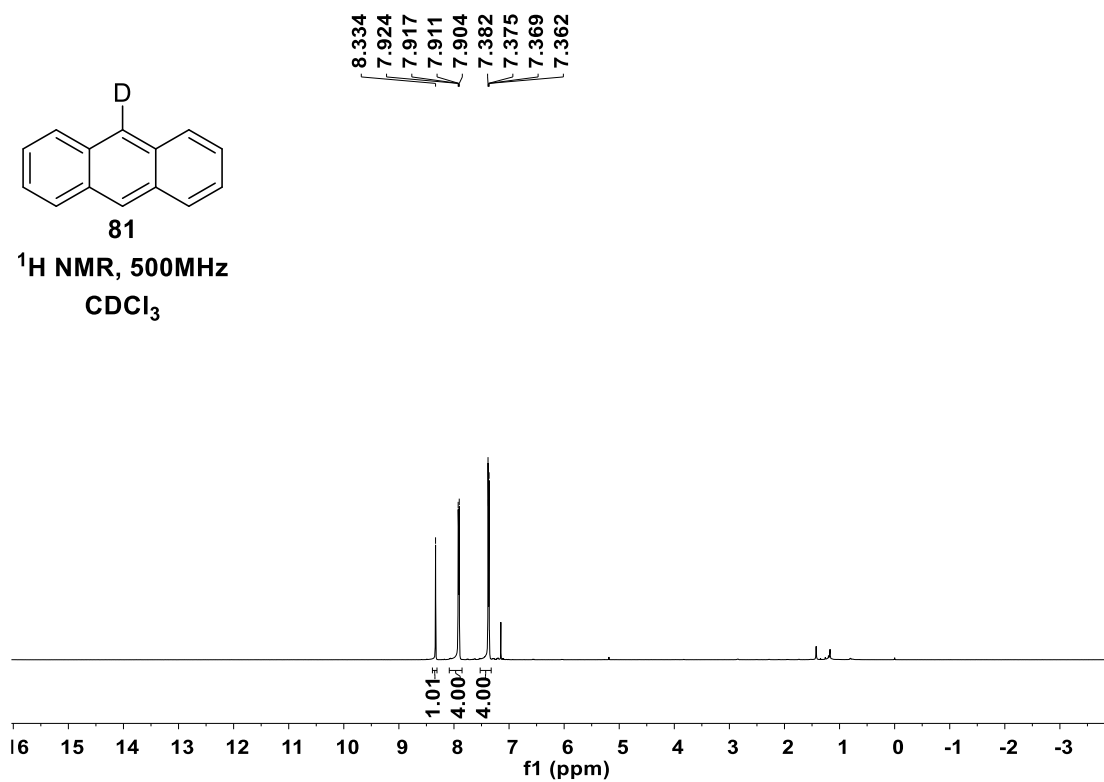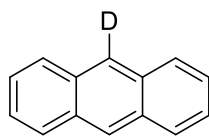

81

<sup>13</sup>C NMR, 125MHz  
CDCl<sub>3</sub>

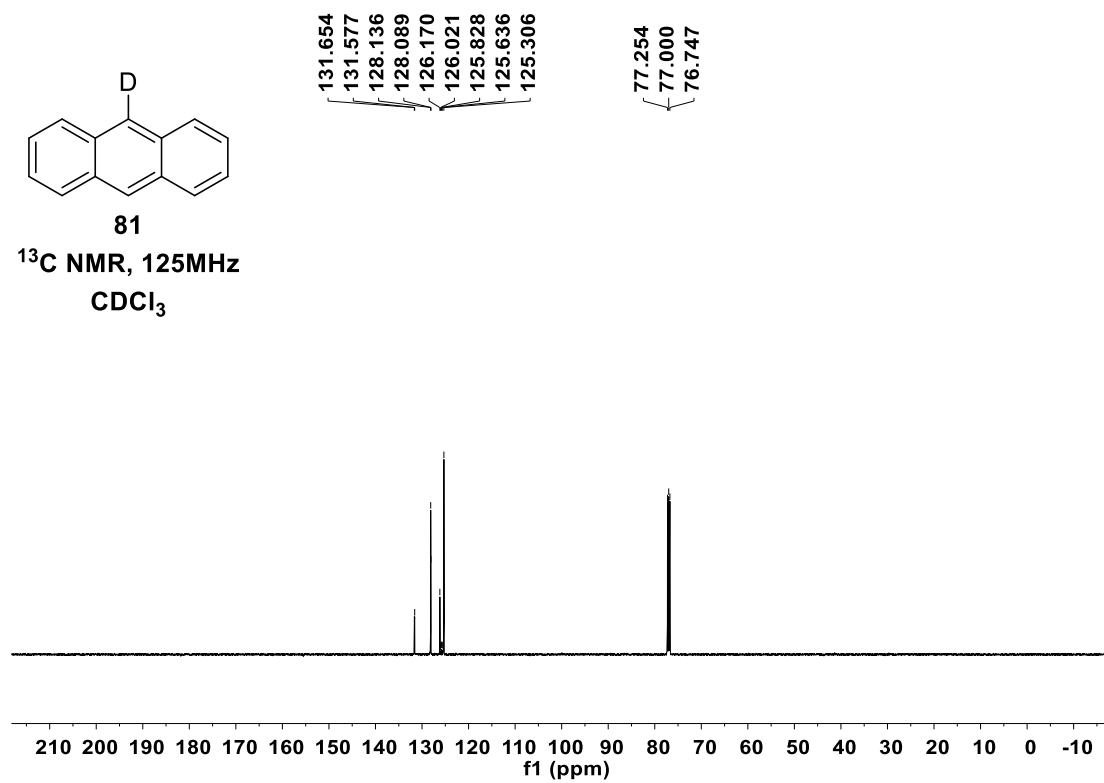

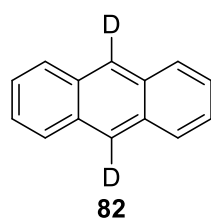

$^1\text{H}$  NMR, 500MHz  
 $\text{CDCl}_3$

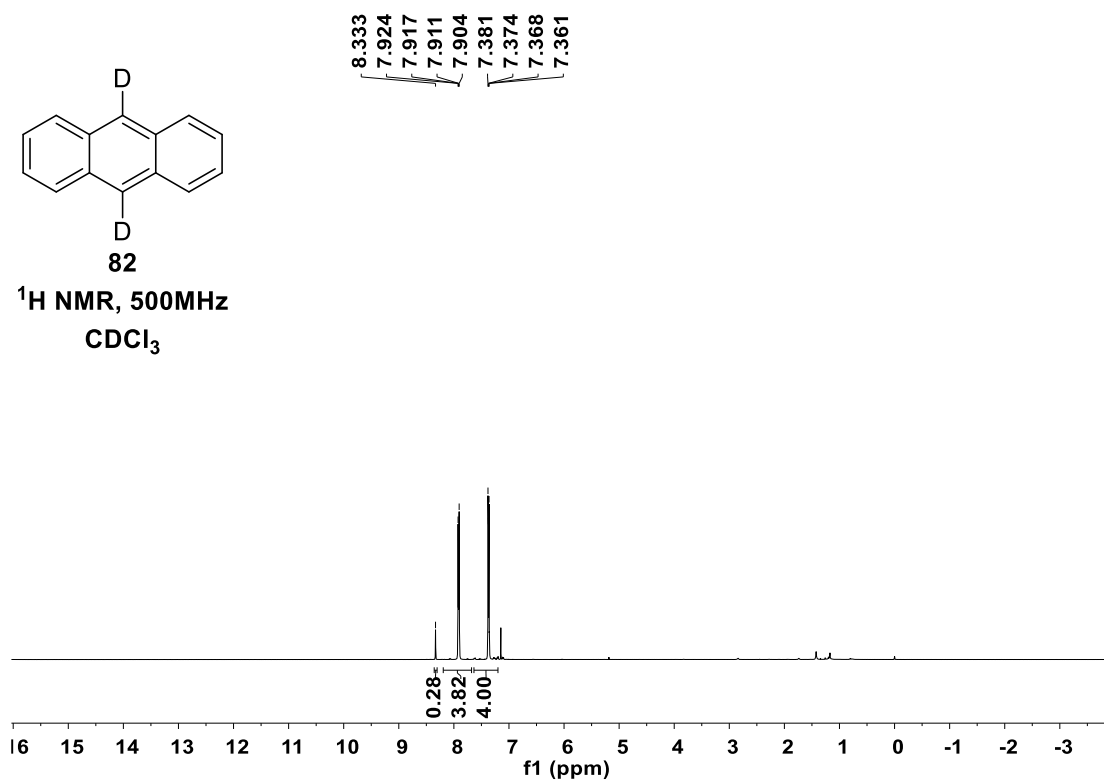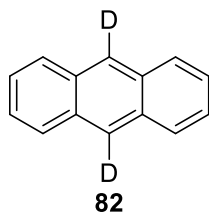

$^{13}\text{C}$  NMR, 125MHz  
 $\text{CDCl}_3$

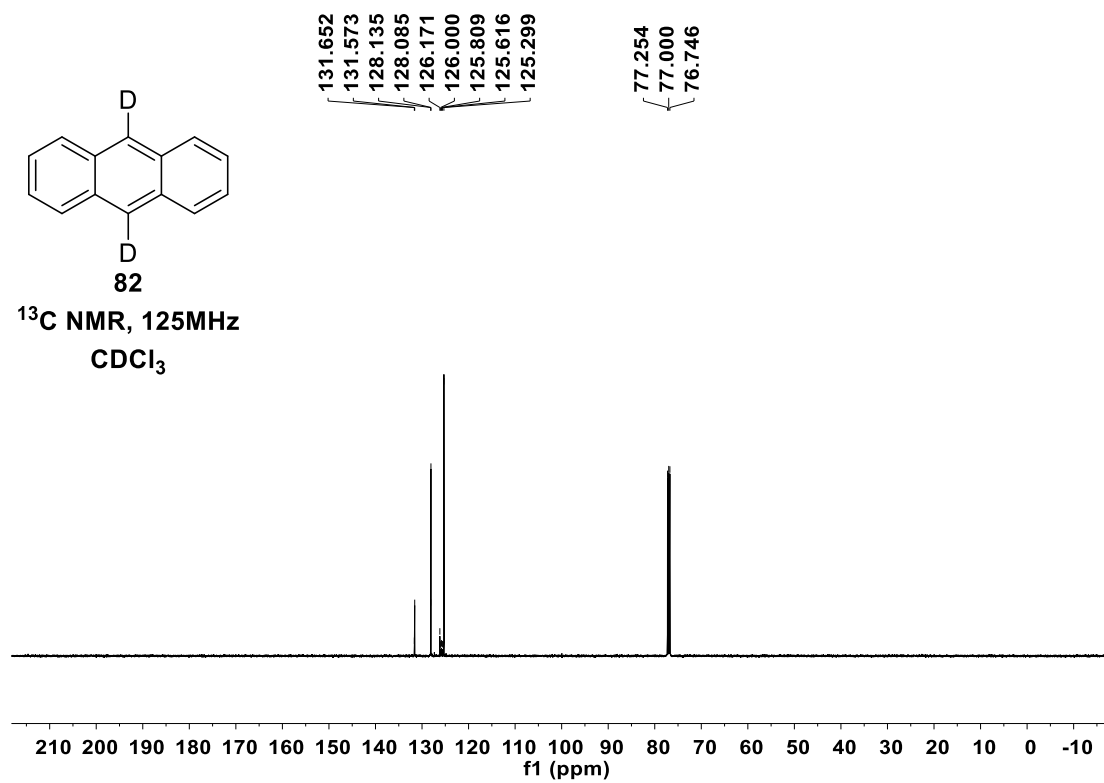

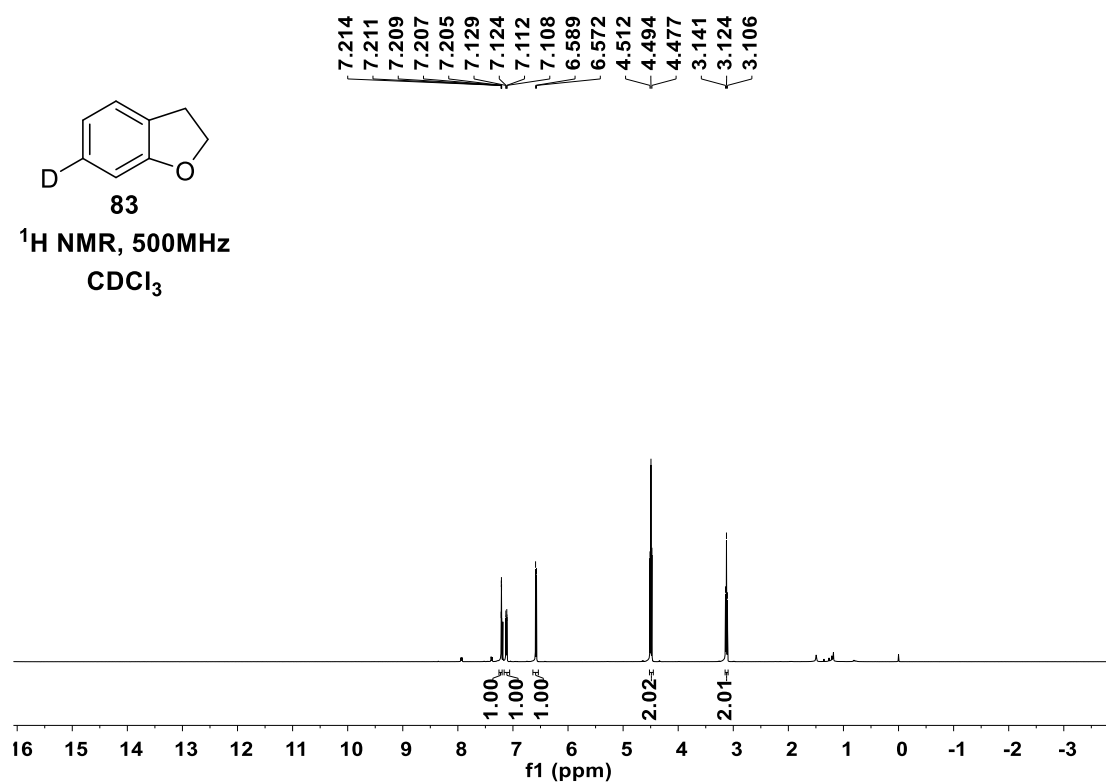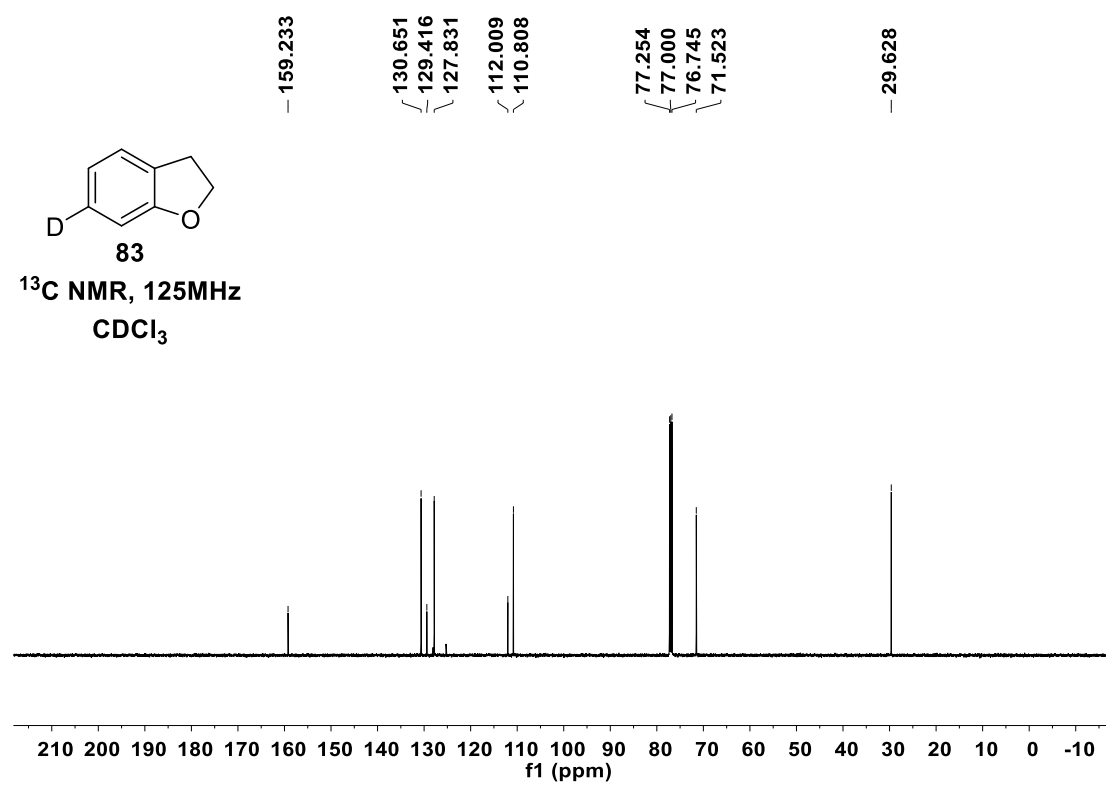

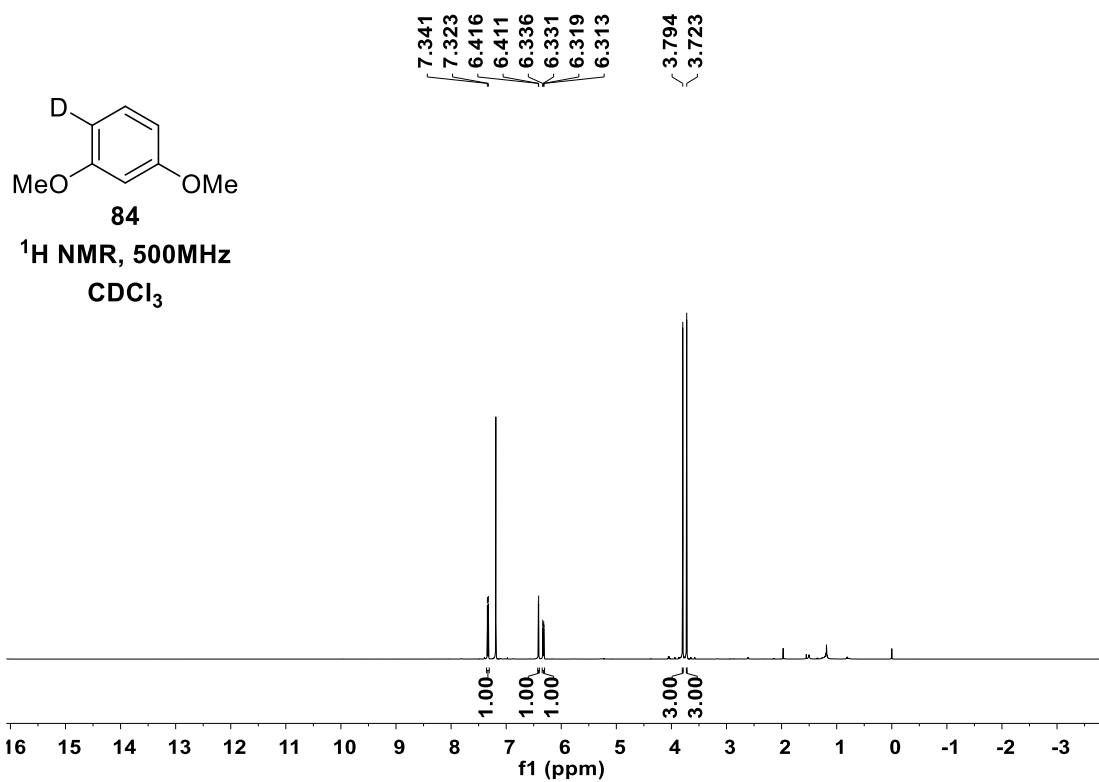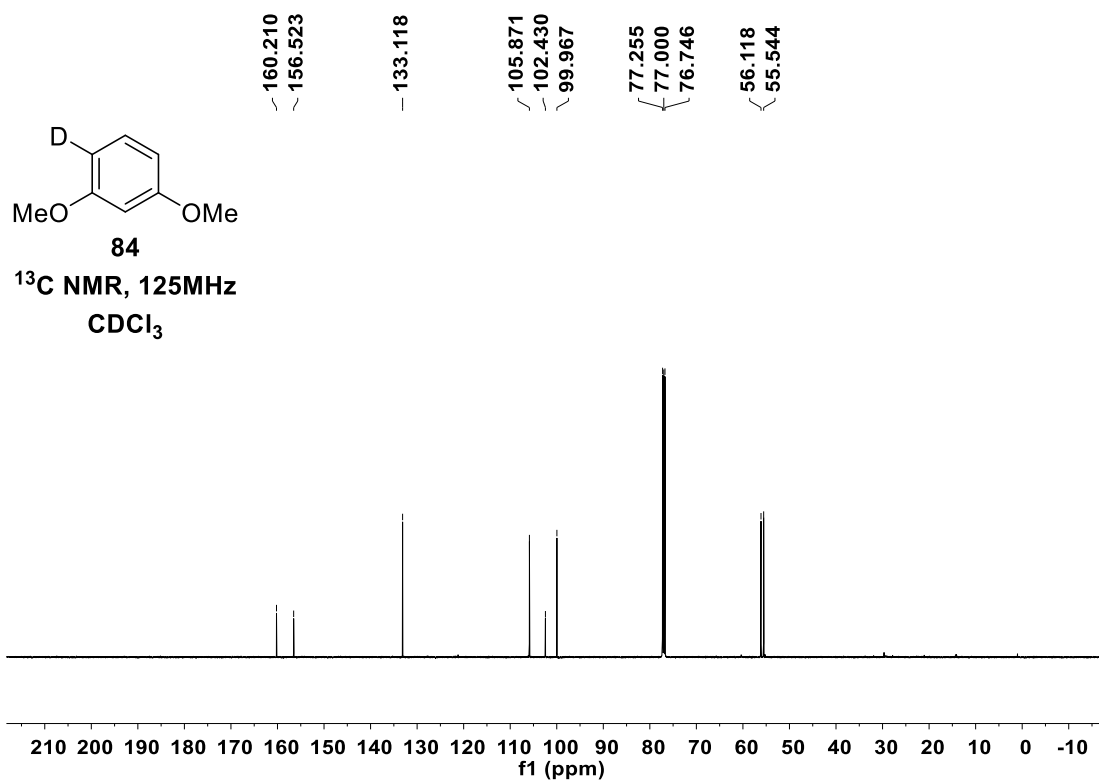

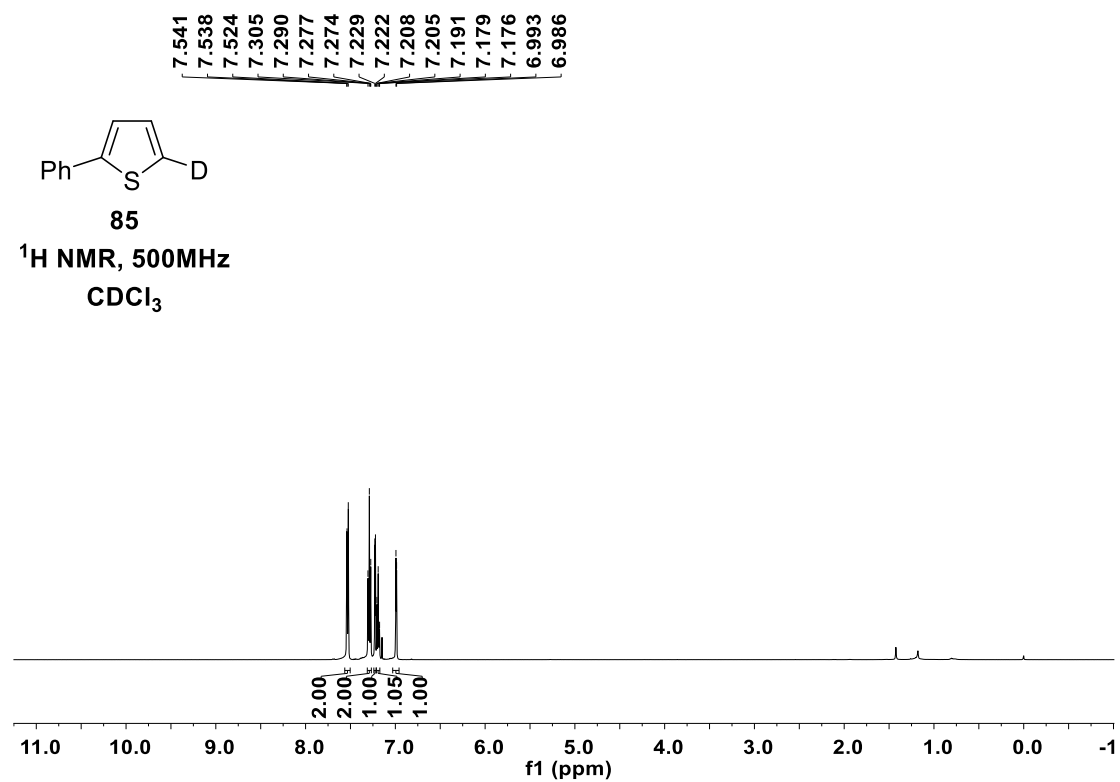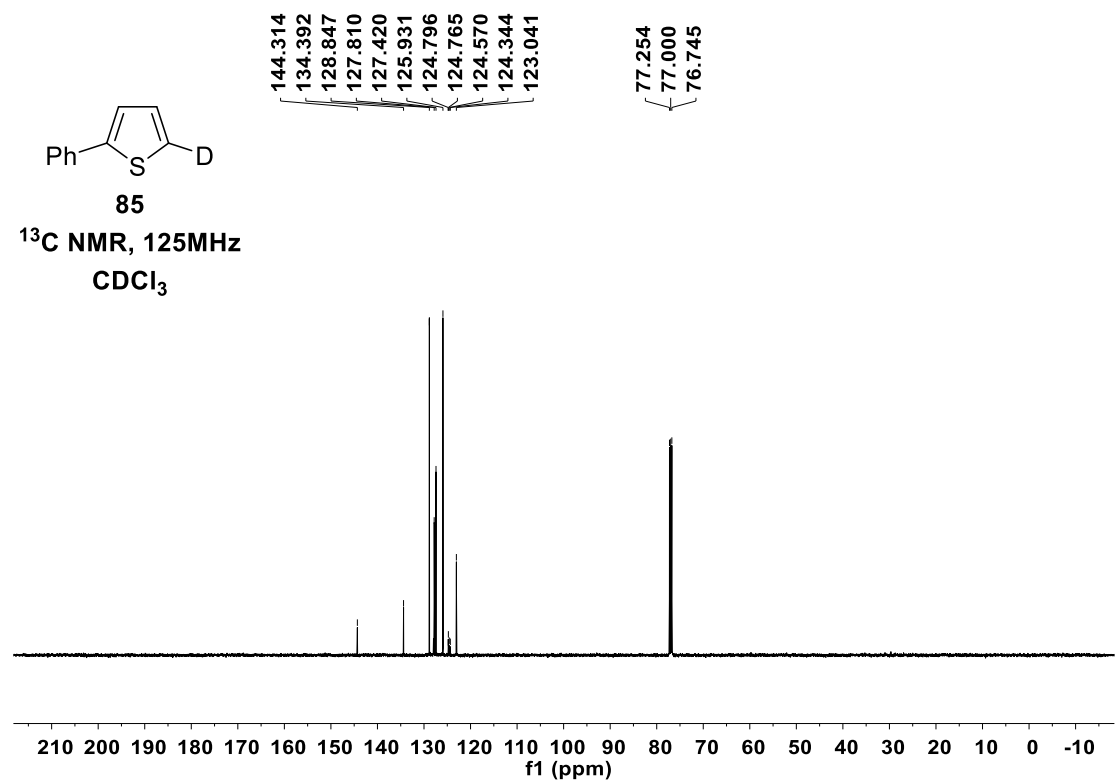

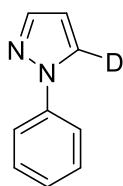

86

<sup>1</sup>H NMR, 500MHz

CDCl<sub>3</sub>

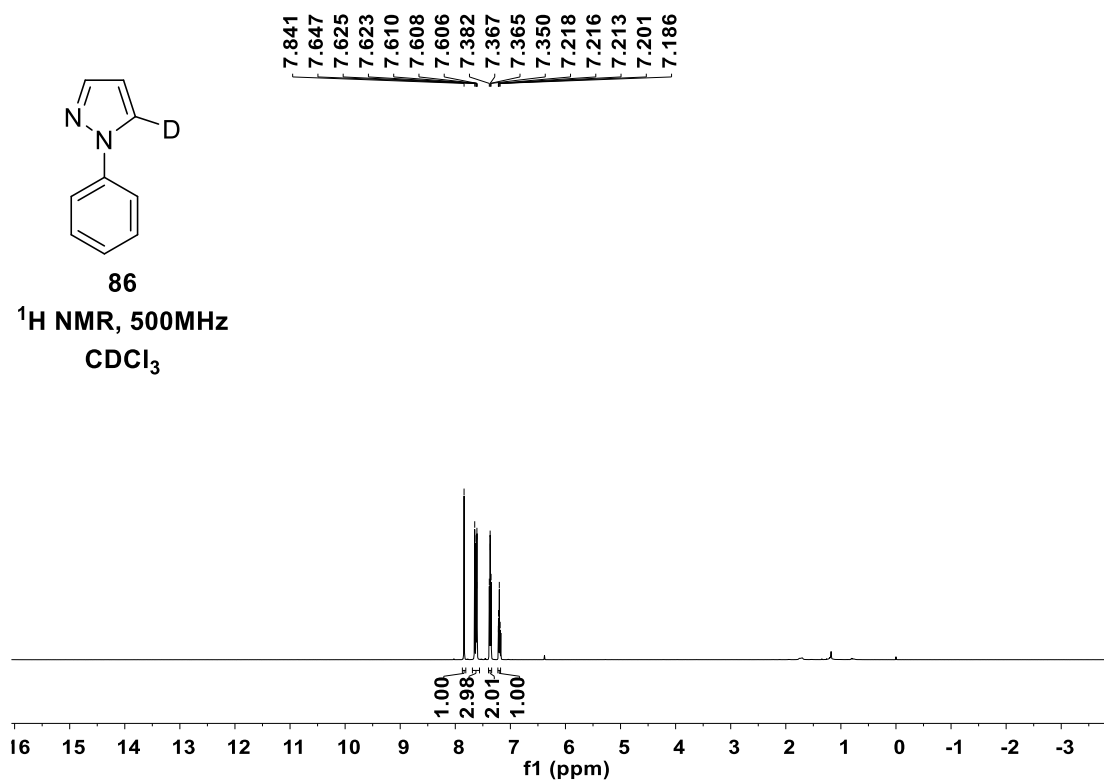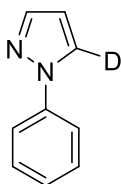

86

<sup>13</sup>C NMR, 125MHz

CDCl<sub>3</sub>

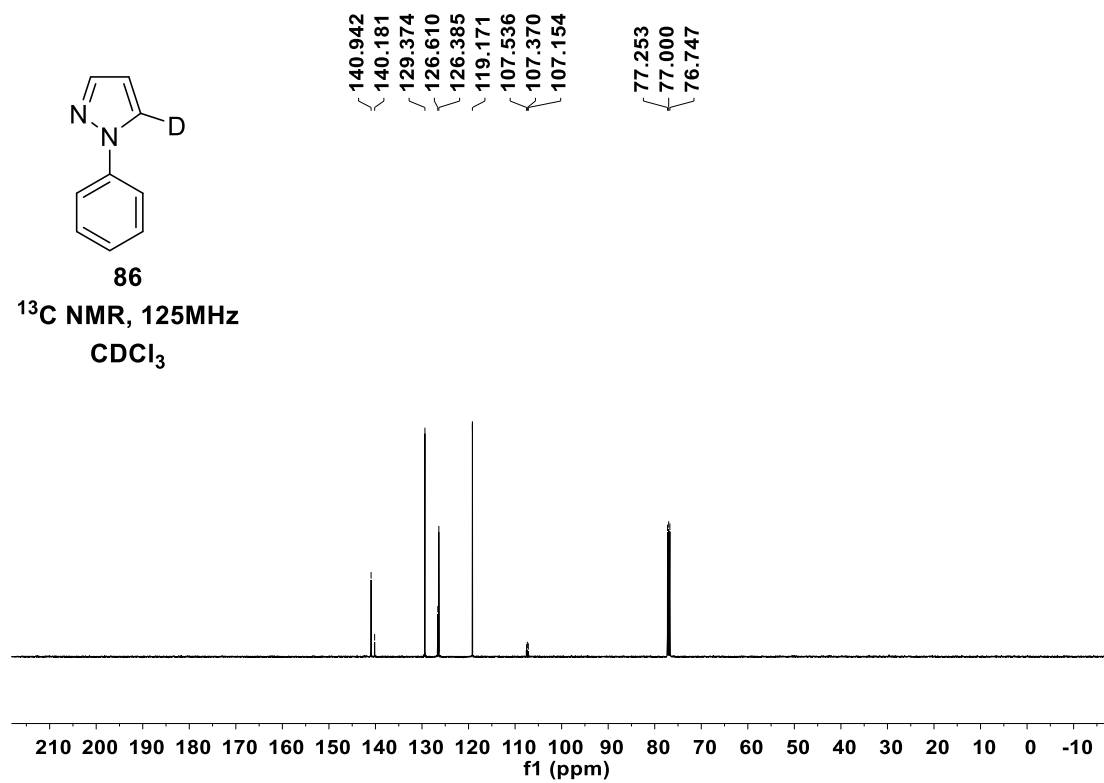

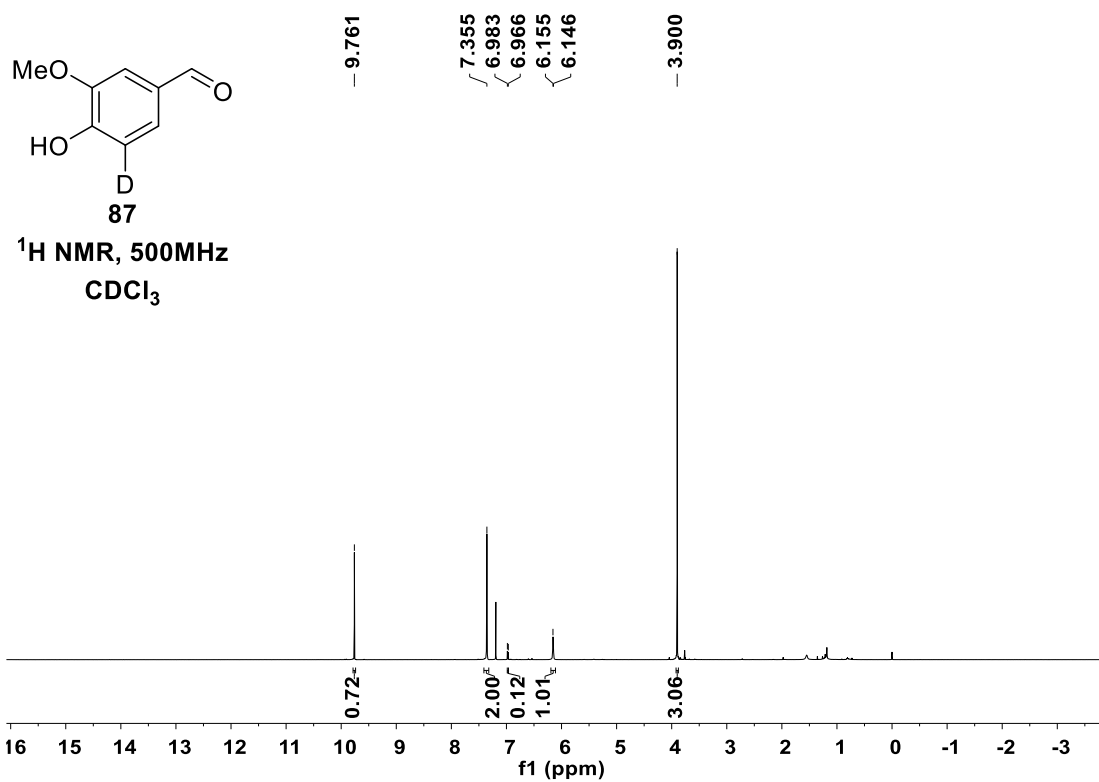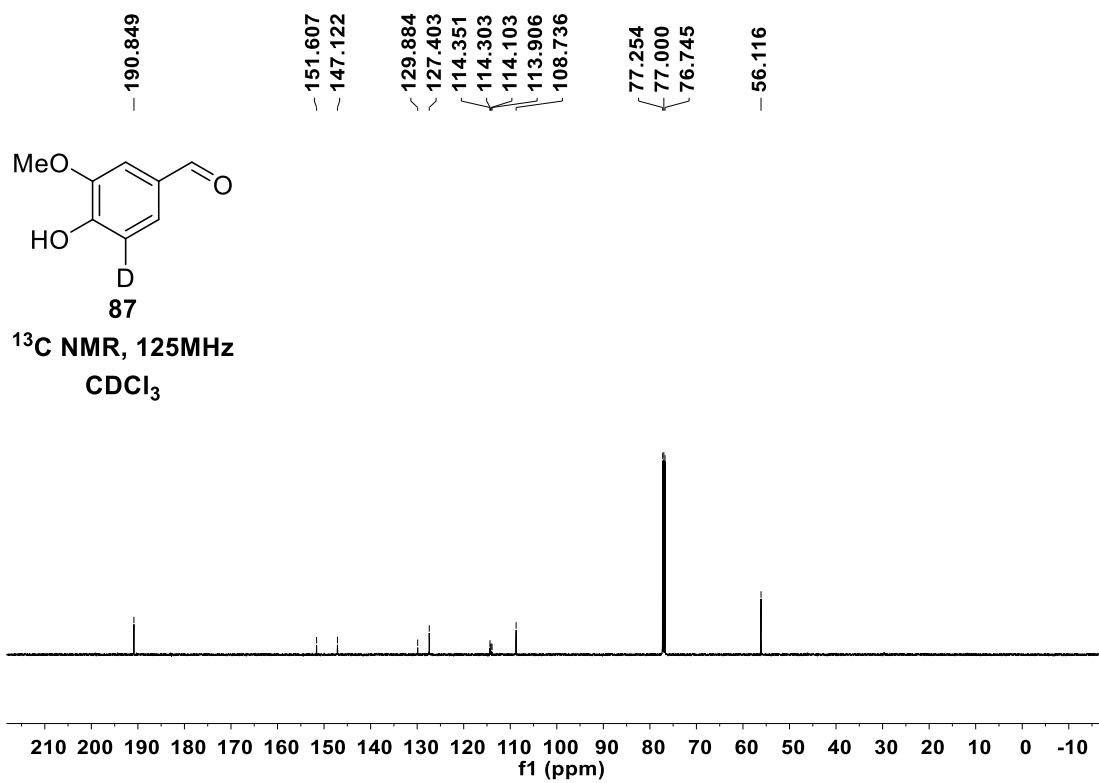

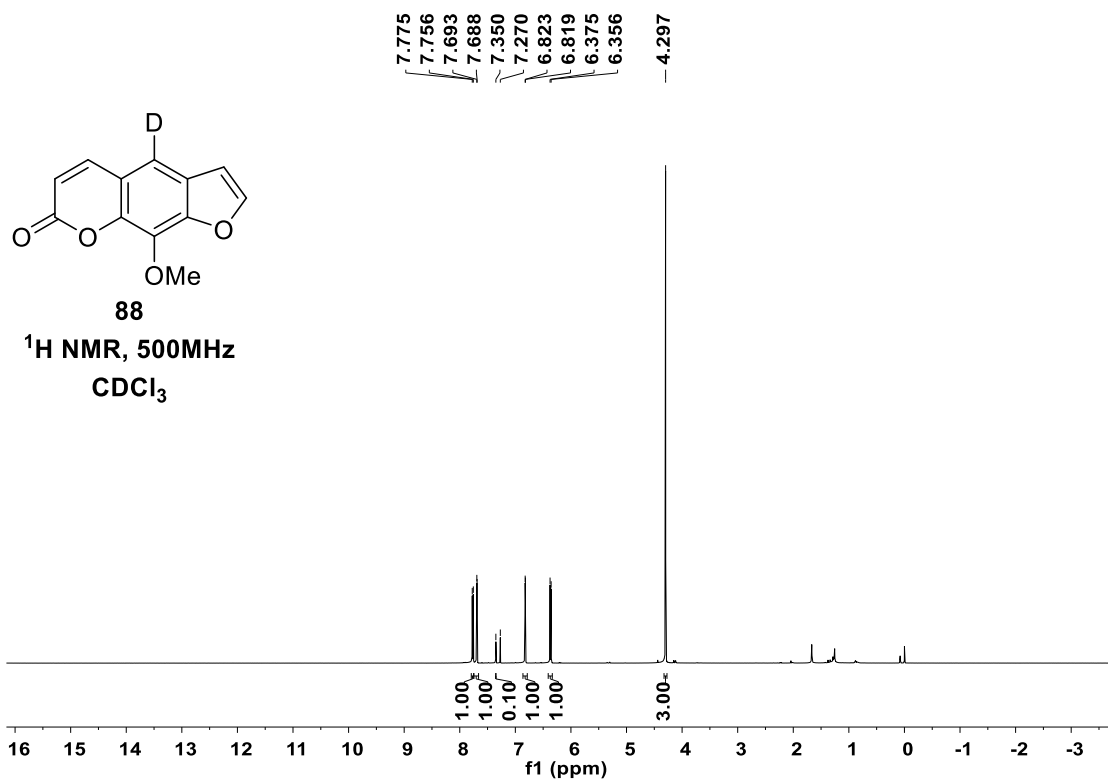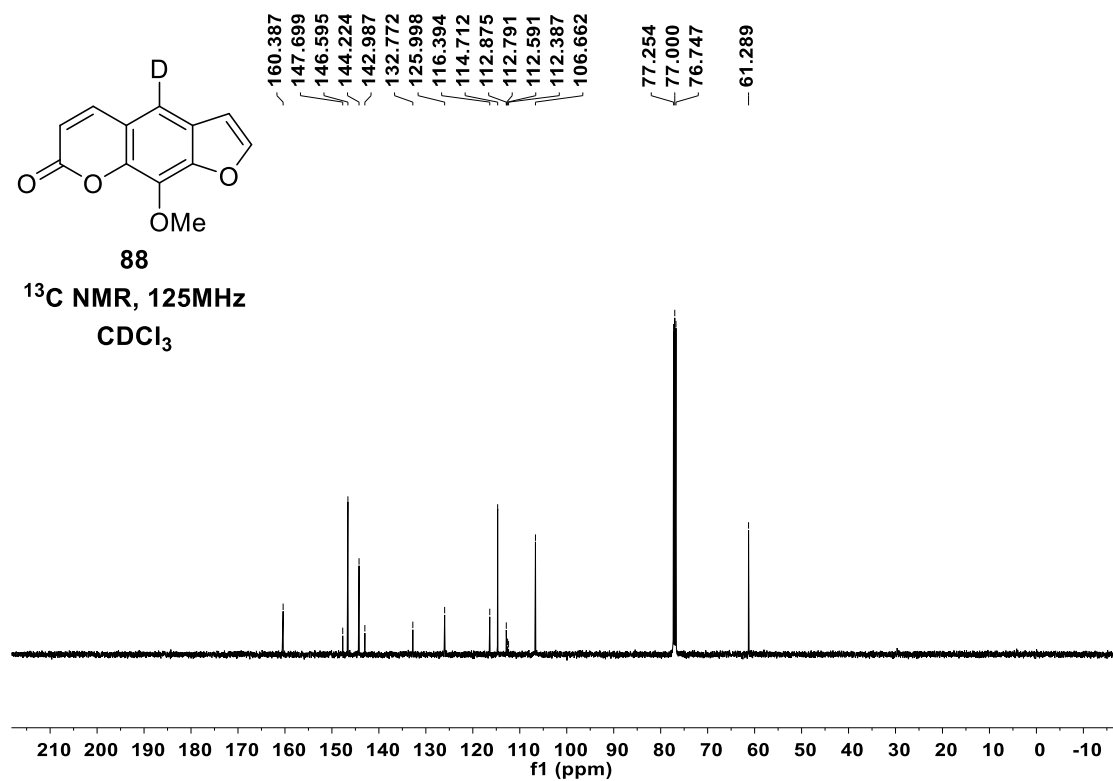

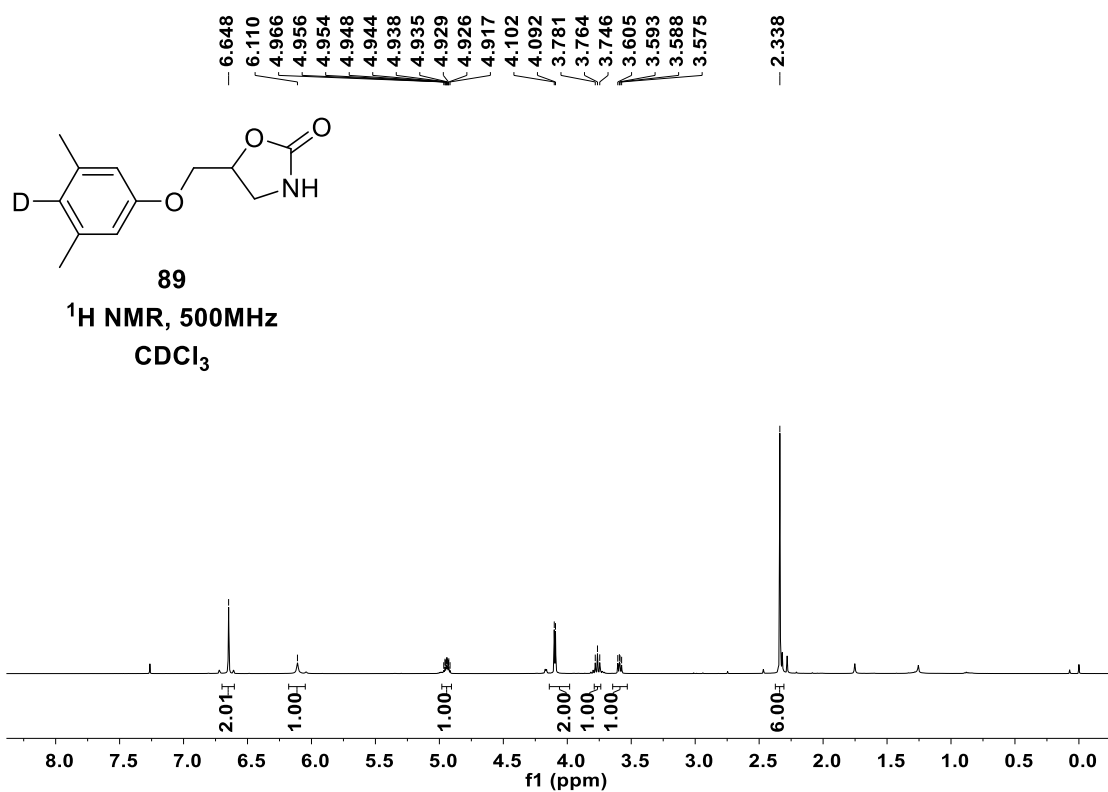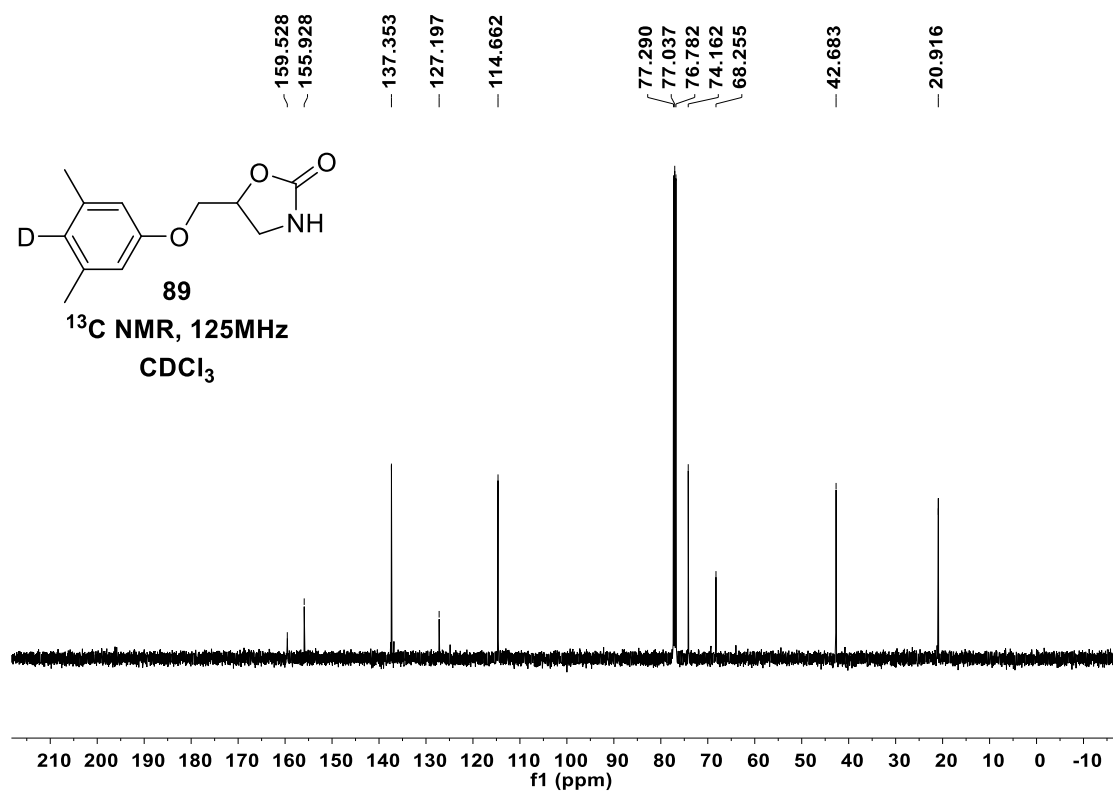

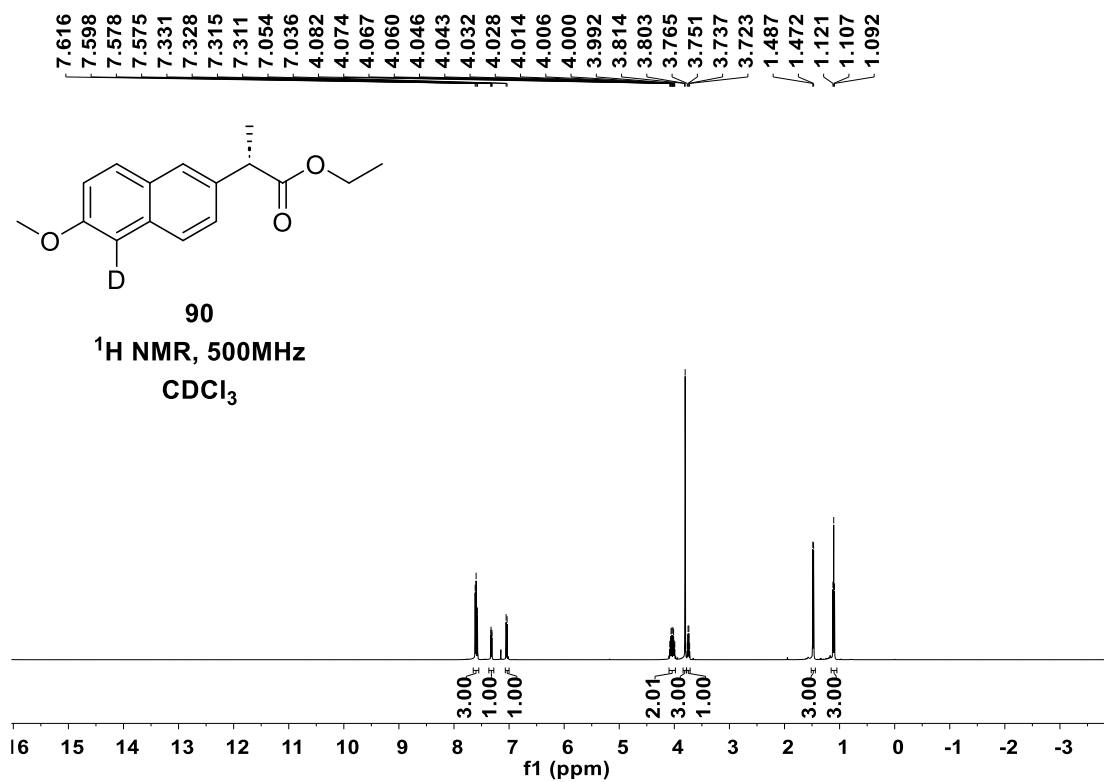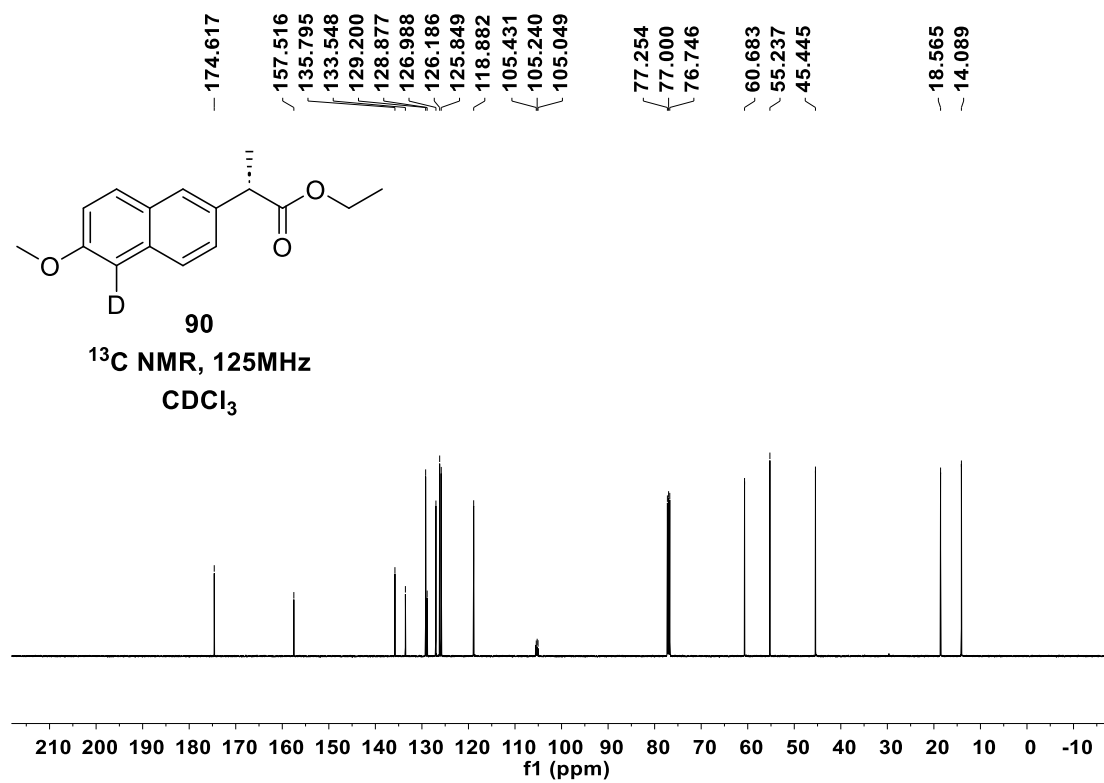

## 8. References

1. Kuriyama, M. et al. Deuterodechlorination of aryl/heteroaryl chlorides catalyzed by a palladium/unsymmetrical NHC system. *J. Org. Chem.* **81**, 8934–8946 (2016).
2. Lu, L., Li, H., Zheng, Y., Bu, F. & Lei, A. Facile and economical electrochemical dehalogenative deuteration of (hetero)aryl halides. *CCS Chem.* **3**, 2669–2675 (2021).
3. Singh, B., Ahmed, J., Biswas, A., Paira, R. Mandal, S. K. Reduced phenalenyl in catalytic dehalogenative deuteration and hydrodehalogenation of aryl halides *J. Org. Chem.* **86**, 7242–7255 (2021).
4. Berger, S. & Diehl, B.W. K. Correlation between deuterium isotope effects and  $^{13}\text{C}$ -NMR chemical shifts in substituted benzenes. *Tetrahedron Lett.* **28**, 1243–1246 (1987).
5. Kameo, H. et al. Palladium–borane cooperation: evidence for an anionic pathway and its application to catalytic hydro-/deutero-dechlorination. *Angew. Chem. Int. Ed.* **58**, 18783–18787 (2019).
6. Liu, C., Han, S., Li, M., Chong, X. & Zhang, B. Electrocatalytic deuteration of halides with  $\text{D}_2\text{O}$  as the deuterium source over a copper nanowire arrays cathode. *Angew. Chem. Int. Ed.* **59**, 18527–18531 (2020).
7. Yang, L., Zhang, C.-P. Additive-free visible-light-mediated hydro-/deuterodediazoniation of arenediazonium tetrafluoroborates in THF/THF- $d_8$  *Asian J. Org. Chem.* **10**, 2157–2160 (2021).
8. Yan, B. et al. Catalyst-free reductive hydrogenation or deuteration of aryl–heteroatom bonds induced by light. *Org. Chem. Front.* **8**, 5244–5249 (2021).
9. Wang, X. et al. General and practical potassium methoxide/disilane-mediated dehalogenative deuteration of (hetero)arylhalides. *J. Am. Chem. Soc.* **140**, 10970–10974 (2018).
10. Lang, Y., Peng, X., Li, C.-J. & Zeng, H. Photoinduced catalyst-free deborylation–deuteration of arylboronic acids with  $\text{D}_2\text{O}$ . *Green Chem.* **22**, 6323–6327 (2020).
11. Zhao, D., Petzold, R., Yan, J., Muri, D. & Ritter, T. Tritiation of aryl thianthrenium salts with a molecular palladium catalyst. *Nature* **600**, 444–449 (2021).
12. Zhou, Z.-Z., Zhao, J.-H., Gou, X.-Y., Chen, X.-M. & Liang, Y.-M. Visible-light-mediated hydrodehalogenation and Br/D exchange of inactivated aryl and alkyl halides with a palladium complex. *Org. Chem. Front.* **6**, 1649–1654 (2019).
13. Wang, Z.-Y. et al. Palladium-catalyzed deuteration of arylketone oxime ethers. *Angew. Chem. Int. Ed.* **63**, e202319773 (2024).
14. Yang, Y., Gao, X., Zeng, X., Han, J. & Xu, B. Hydrogen-bond-donor solvents enable catalyst-free (radio)-halogenation and deuteration of organoborons. *Chem. Eur. J.* **27**, 1297–1300 (2021).
15. Fischer, O., Hubert, A., Heinrich, M. R. Shifted selectivity in protonation enables the mild deuteration of arenes through catalytic amounts of bronsted acids in deuterated methanol. *J. Org. Chem.* **85**, 11856–11866 (2020).
16. Huang, S.-H., Keith, J. M., Hall, M. B. & Richmond, G. M. Ortho-metalation dynamics and ligand fluxionality in the conversion of  $\text{Os}_3(\text{CO})_{10}(\text{dppm})$  to  $\text{HOs}_3(\text{CO})_8[\mu\text{-PhP}(\text{C}_6\text{H}_4\text{-}\mu_2, \eta^1)\text{CH}_2\text{PPh}_2]$ : experimental and DFT evidence for the participation of agostic C–H and  $\pi$ -aryl intermediates at an intact triosmium cluster. *Organometallics* **29**, 4041–4057 (2010).

17. Liu, W. et al. Mesoionic carbene–iridium complex catalyzed ortho-selective hydrogen isotope exchange of anilines with high functional group tolerance. *Org. Lett.* **22**, 2210–2214 (2020).
18. Zhang, H.-H., Bonnesen, P. V. & Hong, K. Palladium-catalyzed Br/D exchange of arenes: selective deuterium incorporation with versatile functional group tolerance and high efficiency. *Org. Chem. Front.* **2**, 1071–1075 (2015).
19. Dong, J. et al. Arylboronic acid deborylation deuteration via synergistic thiol, Lewis Base, and photoredox catalysis. *Org. Lett.* **24**, 2064–2068 (2022).
20. Song, S. et al. DMSO-catalysed late-stage chlorination of (hetero)arenes. *Nat. Catal.* **3**, 107–115 (2020).
21. Rai, P., Maji, K., Jana, S. K., Maji, B. Intermolecular dearomative [4 + 2] cycloaddition of naphthalenes via visible-light energy-transfer-catalysis. *Chem. Sci.* **13**, 12503–12510 (2022).
22. Fang, Y., Rogge, T., Ackermann, L., Wang, S.-Y., Ji, S.-J. Nickel-catalyzed reductive thiolation and selenylation of unactivated alkyl bromides. *Nat. Commun.* **9**, 2240–2249 (2018).
23. Falk, E., Gasser, V. C. M. Morandi, B. Synthesis of N-alkyl anilines from arenes via iron-promoted aromatic C–H amination. *Org. Lett.* **23**, 1422–1426 (2021).
24. Xu, G. et al. Synthesis and bioactivities of novel piperazine-containing 1,5-Diphenyl-2-penten-1-one analogues from natural product lead. *Bioorg. Med. Chem. Lett.* **26**, 1849–1853 (2016).
25. Pierson, C. N. & Hartwig, J. F. Mapping the mechanisms of oxidative addition in cross-coupling reactions catalysed by phosphine-ligated Ni(0). *Nat. Chem.* **16**, 930–937 (2024).
26. Liu, Q. et al. Revealing a second transmetalation step in the Negishi coupling and its competition with reductive elimination: improvement in the interpretation of the mechanism of biaryl syntheses. *J. Am. Chem. Soc.* **131**, 10201–10210 (2009).
27. Sakai, M. et al. Metallic nickel-catalyzed reduction of aryl halides with zinc powder and ethanol. *B. Chem. Soc. Jpn.* **65**, 1739–1740 (1992).
28. Lin, C., Zhang, J., Zhang, Z., Chong, Q., Meng, F. Cobalt-catalyzed diastereo- and enantioselective reductive coupling of cyclobutenes and aldehydes through umpolung reactivity. *Chem. Sci.* doi: <https://doi.org/10.1039/d5sc03755g>.
29. Zhang, J. et al. Mechanochemical nickel-catalyzed dechlorination-deuteration of aryl chlorides via piezoelectric-promoted Ar–Zn–X intermediates. *ACS Catal.* **15**, 14794–14804 (2025).
30. He, R.-D. et al. Reductive alkylation of alkenyl acetates with alkyl bromides by nickel catalysis. *Angew. Chem. Int. Ed.* **61**, e202114556 (2022).
31. Biswas, S., Weix, D. J. Mechanism and selectivity in nickel-catalyzed cross-electrophile coupling of aryl halides with alkyl halides. *J. Am. Chem. Soc.* **135**, 16192–16197 (2013).
